# Supplementary material for: Technology Readiness and Acceptance (2000–2024): A Bibliometric and Systematic Review toward the TRAS Framework
Source: Research Square preprint supplement (doi:10.21203/rs.3.rs-8359750/v1), 2025-12-19
Supplement: Supplementary file 1 [file 1f94d3f7af17d8923302896f.xlsx]

## Sheet: Sheet1
Authors	Title	Year	Source title	TCRaw	DOI	Link	Abstract	Author Keywords	Index Keywords	References	Editors	Publisher	JIF	ClusterName	Theme_Keywords	Scopus_Quadrant	Cluster_Number	Cluster_N	CSI	FS	CR_Raw	CR_Normalized	PVI_Raw	PVI_Normalized	KG_Raw	KG_Normalized	PEI_Raw	PEI_Normalized	MRI_Raw	MRI_Normalized	BS_Raw	BS_Normalized	Existing_Theme_Quadrant	Emerging_Theme_Quadrant
Lappeman J.; du Plessis L.; Ho E.; Louw E.; Egan P.	Africa’s heterogeneous middle class: A 10-city study of consumer lifestyle indicators	2021	International Journal of Market Research	4	10.1177/1470785320939038	https://www.scopus.com/inward/record.uri?eid=2-s2.0-85099682461&doi=10.1177%2f1470785320939038&partnerID=40&md5=4f95bb1bc5873e02f600370120345060	Income and living standards measures have long been used in market research and marketing in Africa. This study examined a set of lifestyle indicators (both belongings and behaviors) to determine their success in profiling middle-class consumers in sub-Saharan Africa. The African middle class exhibits robust growth and the definition of the lifestyle of these consumers is a major topic for debate…	education; employment; expenditure; health care; housing; income; internet penetration; lifestyle indicators; middle class; sub-Saharan Africa		Aaker D.A., Marketing research, (2011); African economic outlook 2016: Sustainable cities and structural transformation, (2016); Ainsworth M., Van der Gaag J., Guidelines for adapting the LSMs Living Standards Questionnaires to local conditions, (1988); Altimir O., Sourrouille J., An overview of main problems, (1980); Aryeetey E., Udry C., Saving in Sub-Saharan Africa, (2000); Attwell W., 3 thing…		SAGE Publications Ltd	1.4	Theme 2: china, investments, electric vehicle, electric vehicles	china, investments, electric vehicle, electric vehicles	Q2	2	462	0.2421	0.3314	47.0952	0.1576	0	0.5	0.4028	0.1343	6.843	0.9185	0.0957	0.3025	0.0068	0.0356	Q4: Emerging / Structural	Q4: Frontier / Niche
Schneider P.; Sting F.J.	EMPLOYEES’ PERSPECTIVES ON DIGITALIZATION-INDUCED CHANGE: EXPLORING FRAMES OF INDUSTRY 4.0	2020	Academy of Management Discoveries	39	10.5465/amd.2019.0012	https://www.scopus.com/inward/record.uri?eid=2-s2.0-85152450772&doi=10.5465%2famd.2019.0012&partnerID=40&md5=f3af1f45e3f39bdc75f907462360cb28	How do employees perceive strategic technology initiatives? Understanding this is cru-cial for attaining employees’ acceptance, and so for successful initiative implementation. Drawing on timely cases of digitalization-induced change initiatives triggered by Industry 4.0, the digital networking of the manufacturing industry, we investigate manufacturing employees’ thoughts and feelings with regar…			Albarracin D., Shavitt S., Attitudes and attitude change, Annual Review of Psychology, 69, pp. 299-327, (2018); Alvesson M., Karreman D., Constructing mystery: Empirical matters in theory development, Academy of Management Review, 32, 4, pp. 1265-1281, (2007); Anand G., Ward P. T., Tatikonda M. V., Role of explicit and tacit knowledge in six sigma projects: An empirical examination of differentia…		Academy of Management	4.3	Not Clustered (Low Keyword Overlap)		Q1	-1	0	0	0	0	0	0	0	0	0	0	0	0	0	0	0
Gupta R.; Jain K.	Adoption of mobile telephony in rural India: An empirical study	2014	Decision Sciences	30	10.1111/deci.12068	https://www.scopus.com/inward/record.uri?eid=2-s2.0-84898796158&doi=10.1111%2fdeci.12068&partnerID=40&md5=44b6698ed73ba9dcde08ceaac97e05f9	Mobile telephony has become one of the major factors driving the social and economic development of a country. The objective of this article is to identify factors affecting the adoption of mobile telephony in rural India and examine their impact on its adoption. An explanatory empirical methodology with sequential design was used for this purpose, and new factors that affect users' decisions to …	Adoption; India; Mobile telephony; Rural		Abraham R., Mobile phones and economic development: Evidence from the fishing industry in India, Information Technology and International Development, 4, 1, pp. 5-17, (2007); Agarwal R., Prasad J., Are individual differences germane to the acceptance of new technologies?, Decision Sciences, 30, 2, pp. 361-391, (1999); Ajzen I., Fishbein M., Attitude-behavior relations theoretical analysis and rev…		Blackwell Publishing Ltd	2.5	Theme 5: health care, mhealth, india, internet of things	health care, mhealth, india, internet of things	Q1	5	136	0.2703	0.3017	47.4706	0.1609	0	0.5	0.6316	0.2105	5.3761	0.3943	0.0957	0.3027	0.015	0.3605	Q3: Niche / Transient	Q4: Frontier / Niche
Galetsi P.; Katsaliaki K.; Kumar S.; Ferguson M.	What affects consumer behavior in mobile health professional diagnosis applications	2023	Decision Sciences	2	10.1111/deci.12550	https://www.scopus.com/inward/record.uri?eid=2-s2.0-85116855183&doi=10.1111%2fdeci.12550&partnerID=40&md5=f853d909285c8c3e5560f6843ff85c8d	In recent years, an increasing number of health diagnosis mobile apps have been developed and marketed to assist health professionals in the process of diagnosis. Yet, there is limited knowledge about the factors and app characteristics that affect their selection from health professionals. In this study, we investigate the specific apps’ market that is addressed to medical professionals/students…	consumer behavior; evaluation; health diagnosis; MARS; medical professionals; mHealth apps; mobile applications; regression analysis		Agarwal P., Gordon D., Griffith J., Kithulegoda N., Witteman H.O., Bhatia R.S., Et al., Assessing the quality of mobile applications in chronic disease management: A scoping review, NPJ Digital Medicine, 4, 1, pp. 1-8, (2021); Agarwal R., Prasad J., Are individual differences germane to the acceptance of new information technologies?, Decision Sciences, 30, 2, pp. 361-391, (1999); Agarwal R., Pra…		John Wiley and Sons Inc	2.5	Theme 10: retailing, mobile phone, shopping activity, social influence	retailing, mobile phone, shopping activity, social influence	Q1	10	90	0.5901	0.2244	68.1556	0.3416	0	0.5	0.0526	0.0175	4.2725	0	0.1463	0.8713	0.0249	0.75	Q1: Core / Established	Q1: Emerging / Growth
Li Q.; Li Y.; Yuan T.; Chen D.	Analysis of Security Threats in the Supply Chain of ICT Products Based on Evolutionary Game Theory	2023	Group Decision and Negotiation	1	10.1007/s10726-023-09839-9	https://www.scopus.com/inward/record.uri?eid=2-s2.0-85163372574&doi=10.1007%2fs10726-023-09839-9&partnerID=40&md5=968552d68e4755e8628fae33b679d643	The network information security regulation of information and communication technology (ICT) product supply chain is an important issue for governments globally. The whole life cycle of ICT supply chain is a complex process, comprising the design and development stage, outsourcing integration stage and service operation and maintenance stage. Each of these stages may be maliciously attacked, lea…	Dynamic strategy; Evolutionary game theory; Government supervision; ICT products supply chain; Information security; System dynamics		Abolfazli N., Eshghali M., Ghomi S.M.T.F., Pricing and coordination strategy for green supply chain under two production modes, 2022 Systems and Information Engineering Design Symposium (SIEDS)., pp. 13-18, (2022); Andy P., The Global Cyber Security Challenge, (2016); Taiwan semiconductor manufacturing: Ransomware attack shut down, manufacturing industrial control information security is urgent, …		Springer Science and Business Media B.V.	2.5	Theme 2: china, investments, electric vehicle, electric vehicles	china, investments, electric vehicle, electric vehicles	Q1	2	462	0.2421	0.3314	47.0952	0.1576	0	0.5	0.4028	0.1343	6.843	0.9185	0.0957	0.3025	0.0068	0.0356	Q4: Emerging / Structural	Q4: Frontier / Niche
Sterman J.	System dynamics at sixty: the path forward	2018	System Dynamics Review	103	10.1002/sdr.1601	https://www.scopus.com/inward/record.uri?eid=2-s2.0-85053439359&doi=10.1002%2fsdr.1601&partnerID=40&md5=3234ff123ea9c3bb5e0562dadb8d443d	The late Jay Forrester founded the field of system dynamics 60 years ago. On this anniversary I ask what lessons his remarkable life of innovation and impact hold for the field. From a Nebraska ranch to MIT, servomechanisms, digital computing and system dynamics, Jay lived his entire life on the frontier, innovating to solve critical problems. Today, more than ever, humanity faces grave threats a…		Nebraska; United States; innovation; knowledge; technology adoption; theoretical study	Abdelbari H., Shafi K., A computational intelligence-based method to “learn” causal loop diagram-like structures from observed data, System Dynamics Review, 33, 1, pp. 3-33, (2017); Agarwal J., DeSarbo W.S., Malhotra N.K., Rao V.R., An interdisciplinary review of research in conjoint analysis: recent developments and directions for future research, Customer Needs and Solutions, 2, 1, pp. 19-40, (…		John Wiley and Sons Ltd	2.5	Theme 8: social media, social networking (online), knowledge, psychology	social media, social networking (online), knowledge, psychology	Q1	8	112	0.5845	0.1818	113.589	0.7384	0	0.5	0.2083	0.0694	5.2199	0.3385	0.096	0.3056	0.0183	0.4931	Q1: Core / Established	Q2: Mature / Potential
Han H.S.; Verma R.	Why Attend Tradeshows? A Comparison of Exhibitor and Attendee’s Preferences	2014	Cornell Hospitality Quarterly	21	10.1177/1938965514537550	https://www.scopus.com/inward/record.uri?eid=2-s2.0-84910049586&doi=10.1177%2f1938965514537550&partnerID=40&md5=c45053f18049e0b7ec0102c745b143f4	Tradeshows and conventions continue to thrive in the twenty-first century, both for information exchanges and direct selling, but numerous forces have meant changes in show operation and in participants’ selection criteria for attendance. A study of more than 2,500 tradeshow exhibitors and attendees document a clear bifurcation in the reasons for attendance in these two groups. Exhibitors are pri…	best–worst analysis; meetings, incentives, conventions, and exhibitions (MICE) industry; social media; sustainability; tradeshow criteria; tradeshows		Akhtar S., Social media and brand loyalty, (2011); InterBev 2008 announces new “green aisle.”www.ameribev.org/news-media/news-releases-statements/more/82/ (accessed April, 29, (2008); Berthon P., Pitt L., Katsikeas C.S., Berthon J.P., Executive insights: Virtual services go international: International services in the marketplace, Journal of International Marketing, 7, 3, pp. 84-105, (1999); Chac…		SAGE Publications Inc.	3	Theme 8: social media, social networking (online), knowledge, psychology	social media, social networking (online), knowledge, psychology	Q1	8	112	0.5845	0.1818	113.589	0.7384	0	0.5	0.2083	0.0694	5.2199	0.3385	0.096	0.3056	0.0183	0.4931	Q1: Core / Established	Q2: Mature / Potential
Canhoto A.I.; Arp S.	Exploring the factors that support adoption and sustained use of health and fitness wearables	2017	Journal of Marketing Management	155	10.1080/0267257X.2016.1234505	https://www.scopus.com/inward/record.uri?eid=2-s2.0-84992417802&doi=10.1080%2f0267257X.2016.1234505&partnerID=40&md5=cbf5da8892b9b232972d91169c192557	The Internet of Things (IoT) and, particularly, wearable products have changed the focus of the healthcare industry to prevention programmes that enable people to become active and take responsibility for their own health. These benefits will only materialise, however, if users adopt and continue to use these products, as opposed to abandoning them shortly after purchase. Our study investigates h…	consumer behaviour; health and fitness; Internet of Things; technology adoption; wearables		Ajzen I., Fishbein M., The influence of attitudes on behavior, The handbook of attitudes, pp. 173-221, (2005); Akter S., D'Ambra J., Ray P., Development and validation of an instrument to measure user perceived service quality of mHealth, Information & Management, 50, 4, pp. 181-195, (2013); Ambacher N., Carl M., Knapp D., Personalisierte medizin der zukunft. Trendstudie des 2b AHEAD ThinkTanks, …		Routledge	3	Theme 5: health care, mhealth, india, internet of things	health care, mhealth, india, internet of things	Q1	5	136	0.2703	0.3017	47.4706	0.1609	0	0.5	0.6316	0.2105	5.3761	0.3943	0.0957	0.3027	0.015	0.3605	Q3: Niche / Transient	Q4: Frontier / Niche
Roy S.K.; Balaji M.S.; Nguyen B.	Consumer-computer interaction and in-store smart technology (IST) in the retail industry: the role of motivation, opportunity, and ability	2020	Journal of Marketing Management	34	10.1080/0267257X.2020.1736130	https://www.scopus.com/inward/record.uri?eid=2-s2.0-85082407041&doi=10.1080%2f0267257X.2020.1736130&partnerID=40&md5=496e727f5d1bb926e950c348115548cf	Recent advances in technology have led to the emergence of smart technology systems in brick-and-mortar stores. This study aims to explore the factors that influence customer adoption of in-store smart technology in a retail setting. By adopting the motivation, opportunity, and ability framework, the present study examines the role of relative advantage, perceived complexity, flow experience, enj…	ability; culture; motivation; opportunity; PLS path modelling; smart retailing; Smart technology		Agarwal R., Karahanna E., Time flies when you’re having fun: Cognitive absorption and beliefs about information technology usage, MIS Quarterly, 24, 4, pp. 665-694, (2000); Agarwal R., Prasad J., The antecedents and consequents of user perceptions in information technology adoption, Decision Support Systems, 22, 1, pp. 15-29, (1998); Ajzen I., The theory of planned behavior, Organizational Behavi…		Routledge	3	Theme 8: social media, social networking (online), knowledge, psychology	social media, social networking (online), knowledge, psychology	Q1	8	112	0.5845	0.1818	113.589	0.7384	0	0.5	0.2083	0.0694	5.2199	0.3385	0.096	0.3056	0.0183	0.4931	Q1: Core / Established	Q2: Mature / Potential
Akter S.; Mohiuddin Babu M.; Hossain M.A.; Hani U.	How does value co-creation transform quality of life at the bottom of the pyramid?	2021	Journal of Marketing Management	7	10.1080/0267257X.2021.1919745	https://www.scopus.com/inward/record.uri?eid=2-s2.0-85106324924&doi=10.1080%2f0267257X.2021.1919745&partnerID=40&md5=b3ef5621f26c8f29bccca5dbcf9da4ed	Value co-creation (VCC) has gained momentum in recent years due to the dramatic growth of digital technology. There is an ever-growing surge in academia and industry to understand the dimensions and outcomes of VCC through various digital platforms. However, there is sparse literature on VCC in the bottom of the pyramid (BoP) context, especially for technology-driven healthcare. Drawing on the se…	bottom of the pyramid; customer empowerment; mHealth; quality of life; Value co-creation		Achrol R.S., Kotler P., Frontiers of the marketing paradigm in the third millennium, Journal of the Academy of Marketing Science, 40, 1, pp. 35-52, (2012); Ajzen I., Fishbein M., Predicting and understanding consumer behavior: Attitude-behavior correspondence, Understanding attitudes and predicting social behavior, pp. 148-172, (1980); Akman H., Plewa C., Conduit J., Co-creating value in online i…		Routledge	3	Theme 5: health care, mhealth, india, internet of things	health care, mhealth, india, internet of things	Q1	5	136	0.2703	0.3017	47.4706	0.1609	0	0.5	0.6316	0.2105	5.3761	0.3943	0.0957	0.3027	0.015	0.3605	Q3: Niche / Transient	Q4: Frontier / Niche
Lu Y.; Papagiannidis S.; Alamanos E.	Adding ‘things’ to the internet: exploring the spillover effect of technology acceptance	2021	Journal of Marketing Management	7	10.1080/0267257X.2021.1886156	https://www.scopus.com/inward/record.uri?eid=2-s2.0-85101020868&doi=10.1080%2f0267257X.2021.1886156&partnerID=40&md5=8dfd4ffa72c05f46d73aa6761ad5cb89	The Internet of Things (IoT) describes a promising future in which anyone and anything can be connected at any time and any place. This study aims to explore how users’ Internet-based predispositions could influence their IoT acceptance and if there is a spillover of psychological outcomes such as affect, values and cognitive thoughts. The hypothesised research framework is tested using structura…	emotions; internet of things; perceived value; Spillover effect; technology acceptance; well-being		Agarwal R., Karahanna E., Time flies when you’re having fun: Cognitive absorption and beliefs about information technology usage, MIS Quarterly, 24, 4, pp. 665-694, (2000); Anderson L., Ostrom A.L., Corus C., Fisk R.P., Gallan A.S., Giraldo M., Mende M., Mulder M., Rayburn S.W., Rosenbaum M.S., Shirahada K., Williams J.D., Transformative service research: An agenda for the future, Journal of Busi…		Routledge	3	Theme 5: health care, mhealth, india, internet of things	health care, mhealth, india, internet of things	Q1	5	136	0.2703	0.3017	47.4706	0.1609	0	0.5	0.6316	0.2105	5.3761	0.3943	0.0957	0.3027	0.015	0.3605	Q3: Niche / Transient	Q4: Frontier / Niche
Barn S.S.	‘Tweet dreams are made of this, who are we to disagree?’ Adventures in a #Brave New World of #tweets, #Twitter, #student engagement and #excitement with #learning	2016	Journal of Marketing Management	11	10.1080/0267257X.2016.1159598	https://www.scopus.com/inward/record.uri?eid=2-s2.0-84964409705&doi=10.1080%2f0267257X.2016.1159598&partnerID=40&md5=e22b0df05a03436d7ea5b03383c9ba27	ABSTRACT: The paper contributes to the current debate for the need to develop creative assessment strategies designed to enhance greater collaboration and levels of engagement amongst diverse student groups lending itself to deeper learning in postgraduate marketing courses. Through an innovative use of social media (Twitter), students are encouraged to engage and comment on communication and adv…	assessment design; informal learning environment; social media; technology acceptance model; Twitter		Blessing S.B., Blessing J.S., Fleck B.K., Using Twitter to reinforce classroom concepts, Teaching of Psychology, 39, 4, pp. 268-271, (2012); Bober M., Twitter and TV events: An exploration of how to use social media for student-led research, Journal of Information Management, 66, 3, pp. 297-312, (2014); Brown S., Seeing Web 2.0 in context: A study of academic perceptions, TheInternet and Higher E…		Routledge	3	Theme 8: social media, social networking (online), knowledge, psychology	social media, social networking (online), knowledge, psychology	Q1	8	112	0.5845	0.1818	113.589	0.7384	0	0.5	0.2083	0.0694	5.2199	0.3385	0.096	0.3056	0.0183	0.4931	Q1: Core / Established	Q2: Mature / Potential
Wu M.; Jayawardhena C.; Hamilton R.	A comprehensive examination of internet banking user behaviour: evidence from customers yet to adopt, currently using and stopped using	2014	Journal of Marketing Management	17	10.1080/0267257X.2014.935459	https://www.scopus.com/inward/record.uri?eid=2-s2.0-84905372363&doi=10.1080%2f0267257X.2014.935459&partnerID=40&md5=ef0381d17203ef5e651d10c4e75a5c06	Despite the surge in interest in research on customers' adoption of internet banking (IB), how discontinued users can be brought back to IB has not received much attention. To respond to this question and to provide a comprehensive understanding of IB customer behaviour, we develop a conceptual model grounded on the extended technology acceptance model, and empirically validate it using a sample …	discontinued users; internet banking behaviour; partial least squares; perceived value; the technology acceptance model		Abu-Shanab E., Income divide: A determinant of technology acceptance, International Arab Journal of e-Technology, 3, pp. 121-127, (2013); Abushanab E., Pearson J.M., Internet banking in Jordan: The unified theory of acceptance and use of technology (UTAUT) perspective, Journal of Systems and Information Technology, 9, pp. 78-97, (2007); Ajzen I., From intentions to actions: A theory of planned be…		Routledge	3	Theme 8: social media, social networking (online), knowledge, psychology	social media, social networking (online), knowledge, psychology	Q1	8	112	0.5845	0.1818	113.589	0.7384	0	0.5	0.2083	0.0694	5.2199	0.3385	0.096	0.3056	0.0183	0.4931	Q1: Core / Established	Q2: Mature / Potential
Lederer M.; Kreuter J.	Organising the unthinkable in times of crises: Will climate engineering become the weapon of last resort in the Anthropocene?	2018	Organization	16	10.1177/1350508418759186	https://www.scopus.com/inward/record.uri?eid=2-s2.0-85050290717&doi=10.1177%2f1350508418759186&partnerID=40&md5=7728f595c163bcc1023a91d1b8907e87	In this article, we ask how the approaches of climate engineering – mostly highly technological approaches to address the challenge of global climate change – might be organised in the age of the Anthropocene. We understand the term ‘Anthropocene’ to be characterised by crisis, on one hand, and by promise, on the other. In particular, we aim to raise doubts on the dominant perspective on the orga…	Analogy; Anthropocene; carbon dioxide removal; climate change; climate engineering; crisis; geoengineering; nuclear technology; organisation; solar radiation management		Agamben G., State of Exception, (2005); Anderson K., Peters G., The Trouble with Negative Emissions. Reliance on Negative-Emission Concepts Locks in Humankind’s Carbon Addiction, Science, 354, (2016); Balzacq T., Constructivism and Securitization Studies, The Routledge Handbook of Security Studies, pp. 56-72, (2010); Banerjee B., The Limitations of Geoengineering Governance in a World of Uncertai…		SAGE Publications Ltd	3.1	Theme 2: china, investments, electric vehicle, electric vehicles	china, investments, electric vehicle, electric vehicles	Q1	2	462	0.2421	0.3314	47.0952	0.1576	0	0.5	0.4028	0.1343	6.843	0.9185	0.0957	0.3025	0.0068	0.0356	Q4: Emerging / Structural	Q4: Frontier / Niche
Islam S.; Hoque M.R.; Jamil M.A.A.	Predictors of users’ preferences for online health services	2020	Journal of Consumer Marketing	12	10.1108/JCM-05-2018-2689	https://www.scopus.com/inward/record.uri?eid=2-s2.0-85078905941&doi=10.1108%2fJCM-05-2018-2689&partnerID=40&md5=e173d80faff486040603ca216dfe0722	Purpose: The purpose of this study is to explain predictors that discriminate users’ preferences for online health services, focusing on a downtown area in a developing country. Design/methodology/approach: Drawing on rational choice theory (RCT), the authors test a model that links the frequency of online health service usage to access-activators and access-inhibitors. Multivariate analysis of v…	Discriminant analysis; eHealth; mHealth; Online health-care service quality; Rational choice theory; Transformative service research		Digital Bangladesh by 2021: govt. boasts of ICT success, a2i, 15 February, (2018); Ajzen I., The theory of planned behavior, Organizational Behavior and Human Decision Processes, 50, 2, pp. 179-211, (1991); Ajzen I., Fishbein M., Understanding Attitudes and Predicting Social Behavior, (1980); Akter S., Wamba S.F., D'Ambra J., Enabling a transformative service system by modeling quality dynamics, …		Emerald Group Holdings Ltd.	3.3	Theme 5: health care, mhealth, india, internet of things	health care, mhealth, india, internet of things	Q1	5	136	0.2703	0.3017	47.4706	0.1609	0	0.5	0.6316	0.2105	5.3761	0.3943	0.0957	0.3027	0.015	0.3605	Q3: Niche / Transient	Q4: Frontier / Niche
Nandi S.; Nandi M.L.; Khandker V.	Impact of perceived interactivity and perceived value on mobile app stickiness: an emerging economy perspective	2021	Journal of Consumer Marketing	13	10.1108/JCM-02-2020-3661	https://www.scopus.com/inward/record.uri?eid=2-s2.0-85114472269&doi=10.1108%2fJCM-02-2020-3661&partnerID=40&md5=83269a9e8b7316d53eb60867907508d5	Purpose: The purpose of this paper is to ascertain the determinants of mobile app stickiness (MASS) in emerging economies. Design/methodology/approach: The study proposes a research model about how perceived interactivity (PI), perceived value, flow and self-efficacy influence MASS. The proposed model is then assessed in partial least square structural equation modeling using a survey sample of 5…	Human device interaction; Mobile app stickiness; Mobile commerce; Perceived interactivity; Perceived value		Ajzen I., Perceived behavioral control, self-efficacy, locus of control, and the theory of planned behaviour, Journal of Applied Social Psychology, 32, 4, pp. 665-683, (2002); Alalwan A.A., Algharabat R.S., Baabdullah A.M., Rana N.P., Qasem Z., Dwivedi Y.K., Examining the impact of mobile interactivity on customer engagement in the context of mobile shopping, Journal of Enterprise Information Man…		Emerald Group Holdings Ltd.	3.3	Theme 8: social media, social networking (online), knowledge, psychology	social media, social networking (online), knowledge, psychology	Q1	8	112	0.5845	0.1818	113.589	0.7384	0	0.5	0.2083	0.0694	5.2199	0.3385	0.096	0.3056	0.0183	0.4931	Q1: Core / Established	Q2: Mature / Potential
Kulviwat S.; Bruner G.C., II; Neelankavil J.P.	Self-efficacy as an antecedent of cognition and affect in technology acceptance	2014	Journal of Consumer Marketing	75	10.1108/JCM-10-2013-0727	https://www.scopus.com/inward/record.uri?eid=2-s2.0-84927521430&doi=10.1108%2fJCM-10-2013-0727&partnerID=40&md5=3c50bc61950ebc5086731658466e12fc	Purpose – This paper aims to examine whether self-efficacy plays an important role in shaping the effect of cognition and affects in high technology adoption. It also examines whether cognition and affect mediate the effect of self-efficacy on attitude toward adoption. Design/methodology/approach – Using an experimental survey to collect data, subjects performed two different tasks (utilitarian a…	Affect; Cognition; High-tech innovations; Self-efficacy; Technology acceptance		Agarwal R., Sambamurthy V., Stair R., The evolving relationships between general and specific computer self-efficacy: An empirical assessment, Information Systems Research, 11, 4, pp. 418-430, (2000); Ajzen I., Perceived behavioral control, self-efficacy, locus of control, and the theory of planned behavior, Journal of Applied Social Psychology, 32, 4, pp. 665-683, (2002); Anderson J., Gerbing D.…		Emerald Group Holdings Ltd.	3.3	Theme 8: social media, social networking (online), knowledge, psychology	social media, social networking (online), knowledge, psychology	Q1	8	112	0.5845	0.1818	113.589	0.7384	0	0.5	0.2083	0.0694	5.2199	0.3385	0.096	0.3056	0.0183	0.4931	Q1: Core / Established	Q2: Mature / Potential
Gao T.T.; Sultan F.; Rohm A.J.	Factors influencing Chinese youth consumers' acceptance of mobile marketing	2010	Journal of Consumer Marketing	56	10.1108/07363761011086326	https://www.scopus.com/inward/record.uri?eid=2-s2.0-78349278398&doi=10.1108%2f07363761011086326&partnerID=40&md5=4b5c6ad1adedc411649bb139ce34b579	Purpose – The purpose of this paper is to examine factors affecting consumers' acceptance of mobile marketing in China. Design/methodology/approach – The authors draw on technology acceptance and uses and gratifications theories to develop a conceptual model of antecedent factors (including risk acceptance related to the mobile platform and personal attachment related to mobile devices) and marke…	China; China; Communication technologies; Consumer behaviour; Marketing communications; Mobile communication systems; Young adults		Anderson J.C., An approach for confirmatory measurement and structural equation modeling of organizational properties, Management Science, 33, 4, pp. 525-541, (1987); Anderson J.C., Gerbing D.W., Structural equation modeling in practice: a review and recommended two-step approach, Psychological Bulletin, 103, 3, pp. 411-423, (1988); Bagozzi R.P., Yi Y., On the evaluation of structural equation mo…			3.3	Theme 2: china, investments, electric vehicle, electric vehicles	china, investments, electric vehicle, electric vehicles	Q1	2	462	0.2421	0.3314	47.0952	0.1576	0	0.5	0.4028	0.1343	6.843	0.9185	0.0957	0.3025	0.0068	0.0356	Q4: Emerging / Structural	Q4: Frontier / Niche
Cho H.; Wang Y.	Cultural comparison for the acceptance of online apparel customization	2010	Journal of Consumer Marketing	12	10.1108/07363761011078299	https://www.scopus.com/inward/record.uri?eid=2-s2.0-77957303440&doi=10.1108%2f07363761011078299&partnerID=40&md5=4644469e95387b46b43d769fc29abcba	Purpose: The aim of this paper is to examine two culturally different countries regarding the acceptance of online customization of an apparel product. Design/methodology/approach: Based on previous literature, this study established hypotheses to compare US and Taiwan college students for their acceptance of online apparel customization. Hypotheses were tested by employing multigroup structural …	China; Customization; International marketing; National cultures; Retailing; United States of America		Ajzen I., Fishbein M., Understanding Attitudes and Predicting Social Behavior, (2002); Barua A.C., Whinston A.B., Creating a collaborator in cyberspace: Theoretical foundation and an implementation, Journal of Organizational Computing, 5, 4, pp. 417-442, (1996); Chau P.Y.K., Hu P.J., Lee B.L.P., Au A.K.K., Examining customers' trust in online vendors and their dropout decisions: An empirical stud…			3.3	Theme 2: china, investments, electric vehicle, electric vehicles	china, investments, electric vehicle, electric vehicles	Q1	2	462	0.2421	0.3314	47.0952	0.1576	0	0.5	0.4028	0.1343	6.843	0.9185	0.0957	0.3025	0.0068	0.0356	Q4: Emerging / Structural	Q4: Frontier / Niche
Nysveen H.; Thorbjørnsen H.	Explaining intention to use mobile chat services: moderating effects of gender	2005	Journal of Consumer Marketing	422	10.1108/07363760510611671	https://www.scopus.com/inward/record.uri?eid=2-s2.0-24144493096&doi=10.1108%2f07363760510611671&partnerID=40&md5=4429398d85d6713521ee435cae421ebf	Purpose In this article the authors aim to investigate the moderating effects of gender in explaining intention to use mobile chat services. Design/methodology/approach An extended adoption model based on the technology acceptance model and theory of reasoned action is applied for pin-pointing the antecedents of intention to use mobile chat services and for revealing cross-gender differences. The…	Gender; Market segmentation; Mobile communication systems; User studies		Agarwal R., Karahanna E., Times flies when you're having fun: cognitive absorption and beliefs about information technology usage, MIS Quarterly, 24, 4, pp. 665-694, (2000); Ajzen I., From intentions to actions: a theory of planned behavior”, in, Action Control: From Cognition to Behavior, (1985); Arbuckle J.L., Wothke W., Amos 4.0 User's Guide, (1999); Balasubramanian S., Peterson R.A., Jarvenpa…			3.3	Theme 10: retailing, mobile phone, shopping activity, social influence	retailing, mobile phone, shopping activity, social influence	Q1	10	90	0.5901	0.2244	68.1556	0.3416	0	0.5	0.0526	0.0175	4.2725	0	0.1463	0.8713	0.0249	0.75	Q1: Core / Established	Q1: Emerging / Growth
McCorkindale T.; Morgoch M.	An analysis of the mobile readiness and dialogic principles on Fortune 500 mobile websites	2013	Public Relations Review	23	10.1016/j.pubrev.2013.03.008	https://www.scopus.com/inward/record.uri?eid=2-s2.0-84878351576&doi=10.1016%2fj.pubrev.2013.03.008&partnerID=40&md5=0265ed5c68a6540ba8967735d6a361bf	With the rise in mobile technologies, companies must be aware of how various stakeholders are using their websites through their mobile devices. Using a content analysis, this study analyzed the five dialogic principles of Fortune 500 websites accessed from mobile phones and also assessed their mobile readiness. While most companies did not have mobile websites, more non-mobile websites featured …	Dialogic theory; Fortune; Mobile; Smartphones; Social media; Websites		Bravo J., Villarreal V., Hervas R., Urzaiz G., Using a communication model to collect measurement data through mobile devices, Sensors, 12, 7, pp. 9253-9272, (2012); Campbell S.W., Kwak N., Mobile communication and strong network ties: Shrinking or expanding spheres of public discourse?, New Media and Society, 14, 2, pp. 262-280, (2012); (2012); (2012); Kent M., The dialogic turn in public relati…			3.4	Theme 8: social media, social networking (online), knowledge, psychology	social media, social networking (online), knowledge, psychology	Q1	8	112	0.5845	0.1818	113.589	0.7384	0	0.5	0.2083	0.0694	5.2199	0.3385	0.096	0.3056	0.0183	0.4931	Q1: Core / Established	Q2: Mature / Potential
Curtis L.; Edwards C.; Fraser K.L.; Gudelsky S.; Holmquist J.; Thornton K.; Sweetser K.D.	Adoption of social media for public relations by nonprofit organizations	2010	Public Relations Review	269	10.1016/j.pubrev.2009.10.003	https://www.scopus.com/inward/record.uri?eid=2-s2.0-74449087370&doi=10.1016%2fj.pubrev.2009.10.003&partnerID=40&md5=35be227f96da17494991c9269ee72ad6	This survey of nonprofit public relations practitioners (N = 409) applied the Unified Theory of Acceptance and Use of Technology (UTAUT). Findings indicate that women consider social media to be beneficial, whereas men exhibit more confidence in actively utilizing social media. Organizations with specified public relations departments were more likely to adopt social media. Positive correlations …	Adoption; Internet; Nonprofit; Online; Social media		Eyrich N., Padman M.L., Sweetser K.D., PR practitioners' use of social media tools and communication technology, Public Relations Review, 34, pp. 412-414, (2008); Johnson T.J., Kaye B.K., Wag the blog: How reliance on traditional media and the Internet influence credibility perceptions of weblogs among blog users, Journalism & Mass Communication Quarterly, 81, pp. 622-642, (2004); Lariscy R.W., A…			3.4	Theme 8: social media, social networking (online), knowledge, psychology	social media, social networking (online), knowledge, psychology	Q1	8	112	0.5845	0.1818	113.589	0.7384	0	0.5	0.2083	0.0694	5.2199	0.3385	0.096	0.3056	0.0183	0.4931	Q1: Core / Established	Q2: Mature / Potential
Vahdat A.; Alizadeh A.; Quach S.; Hamelin N.	Would you like to shop via mobile app technology? The technology acceptance model, social factors and purchase intention	2021	Australasian Marketing Journal	121	10.1016/j.ausmj.2020.01.002	https://www.scopus.com/inward/record.uri?eid=2-s2.0-85078051320&doi=10.1016%2fj.ausmj.2020.01.002&partnerID=40&md5=f2efaeb12122aad9a700e9d026ca3b7b	This study investigates how technology acceptance model (TAM) factors and social factors determine customer purchase intention. Although previous studies on mobile apps have investigated TAM, critical social factors have been neglected, thus, reinforcing the need to study the latter’s contribution to consumer purchase intention. Accordingly, this study examines social influence and peer influence…	Attitude towards mobile app use; Peer influence; Perceived ease of use; Perceived usefulness; Purchase intention; Social influence		Ajzen I., The theory of planned behavior, Organ. Behav. Hum. Decis. Process, 50, 2, pp. 179-211, (1991); Alnawas I., Aburub F., The effect of benefits generated from interacting with branded mobile apps on consumer satisfaction and purchase intentions, J. Retail. Consum. Serv, 31, pp. 313-322, (2016); Amoroso D., Ackaradejruangsri P., How consumer attitudes improve repurchase intention, Int. J. E…		SAGE Publications Ltd	3.8	Theme 8: social media, social networking (online), knowledge, psychology	social media, social networking (online), knowledge, psychology	Q1	8	112	0.5845	0.1818	113.589	0.7384	0	0.5	0.2083	0.0694	5.2199	0.3385	0.096	0.3056	0.0183	0.4931	Q1: Core / Established	Q2: Mature / Potential
Wells P.; De Lange P.; Fieger P.	Integrating a virtual learning environment into a second-year accounting course: Determinants of overall student perception	2008	Accounting and Finance	57	10.1111/j.1467-629X.2007.00249.x	https://www.scopus.com/inward/record.uri?eid=2-s2.0-49649127166&doi=10.1111%2fj.1467-629X.2007.00249.x&partnerID=40&md5=46aee1531ae446b627e930324d4aa5c3	Rapid acceptance of, and changes in, information technology are revolutionizing the way educators teach and students learn. This study reports on the use of Blackboard as a tool for creating a virtual learning environment (VLE). Responses from undergraduate accounting students in New Zealand provide data on the use of the VLE as a learning aid. Findings suggest that the students have openly embra…	Internet; Online learning; Student perceptions		Objectives of education for accountants: Position statement number one, Issues in Accounting Education, 5, pp. 307-312, (1990); Adler R.W., Milne M.J., Stringer C.P., Identifying and overcoming obstacles to learner-centred approaches in tertiary accounting education: A field study and survey of accounting educators' perceptions, Accounting Education, 9, pp. 113-134, (2000); Future accounting educ…			3.3	Not Clustered (Low Keyword Overlap)		Q1	-1	0	0	0	0	0	0	0	0	0	0	0	0	0	0	0
Wulandari S.S.; Ali S.	Incorporating XBRL topics into the accounting curriculum: empirical evidence from Indonesia	2019	Accounting Education	6	10.1080/09639284.2019.1679205	https://www.scopus.com/inward/record.uri?eid=2-s2.0-85074327430&doi=10.1080%2f09639284.2019.1679205&partnerID=40&md5=3640fa3df3b64e306c71ea71de51c228	Although the eXtensible Business Reporting Language (XBRL) can improve the utilization of accounting information, the acceptance of this technology has been slower than anticipated. Some studies suggest that education can raise awareness of XBRL, thus improving its adoption in a country. This study describes the perspectives of accounting lecturers in Indonesia regarding XBRL and examines their i…	education; Indonesia; modified TAM 3 model; XBRL		Al-Samarrai S., Local governance and education performance: A survey of the quality of local education governance in 50 Indonesian districts (Vol. 2): Main report (English), (2013); Alzahrani A.I., Mahmud I., Ramayah T., Alfarraj O., Alalwan N., Extending the theory of planned behavior (TPB) to explain online game playing among Malaysian undergraduate students, Telematics and Informatics, 34, 4, …		Routledge	2.8	Theme 6: engineering education, agriculture, agricultural technology, learning	engineering education, agriculture, agricultural technology, learning	Q1	6	40	0.5182	0.4089	29.05	0	0	0.5	0.25	0.0833	4.5398	0.0955	0.1522	0.9384	0.0312	1	Q1: Core / Established	Q1: Emerging / Growth
Damerji H.; Salimi A.	Mediating effect of use perceptions on technology readiness and adoption of artificial intelligence in accounting	2021	Accounting Education	58	10.1080/09639284.2021.1872035	https://www.scopus.com/inward/record.uri?eid=2-s2.0-85100080365&doi=10.1080%2f09639284.2021.1872035&partnerID=40&md5=09ecb30542494d5399b10cba13bc4254	The use of Artificial Intelligence (AI) is growing rapidly in accounting practice, and firms desire new hires who have adopted this technology. Universities can prepare students to adopt AI. The purpose of this quantitative study was to examine whether perceived ease of use (PEOU) and perceived usefulness (PU) have an effect on the relationship between accounting students’ level of technology rea…	accounting; accounting education; Artificial intelligence; audit innovation; auditing; process mediation; technology acceptance; technology adoption; technology readiness; technology use perceptions		September), (2015); Albrecht W., Sack R., The perilous future of accounting education, CPA Journal, 71, 3, pp. 16-23, (2001); Awayiga J., Onumah J., Tsamenyi M., Knowledge and skills development of accounting graduates: The perceptions of graduates and employers in Ghana, Accounting Education, 19, 1-2, pp. 139-158, (2010); Bizarro P.A., Dorian M., Artificial intelligence: The future of auditing, …		Routledge	2.8	Theme 1: artificial intelligence, automation, industry 4.0, research and development	artificial intelligence, automation, industry 4.0, research and development	Q1	1	634	0.183	0.6936	48.683	0.1715	0	0.5	3	1	7.0711	1	0.1031	0.386	0.0059	0	Q4: Emerging / Structural	Q4: Frontier / Niche
Schuster L.; Proudfoot J.; Drennan J.	Understanding consumer loyalty to technology-based self-services with credence qualities	2015	Journal of Services Marketing	16	10.1108/JSM-01-2015-0021	https://www.scopus.com/inward/record.uri?eid=2-s2.0-84942101679&doi=10.1108%2fJSM-01-2015-0021&partnerID=40&md5=976504a62f5be9d888d0d48bbd7a57cb	Purpose – This paper aims to use the Model of Goal-Directed Behavior (MGB) to examine the factors affecting consumers’ continued use of emerging technology-based self-services (TBSSs) with credence qualities. Professional services, which traditionally require specialized knowledge and high levels of interpersonal interaction to produce owing to their credence qualities, are increasingly delivered…	Continued use; Credence qualities; mHealth; Model of Goal-Directed Behavior; Technology-based self-service		Adelman M., Ahuvia A., Social support in the service sector: the antecedents, processes, and outcomes of social support in an introductory service, Journal of Business Research, 32, 3, pp. 273-282, (1995); Ajzen I., The theory of planned behavior, Organizational Behavior and Human Decision Processes, 50, 2, pp. 179-211, (1991); Anderson R.E., Srinivasan S.S., E-satisfaction and e-loyalty: a conti…		Emerald Group Holdings Ltd.	4.5	Theme 5: health care, mhealth, india, internet of things	health care, mhealth, india, internet of things	Q1	5	136	0.2703	0.3017	47.4706	0.1609	0	0.5	0.6316	0.2105	5.3761	0.3943	0.0957	0.3027	0.015	0.3605	Q3: Niche / Transient	Q4: Frontier / Niche
Lee Y.; In J.; Lee S.J.	Social media engagement, service complexity, and experiential quality in US hospitals	2020	Journal of Services Marketing	14	10.1108/JSM-09-2019-0359	https://www.scopus.com/inward/record.uri?eid=2-s2.0-85085350497&doi=10.1108%2fJSM-09-2019-0359&partnerID=40&md5=b471916c5abb22cbf785452c3ae93913	Purpose: As social media platforms become increasingly popular among service firms, many US hospitals have been using social media as a means to improve their patients’ experiences. However, little research has explored the implications of social media use within a hospital context. The purpose of this paper is to investigate a hospital’s customer engagement through social media and its associati…	Customer engagement; Health services; Service operations; Social media		Angst C.M., Agarwal R., Sambamurthy V., Kelley K., Social contagion and information technology diffusion: the adoption of electronic medical records in US hospitals, Management Science, 56, 8, pp. 1219-1241, (2010); Angst C.M., Devaraj S., Queenan C.C., Greenwood B., Performance effects related to the sequence of integration of healthcare technologies, Production and Operations Management, 20, 3,…		Emerald Group Holdings Ltd.	4.5	Theme 5: health care, mhealth, india, internet of things	health care, mhealth, india, internet of things	Q1	5	136	0.2703	0.3017	47.4706	0.1609	0	0.5	0.6316	0.2105	5.3761	0.3943	0.0957	0.3027	0.015	0.3605	Q3: Niche / Transient	Q4: Frontier / Niche
Paluch S.; Tuzovic S.	Persuaded self-tracking with wearable technology: carrot or stick?	2019	Journal of Services Marketing	25	10.1108/JSM-03-2018-0091	https://www.scopus.com/inward/record.uri?eid=2-s2.0-85067275671&doi=10.1108%2fJSM-03-2018-0091&partnerID=40&md5=a27e7ff5f6d200ad2eb4ba7915a311a8	Purpose: Commercial entities (e.g. health and life insurance, airlines and supermarkets) in different countries have recently begun to introduce wearable technology as part of the consumer journey and as a means of enhancing the business value chain. While a firm’s decision to adopt such new technologies as wearable devices is often based on financial factors such as return on investment, costs a…	Fitness tracker; Health insurance; Self-tracking; Smart services; Wearable technology		Accenture technology vision for insurance 2015 – digital insurance era: stretch your boundaries, (2015); Ajzen I., The theory of planned behavior, Organizational Behavior and Human Decision Processes, 50, 2, pp. 179-211, (1991); Arnow G., Apple watch-ing you: why wearable technology should be federally regulated, Loyola of Los Angeles Law Review, 49, 3, pp. 607-633, (2017); Bazeley P., Jackson K.…		Emerald Group Holdings Ltd.	4.5	Theme 5: health care, mhealth, india, internet of things	health care, mhealth, india, internet of things	Q1	5	136	0.2703	0.3017	47.4706	0.1609	0	0.5	0.6316	0.2105	5.3761	0.3943	0.0957	0.3027	0.015	0.3605	Q3: Niche / Transient	Q4: Frontier / Niche
Talukder M.; Aroos-Sheriffdeen S.; Khan M.I.; Quazi A.; Abdullah A.B.M.	Usage behavior of mHealth service users in Australia: do user demographics matter?	2023	Journal of Services Marketing	0	10.1108/JSM-08-2021-0287	https://www.scopus.com/inward/record.uri?eid=2-s2.0-85149335412&doi=10.1108%2fJSM-08-2021-0287&partnerID=40&md5=dedef56cf5ceba7244273bca7183cb7c	Purpose: Mobile health (mHealth) service is an Australian Government initiative aiming to improve the quality of health-care services. However, little is known about Australian health consumers’ willingness to adopt mHealth. The purpose of this paper is to study the usage behavior of mHealth service users in Australia. While various factors may impact users’ willingness to accept mHealth, this re…	mHealth; mHealth service product; Mobile health services; TAM; Usage behavior		Abu-Shanab E.A., Education level as a technology adoption moderator, 2011 3rd International Conference on Computer Research and Development, 1, pp. 324-328, (2011); Adjzen I., Fishbein M., Understanding Attitudes and Predicting Social Behaviour, (1980); Afthinos Y., Theodorakis N.D., Nassis P., Customers’ expectations of service in Greek fitness centers: gender, age, type of sport center, and mot…		Emerald Publishing	4.5	Theme 5: health care, mhealth, india, internet of things	health care, mhealth, india, internet of things	Q1	5	136	0.2703	0.3017	47.4706	0.1609	0	0.5	0.6316	0.2105	5.3761	0.3943	0.0957	0.3027	0.015	0.3605	Q3: Niche / Transient	Q4: Frontier / Niche
Singh N.; Fassott G.; Chao M.C.H.; Hoffmann J.A.	Understanding international web site usage: A cross-national study of German, Brazilian, and Taiwanese online consumers	2006	International Marketing Review	115	10.1108/02651330610646304	https://www.scopus.com/inward/record.uri?eid=2-s2.0-33644512776&doi=10.1108%2f02651330610646304&partnerID=40&md5=46194a7087404c00042dda4dc0d78c40	Purpose - The technology acceptance model (TAM) has been one of the most influential theories in the information technology literature, but it has not been used in the marketing literature to understand consumer acceptance of international web sites. Thus, the purpose of this study is to use TAM to study international consumers' acceptance and use of MNEs web sites designed specifically for their…	Brazil; Consumer behaviour; Electronic commerce; Germany; Internet shopping; Taiwan		Aaker L.J., Mahaeswaran D., The effect of cultural orientation on persuasion, Journal of Consumer Research, 24, pp. 315-28, (1997); Al-Gahtani S., The applicability of TAM outside North America: An empirical test in the United Kingdom, Information Resources Management Journal, pp. 37-46, (2001); Chen L.D., Wells W.D., Attitude toward the site, Journal of Advertising Research, 39, 5, pp. 27-38, (1…			4.6	Theme 2: china, investments, electric vehicle, electric vehicles	china, investments, electric vehicle, electric vehicles	Q1	2	462	0.2421	0.3314	47.0952	0.1576	0	0.5	0.4028	0.1343	6.843	0.9185	0.0957	0.3025	0.0068	0.0356	Q4: Emerging / Structural	Q4: Frontier / Niche
Poon P.S.; Evangelista F.U.; Albaum G.	A comparative study of the management styles of marketing managers in Australia and the People's Republic of China	2005	International Marketing Review	18	10.1108/02651330510581163	https://www.scopus.com/inward/record.uri?eid=2-s2.0-18844397037&doi=10.1108%2f02651330510581163&partnerID=40&md5=dc1c732c50739cee4460a3eb0e84cc27	Purpose - The objective of this paper is to compare the management style of marketing managers in Australia with the counterparts in the People's Republic of China (PRC). Design/methodology/approach - Based on the differences in cultural dimensions and context, five hypotheses related to management decision-making styles were developed and tested by questionnaire survey. Sixty seven valid Austral…	Australia; China; International marketing; Management styles; Marketing decision making; National cultures		Abramson N.R., Lane H.W., Nagai H., Takagi H., A comparison of Canadian and Japanese cognitive styles: Implications for management interaction, Journal of International Business Studies, 24, 3, pp. 575-588, (1993); Adler N., Cross-cultural management research: The ostrich and the trend, Academy of Management Review, 8, 2, pp. 226-232, (1983); Albaum G., Herche J., Management style comparisons amo…			4.6	Theme 2: china, investments, electric vehicle, electric vehicles	china, investments, electric vehicle, electric vehicles	Q1	2	462	0.2421	0.3314	47.0952	0.1576	0	0.5	0.4028	0.1343	6.843	0.9185	0.0957	0.3025	0.0068	0.0356	Q4: Emerging / Structural	Q4: Frontier / Niche
Di Benedetto C.A.; Calantone R.J.; Zhang C.	International technology transfer: Model and exploratory study in the People's Republic of China	2003	International Marketing Review	75	10.1108/02651330310485171	https://www.scopus.com/inward/record.uri?eid=2-s2.0-3242721615&doi=10.1108%2f02651330310485171&partnerID=40&md5=7c96520384cd94c3a7dedbeb651c4400	Adoption of foreign-developed technology by firms in developing nations will accelerate the speed by which they become globally competitive in new product development. In this study, we build and empirically test an extension of the technology acceptance model (TAM) - the "extended TAM" - applied to the study of international transfer of product technology. The extended TAM model derives from the…	Behaviour; China; Product technology; Transfer processes		Adams D.A., Nelson R.R., Todd P.A., Perceived usefulness, ease of use, and usage of information technology: A replication, MIS Quarterly, 16, 2, pp. 227-47, (1992); Adler N.J., Understanding the ways of understanding: Cross-cultural management methodology reviewed, Advances in International Comparative Management, pp. 31-67, (1984); Ajzen I., Fishbein M., Attitude-behavior relations: A theoretica…			4.6	Theme 2: china, investments, electric vehicle, electric vehicles	china, investments, electric vehicle, electric vehicles	Q1	2	462	0.2421	0.3314	47.0952	0.1576	0	0.5	0.4028	0.1343	6.843	0.9185	0.0957	0.3025	0.0068	0.0356	Q4: Emerging / Structural	Q4: Frontier / Niche
Adam M.S.; Urquhart C.	No man is an island: Social and human capital in IT capacity building in the Maldives	2009	Information and Organization	27	10.1016/j.infoandorg.2007.11.002	https://www.scopus.com/inward/record.uri?eid=2-s2.0-58549107019&doi=10.1016%2fj.infoandorg.2007.11.002&partnerID=40&md5=635399896c48d8e8f20954573c927e64	In many developing countries, lack of IT skills and human capital impede the potential of IT investments in organizations in developing countries [Lee, J. (2001). Education for technology readiness: Prospects for developing countries. Journal of Human Development, 2(1), 115-151]. This paper draws upon theories of human and social capital, and knowledge, to explain enablers/obstacles for knowledge…	Human capital; IT and capacity building; Knowledge management; Social capital; Training		Al-Jayyousi O., Capacity building for desalination in Jordan: Necessary conditions for sustainable water management, Desalination, 141, pp. 169-179, (2001); Avgerou C., Walsham G., Information technology in context: Studies from the perspective of developing countries, (2000); Bhatnagar S.C., Bjorn-Andersen N., Information technology in developing countries, (1990); Bhatnagar S.C., Odedra M., Soc…			4.7	Theme 2: china, investments, electric vehicle, electric vehicles	china, investments, electric vehicle, electric vehicles	Q1	2	462	0.2421	0.3314	47.0952	0.1576	0	0.5	0.4028	0.1343	6.843	0.9185	0.0957	0.3025	0.0068	0.0356	Q4: Emerging / Structural	Q4: Frontier / Niche
Zaidan E.	Analysis of ICT usage patterns, benefits and barriers in tourism SMEs in the Middle Eastern countries: The case of Dubai in UAE	2017	Journal of Vacation Marketing	31	10.1177/1356766716654515	https://www.scopus.com/inward/record.uri?eid=2-s2.0-85021895145&doi=10.1177%2f1356766716654515&partnerID=40&md5=0cfd261825b395696957466f62a580d4	Information and communications technology (ICT) are widely used by enterprises to enhance their competitiveness. Travel agents (TAs) are among service providers for whom their integration of ICT and Internet technological capabilities could be the best marketing device and a potential promoter for enhancing their competitive positioning in the tourism sector. The study contextualizes ICT usage pa…	and e-commerce; Dubai; Internet adoption; marketing; tourism; tourism SMEs; travel agencies		Abou-Shouk M., Lim W.M., Megicks P., Internet adoption by travel agents: a case of Egypt, International Journal of Tourism Research, 15, pp. 298-312, (2013); Al-Allak B., Evaluating the adoption and use of Internet-based marketing information systems to improve marketing intelligence (The case of tourism SMEs in Jordan), International Journal of Marketing Studies, 2, 2, pp. 87-101, (2010); Zaidan…		SAGE Publications Ltd	5	Theme 9: virtual reality, tourism, travel behavior, tourist destination	virtual reality, tourism, travel behavior, tourist destination	Q1	9	131	0.615	0.2999	73.1527	0.3852	0	0.5	0.4167	0.1389	4.9732	0.2504	0.1577	1	0.0208	0.5899	Q1: Core / Established	Q1: Emerging / Growth
Sancho-Esper F.; Ostrovskaya L.; Rodriguez-Sanchez C.; Campayo-Sanchez F.	Virtual reality in retirement communities: Technology acceptance and tourist destination recommendation	2023	Journal of Vacation Marketing	9	10.1177/13567667221080567	https://www.scopus.com/inward/record.uri?eid=2-s2.0-85125943735&doi=10.1177%2f13567667221080567&partnerID=40&md5=192a6f7d2f71451c1d800a0c1478e2a1	Despite the importance of analysing virtual reality (VR) technology acceptance by older adults and investigating the use of this technology as a marketing tool to enhance destination tourism word of mouth (WOM), no study seems to have addressed these issues. Thus, this study explores how the technology acceptance model (TAM) and anxiety regarding the use of VR after virtually visiting a tourist d…	destination recommendation; mixed methods; older adults; partial least squares; technology acceptance; Virtual reality		Abubakar A.M., Ilkan M., Impact of online WOM on destination trust and intention to travel: A medical tourism perspective, Journal of Destination Marketing & Management, 5, 3, pp. 192-201, (2016); Ajzen I., Fishbein M., Understanding Attitudes and Predicting Social Behavior, (1980); Bailey P.E., Slessor G., Rieger M., Et al., Trust and trustworthiness in young and older adults, Psychology and Agi…		SAGE Publications Ltd	5	Theme 9: virtual reality, tourism, travel behavior, tourist destination	virtual reality, tourism, travel behavior, tourist destination	Q1	9	131	0.615	0.2999	73.1527	0.3852	0	0.5	0.4167	0.1389	4.9732	0.2504	0.1577	1	0.0208	0.5899	Q1: Core / Established	Q1: Emerging / Growth
Chang H.H.	Virtual reality, YouTube, or social media? Assessing promotional effects on tourism destination	2022	Journal of Vacation Marketing	15	10.1177/13567667211038960	https://www.scopus.com/inward/record.uri?eid=2-s2.0-85117814592&doi=10.1177%2f13567667211038960&partnerID=40&md5=21450e81d9dd2e8c1a77aebd7a7bdcaa	This study investigated how virtual reality affects the tourism image and flow experience compared with YouTube videos and Facebook and travel pages and examined the moderating effect of the acceptance of new technologies on the relationship between tourism marketing effects and different communication tools. The virtual reality group exhibited higher levels of advertisement effects, tourism imag…	acceptance of new technologies; destination image; flow experience; Virtual reality		Agarwal R., Karahanna E., Time flies when you’re having fun: Cognitive absorption and beliefs about information technology usage, MIS Quarterly, 24, 4, pp. 665-694, (2000); Aziz A., Zainol N.A., Destination image: An overview and summary of selected research, International Journal of Leisure and Tourism Marketing, 2, 1, pp. 39-55, (2011); Baker M.J., Cameron E., Critical success factors in destin…		SAGE Publications Ltd	5	Theme 9: virtual reality, tourism, travel behavior, tourist destination	virtual reality, tourism, travel behavior, tourist destination	Q1	9	131	0.615	0.2999	73.1527	0.3852	0	0.5	0.4167	0.1389	4.9732	0.2504	0.1577	1	0.0208	0.5899	Q1: Core / Established	Q1: Emerging / Growth
Özekici Y.K.; Küçükergin K.G.	The role of COVID-19 anxiety and social contact within technology readiness and acceptance model for virtual reality	2023	Journal of Vacation Marketing	8	10.1177/13567667221109268	https://www.scopus.com/inward/record.uri?eid=2-s2.0-85132741067&doi=10.1177%2f13567667221109268&partnerID=40&md5=6949492d129ef1fb60f5a7e46307d967	This research aims to question the current threats posed by COVID-19 anxiety and the concept of social contact brought up by the pandemic, with the goal of extending the TRAM model within the context of tourism and virtual reality (VR). The sample of the study comprises of 300 participants taking part in a touristic activity within the last year and experiencing the lockdown period. Partial Least…	COVID-19 anxiety; social contact; TAM; TRAM; TRI; virtual reality		Ajzen I., Fishbein M., Attitude-behavior relations: a theoretical analysis and review of empirical research, Psychological Bulletin, 84, 5, pp. 888-918, (1977); Alberts N.M., Et al., The short health anxiety inventory: a systematic review and meta-analysis, Journal of Anxiety Disorders, 27, 1, pp. 68-78, (2013); Amin K.P., Griffiths M.D., Dsouza D.D., Online gaming during the COVID-19 pandemic in…		SAGE Publications Ltd	5	Theme 9: virtual reality, tourism, travel behavior, tourist destination	virtual reality, tourism, travel behavior, tourist destination	Q1	9	131	0.615	0.2999	73.1527	0.3852	0	0.5	0.4167	0.1389	4.9732	0.2504	0.1577	1	0.0208	0.5899	Q1: Core / Established	Q1: Emerging / Growth
Bradley R.V.; Byrd T.A.; Pridmore J.L.; Thrasher E.; Pratt R.M.E.; Mbarika V.W.A.	An empirical examination of antecedents and consequences of IT governance in US hospitals	2012	Journal of Information Technology	74	10.1057/jit.2012.3	https://www.scopus.com/inward/record.uri?eid=2-s2.0-84861553244&doi=10.1057%2fjit.2012.3&partnerID=40&md5=a1335b4675054c7773731f8853f4ead7	Intense pressure to control costs and improve patient care quality is driving hospitals to increasingly look to information technology (IT) for solutions. As IT investment and IT capability have grown in hospitals, the need to manage IT resources aggressively has also increased. The rise in complexity and sophistication of the IT capability in hospitals has also increased the importance of IT gov…	health care; IT capability; IT governance; IT value creation; power and politics; risk management	Health care; Hospitals; Investments; Risk management; Control costs; Empirical data; Empirical examination; High velocity; IT Capabilities; IT governance; IT investments; IT performance; IT resources; IT value creation; Patient care; power and politics; Relational mechanisms; Survey data; Information technology	Alexopoulos C., Goldsman D., Fontanesi J., Sawyer M., De Guire M., Kopald D., Holcomb K., A discrete-event simulation application for clinics serving the poor, Winter Simulation Conference Proceedings, 2, pp. 1386-1391, (2001); Allaire Y., Firsirotu M.E., Theories of organizational culture, Organization Studies, 5, 3, pp. 193-226, (1984); Armstrong C.P., Sambamurthy V., Information technology ass…			5.4	Theme 5: health care, mhealth, india, internet of things	health care, mhealth, india, internet of things	Q1	5	136	0.2703	0.3017	47.4706	0.1609	0	0.5	0.6316	0.2105	5.3761	0.3943	0.0957	0.3027	0.015	0.3605	Q3: Niche / Transient	Q4: Frontier / Niche
Campbell-Kelly M.; Garcia-Swartz D.D.	The history of the internet: The missing narratives	2013	Journal of Information Technology	48	10.1057/jit.2013.4	https://www.scopus.com/inward/record.uri?eid=2-s2.0-84875173923&doi=10.1057%2fjit.2013.4&partnerID=40&md5=81ca952877e81f2f48edb153f567083c	The origins of the Internet are only partially understood. It is often believed that the Internet grew as a tree from a tiny acorn, the ARPANET network set up in 1969. In this study, we argue that this interpretation is incomplete at best and seriously flawed at worst. Our article makes three contributions. First, on the basis of a wide variety of primary and secondary sources we reconstruct the …	computer networks; history of the Internet; information systems	Computer networks; Information systems; World Wide Web; Arpanet; Dominant design; Economic framework; Network effects; Secondary sources; Tipping point; Transmission control protocol/internet protocols; Various technologies; Internet protocols	Abbate J., Inventing the Internet, (1999); Abbate J., Government business, and the making of the internet, Business History Review, 75, 1, pp. 147-176, (2001); Aboba B., The online user's encyclopedia: Bulletin boards and beyond, reading addison-wesley, AOL, pp. 1990-1996, (1993); Bardini T., Bootstrapping: Douglas Englebart Coevolution, and the Origins of Personal Computing, (2000); Barnett C., …			5.4	Theme 9: virtual reality, tourism, travel behavior, tourist destination	virtual reality, tourism, travel behavior, tourist destination	Q1	9	131	0.615	0.2999	73.1527	0.3852	0	0.5	0.4167	0.1389	4.9732	0.2504	0.1577	1	0.0208	0.5899	Q1: Core / Established	Q1: Emerging / Growth
Eckhardt A.; Laumer S.; Weitzel T.	Who influences whom Analyzing workplace referents' social influence on IT adoption and non-adoption	2009	Journal of Information Technology	197	10.1057/jit.2008.31	https://www.scopus.com/inward/record.uri?eid=2-s2.0-62949117569&doi=10.1057%2fjit.2008.31&partnerID=40&md5=705633df57f23a756a89ca71b0f702f0	Technology adoption research has long struggled to incorporate normative beliefs from sources in the social environment of adopters into adoption models. We study the role of social influence from different workplace referent groups, like superiors and colleagues from the same or the IT department, on the intention to adopt. An empirical analysis, using data from 152 firms, based on the Unified T…	Non-adoption; Organizational context; Peer group pressure; Social influence; Technology adoption; UTAUT		Agarwal R., Individual Acceptance of Information Technologies, Framing the Domains of IT Management: Projecting the Future through the Past, pp. 85-104, (2000); Ahtola O.T., Toward a Vector Model of Intentions, Advances in Consumer Research, 3, pp. 481-484, (1976); Ajzen I., From Intentions to Actions: A theory of planned behavior, Action Control: From Cognition to Behavior, pp. 11-39, (1985); Aj…			5.4	Theme 10: retailing, mobile phone, shopping activity, social influence	retailing, mobile phone, shopping activity, social influence	Q1	10	90	0.5901	0.2244	68.1556	0.3416	0	0.5	0.0526	0.0175	4.2725	0	0.1463	0.8713	0.0249	0.75	Q1: Core / Established	Q1: Emerging / Growth
Kim C.; Jahng J.; Lee J.	An empirical investigation into the utilization-based information technology success model: Integrating task-performance and social influence perspective	2007	Journal of Information Technology	33	10.1057/palgrave.jit.2000072	https://www.scopus.com/inward/record.uri?eid=2-s2.0-34249670742&doi=10.1057%2fpalgrave.jit.2000072&partnerID=40&md5=92cc6860d9f48dd9e3bdee0e21fe1783	This paper develops the utilization-based information technology (IT) success model by integrating key variables from IT acceptance and IT success literatures, and empirically validates it. The model shows relations among IT utilization, performance expectancy, social influence, and user satisfaction. A field study was undertaken to evaluate and test the relationships via structural equation mode…	Information technology success; Performance expectancy; Social influence; User satisfaction; Utilization		Ajzen I., The Theory of Planned Behavior, Organizational Behavior and Human Decision Processes, 50, 2, pp. 179-211, (1991); Amoroso D.L., Cheney P.H., Testing a Causal Model of End-User Application Effectiveness, Journal of MIS, 8, 1, pp. 63-89, (1991); Bandura A., Social Foundations of Thoughts and Action, (1986); Baroudi J.J., Olson M.H., Ives B., An Empirical Study of the Impact of User Involv…			5.4	Theme 10: retailing, mobile phone, shopping activity, social influence	retailing, mobile phone, shopping activity, social influence	Q1	10	90	0.5901	0.2244	68.1556	0.3416	0	0.5	0.0526	0.0175	4.2725	0	0.1463	0.8713	0.0249	0.75	Q1: Core / Established	Q1: Emerging / Growth
Oh S.; Ahn J.; Kim B.	Adoption of broadband Internet in Korea: The role of experience in building attitudes	2003	Journal of Information Technology	167	10.1080/0268396032000150807	https://www.scopus.com/inward/record.uri?eid=2-s2.0-0345870994&doi=10.1080%2f0268396032000150807&partnerID=40&md5=e110c877cb197400ee95f94d230c8421	Although many countries are attempting to build an information infrastructure and accelerate the adoption of broadband Internet access technology, the results are not always satisfactory. The focus of earlier research on the diffusion and adoption of broadband Internet access has been primarily on the construction of a national-level infrastructure or on macro-level factors such as government pol…		Behavioral research; Competition; Customer satisfaction; Information technology; Information use; Internet; Marketing; Public policy; Social aspects; Telecommunication services; Technology acceptance models; User attitudes; Broadband networks	Adams D.A., Nelson R.R., Todd P.A., Perceived usefulness, ease of use, and usage of information technology: A replication, MIS Quarterly, 16, 2, pp. 227-247, (1992); Agarwal R., Prasad J., Are individual differences germane to the acceptance of new information technologies, Decision Sciences, 30, 2, pp. 361-391, (1999); Agarwal R., Sambamurthy V., Stair R.M., Research report: The evolving relatio…			5.4	Theme 2: china, investments, electric vehicle, electric vehicles	china, investments, electric vehicle, electric vehicles	Q1	2	462	0.2421	0.3314	47.0952	0.1576	0	0.5	0.4028	0.1343	6.843	0.9185	0.0957	0.3025	0.0068	0.0356	Q4: Emerging / Structural	Q4: Frontier / Niche
Beukes B.; Kirstein M.; Kunz R.; Nagel L.	Innovators to laggards–how South African students adopted and perceived technologically enhanced learning*	2018	Accounting Education	7	10.1080/09639284.2017.1417875	https://www.scopus.com/inward/record.uri?eid=2-s2.0-85038371333&doi=10.1080%2f09639284.2017.1417875&partnerID=40&md5=ab079f572f7eaa1f0b90d886b63d828c	The purpose of this study is to determine whether the information and communication technology (ICT) adoption profiles of accounting students at a South African university influenced their perceptions of the usefulness of a technologically enhanced learning (TEL) opportunity. The findings suggest that the South African accounting students’ ICT adoption profiles differ from global profiles as thei…	digital divide; Information and communication technology; Rogers diffusion of technology; technologically enhanced learning opportunities; technology adoption		Abouchedid K., Eid G.M., E-learning challenges in the Arab world: Revelations from a case study profile, Quality Assurance in Education, 12, 1, pp. 15-27, (2004); Anderson P.H., Lawton L., Business simulations and cognitive learning: Developments, desires, and future directions, Simulation & Gaming, 40, 2, pp. 193-216, (2009); Beaudin B.P., Quick D., Experiential learning: Theoretical underpinnin…		Routledge	2.8	Not Clustered (Low Keyword Overlap)		Q1	-1	0	0	0	0	0	0	0	0	0	0	0	0	0	0	0
Mungal A.; Cloete M.	Preparing underprepared students for higher education and beyond: the development and implementation of an integrated project	2016	Accounting Education	9	10.1080/09639284.2016.1157760	https://www.scopus.com/inward/record.uri?eid=2-s2.0-84966698994&doi=10.1080%2f09639284.2016.1157760&partnerID=40&md5=b89018b07defefaf379448a38b0b970f	A current problem faced in South Africa is that university graduates are weak and underprepared for the work environment. The purpose of this study was to assist students in bridging the aforementioned gap and to ease the transition from theory to practice. The aim of the study was to critically analyse the development and implementation of the integrated project. This study targeted first-year (…	authentic integrated project; Critical Cross Field Outcomes; Student under-preparedness; student-centredness; work-readiness		(2010); Boud D., Falchikov N., Aligning assessment with long-term learning, Assessment & Evaluation in Higher Education, 31, 4, pp. 399-413, (2006); Cloete M., (2015); Coetzee M., Measuring student graduateness: Reliability and construct validity of the Graduate Skills and Attribute Scale, Higher Education Research & Development, 33, 5, pp. 887-902, (2014); (2014); Handbook for 2015 Department of…		Routledge	2.8	Not Clustered (Low Keyword Overlap)		Q1	-1	0	0	0	0	0	0	0	0	0	0	0	0	0	0	0
Chen S.; Tian D.; Law R.; Zhang M.	Bibliometric and visualized review of smart tourism research	2022	International Journal of Tourism Research	27	10.1002/jtr.2501	https://www.scopus.com/inward/record.uri?eid=2-s2.0-85119270681&doi=10.1002%2fjtr.2501&partnerID=40&md5=e59db025dd5eed57b674ebecb0f4e874	Using bibliometric analysis, this research provides a comprehensive, systematic, and visual overview of 441 studies related to smart tourism, which were published between 2010 and 2021, thus considering the state of research and trends in this research field from the beginning of smart tourism research to the entry of the fifth-generation mobile communication technology era and the explosion of C…	bibliometric analysis; CiteSpace; smart hospitality; smart technology; smart tourism; visualized analysis	information and communication technology; mobile communication; research work; technology adoption; theoretical study; tourism development; tourism economics; visualization	Azis N., Amin M., Chan S., Aprilia C., How smart tourism technologies affect tourist destination loyalty, Journal of Hospitality and Tourism Technology, 11, 4, pp. 603-625, (2020); Baggio R., Micera R., Del Chiappa G., Smart tourism destinations: A critical reflection, Journal of Hospitality and Tourism Technology, 11, 3, pp. 407-423, (2020); Ballina F.J., Valdes L., Del Valle E., The Phygital ex…		John Wiley and Sons Ltd	5.7	Theme 9: virtual reality, tourism, travel behavior, tourist destination	virtual reality, tourism, travel behavior, tourist destination	Q1	9	131	0.615	0.2999	73.1527	0.3852	0	0.5	0.4167	0.1389	4.9732	0.2504	0.1577	1	0.0208	0.5899	Q1: Core / Established	Q1: Emerging / Growth
Mandal S.; Dubey R.K.	Role of tourism IT adoption and risk management orientation on tourism agility and resilience: Impact on sustainable tourism supply chain performance	2020	International Journal of Tourism Research	22	10.1002/jtr.2381	https://www.scopus.com/inward/record.uri?eid=2-s2.0-85095677230&doi=10.1002%2fjtr.2381&partnerID=40&md5=83eace122e5b3c3304a9e826f89d86ce	The study explored the influence of tourism IT adoption and risk management orientation on tourism supply chain agility and resilience that may impact sustainable tourism supply chain performance using dynamic capability view. The study gathered 302 perceptual responses from hotels and tour companies and analyzed using structural equation modeling in AMOS. The study also evaluated for invariance …	agility; IT adoption; resilience; risk management; sustainability; tourism	ecotourism; information technology; supply chain management; sustainability; technology adoption; tourism management	Amit R., Schoemaker P.J.H., Strategic assets and organizational rent, Strategic Management Journal, 14, pp. 33-46, (1993); Azmi A., Hamid I.A., Ahmad J.A., Ramli R.A., Tourism supply chain perspectives on border shopping development at Padang Besar, Malaysia, Balancing development and sustainability in tourism destinations, (2017); Babu D.E., Kaur A., Rajendran C., Sustainability practices in tou…		John Wiley and Sons Ltd	5.7	Theme 9: virtual reality, tourism, travel behavior, tourist destination	virtual reality, tourism, travel behavior, tourist destination	Q1	9	131	0.615	0.2999	73.1527	0.3852	0	0.5	0.4167	0.1389	4.9732	0.2504	0.1577	1	0.0208	0.5899	Q1: Core / Established	Q1: Emerging / Growth
Krizaj D.; Brodnik A.; Bukovec B.	A tool for measurement of innovation newness and adoption in tourism firms	2014	International Journal of Tourism Research	59	10.1002/jtr.1905	https://www.scopus.com/inward/record.uri?eid=2-s2.0-84896734988&doi=10.1002%2fjtr.1905&partnerID=40&md5=c8edca8542270ef64f6ca976a01eeb5a	The paper focuses on the newness characteristic of realized innovations and their adoption in tourism firms. For that purpose it investigates three research problems: (i) measurement of newness level and adoption of tourism innovations; (ii) definition of tourism innovations taxonomy (needed for the measurement); and (iii) statistical analysis of innovations' adoption in tourism destinations (res…	Adoption of innovations; Innovation taxonomy; Tourism innovation	benchmarking; innovation; measurement method; technology adoption; tourism	Abernathy W.J., Clark K.B., Innovation: mapping the winds of creative destruction, Readings in the Management of Innovation, pp. 55-78, (1985); Abernathy W.J., Utterback J.M., Patterns of industrial innovation, Technology Review, 80, pp. 40-47, (1978); Ahn M.J., Zwikael O., Bednarek R., Technological invention to product innovation: A project management approach, International Journal of Project …			5.7	Theme 9: virtual reality, tourism, travel behavior, tourist destination	virtual reality, tourism, travel behavior, tourist destination	Q1	9	131	0.615	0.2999	73.1527	0.3852	0	0.5	0.4167	0.1389	4.9732	0.2504	0.1577	1	0.0208	0.5899	Q1: Core / Established	Q1: Emerging / Growth
Fjelstul J.; Fyall A.	Sustainable Drive Tourism: A Catalyst for Change	2015	International Journal of Tourism Research	24	10.1002/jtr.2013	https://www.scopus.com/inward/record.uri?eid=2-s2.0-84940579018&doi=10.1002%2fjtr.2013&partnerID=40&md5=0a9ebddd49cb4736be731ca9132ceb28	Drive tourism remains an under-researched component of the wider tourism industry. As such, this study reviews the drive tourism phenomenon with attention focused on the anticipated impact of the implementation and adoption of new clean energy technologies. The study concludes with a discussion of the implications for the drive tourist, the drive tourism experience and the drive tourism sector. I…	Clean energy; Climate change; Drive tourism; Sustainability	United States; climate change; ecotourism; technology adoption; tourism development	(2013); (2014); Becken S., Simmons D., Frampton C., Energy use associated with different travel choices, Tourism Management, 24, 3, pp. 267-277, (2003); Beeton S., The case study in tourism research: a multi-method case study approach, Tourism Research Methods: Integrating Theory with Practice, pp. 37-48, (2005); Bernard R., Research Methods in Cultural Anthropology, (1988); Broughton P.S., The i…		John Wiley and Sons Ltd	5.7	Theme 2: china, investments, electric vehicle, electric vehicles	china, investments, electric vehicle, electric vehicles	Q1	2	462	0.2421	0.3314	47.0952	0.1576	0	0.5	0.4028	0.1343	6.843	0.9185	0.0957	0.3025	0.0068	0.0356	Q4: Emerging / Structural	Q4: Frontier / Niche
Liu H.; Park K.-S.	Exploring the impact of metaverse tourism experiences on actual visit intentions: An integrated model of presence, the Technology Acceptance Model, and the Theory of Planned Behavior	2024	International Journal of Tourism Research	0	10.1002/jtr.2616	https://www.scopus.com/inward/record.uri?eid=2-s2.0-85182491733&doi=10.1002%2fjtr.2616&partnerID=40&md5=dac4a607d90e0a8b44afcd4d659fef8c	This study seeks to understand the impact of tourist experience of the metaverse on users' actual visit intentions by proposing an integration of the Technology Acceptance Model (TAM) and the Theory of Planned Behavior (TPB), using the construct of Presence. We developed a questionnaire-based experiment in which 478 responses were collected via an online survey to achieve the objectives of the st…	metaverse tourism; presence; technology acceptance model; theory of planned behavior	information and communication technology; integrated approach; Internet; technology adoption; tourism development; tourism market; tourist behavior; tourist destination; virtual reality	Ajzen I., The theory of planned behavior, Organizational Behavior and Human Decision Processes, 50, 2, pp. 179-211, (1991); Assaker G., Age and gender differences in online travel reviews and user-generated-content (UGC) adoption: Extending the technology acceptance model (TAM) with credibility theory, Journal of Hospitality Marketing & Management, 29, 4, pp. 428-449, (2020); Atzeni M., Del Chiap…		John Wiley and Sons Ltd	5.7	Theme 9: virtual reality, tourism, travel behavior, tourist destination	virtual reality, tourism, travel behavior, tourist destination	Q1	9	131	0.615	0.2999	73.1527	0.3852	0	0.5	0.4167	0.1389	4.9732	0.2504	0.1577	1	0.0208	0.5899	Q1: Core / Established	Q1: Emerging / Growth
Abou-Shouk M.; Lim W.M.; Megicks P.	Internet adoption by travel agents: A case of Egypt	2013	International Journal of Tourism Research	29	10.1002/jtr.1876	https://www.scopus.com/inward/record.uri?eid=2-s2.0-84876703307&doi=10.1002%2fjtr.1876&partnerID=40&md5=0fa89326f347ade4cdcb970f255c2c4a	Current collaborative and rapid developments in tourism and information and communication technologies (ICTs) make it difficult to imagine that tourism existed before ICTs. Communication technology is one main reason for the existence of the Internet. Travel agents (TAs) are among service providers whom their Internet adoption could be the best marketing device for their business and a tool for t…	Egypt; Internet adoption; Internet usage; Travel agencies	Egypt; information and communication technology; Internet; marketing; technology adoption; tourism	Alexander S., (2000); Alvarez L., Martin A., Casielles R., Relationship marketing and information and communication technologies: Analysis of retail travel agencies, Journal of Travel Research, 45, pp. 453-463, (2007); Anckar B., Drivers and inhibitors to e-commerce adoption: exploring the rationality of consumer behavior in the electronic marketplace., (2003); Ayeh J., Determinants of internet u…			5.7	Theme 9: virtual reality, tourism, travel behavior, tourist destination	virtual reality, tourism, travel behavior, tourist destination	Q1	9	131	0.615	0.2999	73.1527	0.3852	0	0.5	0.4167	0.1389	4.9732	0.2504	0.1577	1	0.0208	0.5899	Q1: Core / Established	Q1: Emerging / Growth
Kim T.T.; Suh Y.K.; Lee G.; Choi B.G.	Modelling roles of task-technology fit and self-efficacy in hotel employees' usage behaviours of hotel information systems	2010	International Journal of Tourism Research	96	10.1002/jtr.787	https://www.scopus.com/inward/record.uri?eid=2-s2.0-78349236962&doi=10.1002%2fjtr.787&partnerID=40&md5=4a65b2831d7eca8d7c015afb2b246b60	The purpose of this study was to examine the relationship between hotel information system (HIS) users' personal perceptions and beliefs of the given system and their daily routine usage intention via the technology acceptance model (TAM), considering the two external variables (motivational variables) of the model---'task-technology fit' (extrinsic motivation; system feature) and 'self-efficacy'…	Hotel information system; Self-efficacy; Task-technology fit; Technology acceptance model	Cheju [Cheju (PRV/ISL)]; Cheju [South Korea]; South Korea; hypothesis testing; information system; modeling; perception; service sector; technology adoption	Adams D.A., Nelson R.R., Todd P.A., Perceived usefulness, ease of use, and usage of information technology: A replication, MIS Quarterly, 16, 2, pp. 227-247, (1992); Agarwal R., Prasad J., The role of innovation characteristics and perceived voluntariness in the acceptance of information technologies, Decision Sciences, 28, 3, pp. 557-582, (1997); Agarwal R., Prasad J., Are individual differences…			5.7	Theme 9: virtual reality, tourism, travel behavior, tourist destination	virtual reality, tourism, travel behavior, tourist destination	Q1	9	131	0.615	0.2999	73.1527	0.3852	0	0.5	0.4167	0.1389	4.9732	0.2504	0.1577	1	0.0208	0.5899	Q1: Core / Established	Q1: Emerging / Growth
Hailey Shin H.; Jeong M.; Cho M.-H.	The impact of smart tourism technology and domestic travelers' technology readiness on their satisfaction and behavioral intention: A cross-country comparison	2021	International Journal of Tourism Research	32	10.1002/jtr.2437	https://www.scopus.com/inward/record.uri?eid=2-s2.0-85102532491&doi=10.1002%2fjtr.2437&partnerID=40&md5=15b2c713e2a16ef91ba57feb18087c87	Despite the increasing use of tourism technology, not much has been discovered about the effects of the external aspects of tourism technology with internal inclination of travelers to adopt the technologies. This study attempted to examine the influence of smart tourism technologies (STTs) and travelers' technology readiness (TR) on satisfaction and future behavioral intention. Comparing two sma…	cross-country research; intention; satisfaction; smart tourism technology; technology readiness	South Korea; United States; comparative study; technology adoption; tourism development; tourist behavior; tourist destination; travel behavior	Abubakar A.M., Ilkan M., Al-Tal R.M., Eluwole K.K., eWOM, revisit intention, destination trust and gender, Journal of Hospitality and Tourism Management, 31, pp. 220-227, (2017); Ahuja M.K., Thatcher J.B., Moving beyond intentions and toward the theory of trying: Effects of work environment and gender on post-adoption information technology use, MIS Quarterly, 29, 3, pp. 427-459, (2005); Anderson…		John Wiley and Sons Ltd	5.7	Theme 9: virtual reality, tourism, travel behavior, tourist destination	virtual reality, tourism, travel behavior, tourist destination	Q1	9	131	0.615	0.2999	73.1527	0.3852	0	0.5	0.4167	0.1389	4.9732	0.2504	0.1577	1	0.0208	0.5899	Q1: Core / Established	Q1: Emerging / Growth
Mang C.F.; Piper L.A.; Brown N.R.	The Incidence of Smartphone Usage among Tourists	2016	International Journal of Tourism Research	40	10.1002/jtr.2076	https://www.scopus.com/inward/record.uri?eid=2-s2.0-84993967461&doi=10.1002%2fjtr.2076&partnerID=40&md5=8a6a76c3a64f5929a5cafbba00b0dfcc	We explore smartphone utilization by tourists from 24 countries visiting either Rome, Italy or Athens, Greece. By extending a standard technology acceptance model, we identify common travel uses for smartphones, which include taking photos, social networking, viewing maps, finding transportation and searching for shops and restaurants. Younger cohorts utilize their phones more than older cohorts,…	mobile phone; technology acceptance model; tourism; travel	Athens [Attica]; Attica; Greece; Italy; Italy; Lazio; Roma [Lazio]; Rome; future prospect; mobile communication; technology adoption; tourist behavior; travel behavior	Bader A., Baldauf M., Leinert S., Fleck M., Liebrich A., Mobile tourism services and technology acceptance in a mature domestic tourism market: the case of Switzerland, Information and Communication Technologies in Tourism 2012, pp. 296-307, (2012); Bolton R.N., Parasuraman A., Hoefnagels A., Migchels N., Kabadayi S., Gruber T., Komarova Loureiro Y., Solnet D., Understanding Generation Y and Thei…		John Wiley and Sons Ltd	5.7	Theme 9: virtual reality, tourism, travel behavior, tourist destination	virtual reality, tourism, travel behavior, tourist destination	Q1	9	131	0.615	0.2999	73.1527	0.3852	0	0.5	0.4167	0.1389	4.9732	0.2504	0.1577	1	0.0208	0.5899	Q1: Core / Established	Q1: Emerging / Growth
Huang Y.C.; Backman K.F.; Backman S.J.; Chang L.L.	Exploring the Implications of Virtual Reality Technology in Tourism Marketing: An Integrated Research Framework	2016	International Journal of Tourism Research	352	10.1002/jtr.2038	https://www.scopus.com/inward/record.uri?eid=2-s2.0-84959204021&doi=10.1002%2fjtr.2038&partnerID=40&md5=b0209464869e6e00ce3f0e7f69fa8798	The proliferation of the Internet and other technological innovations has transformed the structure of the tourism industry as well as affected how tourism destinations are perceived and consumed. The 3D virtual world provides opportunities for destination marketing organizations to communicate with targeted markets by offering a rich environment for potential visitors to explore tourism destinat…	3D tourism environment; Behavioral intentions; Destination marketing; Self-determination theory; Technology acceptance model	information technology; Internet; marketing; tourism; tourist behavior; tourist destination; virtual reality	Abou-Shouk M., Megicks P., Lim W.M., Perceived benefits and e-commerce adoption by SME travel agents in developing countries: evidence from Egypt, Journal of Hospitality & Tourism Research, 37, 4, pp. 490-515, (2013); Ajzen I., The theory of planned behavior, Organizational Behavior and Human Decision Processes, 50, 2, pp. 179-211, (1991); Ajzen I., Driver B.L., Application of the theory of plann…		John Wiley and Sons Ltd	5.7	Theme 9: virtual reality, tourism, travel behavior, tourist destination	virtual reality, tourism, travel behavior, tourist destination	Q1	9	131	0.615	0.2999	73.1527	0.3852	0	0.5	0.4167	0.1389	4.9732	0.2504	0.1577	1	0.0208	0.5899	Q1: Core / Established	Q1: Emerging / Growth
Ryan C.; Rao U.	Holiday users of the Internet - Ease of use, functionality and novelty	2008	International Journal of Tourism Research	36	10.1002/jtr.660	https://www.scopus.com/inward/record.uri?eid=2-s2.0-53849133110&doi=10.1002%2fjtr.660&partnerID=40&md5=d37977ae864bc9e3d7574bc35bf7d273	This study is based upon a sample of 517 international visitors to New Zealand. It suggests that Internet usage is based upon perceived usefulness and ease of system use. Of additional importance is user confidence about system security. Functional issues of purchasing seem to take priority over information search as users become more familiar with web pages. An additional finding is that enterta…	Innovation; Internet; Online travel shopping; Technology acceptance model	Australasia; New Zealand; information system; innovation; Internet; modeling; tourism market	Nielsen A.C., New Zealand Product: Potential and Actual Visitor Feedback from Key Markets, Report for Tourism, (2002); Arbuckle J.L., Amos 5.0 User's Guide, (2005); Ateljevic J., Small tourism firms and management practices in New Zealand: The Centre Stage Macro region, Tourism Management, 28, pp. 307-316, (2007); Baron R., Cognitive mechanisms in entrepreneurship: Why and when entrepreneurs thin…			5.7	Theme 9: virtual reality, tourism, travel behavior, tourist destination	virtual reality, tourism, travel behavior, tourist destination	Q1	9	131	0.615	0.2999	73.1527	0.3852	0	0.5	0.4167	0.1389	4.9732	0.2504	0.1577	1	0.0208	0.5899	Q1: Core / Established	Q1: Emerging / Growth
Liu X.; Vahtera P.; Wang C.; Wang J.; Wei Y.	The delicate balance: Managing technology adoption and creation in multinational affiliates in an emerging economy	2017	International Business Review	17	10.1016/j.ibusrev.2016.11.002	https://www.scopus.com/inward/record.uri?eid=2-s2.0-85007028730&doi=10.1016%2fj.ibusrev.2016.11.002&partnerID=40&md5=9379a2b0584ffe469d9cb128c44f2991	From a perspective of the resource-based view, this paper analyses the inter-connection between technology adoption and creation in affiliates of multinational enterprises (MNEs) in an emerging economy. Operating below the international technological frontier, multinational affiliates are more motivated to adopt technologies already existent from their MNEs than create new technologies, as the fo…	China; Emerging economy; Multinational enterprises; Resource-based view; Technology adoption; Technology creation		Achcaoucaou F., Miravitlles P., Leon-Darder F., Knowledge sharing and subsidiary R&D mandate development: A matter of dual embeddedness, International Business Review, 23, pp. 76-90, (2014); Adler P.S., Kwon S.-W., Social capital: Prospects for a new concept, Academy of Management Review, 27, pp. 17-40, (2002); Almeida P., Phene A., Subsidiaries and knowledge creation: The influence of MNC and ho…		Elsevier Ltd	6.1	Theme 2: china, investments, electric vehicle, electric vehicles	china, investments, electric vehicle, electric vehicles	Q1	2	462	0.2421	0.3314	47.0952	0.1576	0	0.5	0.4028	0.1343	6.843	0.9185	0.0957	0.3025	0.0068	0.0356	Q4: Emerging / Structural	Q4: Frontier / Niche
Martynov A.	Sequencing of emphases on technology alliances and internal R&D: The effects of the market cycle	2019	Long Range Planning	3	10.1016/j.lrp.2018.10.004	https://www.scopus.com/inward/record.uri?eid=2-s2.0-85061329469&doi=10.1016%2fj.lrp.2018.10.004&partnerID=40&md5=c0710eaa3124b22474450d67748e9e40	How does the market reward technological firms’ emphases on alliancing and R&D strategies depending on the phase in the market cycle? I use the 1990s’ “dot-com bubble” cycle and its burst after 2000 to look for joint effects of technology alliances and internal R&D investments on firm market valuations. I show that the existing theory is incomplete without considering (1) the temporal sequencing …	Dot-com bubble; Market cycle; R&D; Technology alliances; Technology companies	Commerce; Investments; Dot-com bubble; Market cycles; Market valuations; Technology alliance; Technology companies; Temporal sequences; Temporal sequencing; Theory of complementarities; high technology industry; investment; market system; research and development; technology adoption; valuation; Technology transfer	Adner R., Levinthal D.A., What is not a real option: considering boundaries for the application of real options to business strategy, Acad. Manag. Rev., 29, pp. 74-85, (2004); Agarwal R., Sarkar M., Echambadi R., The conditioning effect of time on firm survival: an industry life cycle approach, Acad. Manag. J., 45, pp. 971-994, (2002); Barth M.E., Cram D.P., Nelson K.K., Accruals and the predicti…		Elsevier Ltd	6.3	Theme 2: china, investments, electric vehicle, electric vehicles	china, investments, electric vehicle, electric vehicles	Q1	2	462	0.2421	0.3314	47.0952	0.1576	0	0.5	0.4028	0.1343	6.843	0.9185	0.0957	0.3025	0.0068	0.0356	Q4: Emerging / Structural	Q4: Frontier / Niche
Alexiou A.; Khanagha S.; Schippers M.C.	Productive organizational energy mediates the impact of organizational structure on absorptive capacity	2019	Long Range Planning	18	10.1016/j.lrp.2018.02.001	https://www.scopus.com/inward/record.uri?eid=2-s2.0-85042182080&doi=10.1016%2fj.lrp.2018.02.001&partnerID=40&md5=6d0bbac293db61a289725d9f98b2cf30	The ability of an organization to cope with radical technological change is regarded to be heavily dependent on its ability to absorb and apply knowledge from its environment. This study investigates the role of organizational structure in driving absorptive capacity and uncovers the role of the emergent phenomenon of organizational energy as the enabler of this relationship. A field study was co…	Affect/emotions; Dynamic capabilities; Organizational learning; Technology adoption	Enterprise resource planning; Finance; Affect/emotions; Dynamic capabilities; Emerging technologies; Organizational designs; Organizational learning; Organizational structures; Productive organizational energies; Technology adoption; cognition; Internet; knowledge; learning; technological change; technology adoption; Knowledge management	Accenture, A New Era for Retail: Cloud Computing Changes the Game, (2013); Accenture, A New Era for the Automotive Industry: How Cloud Computing Will Enable Automotive Companies to Change the Game, (2014); Accenture, Digital Disruptions in Investment Banking, (2014); Adler P., Borys B., Two types of bureaucracy: enabling and coercive, Adm. Sci. Q., 41, 1, pp. 61-89, (1996); Adner R., When are tec…		Elsevier Ltd	6.3	Theme 8: social media, social networking (online), knowledge, psychology	social media, social networking (online), knowledge, psychology	Q1	8	112	0.5845	0.1818	113.589	0.7384	0	0.5	0.2083	0.0694	5.2199	0.3385	0.096	0.3056	0.0183	0.4931	Q1: Core / Established	Q2: Mature / Potential
Vargha Z.	Performing a strategy's world: How redesigning customers made relationship banking possible	2018	Long Range Planning	19	10.1016/j.lrp.2017.03.003	https://www.scopus.com/inward/record.uri?eid=2-s2.0-85048737473&doi=10.1016%2fj.lrp.2017.03.003&partnerID=40&md5=b404311a33b9135ac3d94e207c791f6e	The paper investigates the performativity of strategy defined as a strategy's power to create the world it assumes. Building a theory based on both ‘Callonian’ and ‘Butlerian’ approaches to performativity, it focuses on the case of a large bank's retail strategy in Hungary, which relied on Customer Relationship Management (CRM) technology to develop personalised services and intensive selling so …	Actor-networks; Banking strategy; Customer Relationship Management; Customer value; Interaction; Performativity; Selling; Social studies of finance	Hungary; Public relations; Actor-network; Banking strategy; Customer relationship management; Customer values; Interaction; Performativity; Social study; actor network theory; banking; financial system; performance assessment; retailing; service quality; strategic approach; technology adoption; theoretical study; Sales	Akrich M., The de-scription of technical objects, Shaping Technology/Building Society: Studies in Sociotechnical Change Building Society, pp. 205-224, (1992); Ali M., Melewar T., Dennis C., Special issue on CRM: technology adoption, business implications, and social and cultural concerns, J. Mark. Manag., 29, pp. 391-392, (2013); Araujo L., Finch J., Kjellberg H., Reconnecting Marketing to Market…		Elsevier Ltd	6.3	Theme 2: china, investments, electric vehicle, electric vehicles	china, investments, electric vehicle, electric vehicles	Q1	2	462	0.2421	0.3314	47.0952	0.1576	0	0.5	0.4028	0.1343	6.843	0.9185	0.0957	0.3025	0.0068	0.0356	Q4: Emerging / Structural	Q4: Frontier / Niche
Appleyard M.M.; Chesbrough H.W.	The Dynamics of Open Strategy: From Adoption to Reversion	2017	Long Range Planning	150	10.1016/j.lrp.2016.07.004	https://www.scopus.com/inward/record.uri?eid=2-s2.0-84997840825&doi=10.1016%2fj.lrp.2016.07.004&partnerID=40&md5=b5282fcd2ee139fb0b60342a0cb0c240	Innovation has become more open in recent years. Yet the decision to become more open and the challenge of sustaining that openness are not well understood. This is the concern of the “content” branch of Open Strategy, defined as the branch that addresses an organization's open innovation strategy. We examine the initial motivations to adopt an open strategy, and then consider when organizations …		Commerce; Motivation; Faster rates; Open innovation; Value captures; Value creation; innovation; organizational framework; technology adoption; Sales	Allen R.C., Collective invention, Journal of Economic Behavior and Organization, 4, 1, pp. 1-24, (1983); Amadeo R., Google's iron grip on Android: controlling open source by any means necessary, (2013); Android, Why Apache Software license?, (2014); Appleyard M.M., Wang C.Y., Liddle J.A., Carruthers J., The innovator's non-dilemma: the case of next-generation lithography, Managerial and Decision …		Elsevier Ltd	6.3	Theme 8: social media, social networking (online), knowledge, psychology	social media, social networking (online), knowledge, psychology	Q1	8	112	0.5845	0.1818	113.589	0.7384	0	0.5	0.2083	0.0694	5.2199	0.3385	0.096	0.3056	0.0183	0.4931	Q1: Core / Established	Q2: Mature / Potential
Anokhin S.; Örtqvist D.; Thorgren S.; Wincent J.	Corporate Venturing Deal Syndication and Innovation: The Information Exchange Paradox	2011	Long Range Planning	35	10.1016/j.lrp.2010.12.005	https://www.scopus.com/inward/record.uri?eid=2-s2.0-79955468112&doi=10.1016%2fj.lrp.2010.12.005&partnerID=40&md5=8e6dae7264519d1d1d9b133c44b91602	Many incumbent corporations make equity investments in young technological start-ups to enhance their innovation effectiveness, and the great majority syndicate at least some of their investments with other incumbents. While syndication is generally held to benefit incumbent corporations, this study demonstrates that it may also be detrimental to corporate innovation, by elaborating the notion of…		Industry; Information dissemination; Investments; Optimization; Technology transfer; Best strategy; Corporate innovation; Corporate venturing; Data sets; Equity investment; Information exchanges; Investment decisions; Know-how; Knowledge-sharing; Open innovation; Start-ups; corporate strategy; information technology; innovation; investment; technology adoption; Online systems	Chesbrough H.W., Open innovation: the new imperative for creating and profiting from technology, (2003); Chesbrough H.W., Appleyard M.M., Open Innovation and Strategy, California Management Review, 50, 1, (2007); Dushnitsky G., Lenox M.J., When do incumbents learn from entrepreneurial ventures? Corporate venture capital and investing firm innovation rates, Research Policy, 34, 5, pp. 615-639, (20…			6.3	Theme 2: china, investments, electric vehicle, electric vehicles	china, investments, electric vehicle, electric vehicles	Q1	2	462	0.2421	0.3314	47.0952	0.1576	0	0.5	0.4028	0.1343	6.843	0.9185	0.0957	0.3025	0.0068	0.0356	Q4: Emerging / Structural	Q4: Frontier / Niche
El-Haddadeh R.; Weerakkody V.; Peng J.	Social networking services adoption in corporate communication: The case of China	2012	Journal of Enterprise Information Management	31	10.1108/17410391211272838	https://www.scopus.com/inward/record.uri?eid=2-s2.0-84867749378&doi=10.1108%2f17410391211272838&partnerID=40&md5=5f8b70cfa9fa981ec1142644c587d097	Purpose: The purpose of this paper is to explore empirically the adoption of social networking services in corporate communication within the context of China. Design/methodology/approach: After reviewing the extant literature on technology adoption, the paper proposes a conceptual model for studying the adoption of social networking in corporate communication. Based on this model a quantitative …	China; Chinese market; Corporate communications; Social networking services; Social networks; Technology adoption		Argenti P.A., How technology has influenced the field of corporate communication, Journal of Business and Technical Communication, 3, 3, pp. 357-370, (2006); Balmer J., Gray E., Corporate identity and corporate communication: Creating a strategic advantage, corporate communications, An International Journal, 1, 4, pp. 171-176, (1999); Balmer J.M.T., Greyser S.A., Revealing the Corporation: Perspe…			6.4	Theme 2: china, investments, electric vehicle, electric vehicles	china, investments, electric vehicle, electric vehicles	Q1	2	462	0.2421	0.3314	47.0952	0.1576	0	0.5	0.4028	0.1343	6.843	0.9185	0.0957	0.3025	0.0068	0.0356	Q4: Emerging / Structural	Q4: Frontier / Niche
Guan W.; Ding W.; Zhang B.; Verny J.	The role of supply chain alignment in coping with resource dependency in blockchain adoption: empirical evidence from China	2023	Journal of Enterprise Information Management	3	10.1108/JEIM-11-2021-0491	https://www.scopus.com/inward/record.uri?eid=2-s2.0-85145748665&doi=10.1108%2fJEIM-11-2021-0491&partnerID=40&md5=5a9bf64ec8440748dd5d4592dea4bb39	Purpose: The deployment of blockchain technology (BT) throughout the supply chain is usually led by large firms that dominate the supply chain. Leading firms can encourage other resource-constrained partners to get on board by providing technical and financial support. However, due to the uncertain consequences of relying on leading firms, these partners may still be reluctant to adopt BT. Drawin…	Adoption; Blockchain technology; China; Guanxi; Resource dependence theory; Supply chain alignment		Armstrong J.S., Overton T.S., Estimating nonresponse bias in mail surveys, Journal of Marketing Research, 14, 3, pp. 396-402, (1977); Awa H., Ojiabo O., A model of adoption determinants of ERP within T-O-E framework, Information Technology and People, 29, 4, pp. 901-930, (2016); Bhattacharya M., Wamba S.F., A conceptual framework of RFID adoption in retail using TOE framework, Technology Adoption…		Emerald Publishing	6.4	Theme 2: china, investments, electric vehicle, electric vehicles	china, investments, electric vehicle, electric vehicles	Q1	2	462	0.2421	0.3314	47.0952	0.1576	0	0.5	0.4028	0.1343	6.843	0.9185	0.0957	0.3025	0.0068	0.0356	Q4: Emerging / Structural	Q4: Frontier / Niche
Eid Mohamed B.; Elkaftangui M.; Farouk S.	A computer-based participatory model for customization in the UAE housing market	2017	Journal of Enterprise Information Management	5	10.1108/JEIM-01-2016-0016	https://www.scopus.com/inward/record.uri?eid=2-s2.0-85014031678&doi=10.1108%2fJEIM-01-2016-0016&partnerID=40&md5=f9d89f9f598b1cca0670af3188edfeee	Purpose: The purpose of this paper is to propose a novel framework and a systematic group of methodologies for constructing a computer-based design system that could support homebuyers’ participation in the design of their dwellings in the UAE housing market. Design/methodology/approach: In order to construct the framework, the paper first presents an overview of current applications of mass cust…	Architecture; Housing; Mass customization		UAE Property Review Special Edition: Historic Review 2008-2014 and 2015 Outlook, (2014); Blecker T., Friedrich G., Mass Customization: Challenges and Solutions, (2006); Chandra C., Kamrani A.K., Mass Customization: A Supply Chain Approach, (2004); Eid Mohamed B., A digital platform for mass customization of housing, (2014); Huang C.H., Krawczyk R.J., Web based BIM for modular house development: q…		Emerald Group Publishing Ltd.	6.4	Theme 2: china, investments, electric vehicle, electric vehicles	china, investments, electric vehicle, electric vehicles	Q1	2	462	0.2421	0.3314	47.0952	0.1576	0	0.5	0.4028	0.1343	6.843	0.9185	0.0957	0.3025	0.0068	0.0356	Q4: Emerging / Structural	Q4: Frontier / Niche
Al-Emran M.; Granić A.; Al-Sharafi M.A.; Ameen N.; Sarrab M.	Examining the roles of students' beliefs and security concerns for using smartwatches in higher education	2020	Journal of Enterprise Information Management	32	10.1108/JEIM-02-2020-0052	https://www.scopus.com/inward/record.uri?eid=2-s2.0-85091184915&doi=10.1108%2fJEIM-02-2020-0052&partnerID=40&md5=89bdb8b366f385884332709703ea7861	Purpose: Despite the increased use of wearables in education, little attention has been paid to why some students are more likely to adopt smartwatches than others. The question of what impacts the adoption of smartwatches in educational activities is still neglected. In addition, the question of how security determinants can affect the adoption of smartwatches by students has not been addressed …	Individuals' beliefs; PMT; Security concerns; Smartwatches; TAM; Wearable technology		Ab Rahman N.H., Choo K.K.R., Factors influencing the adoption of cloud incident handling strategy: a preliminary study in Malaysia, 2015 Americas Conference on Information Systems, AMCIS 2015, (2015); Abdullah F., Ward R., Developing a general extended technology acceptance model for e-learning (GETAMEL) by analysing commonly used external factors, Computers in Human Behavior, 56, pp. 238-256, (2…		Emerald Group Holdings Ltd.	6.4	Theme 5: health care, mhealth, india, internet of things	health care, mhealth, india, internet of things	Q1	5	136	0.2703	0.3017	47.4706	0.1609	0	0.5	0.6316	0.2105	5.3761	0.3943	0.0957	0.3027	0.015	0.3605	Q3: Niche / Transient	Q4: Frontier / Niche
Meske C.; Junglas I.; Stieglitz S.	Explaining the emergence of hedonic motivations in enterprise social networks and their impact on sustainable user engagement: A four-drive perspective	2019	Journal of Enterprise Information Management	23	10.1108/JEIM-08-2018-0177	https://www.scopus.com/inward/record.uri?eid=2-s2.0-85066055038&doi=10.1108%2fJEIM-08-2018-0177&partnerID=40&md5=19588b32fd418d824e1726b298a1af96	Purpose: Enterprise social networks (ESNs) in organizations have become an increasingly important technology to support the exchange of information and knowledge. Many ESN projects fail due to insufficient engagement in the long run, leading to the high risk of sunk costs. The purpose of this paper is to investigate how hedonic motivations, along with normative motivations, play an important role…	Enjoyment; Enterprise social network; Hedonic motivation; Social influence; Technology acceptance; Workplace		Aboelmaged M.G., Knowledge sharing through enterprise social network (ESN) systems: motivational drivers and their impact on employees’ productivity, Journal of Knowledge Management, 22, 2, pp. 362-383, (2018); Abraham C., Boudreau M.C., Junglas I., Watson R., Enriching our theoretical repertoire: the role of evolutionary psychology in technology acceptance, European Journal of Information System…		Emerald Group Holdings Ltd.	6.4	Theme 10: retailing, mobile phone, shopping activity, social influence	retailing, mobile phone, shopping activity, social influence	Q1	10	90	0.5901	0.2244	68.1556	0.3416	0	0.5	0.0526	0.0175	4.2725	0	0.1463	0.8713	0.0249	0.75	Q1: Core / Established	Q1: Emerging / Growth
Pandey S.; Chawla D.	Engaging m-commerce adopters in India: Exploring the two ends of the adoption continuum across four m-commerce categories	2019	Journal of Enterprise Information Management	30	10.1108/JEIM-06-2018-0109	https://www.scopus.com/inward/record.uri?eid=2-s2.0-85059339524&doi=10.1108%2fJEIM-06-2018-0109&partnerID=40&md5=cec0303c7c99d0caeaa2ac8d6497ee7b	Purpose: The purpose of this paper is to identify the impact of factors derived from the unified theory of user acceptance of technology (performance expectancy, effort expectancy, social influence, facilitating conditions, age, gender) and of those drawn from literature (perceived risk, perceived enjoyment and innovativeness) on the adoption of m-commerce in India. It also suggests implications …	Content delivery m-commerce; India		Agarwal R., Prasad J., A conceptual and operational definition of personal innovativeness in the domain of information technology, Information System Research, 9, 2, pp. 204-215, (1998); Agrebi S., Jallais J., Explain the intention to use smartphones for mobile shopping, Journal of Retailing and Consumer Services, 22, pp. 16-23, (2015); Alalwan A.A., Dwivedi Y.K., Rana N.P., Williams M.D., Consum…		Emerald Group Holdings Ltd.	6.4	Theme 5: health care, mhealth, india, internet of things	health care, mhealth, india, internet of things	Q1	5	136	0.2703	0.3017	47.4706	0.1609	0	0.5	0.6316	0.2105	5.3761	0.3943	0.0957	0.3027	0.015	0.3605	Q3: Niche / Transient	Q4: Frontier / Niche
Marakarkandy B.; Yajnik N.; Dasgupta C.	Enabling internet banking adoption: An empirical examination with an augmented technology acceptance model (TAM)	2017	Journal of Enterprise Information Management	127	10.1108/JEIM-10-2015-0094	https://www.scopus.com/inward/record.uri?eid=2-s2.0-85014012181&doi=10.1108%2fJEIM-10-2015-0094&partnerID=40&md5=66ba5688ba038bea2e521e2dbe0859c3	Purpose: The integration of relevant antecedents into TAM would lead to better understanding of the decision factors which act as enablers for the adoption of internet banking. The purpose of the paper is to determine the influence of the antecedents subjective norm, image, banks initiative, internet banking self-efficacy, internet usage efficacy, trust, perceived risk, trialability and governmen…	India; Internet banking; Structural equation modelling (SEM); Technology acceptance model (TAM)		Abbasi M.S., Tarhini A., Elyas T., Shah F., Impact of individualism and collectivism over the individual’s technology acceptance behaviour: a multi-group analysis between Pakistan and Turkey, Journal of Enterprise Information Management, 28, 6, pp. 747-768, (2015); Adams D., Nelson R., Todd P., Perceived usefulness, ease of use, and usage of information technology: a replication, MIS Quarterly, 1…		Emerald Group Publishing Ltd.	6.4	Theme 5: health care, mhealth, india, internet of things	health care, mhealth, india, internet of things	Q1	5	136	0.2703	0.3017	47.4706	0.1609	0	0.5	0.6316	0.2105	5.3761	0.3943	0.0957	0.3027	0.015	0.3605	Q3: Niche / Transient	Q4: Frontier / Niche
Rauniar R.; Rawski G.; Yang J.; Johnson B.	Technology acceptance model (TAM) and social media usage: An empirical study on Facebook	2014	Journal of Enterprise Information Management	583	10.1108/JEIM-04-2012-0011	https://www.scopus.com/inward/record.uri?eid=2-s2.0-84893473569&doi=10.1108%2fJEIM-04-2012-0011&partnerID=40&md5=d21c96bfd9a6d23d2a607108af3b4ab7	Purpose: Given the widespread popularity of social media, such as Twitter, Facebook, Google+, and LinkedIn, theorizing and understanding the user attitude and usage behavior of social media site is fundamental in developing future understandings and deployment of these new technologies. One approach to such studies on drivers of social media usage behavior would be to revisit the technology accep…	Facebook; Social media; TAM		Ajzen I., The theory of planned behavior, Organizational Behavior and Human Decision Processes, 50, 2, pp. 179-211, (1991); Ajzen I., Fishbein M., Understanding Attitude and Predicting Social Behavior, (1980); Arbuckle J.L., Amos 5.0 to the Amos User's Guide, (2003); Bandura A., Self-efficacy: Towards a unifying theory of behavioural change, Psychological Review, 84, 2, pp. 191-215, (1977); Bentl…			6.4	Theme 8: social media, social networking (online), knowledge, psychology	social media, social networking (online), knowledge, psychology	Q1	8	112	0.5845	0.1818	113.589	0.7384	0	0.5	0.2083	0.0694	5.2199	0.3385	0.096	0.3056	0.0183	0.4931	Q1: Core / Established	Q2: Mature / Potential
Delmas M.A.; Kohli A.	Can Apps Make Air Pollution Visible? Learning About Health Impacts Through Engagement with Air Quality Information	2020	Journal of Business Ethics	22	10.1007/s10551-019-04215-7	https://www.scopus.com/inward/record.uri?eid=2-s2.0-85067979709&doi=10.1007%2fs10551-019-04215-7&partnerID=40&md5=b3c9ca232b2824a2455b13651b923ef5	Air pollution is one of the largest environmental health risks globally but is often imperceptible to people. Air quality smartphone applications (commonly called apps) provide real-time localized air quality information and have the potential to help people learn about the health effects of air pollution and enable them to take action to protect their health. Hundreds of air quality apps are now…	Air pollution; Behavior change; Health protection; Information strategies; Information technologies; Mobile applications; Sustainability		Ajzen I., The theory of planned behavior, Organizational Behavior and Human Decision Processes, 50, pp. 179-211, (1991); Armitage C.J., Conner M., Efficacy of the Theory of planned behaviour: A meta-analytic review, British Journal of Social Psychology, 40, pp. 471-499, (2001); Asensio O.I., Delmas M.A., Nonprice incentives and energy conservation, Proceedings of the National Academy of Sciences …		Springer	6.7	Theme 10: retailing, mobile phone, shopping activity, social influence	retailing, mobile phone, shopping activity, social influence	Q1	10	90	0.5901	0.2244	68.1556	0.3416	0	0.5	0.0526	0.0175	4.2725	0	0.1463	0.8713	0.0249	0.75	Q1: Core / Established	Q1: Emerging / Growth
Tsai J.-M.; Hung S.-W.; Lin G.-T.	Continued usage of smart wearable devices (SWDs): cross-level analysis of gamification and network externality	2022	Electronic Markets	6	10.1007/s12525-022-00575-7	https://www.scopus.com/inward/record.uri?eid=2-s2.0-85135804065&doi=10.1007%2fs12525-022-00575-7&partnerID=40&md5=32cac17174075450b4198b8917d14494	With the increasing maturity of mobile networks and big data technology, smart wearable devices (SWDs) are regarded as a new technology trend following smartphones. Especially during the COVID-19 pandemic, the increase in telework and the growing interest in self-health monitoring have greatly promoted the market growth of SWDs. This study aimed to investigate the factors affecting the continued …	Gamification; Hierarchical linear modelling; Network externality; Perceived value; Self-health monitoring; Smart wearable devices		Adapa A., Nah F.F., Hall R.H., Siau K., Smith S.N., Factors influencing the adoption of smart wearable devices, International Journal of Human - Computer Interaction, 34, 5, pp. 399-409, (2018); Alsawaier R.S., The effect of gamification on motivation and engagement, The International Journal of Information and Learning Technology, 35, 1, pp. 56-79, (2018); Anderson K.C., Knight D.K., Pookulangar…		Springer Science and Business Media Deutschland GmbH	6.8	Theme 8: social media, social networking (online), knowledge, psychology	social media, social networking (online), knowledge, psychology	Q1	8	112	0.5845	0.1818	113.589	0.7384	0	0.5	0.2083	0.0694	5.2199	0.3385	0.096	0.3056	0.0183	0.4931	Q1: Core / Established	Q2: Mature / Potential
Cocosila M.; Archer N.	Adoption of mobile ICT for health promotion: An empirical investigation	2010	Electronic Markets	81	10.1007/s12525-010-0042-y	https://www.scopus.com/inward/record.uri?eid=2-s2.0-79951949562&doi=10.1007%2fs12525-010-0042-y&partnerID=40&md5=657446c1c97d5c88ef86eebecb83b996	This research is an unbiased empirical evaluation of user reasons to accept or resist a mobile information and communication technology (ICT) application for health promotion. This innovative use of mobile ICT consists of developing services that educate people to stay healthy, with clear benefits for both individuals and society. Receiving customized health advice through mobile devices may be a…	Health promotion; Mobile ICT; Motivation; Perceived risk; User adoption		Anna V., Jose-Maria B., Maria-Teresa D., Caterina G., Consolacion D., Dulcis S., Et al., The role of mobile phones in improving vaccination rates in travelers, Preventive Medicine, 38, pp. 503-509, (2004); Bauer S., Percevic R., Okon E., Meermann R., Kordy H., Use of text messaging in the aftercare of patients with bulimia nervosa, European Eating Disorders Review, 11, 3, pp. 279-290, (2003); Bon…			6.8	Theme 8: social media, social networking (online), knowledge, psychology	social media, social networking (online), knowledge, psychology	Q1	8	112	0.5845	0.1818	113.589	0.7384	0	0.5	0.2083	0.0694	5.2199	0.3385	0.096	0.3056	0.0183	0.4931	Q1: Core / Established	Q2: Mature / Potential
Simons L.P.A.; Hampe J.F.; Guldemond N.A.	ICT supported healthy lifestyle interventions: Design lessons	2014	Electronic Markets	23	10.1007/s12525-014-0157-7	https://www.scopus.com/inward/record.uri?eid=2-s2.0-84939879014&doi=10.1007%2fs12525-014-0157-7&partnerID=40&md5=1a349036df767c09556e3952f4695303	Healthy living is increasingly urgent, since it may help curb our escalating health care costs. ICT (Information and Communication Technology) offers healthy lifestyle support opportunities. Given the dose–response relation between health behaviors and -benefits, an important challenge is: how to motivate participants to large health behavior improvements? We conducted two design and test iterati…	Design; eCoach; eHealth; Health; Lifestyle intervention; Mobile health		Akter S.J., D'Ambra J., Ray P., Service quality of mHealth platforms: development and validation of a hierarchical model using PLS, Electronic Markets, 20, 3, pp. 209-227, (2010); Akter S., Ray P., D'Ambra J.G., Continuance of mHealth services at the bottom of the pyramid: the roles of service quality and trust, Electronic Markets (Special Theme), pp. 1-19, (2012); Alderfer C.P., An empirical tes…		Springer Verlag	6.8	Theme 5: health care, mhealth, india, internet of things	health care, mhealth, india, internet of things	Q1	5	136	0.2703	0.3017	47.4706	0.1609	0	0.5	0.6316	0.2105	5.3761	0.3943	0.0957	0.3027	0.015	0.3605	Q3: Niche / Transient	Q4: Frontier / Niche
Buettner R.	Getting a job via career-oriented social networking markets: The weakness of too many ties	2017	Electronic Markets	50	10.1007/s12525-017-0248-3	https://www.scopus.com/inward/record.uri?eid=2-s2.0-85014513200&doi=10.1007%2fs12525-017-0248-3&partnerID=40&md5=a8858efef39563f3ec9d38ac6832e4d1	While career-oriented social networking markets (CSNM) such as LinkedIn or XING are increasingly appreciated by a large number of internet users, our understanding of CSNM benefits and factors influencing the intention to use CSNM for a job search is very limited. For theoretical work on CSNM I extend Venkatesh’s et al. UTAUT2 model by presenting a new concept considering a user’s ties based on G…	Career-oriented social networking markets; e-HRM; Recruiting; Social media; Technology acceptance; Weak ties; XING		Akter S., Wamba S.F., Big data analytics in E-commerce: a systematic review and agenda for future research, Electronic Markets, 26, 2, pp. 173-194, (2016); Alchian A.A., Information costs, pricing and resource unemployment, Western Economic Journal, 7, 2, pp. 109-128, (1969); Alchian A.A., Demsetz H., Production, information costs, and economic organization, American Economic Review, 62, 5, pp. 7…		Springer Verlag	6.8	Theme 8: social media, social networking (online), knowledge, psychology	social media, social networking (online), knowledge, psychology	Q1	8	112	0.5845	0.1818	113.589	0.7384	0	0.5	0.2083	0.0694	5.2199	0.3385	0.096	0.3056	0.0183	0.4931	Q1: Core / Established	Q2: Mature / Potential
Sinha M.; Majra H.; Hutchins J.; Saxena R.	Mobile payments in India: the privacy factor	2019	International Journal of Bank Marketing	57	10.1108/IJBM-05-2017-0099	https://www.scopus.com/inward/record.uri?eid=2-s2.0-85053248448&doi=10.1108%2fIJBM-05-2017-0099&partnerID=40&md5=ee2cc733b51cb522ab6a9c7c5c5a4463	Purpose: The purpose of this paper is to understand Indian consumers’ intention to use mobile payments by examining their adoption readiness (AR) in the larger context of their technology readiness (TR) and their privacy concerns (PCs). Design/methodology/approach: A four-city, three language, paper and pencil survey yielded a sample of 600 respondents from India. Data were analyzed using structu…	Adoption readiness; Emerging markets; India; Mobile payments; Privacy concerns; Technology readiness		Ajzen I., The theory of planned behavior, Organizational Behavior and Human Decision Processes, 50, 2, pp. 179-211, (1991); Al-Ajm A., Nor M.K., Challenges of adoption of internet banking service in Yemen, International Journal of Bank Marketing, 33, 2, pp. 178-194, (2015); Amberber E., Vodafone launches Africa’s digital money M-Pesa in India; now your SIM is powered to pay for everything, (2014)…		Emerald Group Holdings Ltd.	6.9	Theme 5: health care, mhealth, india, internet of things	health care, mhealth, india, internet of things	Q1	5	136	0.2703	0.3017	47.4706	0.1609	0	0.5	0.6316	0.2105	5.3761	0.3943	0.0957	0.3027	0.015	0.3605	Q3: Niche / Transient	Q4: Frontier / Niche
Al-Ajam A.S.; Md Nor K.	Challenges of adoption of internet banking service in yemen	2015	International Journal of Bank Marketing	58	10.1108/IJBM-01-2013-0001	https://www.scopus.com/inward/record.uri?eid=2-s2.0-84958544964&doi=10.1108%2fIJBM-01-2013-0001&partnerID=40&md5=e0fbbc89e1b1f3c2c952c55891a8c0dd	Purpose – The purpose of this paper is to determine the factors that influence individuals’ intention to adopt internet banking in the Republic of Yemen. The current study found that a lack of empirical studies have been conducted in this field in Arab countries, in general, and in Yemen, in particular. Design/methodology/approach – The theory of reasoned action (TRA) was extended by relative adv…	Behavioural intention; Internet banking; Structural equation modeling; Technology readiness; Theory of reasoned action		Abushanab E., Pearson J.M., Setterstrom A.J., Internet banking and customers acceptance in Jordan: The unified model’s perspective”, Communications of the Association for Information Systems, 26, 23, pp. 494-524, (2010); Aderonke A., Charles A., An empirical investigation of the level of users acceptance of e-banking in Nigeria”, Journal of Internet Banking and Commerce, 15, 1, pp. 1-13, (2010); …		Emerald Group Publishing Ltd.	6.9	Theme 5: health care, mhealth, india, internet of things	health care, mhealth, india, internet of things	Q1	5	136	0.2703	0.3017	47.4706	0.1609	0	0.5	0.6316	0.2105	5.3761	0.3943	0.0957	0.3027	0.015	0.3605	Q3: Niche / Transient	Q4: Frontier / Niche
Joshi H.; Chawla D.	Identifying unobserved heterogeneity in mobile wallet adoption – A FIMIX-PLS approach for user segmentation	2023	International Journal of Bank Marketing	1	10.1108/IJBM-03-2022-0132	https://www.scopus.com/inward/record.uri?eid=2-s2.0-85141687426&doi=10.1108%2fIJBM-03-2022-0132&partnerID=40&md5=17f30ec3e3e5b014ee52f9de4a5cd8cb	Purpose: The purpose of this study is to segment mobile wallet users using a finite mixture partial least squares (FIMIX-PLS) approach and evaluate the unobserved heterogeneity across segments. Design/methodology/approach: Partial least square structural equation modeling (PLS-SEM) using a convenience sample of 744 responses was used to analyze the measurement, structural model and hypotheses tes…	FIMIX-PLS; India; Mobile wallet; PLS-SEM; Segmentation; TAM		Agarwal R., Rastogi S., Mehrotra A., Customers' perspectives regarding e-banking in an emerging economy, Journal of Retailing and Consumer Services, 16, 5, pp. 340-351, (2009); Akaike H., Information theory and an extension of the maximum likelihood principle, Paper Presented at Second International Symposium on Information Theory, pp. 267-281, (1973); Alavi S., Ahuja V., An empirical segmentatio…		Emerald Publishing	6.9	Theme 5: health care, mhealth, india, internet of things	health care, mhealth, india, internet of things	Q1	5	136	0.2703	0.3017	47.4706	0.1609	0	0.5	0.6316	0.2105	5.3761	0.3943	0.0957	0.3027	0.015	0.3605	Q3: Niche / Transient	Q4: Frontier / Niche
Chawla D.; Joshi H.	Consumer attitude and intention to adopt mobile wallet in India – An empirical study	2019	International Journal of Bank Marketing	186	10.1108/IJBM-09-2018-0256	https://www.scopus.com/inward/record.uri?eid=2-s2.0-85067883413&doi=10.1108%2fIJBM-09-2018-0256&partnerID=40&md5=33d566456d87142c6722bd3fb4323658	Purpose: The purpose of this paper is to empirically examine the factors that influence a consumer’s attitude and intention to use mobile wallets using a sample representative of Indian users. Design/methodology/approach: A multidisciplinary model is proposed, building on the technology acceptance model (TAM) and unified theory of acceptance and use of technology (UTAUT) and other relevant resear…	Adoption; Attitude; Banking; India		Aboelmaged M., Gebba T.R., Mobile banking adoption: an examination of technology acceptance model and theory of planned behavior, International Journal of Business Research and Development, 2, 1, pp. 719-729, (2013); Adams D.A., Nelson R.R., Todd P.A., Perceived usefulness, ease of use, and usage of information technology: a replication, MIS Quarterly, 16, 2, pp. 227-247, (1992); Agag G., El-Masr…		Emerald Group Holdings Ltd.	6.9	Theme 5: health care, mhealth, india, internet of things	health care, mhealth, india, internet of things	Q1	5	136	0.2703	0.3017	47.4706	0.1609	0	0.5	0.6316	0.2105	5.3761	0.3943	0.0957	0.3027	0.015	0.3605	Q3: Niche / Transient	Q4: Frontier / Niche
Kaabachi S.; Ben Mrad S.; O’Leary B.	Consumer’s initial trust formation in IOB’s acceptance: The role of social influence and perceived compatibility	2019	International Journal of Bank Marketing	29	10.1108/IJBM-12-2017-0270	https://www.scopus.com/inward/record.uri?eid=2-s2.0-85062641235&doi=10.1108%2fIJBM-12-2017-0270&partnerID=40&md5=12c0360dd9737ae6845b9bff22feff01	Purpose: The purpose of this paper is to explore how variables like propensity to trust, website usability, social influence, customer awareness about internet-only banks (IOBs) and perceived compatibility influence customers’ initial trust formation toward IOBs’ acceptance. The model is based on the technology acceptance model, diffusion of innovation theory and theory of reasoned action. Design…	Compatibility; Internet-only banks; Propensity to trust; Social influence; Trust		Ajzen I., Fishbein M., Understanding Attitudes and Predicting Social Behavior, (1980); Akhlaq A., Ahmed E., The effect of motivation on trust in the acceptance of internet banking in a low income country, International Journal of Bank Marketing, 31, 2, pp. 115-125, (2013); Al-Ajam A.S., Khalil M.N., Internet banking adoption: integrating technology acceptance model and trust, European Journal of …		Emerald Group Holdings Ltd.	6.9	Theme 10: retailing, mobile phone, shopping activity, social influence	retailing, mobile phone, shopping activity, social influence	Q1	10	90	0.5901	0.2244	68.1556	0.3416	0	0.5	0.0526	0.0175	4.2725	0	0.1463	0.8713	0.0249	0.75	Q1: Core / Established	Q1: Emerging / Growth
Glavee-Geo R.; Shaikh A.A.; Karjaluoto H.	Mobile banking services adoption in Pakistan: are there gender differences?	2017	International Journal of Bank Marketing	108	10.1108/IJBM-09-2015-0142	https://www.scopus.com/inward/record.uri?eid=2-s2.0-85029800113&doi=10.1108%2fIJBM-09-2015-0142&partnerID=40&md5=840e1abfea558cc7d1d7d80b0a5507e4	Purpose: The purpose of this paper is to provide a comprehensive insight into the deciding factors affecting an individual’s intention to adopt mobile banking (m-banking) services in Pakistan. Design/methodology/approach: A survey approach was used with a sample of 189 responses from across Pakistan. Multi-group analysis was performed in order to detect gender differences among men and women in t…	Developing country; Gender; Mobile banking adoption; Pakistan; Technology acceptance model; Theory of planned behavior		Aboelmaged M.G., Gebba T.R., Mobile banking adoption: an examination of technology acceptance model and theory of planed behavior, International Journal of Business Research and Development, 2, 1, pp. 35-50, (2013); Ajzen L., From intentions to actions: a theory of planned behavior, Action-Control: From Cognition to Behavior, pp. I 1-39, (1985); Ajzen I., The theory of planned behavior, Organizat…		Emerald Group Publishing Ltd.	6.9	Theme 10: retailing, mobile phone, shopping activity, social influence	retailing, mobile phone, shopping activity, social influence	Q1	10	90	0.5901	0.2244	68.1556	0.3416	0	0.5	0.0526	0.0175	4.2725	0	0.1463	0.8713	0.0249	0.75	Q1: Core / Established	Q1: Emerging / Growth
Hampshire C.	A mixed methods empirical exploration of UK consumer perceptions of trust, risk and usefulness of mobile payments	2017	International Journal of Bank Marketing	48	10.1108/IJBM-08-2016-0105	https://www.scopus.com/inward/record.uri?eid=2-s2.0-85019149365&doi=10.1108%2fIJBM-08-2016-0105&partnerID=40&md5=0bc305e90459327c4badd4b47816dcd6	Purpose: The purpose of this paper is to explore UK consumer perceptions of trust, risk and perceived usefulness of mobile payments through the use of sequential mixed methods. Design/methodology/approach: A post-positivist philosophy is used with a social constructionist ontology with a questionnaire as the first survey instrument using an empirical sequential mixed methods approach. Summary qua…	Contactless payments; Mobile payments; Mobile phone; Perceived risk; Perceived trust; Perceived usefulness		Anderson E., Weitz B., Determinants of continuity in conventional industrial channel dyads, Marketing Science, 8, 4, pp. 310-314, (1989); Apple online store, (2014); Arvidsson N., Consumer attitudes on mobile payment services – results from a proof of concept test, International Journal of Bank Marketing, 32, 2, pp. 150-170, (2014); Bews N.F., Rossouw G.J., The role of business ethics in facilita…		Emerald Group Publishing Ltd.	6.9	Theme 10: retailing, mobile phone, shopping activity, social influence	retailing, mobile phone, shopping activity, social influence	Q1	10	90	0.5901	0.2244	68.1556	0.3416	0	0.5	0.0526	0.0175	4.2725	0	0.1463	0.8713	0.0249	0.75	Q1: Core / Established	Q1: Emerging / Growth
Tran H.T.T.; Corner J.	The impact of communication channels on mobile banking adoption	2016	International Journal of Bank Marketing	75	10.1108/IJBM-06-2014-0073	https://www.scopus.com/inward/record.uri?eid=2-s2.0-84954411156&doi=10.1108%2fIJBM-06-2014-0073&partnerID=40&md5=c9d8e194e94864fafff073f305c45645	Purpose – The purpose of this paper is to investigate the distinct effects of different communication channels, particularly interpersonal networks, social media, and mass media on customer beliefs and usage intention in a mobile banking (MB) context. Design/methodology/approach – This study employed a combination of both qualitative and quantitative research approaches with an exploratory sequen…	Communication channels; Face-to-face communication; Innovation diffusion; Mass media; Mobile banking; Social media		Aboelmaged M., Gebba T.R., Mobile banking adoption: an examination of technology acceptance model and theory of planned behaviour, International Journal of Business Research and Development (IJBRD), 2, 1, pp. 35-50, (2013); Ajzen I., The theory of planned behaviour, Organizational Behaviour and Human Decision Processes, 50, 2, pp. 179-211, (1991); Ajzen I., Fishbein M., The prediction of behaviou…		Emerald Group Publishing Ltd.	6.9	Theme 2: china, investments, electric vehicle, electric vehicles	china, investments, electric vehicle, electric vehicles	Q1	2	462	0.2421	0.3314	47.0952	0.1576	0	0.5	0.4028	0.1343	6.843	0.9185	0.0957	0.3025	0.0068	0.0356	Q4: Emerging / Structural	Q4: Frontier / Niche
Mortimer G.; Neale L.; Hasan S.F.E.; Dunphy B.	Investigating the factors influencing the adoption of m-banking: A cross cultural study	2015	International Journal of Bank Marketing	121	10.1108/IJBM-07-2014-0100	https://www.scopus.com/inward/record.uri?eid=2-s2.0-84947049249&doi=10.1108%2fIJBM-07-2014-0100&partnerID=40&md5=b0ee340a8088334822c1cd223f00d469	Purpose – Little is known about the adoption of mobile banking technologies in emerging Asian economies. The purpose of this paper is to empirically examine the motivators that influence a consumer’s intentions to use mobile banking. Design/methodology/approach – A web-based survey was employed to collect data from 348 respondents, split across Thailand and Australia. Data were analysed by employ…	Australia; M-banking; Mobile banking adoption; Self-service technology; Technology acceptance theory; Thailand		Population by Age and Sex, Australian States and Territories, (2010); Adams D.A., Nelson R.R., Todd P.A., Perceived usefulness, ease of use, and usage of information technology: A replication, MIS Quarterly, 16, 2, pp. 227-247, (1992); Agarwal R., Rastogi S., Mehrotra A., Customers' perspectives regarding e-banking in an emerging economy, Journal of Retailing and Consumer Services, 16, 5, pp. 340…		Emerald Group Publishing Ltd.	6.9	Theme 2: china, investments, electric vehicle, electric vehicles	china, investments, electric vehicle, electric vehicles	Q1	2	462	0.2421	0.3314	47.0952	0.1576	0	0.5	0.4028	0.1343	6.843	0.9185	0.0957	0.3025	0.0068	0.0356	Q4: Emerging / Structural	Q4: Frontier / Niche
Yadav R.; Chauhan V.; Pathak G.S.	Intention to adopt internet banking in an emerging economy: A perspective of Indian youth	2015	International Journal of Bank Marketing	54	10.1108/IJBM-06-2014-0075	https://www.scopus.com/inward/record.uri?eid=2-s2.0-84947074762&doi=10.1108%2fIJBM-06-2014-0075&partnerID=40&md5=eda1b5e8df553f6dd0f189aa68ae2236	Purpose – The purpose of this paper is to understand the consumer’s intention toward internet banking adoption in Indian context by combining two theories; theory of planned behavior (TPB), technology acceptance model (TAM) and an additional construct, i.e. perceived risk. Design/methodology/approach – A questionnaire based survey was conducted to collect responses from young consumers (210 usabl…	India; Internet banking; Perceived risk; Technology acceptance model; Theory of planned behaviour		Agarwal R., Rastogi S., Mehrotra A., Customers' perspectives regarding e-banking in an emerging economy, Journal of Retailing and Consumer Services, 16, 5, pp. 340-351, (2009); Ajzen I., From intentions to actions: A theory of planned behavior, Action Control: From Cognition to Behavior, pp. 11-39, (1985); Ajzen I., Attitudes, Personality and Behavior, (1988); Ajzen I., The theory of planned beha…		Emerald Group Publishing Ltd.	6.9	Theme 5: health care, mhealth, india, internet of things	health care, mhealth, india, internet of things	Q1	5	136	0.2703	0.3017	47.4706	0.1609	0	0.5	0.6316	0.2105	5.3761	0.3943	0.0957	0.3027	0.015	0.3605	Q3: Niche / Transient	Q4: Frontier / Niche
Kesharwani A.; Bisht S.S.	The impact of trust and perceived risk on internet banking adoption in India: An extension of technology acceptance model	2012	International Journal of Bank Marketing	332	10.1108/02652321211236923	https://www.scopus.com/inward/record.uri?eid=2-s2.0-84861818764&doi=10.1108%2f02652321211236923&partnerID=40&md5=8f313c78469007736e4da325912a4dc3	Purpose: The main purpose of this paper is to extend the technology acceptance model (TAM) in the context of internet banking adoption in India under security and privacy threat. Design/methodology/approach: Keeping the TAM proposed by Davis as a theoretical basis, an extended TAM incorporating security- and privacy-related issues for internet banking adoption is conceptualized. The authors have …	Consumer behaviour; India; Internet banking; Perceived risk; Perception; Technology Acceptance Model; Trust; Virtual banking		Agarwal R., Prasad J., The role of innovation characteristics and perceived voluntariness in the acceptance of information technologies, Decision Sciences, 28, 3, pp. 557-582, (1997); Agarwal R., Prasad J., The antecedents and consequents of user perceptions in information technology acceptance, Decision Support Systems, 22, 1, pp. 15-29, (1998); Agarwal R., Prasad J., Are individual differences …		Emerald Group Publishing Ltd.	6.9	Theme 5: health care, mhealth, india, internet of things	health care, mhealth, india, internet of things	Q1	5	136	0.2703	0.3017	47.4706	0.1609	0	0.5	0.6316	0.2105	5.3761	0.3943	0.0957	0.3027	0.015	0.3605	Q3: Niche / Transient	Q4: Frontier / Niche
Wessels L.; Drennan J.	An investigation of consumer acceptance of M-banking	2010	International Journal of Bank Marketing	207	10.1108/02652321011085194	https://www.scopus.com/inward/record.uri?eid=2-s2.0-78049519124&doi=10.1108%2f02652321011085194&partnerID=40&md5=c65d845b03247ac5c2b797f383773f60	Purpose: This paper aims to identify and test the key motivators and inhibitors for consumer acceptance of mobile phone banking (M-banking), particularly those that affect the consumer's attitude towards, and intention to use, this self-service banking technology. Design/methodology/approach: A web-based survey was undertaken where respondents completed a questionnaire about their perceptions of …	Australia; Banking; Consumer behaviour; Mobile communications systems		Andrews L., Kiel G., Drennan J., Boyle M., Weerawardena J., Gendered perceptions of experiential value in using web-based retail channels, European Journal of Marketing, 41, 5-6, pp. 640-649, (2007); ACNielson, Aussie consumers choose Internet banking over ATM, phone and branch, (2007); Ajzen I., Fishbein M., Understanding Attitudes and Predicting Consumer Behaviour, (1980); Al-Ashban A.A., Burne…		Emerald Group Publishing Ltd.	6.9	Theme 2: china, investments, electric vehicle, electric vehicles	china, investments, electric vehicle, electric vehicles	Q1	2	462	0.2421	0.3314	47.0952	0.1576	0	0.5	0.4028	0.1343	6.843	0.9185	0.0957	0.3025	0.0068	0.0356	Q4: Emerging / Structural	Q4: Frontier / Niche
Zhou Q.; Sotiriadis M.; Shen S.	Using TikTok in tourism destination choice: A young Chinese tourists' perspective	2023	Tourism Management Perspectives	11	10.1016/j.tmp.2023.101101	https://www.scopus.com/inward/record.uri?eid=2-s2.0-85150382640&doi=10.1016%2fj.tmp.2023.101101&partnerID=40&md5=f5af71c6e301ad80c6fc10e23feeab2f	This study adopted the unified theory of acceptance and use of technology 2 to investigate the influence of TikTok on the travel decision-making of young Chinese tourists. The model was further adapted by introducing the variable of perceived trust and using age as a moderating variable, to examine the differences between millennials and Generation Z. The findings of multiple cluster analysis and…	China; Destination marketing; Generation Z; Millennials; TikTok; Tourists' decision-making		Agag G., El-Masry A.A., Understanding consumer intention to participate in online travel community and effects on consumer intention to purchase travel online and WOM: An integration of innovation diffusion theory and TAM with trust, Computers in Human Behavior, 60, pp. 97-111, (2016); Alonso A., Borrajo M., Yi L., Are social media data pushing overtourism? The case of Barcelona and Chinese touri…		Elsevier B.V.	6.9	Theme 2: china, investments, electric vehicle, electric vehicles	china, investments, electric vehicle, electric vehicles	Q1	2	462	0.2421	0.3314	47.0952	0.1576	0	0.5	0.4028	0.1343	6.843	0.9185	0.0957	0.3025	0.0068	0.0356	Q4: Emerging / Structural	Q4: Frontier / Niche
Medeiros M.; Ozturk A.; Hancer M.; Weinland J.; Okumus B.	Understanding travel tracking mobile application usage: An integration of self determination theory and UTAUT2	2022	Tourism Management Perspectives	28	10.1016/j.tmp.2022.100949	https://www.scopus.com/inward/record.uri?eid=2-s2.0-85125657321&doi=10.1016%2fj.tmp.2022.100949&partnerID=40&md5=85e893a1bb1a0ef7a9c873d28cae0c0b	By integrating the Self-Determination Theory (Deci & Ryan 1985) and a modified version of the Unified Theory of Acceptance and Use of Technology 2 (UTAUT2) framework (Venkatesh et al., 2012), this study aimed to investigate factors affecting travelers' intention to share their travel-related information on travel tracking mobile applications (TTMA). The proposed model was tested via structural eq…	Self-determination theory; Social media; Technology acceptance; Travel mobile applications; UTAUT2		Alalwan A.A., Dwivedi Y.K., Rana N.P., Factors influencing adoption of mobile banking by Jordanian bank customers: Extending UTAUT2 with trust, International Journal of Information Management, 37, 3, pp. 99-110, (2017); Ali T., Marc B., Omar B., Soulaimane K., Larbi S., Exploring destination's negative e-reputation using aspect based sentiment analysis approach: Case of Marrakech destination on T…		Elsevier B.V.	6.9	Theme 8: social media, social networking (online), knowledge, psychology	social media, social networking (online), knowledge, psychology	Q1	8	112	0.5845	0.1818	113.589	0.7384	0	0.5	0.2083	0.0694	5.2199	0.3385	0.096	0.3056	0.0183	0.4931	Q1: Core / Established	Q2: Mature / Potential
Thirumaran K.; Chawla S.; Dillon R.; Sabharwal J.K.	Virtual pets want to travel: Engaging visitors, creating excitement	2021	Tourism Management Perspectives	3	10.1016/j.tmp.2021.100859	https://www.scopus.com/inward/record.uri?eid=2-s2.0-85111161273&doi=10.1016%2fj.tmp.2021.100859&partnerID=40&md5=9fbc428ed8a3085705f58bad551290de	This paper proposes a gamified approach to promote tourism attractions based on users' interaction with a virtual pet in the context of an AR mobile application. Technology Acceptance Model, 6–11 Framework and Persuasive Systems Design are combined, to extract factors influencing the intention to travel with the virtual pet. A survey questionnaire was developed and administered online to 539 part…	6–11 framework; Augmented reality; Mobile games; Persuasive systems design; Technology acceptance model; Tourism marketing; Virtual pets; Virtual travel companions		Alha K., Koskinen E., Paavilainen J., Hamari J., Why do people play location-based augmented reality games: A study on Pokémon GO, Computers in Human Behavior, 93, pp. 114-122, (2019); Althoff T., White R.W., Horvitz E., Influence of Pokémon GO on physical activity: Study and implications, Journal of Medical Internet Research, 18, 12, (2016); Aluri A., Mobile augmented reality (MAR) game as a tra…		Elsevier B.V.	6.9	Theme 9: virtual reality, tourism, travel behavior, tourist destination	virtual reality, tourism, travel behavior, tourist destination	Q1	9	131	0.615	0.2999	73.1527	0.3852	0	0.5	0.4167	0.1389	4.9732	0.2504	0.1577	1	0.0208	0.5899	Q1: Core / Established	Q1: Emerging / Growth
Kim M.J.; Hall C.M.	What drives visitor economy crowdfunding? The effect of digital storytelling on unified theory of acceptance and use of technology	2020	Tourism Management Perspectives	40	10.1016/j.tmp.2020.100638	https://www.scopus.com/inward/record.uri?eid=2-s2.0-85080035771&doi=10.1016%2fj.tmp.2020.100638&partnerID=40&md5=db04c01772087341315bdea9391dbf6d	Digital storytelling is a key factor used by fundraisers to attract investors to crowdfunding projects. Despite the important role of digital storytelling in consumer persuasion, research on the effect of digital storytelling on consumer behavior is scarce in the visitor economy crowdfunding sector. The objective of this work is to create and verify a theoretically integrated research framework i…	Crowdfunding; Digital storytelling; Leisure and tourism-related fields; South Korea; Unified theory of acceptance and use of technology (UTAUT); Visitor economy		Akgun A.E., Keskin H., Ayar H., Erdogan E., The influence of storytelling approach in travel writings on readers’ empathy and travel intentions, Procedia - Social and Behavioral Sciences, 207, pp. 577-586, (2015); Albayrak T., Caber M., Comen N., Tourist shopping: The relationships among shopping attributes, shopping value, and behavioral intention, Tourism Management Perspectives, 18, pp. 98-106…		Elsevier B.V.	6.9	Theme 9: virtual reality, tourism, travel behavior, tourist destination	virtual reality, tourism, travel behavior, tourist destination	Q1	9	131	0.615	0.2999	73.1527	0.3852	0	0.5	0.4167	0.1389	4.9732	0.2504	0.1577	1	0.0208	0.5899	Q1: Core / Established	Q1: Emerging / Growth
Cai W.; McKenna B.	Power and Resistance: Digital-Free Tourism in a Connected World	2023	Journal of Travel Research	15	10.1177/00472875211061208	https://www.scopus.com/inward/record.uri?eid=2-s2.0-85120467944&doi=10.1177%2f00472875211061208&partnerID=40&md5=a20acb765919596bd91f6af005ec51ff	Although digital-free tourism is growing in popularity, research in this area has not unpacked the complex power relations between humans and technology through a critical perspective. Building on Foucault’s analysis of power and resistance, we theorized technology as disciplinary power and conducted a collaborative autoethnography to explore how individuals resist the dominant discourse. Through…	autoethnography; digital-free tourism; disciplinary power; Foucault; resistance	ethnography; power relations; technology adoption; theoretical study; tourism development; tourism economics; tourism market	Allen A., Foucault and the Politics of Our Selves, History of the Human Sciences, 24, 4, pp. 43-59, (2011); Anderson L., Analytic Autoethnography, Journal of Contemporary Ethnography, 35, 4, (2006); Andrade A.D., Techatassanasoontorn A.A., Digital Enforcement: Rethinking the Pursuit of a Digitally-Enabled Society, Information Systems Journal, 31, (2021); Bochner A.P., Criteria Against Ourselves, …		SAGE Publications Ltd	7	Theme 9: virtual reality, tourism, travel behavior, tourist destination	virtual reality, tourism, travel behavior, tourist destination	Q1	9	131	0.615	0.2999	73.1527	0.3852	0	0.5	0.4167	0.1389	4.9732	0.2504	0.1577	1	0.0208	0.5899	Q1: Core / Established	Q1: Emerging / Growth
Jeong M.; Shin H.H.	Tourists’ Experiences with Smart Tourism Technology at Smart Destinations and Their Behavior Intentions	2020	Journal of Travel Research	155	10.1177/0047287519883034	https://www.scopus.com/inward/record.uri?eid=2-s2.0-85075141491&doi=10.1177%2f0047287519883034&partnerID=40&md5=f73d8ba318f32e4c21d29c5372cea7ae	This study attempts to assess how tourists use smart tourism technologies at destinations and measure the effects of STT usage on overall travel experience and future revisit intention. Although STTs have received growing attention, little research has evaluated tourists’ experience with STTs available at various smart tourism destinations and potential consequences. Building on studies on online…	memorable experience; revisit intention; smart tourism; smart tourism destination; smart tourism technology	United States; memory; technology adoption; tourism development; tourism management; tourist behavior; tourist destination	Ajzen I., The Theory of Planned Behavior, Organizational Behavior and Human Decision Processes, 50, 2, pp. 179-211, (1991); Alba J., Lynch J., Weitz B., Janiszewski C., Lutz R., Sawyer A., Wood S., Interactive Home Shopping: Consumer, Retailer, and Manufacturer Incentives to Participate in Electronic Marketplaces, Journal of Marketing, 61, 3, pp. 38-53, (1997); Anderson E.W., Sullivan M.W., The A…		SAGE Publications Ltd	7	Theme 9: virtual reality, tourism, travel behavior, tourist destination	virtual reality, tourism, travel behavior, tourist destination	Q1	9	131	0.615	0.2999	73.1527	0.3852	0	0.5	0.4167	0.1389	4.9732	0.2504	0.1577	1	0.0208	0.5899	Q1: Core / Established	Q1: Emerging / Growth
Yang Y.; Liu H.; Li X.	The World Is Flatter? Examining the Relationship between Cultural Distance and International Tourist Flows	2019	Journal of Travel Research	73	10.1177/0047287517748780	https://www.scopus.com/inward/record.uri?eid=2-s2.0-85048297254&doi=10.1177%2f0047287517748780&partnerID=40&md5=756b9c907cffb050d7c605a25c01a3ae	Geographic distance has been studied extensively as an obstructer of tourism flows, whereas another distance measure, cultural distance (CD), receives less attention in tourism demand research. Using international tourist arrival data between 94 countries for the period 1995–2012, we estimate several Poisson gravity models incorporating a CD measure based on national cultural scores from the Worl…	cultural distance; economic globalization; international tourist flows; Poisson gravity model; technology advancement	globalization; international tourism; model test; technological development; technology adoption; tourist destination; trend analysis	Alegre J., Cladera M., Tourist Expenditure and Quality: Why Repeat Tourists Can Spend Less Than First-Timers, Tourism Economics, 16, 3, pp. 517-533, (2010); Alegre J., Juaneda C., Destination Loyalty: Consumers’ Economic Behavior, Annals of Tourism Research, 33, 3, pp. 684-706, (2006); Becken S., Carmignani F., Does Tourism Lead to Peace?, Annals of Tourism Research, 61, pp. 63-79, (2016); Camero…		SAGE Publications Ltd	7	Theme 9: virtual reality, tourism, travel behavior, tourist destination	virtual reality, tourism, travel behavior, tourist destination	Q1	9	131	0.615	0.2999	73.1527	0.3852	0	0.5	0.4167	0.1389	4.9732	0.2504	0.1577	1	0.0208	0.5899	Q1: Core / Established	Q1: Emerging / Growth
Tussyadiah I.P.; Jung T.H.; tom Dieck M.C.	Embodiment of Wearable Augmented Reality Technology in Tourism Experiences	2018	Journal of Travel Research	191	10.1177/0047287517709090	https://www.scopus.com/inward/record.uri?eid=2-s2.0-85032003046&doi=10.1177%2f0047287517709090&partnerID=40&md5=02173ad86a62af8b4c6f38ad35c876b4	The increasing use of wearable devices for tourism purposes sets the stage for a critical discussion on technological mediation in tourism experiences. This article provides a theoretical reflection on the phenomenon of embodiment relation in technological mediation and then assesses the embodiment of wearable augmented reality technology in a tourism attraction. The findings suggest that technol…	augmented reality; Google Glass; technology embodiment; technology mediation; tourism experience; wearable technology	information technology; technological development; technology adoption; tourism development; tourist attraction; World Wide Web	Anderson J.C., Gerbing D.W., Structural Equation Modeling in Practice: A Review and Recommended Two-Step Approach, Psychological Bulletin, 103, 3, (1988); Azuma R.T., A Survey of Augmented Reality, Presence: Teleoperators and Virtual Environments, 6, 4, (1997); Barfield W., Bressler D.M., Bodzin A.M., A Mixed Methods Assessment of Students’ Flow Experiences during a Mobile Augmented Reality Scien…		SAGE Publications Ltd	7	Theme 9: virtual reality, tourism, travel behavior, tourist destination	virtual reality, tourism, travel behavior, tourist destination	Q1	9	131	0.615	0.2999	73.1527	0.3852	0	0.5	0.4167	0.1389	4.9732	0.2504	0.1577	1	0.0208	0.5899	Q1: Core / Established	Q1: Emerging / Growth
Agag G.M.; El-Masry A.A.	Why Do Consumers Trust Online Travel Websites? Drivers and Outcomes of Consumer Trust toward Online Travel Websites	2017	Journal of Travel Research	168	10.1177/0047287516643185	https://www.scopus.com/inward/record.uri?eid=2-s2.0-85011924050&doi=10.1177%2f0047287516643185&partnerID=40&md5=502729b81034357a92afd69ef21358cf	Egypt is currently one of the leading nations especially in the Middle East region with a well-established e-commerce environment and advanced IT infrastructure, but rapid growth of e-commerce will soon occur in other nations with similar consumption patterns. This study tests a model of antecedents (consumer experience, propensity to trust, reputation, perceived website size, ease of use, percei…	attitude; intentions to purchase; online travel shopping; online trust; perceived risk	Egypt; attitudinal survey; consumption behavior; electronic commerce; information and communication technology; Internet; perception; technology adoption; tourist destination	Aaker D.A., Kumar V., Day G.S., Marketing Research, (2007); Adams D., Nelson R.R., Todd P.A., Perceived Usefulness, Ease of Use, and Usage of Information Technology: A Replication, MIS Quarterly, 16, 2, pp. 227-247, (1992); Agag G., El-Masry A., Understanding Consumer Intention to Participate in Online Travel Community and Effects on Consumer Intention to Purchase Travel Online and WOM: An Integr…		SAGE Publications Ltd	7	Theme 9: virtual reality, tourism, travel behavior, tourist destination	virtual reality, tourism, travel behavior, tourist destination	Q1	9	131	0.615	0.2999	73.1527	0.3852	0	0.5	0.4167	0.1389	4.9732	0.2504	0.1577	1	0.0208	0.5899	Q1: Core / Established	Q1: Emerging / Growth
Lamsfus C.; Wang D.; Alzua-Sorzabal A.; Xiang Z.	Going Mobile: Defining Context for On-the-Go Travelers	2015	Journal of Travel Research	147	10.1177/0047287514538839	https://www.scopus.com/inward/record.uri?eid=2-s2.0-84943272543&doi=10.1177%2f0047287514538839&partnerID=40&md5=8b3fd4581f040a520188d05fc1df3b51	Travel behavior is becoming inherently dynamic and socially connected because of the increasing use of mobile technologies; as such, the concept of context is becoming increasingly important in travel and tourism and particularly within today’s technology-supported mobile environment. This article builds upon existing literature describing recent developments in context-aware system design with t…	context; context-awareness; mobile computing; on-the-go travel; travel behavior	conceptual framework; mobile communication; research; technology adoption; tourism; travel behavior	Anegg H., Kunczier H., Michlmayr E., Pospischil G., Umlauft M., LoL@: Designing a Location Based UMTS Application, e&i Elektrotechnik und Informationstechnik, 119, 2, pp. 48-51, (2002); Ark W., Selker T., A Look at Human Interaction with Pervasive Computers, IBM Systems Journal, 38, 4, pp. 504-507, (1999); Atzori L., Iera A., Morabito G., The Internet of Things: A Survey, Computer Networks, 54, 1…		SAGE Publications Ltd	7	Theme 9: virtual reality, tourism, travel behavior, tourist destination	virtual reality, tourism, travel behavior, tourist destination	Q1	9	131	0.615	0.2999	73.1527	0.3852	0	0.5	0.4167	0.1389	4.9732	0.2504	0.1577	1	0.0208	0.5899	Q1: Core / Established	Q1: Emerging / Growth
Fuchs M.; Höpken W.; Föger A.; Kunz M.	E-business readiness, intensity, and impact: An Austrian destination management organization study	2010	Journal of Travel Research	66	10.1177/0047287509336469	https://www.scopus.com/inward/record.uri?eid=2-s2.0-77953145746&doi=10.1177%2f0047287509336469&partnerID=40&md5=48a674fb8184eca1e7dbee92be465c86	The majority of today's information and communication technology (ICT) impact studies disregard infrastructural, organizational, and environmental factors typically responsible for successful e-business adoption and use. This article proposes an empirical approach that shows how the mentioned factors determine both e-business adoption and the impact of information and communication technologies. …	Destination management organizations; E-business adoption; ICT impact; SEM; Technology diffusion	Austria; electronic commerce; empirical analysis; information and communication technology; innovation; technology adoption; technology diffusion; tourism management; tourist destination	Amit R., Zott C., Value Creation in e-Business, Strategic Management Journal, 22, 3, pp. 493-520, (2001); Brown T.A., Confirmatory Factor Analysis for Applied Research, (2006); Brynjolfsson E., Hitt L.M., Beyond Computation: Information Technology, Organization Transformation and Business Performance, Journal of Economic Perspectives, 14, 4, pp. 435-456, (2000); Buhalis D., Information and Teleco…		SAGE Publications Ltd	7	Theme 9: virtual reality, tourism, travel behavior, tourist destination	virtual reality, tourism, travel behavior, tourist destination	Q1	9	131	0.615	0.2999	73.1527	0.3852	0	0.5	0.4167	0.1389	4.9732	0.2504	0.1577	1	0.0208	0.5899	Q1: Core / Established	Q1: Emerging / Growth
El-Said O.; Aziz H.	Virtual Tours a Means to an End: An Analysis of Virtual Tours’ Role in Tourism Recovery Post COVID-19	2022	Journal of Travel Research	144	10.1177/0047287521997567	https://www.scopus.com/inward/record.uri?eid=2-s2.0-85102679176&doi=10.1177%2f0047287521997567&partnerID=40&md5=e4f7a78aa33b538e09a6daa6a0b9c126	COVID-19 brought the global tourism industry to a standstill. In response, various tourism stakeholders adopted innovative approaches such as virtual tours (VTs) to keep their attractions firmly in the minds of potential visitors. This study has integrated the Technology Acceptance Model (TAM) and Protective Action Decision Model (PADM) models to determine the factors that affect a person’s decis…	corona virus; crisis management; heritage management; PADM; pandemic; TAM; tourism promotion; visit intention	Egypt; COVID-19; crisis management; tourism development; tourism management; virtual reality	Aguilera J., Alonso F., Gomez J., Generating Three-Dimensional Virtual Tours from Two-Dimensional Images, (2014); Anderson J., Gerbing D., Structural Equation Modeling in Practice: A Review and Recommended Two-Step Approach, Psychological Bulletin, 103, 3, (1988); Barbieri L., Bruno F., Muzzupappa M., Virtual Museum System Evaluation through User Studies, Journal of Cultural Heritage, 26, (2017);…		SAGE Publications Ltd	7	Theme 9: virtual reality, tourism, travel behavior, tourist destination	virtual reality, tourism, travel behavior, tourist destination	Q1	9	131	0.615	0.2999	73.1527	0.3852	0	0.5	0.4167	0.1389	4.9732	0.2504	0.1577	1	0.0208	0.5899	Q1: Core / Established	Q1: Emerging / Growth
Chi O.H.; Gursoy D.; Chi C.G.	Tourists’ Attitudes toward the Use of Artificially Intelligent (AI) Devices in Tourism Service Delivery: Moderating Role of Service Value Seeking	2022	Journal of Travel Research	58	10.1177/0047287520971054	https://www.scopus.com/inward/record.uri?eid=2-s2.0-85096454485&doi=10.1177%2f0047287520971054&partnerID=40&md5=0916ad5b140d33a2b8abe261d083880b	This study examines tourists’ attitudes toward the use of artificially intelligent (AI) devices in either relatively more utilitarian or hedonic tourism services (airline and hospitality services, respectively). Findings suggest that tourists’ acceptance of the use of AI devices in both service contexts is influenced by social influence, hedonic motivation, anthropomorphism, performance and effor…	artificial intelligence; hedonic value; technology acceptance; tourism services; utilitarian value	airline industry; artificial intelligence; hedonic analysis; hospitality industry; performance assessment; service quality; service sector; tourism economics; tourist attraction; tourist behavior	Ackerman E., Study: Nobody Wants Social Robots That Look Like Humans Because They Threaten Our Identity, IEEE Spectrum, pp. 1-5, (2016); Ai J., Chi O.H., Ouyang Z., Categorizing Peer-to-Peer Review Site Features and Examining Their Impacts on Room Sales, Journal of Hospitality Marketing & Management, 28, 7, (2019); Ayeh J.K., Au N., Law R., Investigating Across-National Heterogeneity in the Adopt…		SAGE Publications Ltd	7	Theme 9: virtual reality, tourism, travel behavior, tourist destination	virtual reality, tourism, travel behavior, tourist destination	Q1	9	131	0.615	0.2999	73.1527	0.3852	0	0.5	0.4167	0.1389	4.9732	0.2504	0.1577	1	0.0208	0.5899	Q1: Core / Established	Q1: Emerging / Growth
Lee T.H.; Jan F.-H.	Ecotourism Behavior of Nature-Based Tourists: An Integrative Framework	2018	Journal of Travel Research	126	10.1177/0047287517717350	https://www.scopus.com/inward/record.uri?eid=2-s2.0-85049015593&doi=10.1177%2f0047287517717350&partnerID=40&md5=5c62b04c7de5684661f997bd266697bc	This study aims to examine an ecotourism behavioral model using environmental attitude, subjective norms, perceived behavioral control, perceived ecotourism usefulness, biospheric value, ecotourism self-identity, ecotourism behavioral intention, and ecotourism behavior among nature-based tourists. The analysis tested ten hypotheses and integrated the theory of planned behavior, the technology acc…	ecotourism behavior; environmental attitude; integrative framework; Taiwan	Taiwan; ecotourism; environmental values; social theory; tourism development; tourist behavior; tourist destination	Abrahamse W., Steg L., Factors Related to Household Energy Use and Intention to Reduce It: The Role of Psychological and Socio-demographic Variables, Human Ecology Review, 18, 1, pp. 30-40, (2011); Ahn M., Kang J., Hustvedt G., A Model of Sustainable Household Technology Acceptance, International Journal of Consumer Studies, 40, 1, pp. 83-91, (2016); Ajzen I., The Theory of Planned Behavior, Orga…		SAGE Publications Ltd	7	Theme 9: virtual reality, tourism, travel behavior, tourist destination	virtual reality, tourism, travel behavior, tourist destination	Q1	9	131	0.615	0.2999	73.1527	0.3852	0	0.5	0.4167	0.1389	4.9732	0.2504	0.1577	1	0.0208	0.5899	Q1: Core / Established	Q1: Emerging / Growth
Kaplanidou K.; Vogt C.	A structural analysis of destination travel intentions as a function of web site features	2006	Journal of Travel Research	142	10.1177/0047287506291599	https://www.scopus.com/inward/record.uri?eid=2-s2.0-33749637835&doi=10.1177%2f0047287506291599&partnerID=40&md5=d13490ae50ddc61e5e129d24618723a5	This study used the technology acceptance model to assess the influence of tourism Web site characteristics on perceived Web site usefulness in planning a trip. Furthermore, the impact of Web site usefulness on intentions to travel to a destination was examined using structural equation modeling analysis. Consumer characteristics such as previous visits to the destination or its Web site, online …	Accessibility; Ease of Web site navigation; Information functionality; Intent to travel; Visuals; Web site usefulness	numerical model; tourism; tourist destination; travel behavior; World Wide Web	Ajzen I., Fishbein M., Understanding Attitudes and Predicting Social Behavior, (1980); Anderson J.C., Gerbing D.W., Structural Equation Modeling in Practice: A Review and Recommended Two Step Approach, Psychological Bulletin, 103, 3, pp. 411-423, (1988); Bandalos D.L., Finney S.J., Item Parceling Issues in Structural Equation Modeling, New Developments and Techniques in Structural Equation Modeli…		SAGE Publications Ltd	7	Theme 9: virtual reality, tourism, travel behavior, tourist destination	virtual reality, tourism, travel behavior, tourist destination	Q1	9	131	0.615	0.2999	73.1527	0.3852	0	0.5	0.4167	0.1389	4.9732	0.2504	0.1577	1	0.0208	0.5899	Q1: Core / Established	Q1: Emerging / Growth
Sohn E.; Seamans R.; Sands D.B.	Technology adoption and innovation: The establishment of airmail and aviation innovation in the United States, 1918–1935	2024	Strategic Management Journal	0	10.1002/smj.3555	https://www.scopus.com/inward/record.uri?eid=2-s2.0-85171526120&doi=10.1002%2fsmj.3555&partnerID=40&md5=be411429bb22770c62903b76241f8b3e	Research Summary: This article explores how technology adoption can shape innovative activity. We study this issue within the historical context of the introduction and expansion of airmail across the United States between 1918 and 1935 using archival material and a novel dataset of early 20th century patents. A joint qualitative and quantitative investigation indicates that local individual and …	aviation industry; business and economic history; geography of innovation; industry formation; local innovation; patent portfolios; technology adoption; technology strategy	Aircraft; Economics; Aviation industry; Business and economic history; Business and economics; Corporates; Geography of innovation; Industry formation; Local innovation; Patent portfolio; Technology adoption; Technology strategies; Patents and inventions	Adams P., Fontana R., Malerba F., User-industry spinouts: Downstream industry knowledge as a source of new firm entry and survival, Organization Science, 27, 1, pp. 18-35, (2015); Agarwal R., Braguinsky S., Ohyama A., Centers of gravity: The effect of stable shared leadership in top management teams on firm growth and industry evolution, Strategic Management Journal, 41, 3, pp. 467-498, (2020); A…		John Wiley and Sons Ltd	7.2	Theme 2: china, investments, electric vehicle, electric vehicles	china, investments, electric vehicle, electric vehicles	Q1	2	462	0.2421	0.3314	47.0952	0.1576	0	0.5	0.4028	0.1343	6.843	0.9185	0.0957	0.3025	0.0068	0.0356	Q4: Emerging / Structural	Q4: Frontier / Niche
Souder D.; Zaheer A.; Sapienza H.; Ranucci R.	How family influence, socioemotional wealth, and competitive conditions shape new technology adoption	2017	Strategic Management Journal	62	10.1002/smj.2614	https://www.scopus.com/inward/record.uri?eid=2-s2.0-85006977420&doi=10.1002%2fsmj.2614&partnerID=40&md5=9f8be9e6974b6a8d2c6aaa0b24ae2501	Research summary: In family businesses, investment decisions often involve both socioemotional wealth and economic considerations. Focusing on new technology adoption, we argue that multiple dimensions of socioemotional wealth contribute to complex effects within different types of family firms—depending on the level of family control—as well as in contrast to non-family firms. Results based on c…	family firms; investment policy; socioemotional wealth; technology adoption; threat of competition	Behavioral research; Decision making; Investments; Competitive threats; Economic considerations; Family firms; Investment decisions; Investment policies; Multiple dimensions; Socioemotional wealth; Technology adoption; Competition	Berrone P., Cruz C., Gomez-Mejia L.R., Socioemotional wealth in family firms: theoretical dimensions, assessment approaches, and agenda for future research, Family Business Review, 25, 3, pp. 258-279, (2012); Chrisman J.J., Patel P.C., Variations in R&D investments of family and non-family firms: behavioral agency and myopic loss aversion perspectives, Academy of Management Journal, 55, pp. 976-9…		John Wiley and Sons Ltd	7.2	Theme 2: china, investments, electric vehicle, electric vehicles	china, investments, electric vehicle, electric vehicles	Q1	2	462	0.2421	0.3314	47.0952	0.1576	0	0.5	0.4028	0.1343	6.843	0.9185	0.0957	0.3025	0.0068	0.0356	Q4: Emerging / Structural	Q4: Frontier / Niche
Bohnsack R.; Pinkse J.	Value Propositions for Disruptive Technologies: Reconfiguration Tactics in the Case of Electric Vehicles	2017	California Management Review	56	10.1177/0008125617717711	https://www.scopus.com/inward/record.uri?eid=2-s2.0-85041061539&doi=10.1177%2f0008125617717711&partnerID=40&md5=70f055ba735894907e46c37ad21bbbc1	Disruptive technologies tend to underperform on attributes that are considered as key attributes of incumbent technologies and require new value propositions to increase mainstream customer appeal. Yet, how do firms reconfigure their value proposition as a way to overcome the technological inferiority of disruptive technologies? This article conceptualizes and empirically investigates the process…	business model; disruptive innovation; disruptive technology; electric vehicles; value proposition; value proposition innovation		Govindarajan V., Kopalle P.K., The Usefulness of Measuring Disruptiveness of Innovations Ex Post in Making Ex Ante Predictions, Journal of Product Innovation Management, 23, 1, pp. 12-18, (2006); Tellis G.J., Disruptive Technology or Visionary Leadership?, Journal of Product Innovation Management, 23, 1, pp. 34-38, (2006); Christensen C.M., The Innovator’s Dilemma: When New Technologies Cause Gre…		SAGE Publications Ltd	7.3	Theme 2: china, investments, electric vehicle, electric vehicles	china, investments, electric vehicle, electric vehicles	Q1	2	462	0.2421	0.3314	47.0952	0.1576	0	0.5	0.4028	0.1343	6.843	0.9185	0.0957	0.3025	0.0068	0.0356	Q4: Emerging / Structural	Q4: Frontier / Niche
Guenzi P.; Nijssen E.J.	Studying the antecedents and outcome of social media use by salespeople using a MOA framework	2020	Industrial Marketing Management	46	10.1016/j.indmarman.2020.08.005	https://www.scopus.com/inward/record.uri?eid=2-s2.0-85089379601&doi=10.1016%2fj.indmarman.2020.08.005&partnerID=40&md5=84805ff5ac2c0e48d47847816743d88c	The innovative impact of digital technologies on sales forces is largely unexplored. Particularly, the understanding of drivers of social media use by salespeople remains fragmented and scant. Drawing on motivation-opportunity-ability theory, this study develops an integrative framework. The individual's opportunities to use social media, including perceptions about market readiness, peer influen…	MOA framework; Sales; Social media		Agnihotri R., Rapp A., Trainor K., Understanding the role of information communication in the buyer-seller exchange process: antecedents and outcomes, Journal of Business & Industrial Marketing, 24, 7, pp. 474-486, (2009); Agnihotri R., Dingus R., Hu M.Y., Krush M.T., Social media: Influencing customer satisfaction in B2B sales, Industrial Marketing Management, 53, February, pp. 172-180, (2016); …		Elsevier Inc.	7.5	Theme 8: social media, social networking (online), knowledge, psychology	social media, social networking (online), knowledge, psychology	Q1	8	112	0.5845	0.1818	113.589	0.7384	0	0.5	0.2083	0.0694	5.2199	0.3385	0.096	0.3056	0.0183	0.4931	Q1: Core / Established	Q2: Mature / Potential
Gao T.T.; Leichter G.; Wei Y.S.	Countervailing effects of value and risk perceptions in manufacturers' adoption of expensive, discontinuous innovations	2012	Industrial Marketing Management	51	10.1016/j.indmarman.2011.09.014	https://www.scopus.com/inward/record.uri?eid=2-s2.0-84862666347&doi=10.1016%2fj.indmarman.2011.09.014&partnerID=40&md5=5373e11549d60728ddbc3185936cb45b	Both value and risk perceptions are germane to industrial firms' adoption decisions involving discontinuous innovations. Yet a surprisingly limited number of studies examine how these two considerations jointly influence the innovation adoption phenomenon. We intend to fill this gap by studying the countervailing and context-dependent effects of value and risk perceptions on industrial firms' int…	Discontinuous technologies; Industrial marketing; Innovation adoption; Perceived risk; Perceived value		Agarwal R., Prasad J., A conceptual and operational definition of personal innovativeness in the domain of information technology, Information Systems Research, 9, 2, pp. 204-215, (1998); Agarwal S., Teas R.K., Perceived value: Mediating role of perceived risk, Journal of Marketing Theory and Practice, 9, 4, pp. 1-14, (2001); Anderson J.C., Relationship in business markets: Exchange episodes, val…			7.5	Theme 8: social media, social networking (online), knowledge, psychology	social media, social networking (online), knowledge, psychology	Q1	8	112	0.5845	0.1818	113.589	0.7384	0	0.5	0.2083	0.0694	5.2199	0.3385	0.096	0.3056	0.0183	0.4931	Q1: Core / Established	Q2: Mature / Potential
Siamagka N.-T.; Christodoulides G.; Michaelidou N.; Valvi A.	Determinants of social media adoption by B2B organizations	2015	Industrial Marketing Management	233	10.1016/j.indmarman.2015.05.005	https://www.scopus.com/inward/record.uri?eid=2-s2.0-84929629407&doi=10.1016%2fj.indmarman.2015.05.005&partnerID=40&md5=855c33215e04cf99cca1c9635211e33d	This study contributes to the current dearth of knowledge on the potential of social media as a marketing tool in industrial settings, by focusing on factors that determine social media adoption by B2B organizations. A conceptual model, which draws on the technology acceptance model and resource-based theory, is developed and tested using quantitative data from B2B organizations in the UK. Findin…	Adoption; B2B; Resource-based theory; Social media; Technology acceptance model		Adams D.A., Nelson R.R., Todd P.A., Perceived usefulness, ease of use, and usage of information technology: a replication, MIS Quarterly, 16, 2, pp. 227-247, (1992); Agarwal R., Prasad J., A conceptual and operational definition of personal innovativeness in the domain of information technology, Information Systems Research, 9, 2, pp. 204-215, (1998); Agarwal R., Prasad J., The antecedents and co…		Elsevier Inc.	7.5	Theme 8: social media, social networking (online), knowledge, psychology	social media, social networking (online), knowledge, psychology	Q1	8	112	0.5845	0.1818	113.589	0.7384	0	0.5	0.2083	0.0694	5.2199	0.3385	0.096	0.3056	0.0183	0.4931	Q1: Core / Established	Q2: Mature / Potential
Magnaye R.; Sauser B.; Patanakul P.; Nowicki D.; Randall W.	Earned readiness management for scheduling, monitoring and evaluating the development of complex product systems	2014	International Journal of Project Management	23	10.1016/j.ijproman.2014.01.009	https://www.scopus.com/inward/record.uri?eid=2-s2.0-84905263167&doi=10.1016%2fj.ijproman.2014.01.009&partnerID=40&md5=3402d450961dc7f3afd03eb91ed402b3	How should the development of a complex product system (CPS) be managed in a manner that focuses on process milestones, which is responsive to changes in technology and requirements; based on maturity measures; and applied in an interactive manner, in addition to facilitating timely feedback? This is considered to be an important question in project management. Project management tools and techni…	Control; Earned readiness management; Integration readiness level; IRL; Monitoring; Scheduling; SRL; System readiness level; Technology readiness level; TRL	Control; Innovation; Monitoring; Project management; Integration readiness; IRL; Readiness levels; SRL; Technology readiness levels; TRL; adaptive management; monitoring; production system; project management; technological development; Scheduling	Abba W.F., Earned value management - reconciling government and commercial practices, Program Manager, 26, pp. 58-63, (1997); Abba W.F., How Earned Value Got To Prime Time: A Short Look Back and Glance Ahead, (2001); Abernethey T., An Application of the Rayleigh Distribution to Contract Cost Data, (1984); Andersen E.S., Warning: activity planning is hazardous to your project's health!, Int. J. Pr…		Elsevier Ltd	7.5	Theme 2: china, investments, electric vehicle, electric vehicles	china, investments, electric vehicle, electric vehicles	Q1	2	462	0.2421	0.3314	47.0952	0.1576	0	0.5	0.4028	0.1343	6.843	0.9185	0.0957	0.3025	0.0068	0.0356	Q4: Emerging / Structural	Q4: Frontier / Niche
Xu X.; Liu J.	Artificial intelligence humor in service recovery	2022	Annals of Tourism Research	20	10.1016/j.annals.2022.103439	https://www.scopus.com/inward/record.uri?eid=2-s2.0-85133413081&doi=10.1016%2fj.annals.2022.103439&partnerID=40&md5=72002661f32c47d3264c4e7ba7ded716	With the growing prevalence of artificial intelligence (AI) technologies in the tourism and hospitality industry, the phenomenon of AI service failure emerges, which merits empirical attention. Via six scenario-based experiments, this study verifies why and how humorous responses from AI agents affect customers' tolerance of AI service failure. Findings confirm the positive impact of humorous res…	Artificial intelligence; Customer tolerance.; Humorous response; Service failure and recovery	artificial intelligence; hospitality industry; research work; service provision; service quality; technology adoption; tourism economics; tourism management	Aragon S.R., Creating social presence in online environments, New Directions for Adult and Continuing Education, 100, pp. 57-68, (2003); Ashfaq M., Yun J., Yu S., Loureiro S.M.C., I, Chatbot: Modeling the determinants of users’ satisfaction and continuance intention of AI-powered service agents, Telematics and Informatics, 54, (2020); Beal M., Gregoire Y., How do observers react to companies’ hum…		Elsevier Ltd	7.8	Theme 9: virtual reality, tourism, travel behavior, tourist destination	virtual reality, tourism, travel behavior, tourist destination	Q1	9	131	0.615	0.2999	73.1527	0.3852	0	0.5	0.4167	0.1389	4.9732	0.2504	0.1577	1	0.0208	0.5899	Q1: Core / Established	Q1: Emerging / Growth
Zach F.J.; Nicolau J.L.; Sharma A.	Disruptive innovation, innovation adoption and incumbent market value: The case of Airbnb	2020	Annals of Tourism Research	52	10.1016/j.annals.2019.102818	https://www.scopus.com/inward/record.uri?eid=2-s2.0-85074164247&doi=10.1016%2fj.annals.2019.102818&partnerID=40&md5=87287b0823180432e86188db09483d1c	The purpose of this article is to analyze the market value impact of actions taken in response to disruptive innovation; specifically, actions that incumbent lodging firms implement to adopt the innovation of peer-to-peer trading-based accommodation rental. As incumbent firms need to device strategies to accommodate the disruption stemming from a new entrant with a disruptive business model, we a…	Disruptive innovation; Event study; Incumbent response; Innovation adoption; Market value; Peer-to-peer lodging	hospitality industry; innovation; market conditions; technology adoption; tourism market	Abernathy W.J., Clark K.B., Innovation: Mapping the winds of creative destruction, Research Policy, 14, 1, pp. 3-22, (1985); Aghion P., Blundell R., Griffith R., Howitt P., Prantl S., The effects of entry on incumbent innovation and productivity, The Review of Economics and Statistics, 91, 1, pp. 20-32, (2009); Ahuja G., Lampert C.M., Entrepreneurship in the large corporation: A longitudinal stud…		Elsevier Ltd	7.8	Theme 9: virtual reality, tourism, travel behavior, tourist destination	virtual reality, tourism, travel behavior, tourist destination	Q1	9	131	0.615	0.2999	73.1527	0.3852	0	0.5	0.4167	0.1389	4.9732	0.2504	0.1577	1	0.0208	0.5899	Q1: Core / Established	Q1: Emerging / Growth
Aebli A.	Tourists' motives for gamified technology use	2019	Annals of Tourism Research	23	10.1016/j.annals.2019.102753	https://www.scopus.com/inward/record.uri?eid=2-s2.0-85069627694&doi=10.1016%2fj.annals.2019.102753&partnerID=40&md5=d2e1c6cf840834bbbf024b630fa169ac	Game-related technologies have been discussed as a promising means for tourists' co-creation of meaningful experiences. However, little is known about tourists' underlying motivations for using gamified technologies. This study explores tourists' motives for engaging with gamified technology during a pleasure vacation. By employing a qualitative laddering technique based on the rationale of the m…	Desired end values; Gamified technology; Means-end chain laddering; Tourist experience; Usage motives	mobile phone; software; technology adoption; tourist behavior; tourist destination	Atkinson J.W., Feather N.T., A theory of achievement motivation, (1966); Bogost I., Persuasive games: The expressive power of videogames, (2007); Brey P., Design for the value of human well-being, Handbook of ethics, values, and technological design. Sources, theory, values and application domains, pp. 365-382, (2015); Bulencea P., Egger R., Gamification in tourism: Designing memorable experience…		Elsevier Ltd	7.8	Theme 9: virtual reality, tourism, travel behavior, tourist destination	virtual reality, tourism, travel behavior, tourist destination	Q1	9	131	0.615	0.2999	73.1527	0.3852	0	0.5	0.4167	0.1389	4.9732	0.2504	0.1577	1	0.0208	0.5899	Q1: Core / Established	Q1: Emerging / Growth
Yu L.; Zhao P.; Tang J.; Pang L.	Changes in tourist mobility after COVID-19 outbreaks	2023	Annals of Tourism Research	15	10.1016/j.annals.2022.103522	https://www.scopus.com/inward/record.uri?eid=2-s2.0-85143717725&doi=10.1016%2fj.annals.2022.103522&partnerID=40&md5=1a7fd0c3947e7401e38ba079b3ce4c42	We comparatively examined tourist mobility changes in the entire country and explicitly covered two distinct waves of COVID-19 outbreaks, based on mobile phone data from 277.15 million tourists from 2019 to 2021 in China. The results show that domestic tourism in Beijing was even higher after the pandemic than prior to it. In addition, we found that female and elderly groups had a slower recovery…	Big data; China; Human travel behavior; The COVID-19 pandemic; Tourist mobility	Beijing [China]; China; COVID-19; mobile phone; mobility; tourism management; tourist behavior; travel behavior	Alarcon D.M., Cole S., No sustainability for tourism without gender equality, Journal of Sustainable Tourism, 27, 7, pp. 903-919, (2019); Aleta A., Martin-Corral D., Pastore y Piontti A., Ajelli M., Litvinova M., Chinazzi M., Moreno Y., Modelling the impact of testing, contact tracing and household quarantine on second waves of COVID-19, Nature Human Behaviour, 4, 9, pp. 964-971, (2020); Arbulu I…		Elsevier Ltd	7.8	Theme 9: virtual reality, tourism, travel behavior, tourist destination	virtual reality, tourism, travel behavior, tourist destination	Q1	9	131	0.615	0.2999	73.1527	0.3852	0	0.5	0.4167	0.1389	4.9732	0.2504	0.1577	1	0.0208	0.5899	Q1: Core / Established	Q1: Emerging / Growth
Cabiddu F.; Lui T.-W.; Piccoli G.	Managing Value Co-Creation In The Tourism Industry	2013	Annals of Tourism Research	231	10.1016/j.annals.2013.01.001	https://www.scopus.com/inward/record.uri?eid=2-s2.0-84874525013&doi=10.1016%2fj.annals.2013.01.001&partnerID=40&md5=f24caf8d724ce9fc7375efcab71b02ed	The continuing development and widespread adoption of information technology (IT) has deeply influenced the tourism industry. Despite recent attention, we lack a clear understanding of the process by which partners co-create and share IT-enabled value. Grounded in Service-Dominant logic (S-D logic), this study examines how IT enables value co-creation in tourism and why some players appear to app…	Information technology; Multiple case; Service-Dominant logic; Theory building; Value appropriation; Value co-creation	information technology; technological development; technology adoption; tourism management	Achrol R., Kotler P., The service-dominant logic for marketing: A critique, The service-dominant logic of marketing: Dialog, debate, and directions, pp. 320-337, (2006); Ansari S.M., Fiss P.C., Zajac E.J., Made to fit: How practices vary as they diffuse, Academy of Management Journal, 35, pp. 67-92, (2010); Applegate L.M., Piccoli G., Brohman K., TripIt: The traveler's agent, (2008); Baloglu S., …			7.8	Theme 9: virtual reality, tourism, travel behavior, tourist destination	virtual reality, tourism, travel behavior, tourist destination	Q1	9	131	0.615	0.2999	73.1527	0.3852	0	0.5	0.4167	0.1389	4.9732	0.2504	0.1577	1	0.0208	0.5899	Q1: Core / Established	Q1: Emerging / Growth
Wu Y.-F.; Hannam K.; Xu H.-G.	Reconceptualising home in seasonal Chinese tourism mobilities	2018	Annals of Tourism Research	32	10.1016/j.annals.2018.09.005	https://www.scopus.com/inward/record.uri?eid=2-s2.0-85053766779&doi=10.1016%2fj.annals.2018.09.005&partnerID=40&md5=f5801776a653f5f80aab1290fce110a3	This article has sought to contribute to the study of home in tourism studies by conceptualising how Chinese seasonal tourists to Sanya make sense of their own practices of home in doing health-related tourism mobilities. Qualitative research was conducted with 43 retired ‘snowbirds’ over three years in Sanya. It is found that the interplay of both mobile and located homes and identities has dest…	Home; Reconceptualisation; Retirement; Sanya; Tourism mobilities	China; Hainan; Sanya; mobility; retirement; seasonality; sense of place; tourism	Abdallah A., Fletcher T., Hannam K., Lebanese food, ‘Lebaneseness’ and the Lebanese Diaspora in London, Hospitality and Society, (2018); Ahmed S., Home and away: Narratives of migration and estrangement, International Journal of Cultural Studies, 2, 3, pp. 329-347, (1999); Ahmed S., Castaneda C., Fortier A.M., Sheller M., Uprootings/regroupings: Questions of home and migration, (2003); Bian Y.J.,…		Elsevier Ltd	7.8	Theme 2: china, investments, electric vehicle, electric vehicles	china, investments, electric vehicle, electric vehicles	Q1	2	462	0.2421	0.3314	47.0952	0.1576	0	0.5	0.4028	0.1343	6.843	0.9185	0.0957	0.3025	0.0068	0.0356	Q4: Emerging / Structural	Q4: Frontier / Niche
Hong C.; Choi E.-K.C.; Joung H.-W.D.	Determinants of customer purchase intention toward online food delivery services: The moderating role of usage frequency	2023	Journal of Hospitality and Tourism Management	12	10.1016/j.jhtm.2022.12.005	https://www.scopus.com/inward/record.uri?eid=2-s2.0-85143728159&doi=10.1016%2fj.jhtm.2022.12.005&partnerID=40&md5=b9c9a8cd98c82a4c3ccb1e1af4c22b2e	In this study, the determinants (i.e., social influence, effort expectancy, performance expectancy, trust, and food safety risk perception) affecting customers' purchase intention toward online food delivery services are explored based on the unified theory of acceptance and use of technology. The moderating effect of usage frequency between determinants and purchase intention is also examined to…	Food safety risk perception; Online food delivery service; Purchase intention; Trust in online food delivery service; Usage frequency		Ajzen I., Czasch C., Flood M.G., From intentions to behavior: Implementation intention, commitment, and conscientiousness 1, Journal of Applied Social Psychology, 39, 6, pp. 1356-1372, (2009); Al Amin M., Arefin M.S., Alam M.R., Ahammad T., Hoque M.R., Using mobile food delivery applications during COVID-19 pandemic: An extended model of planned behavior, Journal of Food Products Marketing, 27, 2…		Elsevier Ltd	7.8	Theme 8: social media, social networking (online), knowledge, psychology	social media, social networking (online), knowledge, psychology	Q1	8	112	0.5845	0.1818	113.589	0.7384	0	0.5	0.2083	0.0694	5.2199	0.3385	0.096	0.3056	0.0183	0.4931	Q1: Core / Established	Q2: Mature / Potential
Bhatiasevi V.; Yoopetch C.	The determinants of intention to use electronic booking among young users in Thailand	2015	Journal of Hospitality and Tourism Management	57	10.1016/j.jhtm.2014.12.004	https://www.scopus.com/inward/record.uri?eid=2-s2.0-84922703747&doi=10.1016%2fj.jhtm.2014.12.004&partnerID=40&md5=f8f85a04458326ef2391823104c7c3f1	Tourism is one of the largest and fastest growing industries worldwide. It helps to support the economic growth and development of many countries, Thailand included. A key engine of the growth of tourism has been the Internet, especially over recent years. One of the objectives of the Second ICT Master Plan in Thailand is to promote the use of ICT, namely the Internet, e-commerce, online marketin…	E-booking; Intention to use; Technology acceptance; Thailand; Tourism		Almeida N.M., Silva J.A., Mendes J., Oom Do Valle P., The effects of marketing communication on the tourist's hotel reservation process, Anatolia: An International Journal of Tourism & Hospitality Research, 23, 2, pp. 234-250, (2012); Alsheikh L., Bojei J., Customer's perceived value to use mobile banking services, International Conference on Management, Behavioral Sciences and Economics Issues (…		Elsevier Ltd	7.8	Theme 9: virtual reality, tourism, travel behavior, tourist destination	virtual reality, tourism, travel behavior, tourist destination	Q1	9	131	0.615	0.2999	73.1527	0.3852	0	0.5	0.4167	0.1389	4.9732	0.2504	0.1577	1	0.0208	0.5899	Q1: Core / Established	Q1: Emerging / Growth
Attie E.; Meyer-Waarden L.	How Do You Sleep? The Impact of Sleep Apps on Generation Z's Well-Being	2023	Journal of Interactive Marketing	3	10.1177/10949968221142806	https://www.scopus.com/inward/record.uri?eid=2-s2.0-85152692674&doi=10.1177%2f10949968221142806&partnerID=40&md5=0941a06756ae69c902e53c8628b3c562	Mobile health (mHealth) apps have fundamentally changed the usage of smartphones in people's daily lives. In this context, sleep apps, the most popular mHealth apps, can track and enhance user well-being. Understanding the antecedents of the usage of sleep apps is of timely research interest. This study focuses on whether and how sleep apps influence Generation Z users’ well-being (as this genera…	Internet of Things; mHealth; personality traits; privacy concerns; sleep app; well-being		Aboelmaged M., Hashem G., Mouakket S., Predicting Subjective Well-Being Among mHealth Users: A Readiness–Value Model, International Journal of Information Management, 56, (2021); Agarwal S., LeFevre A.E., Lee J., L'Engle K., Mehl G., Sinha C., Labrique A., Guidelines for Reporting of Health Interventions Using Mobile Phones: Mobile Health (mHealth) Evidence Reporting and Assessment (mERA) Checkli…		SAGE Publications Ltd	7.8	Theme 5: health care, mhealth, india, internet of things	health care, mhealth, india, internet of things	Q1	5	136	0.2703	0.3017	47.4706	0.1609	0	0.5	0.6316	0.2105	5.3761	0.3943	0.0957	0.3027	0.015	0.3605	Q3: Niche / Transient	Q4: Frontier / Niche
Al-Jabri I.M.; Sohail M.S.; Ndubisi N.O.	Understanding the usage of global social networking sites by Arabs through the lens of uses and gratifications theory	2015	Journal of Service Management	39	10.1108/JOSM-01-2015-0037	https://www.scopus.com/inward/record.uri?eid=2-s2.0-84938935046&doi=10.1108%2fJOSM-01-2015-0037&partnerID=40&md5=03cf7898ad328d5d3c48e7f4168f82e1	Purpose - The purpose of this paper is to increase understanding of the determinants and usage of global technology services in Saudi Arabia. The technology under investigation is social network technology, Twitter. Design/methodology/approach - Drawing upon relevant extant literature, the paper proposes a research model, which examines the relationship between personal and social factors and usa…	Enjoyment; Gender; Saudi Arabia; Self-presentation; Social interaction; Twitter usage		Agrifoglio R., Black S., Metallo C., Ferrara M., Extrinsic versus intrinsic motivation in continued twitter usage, Journal of Computer Information Systems, 53, 1, pp. 33-41, (2012); Al Omoush K.S., Yaseen S.G., Alma'aitah M.A., The impact of Arab cultural values on online social networking: the case of Facebook, Computers in Human Behavior, 28, 6, pp. 2387-2399, (2012); Al-Khalifa H., A first ste…		Emerald Group Holdings Ltd.	7.9	Theme 10: retailing, mobile phone, shopping activity, social influence	retailing, mobile phone, shopping activity, social influence	Q1	10	90	0.5901	0.2244	68.1556	0.3416	0	0.5	0.0526	0.0175	4.2725	0	0.1463	0.8713	0.0249	0.75	Q1: Core / Established	Q1: Emerging / Growth
Ko H.-T.; Lu H.-P.	Measuring innovation competencies for integrated services in the communications industry	2010	Journal of Service Management	48	10.1108/09564231011039277	https://www.scopus.com/inward/record.uri?eid=2-s2.0-77952205396&doi=10.1108%2f09564231011039277&partnerID=40&md5=fa8ef092fe9972a618f182ec18f083c9	Purpose: The purpose of this paper is to gain insight into firms' innovation competencies and to develop an instrument to examine the key innovation competencies that contribute to integrated services. Design/methodology/approach: Data were collected via the initial 80-item questionnaire given to innovation-related key figures within the Taiwanese communications industry (sample size 500; valid r…	Communication technologies; Competences; Innovation; Service industries; Taiwan		Abernathy W.J., Utterback J.M., Patterns of industrial innovation, Technology Review, 80, 7, pp. 40-47, (1978); Acs Z.J., Audretsch D.B., Innovation in large and small firms: An empirical analysis, The American Economic Review, 78, 4, pp. 678-690, (1988); Alegre-Vidal J., Lapiedra-Alcami R., Chiva-Gomez R., Linking operations strategy and product innovation: An empirical study of Spanish ceramic …			7.9	Theme 9: virtual reality, tourism, travel behavior, tourist destination	virtual reality, tourism, travel behavior, tourist destination	Q1	9	131	0.615	0.2999	73.1527	0.3852	0	0.5	0.4167	0.1389	4.9732	0.2504	0.1577	1	0.0208	0.5899	Q1: Core / Established	Q1: Emerging / Growth
Gerlach J.; Stock R.M.; Buxmann P.	Never forget where you're coming from: The role of existing products in adoptions of substituting technologies	2014	Journal of Product Innovation Management	12	10.1111/jpim.12197	https://www.scopus.com/inward/record.uri?eid=2-s2.0-84912524227&doi=10.1111%2fjpim.12197&partnerID=40&md5=20437187665abb9907604997bc6b79b6	The adoption of technological product innovations has received considerable attention among academics and practitioners alike, although the circumstances in which a new technology seeks to replace an existing product have remained largely overlooked. Research into the adoption of substituting technologies should incorporate this perspective, which provides insights into how technology adoption de…		Management; Adoption intention; Affective reactions; Product innovation; Technology adoption	Bagozzi R.P., The legacy of the technology acceptance model and a proposal for a paradigm shift, Journal of the Association for Information Systems, 8, 4, pp. 244-254, (2007); Bagozzi R.P., Yi Y., Phillips L.W., Assessing construct validity in organizational research, Administrative Science Quarterly, 36, 3, pp. 421-458, (1991); Bagozzi R.P., Gopinath M., Nyer P.U., The role of emotions in market…			8	Theme 5: health care, mhealth, india, internet of things	health care, mhealth, india, internet of things	Q1	5	136	0.2703	0.3017	47.4706	0.1609	0	0.5	0.6316	0.2105	5.3761	0.3943	0.0957	0.3027	0.015	0.3605	Q3: Niche / Transient	Q4: Frontier / Niche
Peng G.; Mu J.	Technology adoption in online social networks	2011	Journal of Product Innovation Management	27	10.1111/j.1540-5885.2011.00866.x	https://www.scopus.com/inward/record.uri?eid=2-s2.0-80054712027&doi=10.1111%2fj.1540-5885.2011.00866.x&partnerID=40&md5=997ae33db96ad568e869e1eb53a556b3	With the advances of information technology, online social networks are becoming increasingly important venues for technology adoption. However, although the dynamics of technology adoption in real world social networks have been well documented, technology adoption in online social networks remains relatively under-explored. This study identifies the differences between online and offline social…		Behavioral research; Decision making; Information technology; Innovation; Online systems; Open systems; Social networking (online); Social sciences computing; Adoption decision; Data sets; Governance structures; Innovativeness; Lock-in; Network structures; Offline; Online social networks; Open source software development; Panel data; Product innovation; Project leaders; Project team; Social netwo…	Aghion P., Tirole J., Formal and real authority in organizations, Journal of Political Economy, 105, 1, pp. 1-29, (1997); Arthur W.B., Competing technologies, increasing returns, and lock-in by historical small events, Economic Journal, 99, pp. 116-131, (1989); Bales K.F., A set of categories for the analysis of small group interaction, American Sociological Review, 15, pp. 257-263, (1950); Bar M…			8	Theme 8: social media, social networking (online), knowledge, psychology	social media, social networking (online), knowledge, psychology	Q1	8	112	0.5845	0.1818	113.589	0.7384	0	0.5	0.2083	0.0694	5.2199	0.3385	0.096	0.3056	0.0183	0.4931	Q1: Core / Established	Q2: Mature / Potential
Kuester S.; Homburg C.; Hess S.C.	Externally directed and internally directed market launch management: The role of organizational factors in influencing new product success	2012	Journal of Product Innovation Management	35	10.1111/j.1540-5885.2012.00968.x	https://www.scopus.com/inward/record.uri?eid=2-s2.0-84883750023&doi=10.1111%2fj.1540-5885.2012.00968.x&partnerID=40&md5=e89a5be650cf4f97d326a7bf1378f358	Introducing new products remains a critical challenge for managers. Consumer acceptance of new products is key to new product success and requires the effective implementation of market launch activities. The present study describes the relationship between different types of market launch activities and market-related, time-related, and financial market launch success. The study's framework exte…		Finance; Human resource management; Sales; Consumer acceptance; Critical challenges; Financial objectives; New product introductions; New product success; Organizational factors; Situational factors; Structural equation analysis; Commerce	Ambler T., Marketing: The trouble with finance, Business Strategy Review, 14, 3, pp. 54-62, (2003); Atuahene-Gima K., An exploratory analysis of the impact of market orientation on new product performance. A contingency approach, Journal of Product Innovation Management, 12, 4, pp. 275-293, (1995); Atuahene-Gima K., Adoption of new products by the sales force: The construct, research propositions…			8	Theme 2: china, investments, electric vehicle, electric vehicles	china, investments, electric vehicle, electric vehicles	Q1	2	462	0.2421	0.3314	47.0952	0.1576	0	0.5	0.4028	0.1343	6.843	0.9185	0.0957	0.3025	0.0068	0.0356	Q4: Emerging / Structural	Q4: Frontier / Niche
Song M.; Parry M.E.; Kawakami T.	Incorporating network externalities into the technology acceptance model	2009	Journal of Product Innovation Management	76	10.1111/j.1540-5885.2009.00659.x	https://www.scopus.com/inward/record.uri?eid=2-s2.0-63449123191&doi=10.1111%2fj.1540-5885.2009.00659.x&partnerID=40&md5=0af48ddc88704184f811303b65b7836e	Research on network externalities has identified a number of product categories in which the market performance of an innovation (e.g., unit sales and revenues) is an increasing function of that innovation's installed base and the availability of complementary products. Innovation scholars have attributed these findings to the positive impact of network externality variables on consumer perceptio…		Exposure controls; Innovation; Life cycle; Multi agent systems; Purchasing; Sales; Adoption decisions; Adoption models; Complementary products; Conceptual models; Consumer awareness; Consumer perceptions; Consumer purchase; Digital musics; Ease of use; Empirical analysis; Empirical examinations; Increasing functions; Innovation attributes; Management of innovations; Market performance; Network ex…	Adams D.A., Nelson R.R., Todd P.A., Perceived Usefulness, Ease of Use, and Usage of Information Technology: A Replication, MIS Quarterly, 16, 2, pp. 227-247, (1992); Arndt J., Role of Product-Related Conversations in the Diffusion of a New Product, Journal of Marketing Research, 4, 3, pp. 291-295, (1967); Baron R.M., Kenny D.A., The Moderator-Mediator Variable Distinction in Social Psychological …			8	Theme 2: china, investments, electric vehicle, electric vehicles	china, investments, electric vehicle, electric vehicles	Q1	2	462	0.2421	0.3314	47.0952	0.1576	0	0.5	0.4028	0.1343	6.843	0.9185	0.0957	0.3025	0.0068	0.0356	Q4: Emerging / Structural	Q4: Frontier / Niche
Goldfarb A.; Taska B.; Teodoridis F.	Could machine learning be a general purpose technology? A comparison of emerging technologies using data from online job postings	2023	Research Policy	12	10.1016/j.respol.2022.104653	https://www.scopus.com/inward/record.uri?eid=2-s2.0-85140139828&doi=10.1016%2fj.respol.2022.104653&partnerID=40&md5=5613f0095127629ec760328f3d245055	Many emerging technologies have aspects of General Purpose Technologies (GPTs). However, true GPTs are rare and hold potential for large-scale economic impact. Thus, it is important for policymakers and managers to assess which emerging technologies are likely GPTs. We describe an approach that uses data from online job ads to rank emerging technologies on their GPT likelihood. The approach sugge…	Artificial intelligence; Enabling technologies; General purpose technologies; Machine learning; Technology adoption; Technology innovation	E-learning; Economic and social effects; Engineering education; Patents and inventions; Economic impacts; Emerging technologies; Enabling technologies; General purpose technologies; Job postings; Large-scales; Machine-learning; Scale economics; Technology adoption; Technology innovation; Machine learning	Allen R.C., Collective invention, J. Econ. Behav. Organ., 4, 1, pp. 1-24, (1983); Attewell P., Technology diffusion and organizational learning: the case of business computing, Organ. Sci., 3, pp. 1-19, (1992); Austin D., Macauley M., Cutting through environmental issues: technology as a doubled-edged sword, Brookings Rev., 19, 1, pp. 24-27, (2001); Beraja M., Kao A., Yang D., Yuchtman N., AI-toc…		Elsevier B.V.	8	Theme 2: china, investments, electric vehicle, electric vehicles	china, investments, electric vehicle, electric vehicles	Q1	2	462	0.2421	0.3314	47.0952	0.1576	0	0.5	0.4028	0.1343	6.843	0.9185	0.0957	0.3025	0.0068	0.0356	Q4: Emerging / Structural	Q4: Frontier / Niche
Steffen B.; Karplus V.; Schmidt T.S.	State ownership and technology adoption: The case of electric utilities and renewable energy	2022	Research Policy	9	10.1016/j.respol.2022.104534	https://www.scopus.com/inward/record.uri?eid=2-s2.0-85129046197&doi=10.1016%2fj.respol.2022.104534&partnerID=40&md5=a870da2a84945b796b0f109a7afb0c8e	Technology adoption is crucial to address pressing public policy issues such as climate change, but the role of ownership structure in adoption decisions is not well understood. The low-carbon energy transition in the electricity industry is a case in point. Following market liberalization, the electricity industry in many countries is now characterized by a co-existence of state-owned and privat…	adoption; energy transition; ownership; privatization; state-owned enterprise	Climate change; Electric industry; Electric utilities; Energy policy; Investments; Regression analysis; Adoption; Electricity industry; Energy transitions; European union; Ownership; Pressung; Renewable energies; State owned enterprise; State ownership; Technology adoption; Privatization	Albrecht J., Arts B., Climate policy convergence in Europe: an assessment based on National Communications to the UNFCCC, J. Eur. Public Policy, 12, pp. 885-902, (2005); Alova G., A global analysis of the progress and failure of electric utilities to adapt their portfolios of power-generation assets to the energy transition, Nat. Energy., (2020); Bade G., Power to the people: Bernie calls for fed…		Elsevier B.V.	8	Theme 2: china, investments, electric vehicle, electric vehicles	china, investments, electric vehicle, electric vehicles	Q1	2	462	0.2421	0.3314	47.0952	0.1576	0	0.5	0.4028	0.1343	6.843	0.9185	0.0957	0.3025	0.0068	0.0356	Q4: Emerging / Structural	Q4: Frontier / Niche
Burlinson A.; Giulietti M.; Battisti G.	Technology adoption, consumer inattention and heuristic decision-making: Evidence from a UK district heating scheme	2018	Research Policy	10	10.1016/j.respol.2018.06.017	https://www.scopus.com/inward/record.uri?eid=2-s2.0-85050695359&doi=10.1016%2fj.respol.2018.06.017&partnerID=40&md5=2be925528adccff0b8a02be60b73d244	This paper contributes to the debate on the energy efficiency paradox according to which consumers fail to adopt cost-effective, energy efficient technologies over less efficient technologies and therefore fail to reduce energy consumption. Both traditional and behavioural theories are used to investigate the decision-making process of residential consumers with empirical evidence based upon a sp…	Consumers; District heating; Energy efficiency; Heuristics; Inattention; Technology adoption	Behavioral research; Cost effectiveness; Decision making; District heating; Energy utilization; Heating equipment; Consumers; District heating system; Energy efficient technology; Heuristic decision makings; Heuristics; Inattention; Reduce energy consumption; Technology adoption; Energy efficiency	AECOM, Reducing the Capital Cost of District Heating Network Infrastructure: Routes to Implement Innovative Solutions, (2017); Alexander C.S., Becker H.J., The use of vignettes in survey research, Public Opin. Q., 42, 1, pp. 93-104, (1978); Allcott H., Consumers’ perceptions and misperceptions of energy costs, Am. Econ. Rev., Papers Proc., 101, 3, pp. 98-104, (2011); Ameli N., Brandt N., Determin…		Elsevier B.V.	8	Theme 2: china, investments, electric vehicle, electric vehicles	china, investments, electric vehicle, electric vehicles	Q1	2	462	0.2421	0.3314	47.0952	0.1576	0	0.5	0.4028	0.1343	6.843	0.9185	0.0957	0.3025	0.0068	0.0356	Q4: Emerging / Structural	Q4: Frontier / Niche
Lei L.; Yu D.; Zhou Y.	Better educated children, better Internet-connected elderly parents	2023	Research Policy	3	10.1016/j.respol.2023.104743	https://www.scopus.com/inward/record.uri?eid=2-s2.0-85147197441&doi=10.1016%2fj.respol.2023.104743&partnerID=40&md5=9810f957d3b871aac8047936cc3cd114	Despite its potential benefits, Internet adoption among older adults has long lagged behind that of younger age groups. This paper examines how adult children's education affects elderly parents’ Internet use. We exploit the arguably exogenous variation in children's years of schooling induced by the enforcement of the compulsory education law around 1986 in China. Using a sample of rural older a…	Children; Education; Internet use; Older adults; Rural China; Technology adoption	Age groups; Child; Child educations; Elderly parent; Internet adoption; Internet use; Older adults; Potential benefits; Rural chinas; Technology adoption	Ambade M., Joe W., Subramanian S., Children's education and level of health care utilization among parents: A pooled cross-sectional study from national population-based survey in India, GeroScience, 43, 5, pp. 2497-2514, (2021); Baller S., Dutta S., Lanvin B., The Global Information Technology Report 2016 Innovating in the Digital Economy, (2016); Baum C.F., Schaffer M.E., Stillman S., Enhanced …		Elsevier B.V.	8	Theme 6: engineering education, agriculture, agricultural technology, learning	engineering education, agriculture, agricultural technology, learning	Q1	6	40	0.5182	0.4089	29.05	0	0	0.5	0.25	0.0833	4.5398	0.0955	0.1522	0.9384	0.0312	1	Q1: Core / Established	Q1: Emerging / Growth
Wee S.; Coffman M.; La Croix S.	Do electric vehicle incentives matter? Evidence from the 50 U.S. states	2018	Research Policy	82	10.1016/j.respol.2018.05.003	https://www.scopus.com/inward/record.uri?eid=2-s2.0-85047873435&doi=10.1016%2fj.respol.2018.05.003&partnerID=40&md5=9bafd4ea6079783d7876f6a12227912a	We estimate the effectiveness of policy incentives for adoption of electric vehicles (EVs) in the 50 U.S. states. We employ a rich dataset of semi-annual state-level new EV vehicle registrations by make and model from 2010 to 2015 and state-level policy instruments that could affect new EV model registrations. We construct two measures of policy, one which aggregates policy instruments that can b…	Electric vehicles; State policy; Subsidies; Technology adoption	Aggregates; Electric Vehicles (EVs); Model Differences; Policy incentives; Policy instruments; State policy; Subsidies; Technology adoption; Vehicle registration; Electric vehicles	State Laws and Incentives, (2016); Alternative Fueling Station Locator, (2016); Vehicle Cost Calculator, (2017); Bento A., Kaffine D., Roth K., Zaragoza-Watkins M., The effects of regulation in the presence of multiple unpriced externalities: evidence from the transportation sector, Am. Econ. J.: Econ. Policy, 6, pp. 1-29, (2014); Beresteanu A., Li S., Gasoline prices, government support, and the…		Elsevier B.V.	8	Theme 2: china, investments, electric vehicle, electric vehicles	china, investments, electric vehicle, electric vehicles	Q1	2	462	0.2421	0.3314	47.0952	0.1576	0	0.5	0.4028	0.1343	6.843	0.9185	0.0957	0.3025	0.0068	0.0356	Q4: Emerging / Structural	Q4: Frontier / Niche
Kämpfen F.; Maurer J.	Does education help “old dogs” learn “new tricks”? The lasting impact of early-life education on technology use among older adults	2018	Research Policy	24	10.1016/j.respol.2018.03.017	https://www.scopus.com/inward/record.uri?eid=2-s2.0-85044529948&doi=10.1016%2fj.respol.2018.03.017&partnerID=40&md5=6cfabba2158b91eaacd14cf95703d342	Technological progress is often at the heart of improvements in quality of life. The development of personal computers (PCs) and the Internet are among the most important technological advances of the last century. PCs and the Internet have profoundly changed the way we access information, shop, view media, communicate, socialize, and spend our time. Despite the many benefits of computer and Inte…	Education; Instrumental variable; Internet; Personal computers; Technology adoption	Education; Engineering; Internet; Computer technology; Educational attainments; Instrumental variables; Model specifications; Occupational choice; Technological advances; Technological progress; Technology adoption; Personal computers	Agarwal R., Animesh A., Prasad K., Social Interactions and the “Digital Divide”: Explaining Variations in the Internet Use, (2009); Andersson G., Bergstrom J., Hollandare F., Carlbring P., Kaldo V., Ekselius L., Internet-based self-help for depression: randomised controlled trial, Br. J. Psychiatry, 187, (2005); Banks J., Mazzonna F., The effect of education on old age cognitive abilities: eviden…		Elsevier B.V.	8	Theme 6: engineering education, agriculture, agricultural technology, learning	engineering education, agriculture, agricultural technology, learning	Q1	6	40	0.5182	0.4089	29.05	0	0	0.5	0.25	0.0833	4.5398	0.0955	0.1522	0.9384	0.0312	1	Q1: Core / Established	Q1: Emerging / Growth
Magalhães M.; Afonso Ó.	A multi-sector growth model with technology diffusion and networks	2017	Research Policy	12	10.1016/j.respol.2017.05.004	https://www.scopus.com/inward/record.uri?eid=2-s2.0-85020991612&doi=10.1016%2fj.respol.2017.05.004&partnerID=40&md5=b4b19cf6674550f2af1a270be9f98be8	This paper adds the standard input–output linkages into a multi-sector endogenous growth model to study the interaction effects between linkages and technology adoption for aggregate productivity and for income per capita. We show that the greater the intensity with which a good is used as input by other sectors, the smaller are the technology adoption lags and the greater is the technology adopt…	Income differences; Production network; Technology diffusion	Economics; Productivity; Developed countries; Endogenous growth model; Income differences; Interaction effect; Production network; Technology adoption; Technology diffusion; Total factor productivity; Economic analysis	Acemoglu D., Why do new technologies complement skills? Directed technical change and wage inequality, Q. J. Econ., 113, 4, pp. 1055-1089, (1998); Acemoglu D., Directed technical change?, Rev. Econ. Stud., 69, 4, pp. 781-809, (2002); Acemoglu D., Antras P., Helpman E., Contracts and technology adoption?, Am. Econ. Rev., 97, 3, pp. 916-943, (2007); Acemoglu D., Carvalho V.M., Ozdaglar A., Salehi A…		Elsevier B.V.	8	Theme 2: china, investments, electric vehicle, electric vehicles	china, investments, electric vehicle, electric vehicles	Q1	2	462	0.2421	0.3314	47.0952	0.1576	0	0.5	0.4028	0.1343	6.843	0.9185	0.0957	0.3025	0.0068	0.0356	Q4: Emerging / Structural	Q4: Frontier / Niche
Hovav A.; Hemmert M.; Kim Y.J.	Determinants of internet standards adoption: The case of South Korea	2011	Research Policy	19	10.1016/j.respol.2010.09.016	https://www.scopus.com/inward/record.uri?eid=2-s2.0-79151482846&doi=10.1016%2fj.respol.2010.09.016&partnerID=40&md5=7353bf1159f6d41474293b12eb7df326	We develop an adoption model of infrastructure technologies and test it with survey data collected from companies in six industries in South Korea (hereafter: Korea). The implementation of a new Internet standard such as Internet Protocol version 6 (IPv6) depends on the usefulness of the technology to the adopting organizations and the environment in which they operate. The adoption of IPv6 in Ko…	Government policy; Internet standards; Korea; Normative pressure; Resource concentration; Technology adoption	Industry; Internet; Public policy; Standards; Technology; Government policy; Internet standards; Korea; Normative pressures; Resource concentration; Technology adoption; Internet protocols	Arthur W.B., Increasing returns and the new world of business, Harvard Business Review, 74, 4, pp. 101-109, (1996); Biggart N.W., Institutionalized patrimonialism in Korean business, The Economic Organization of East Asian Capitalism, pp. 215-236, (1997); Bradner S., The Internet Standards Process (RFC 2026), (1996); Cho Y.H., Yoon J., The origin and function of dynamic collectivism: An analysis …			8	Theme 2: china, investments, electric vehicle, electric vehicles	china, investments, electric vehicle, electric vehicles	Q1	2	462	0.2421	0.3314	47.0952	0.1576	0	0.5	0.4028	0.1343	6.843	0.9185	0.0957	0.3025	0.0068	0.0356	Q4: Emerging / Structural	Q4: Frontier / Niche
Weisenfeld U.; Hauerwaas A.; Elshiewy O.; Halder P.; Wesseler J.; Cingiz K.; Broer I.	Beyond plastic – Consumers prefer food packaging derived from genetically modified plants	2023	Research Policy	0	10.1016/j.respol.2023.104883	https://www.scopus.com/inward/record.uri?eid=2-s2.0-85170243635&doi=10.1016%2fj.respol.2023.104883&partnerID=40&md5=e306998d4276f5a4e6bf70fce32c6daa	The technology of genetically modified organisms (GMO) and especially genetically modified plants (GMP) applied in agriculture is a key element in a bioeconomy-based sustainability transition. However, consumers in many European countries allegedly disapprove of ‘green biotechnology’. Drawing on innovation adoption and risk perception literature, we explore the acceptance of GMP-based food packag…	Bioeconomy; Europe; Genetically modified plants; Innovation adoption; Plastic packaging; Risk perception	Fossil fuels; Packaging; Packaging machines; Packaging materials; Europe; European Countries; Food packaging; Genetically modified organisms; Green biotechnologies; Innovation adoption; Innovation risks; Key elements; Plastic packaging; Sustainability transition; Risk perception	Aerni P., Gagalac F., Scholderer J., The role of biotechnology in combating climate change: a question of politics?, Sci. Public Policy, 43, 1, pp. 13-28, (2016); Allenby G.M., Brazell J.D., Howell J.R., Rossi P.E., Economic valuation of product features, Quant. Mark. Econ., 12, 4, pp. 421-456, (2014); Andre Q., Chandon P., Haws K., Healthy through presence or absence, nature or science? A framew…		Elsevier B.V.	8	Theme 2: china, investments, electric vehicle, electric vehicles	china, investments, electric vehicle, electric vehicles	Q1	2	462	0.2421	0.3314	47.0952	0.1576	0	0.5	0.4028	0.1343	6.843	0.9185	0.0957	0.3025	0.0068	0.0356	Q4: Emerging / Structural	Q4: Frontier / Niche
Miller F.A.; French M.	Organizing the entrepreneurial hospital: Hybridizing the logics of healthcare and innovation	2016	Research Policy	38	10.1016/j.respol.2016.01.009	https://www.scopus.com/inward/record.uri?eid=2-s2.0-84955563296&doi=10.1016%2fj.respol.2016.01.009&partnerID=40&md5=9861d6737d1bfaf74fe686726bbd9db8	Contemporary research hospitals occupy a vexed position in the policy landscape. On the one hand, as healthcare providers, they must abide by the logic of healthcare policy, which expects health research to support improved health outcomes and high quality healthcare systems. On the other hand, as research facilities, they are beholden to the logic of innovation policy, which seeks to advance res…	Entrepreneurial hospital; Healthcare policy; Innovation studies; Research hospital; Research systems	Computer circuits; Health; Health care; Hospitals; Reconfigurable hardware; Technology transfer; Health benefits; Health care providers; Health outcomes; Innovation policies; Innovation studies; Research facilities; Research system; Science and Technology; Innovation	ACAHO-CHA, Moving Forward in Science, Technology, and Innovation Optimizing Opportunity & Execution in the Health & Life Sciences Sector. A response to the Science and Technology Consultation “Seizing Canada's Moment Moving Forward in Science, Technology and Innovation”, (2014); ACAHO, ACAHO Strongly Encourage by Federal Focus on Investment and Innovation to Support Health System Renewal, (2002);…		Elsevier B.V.	8	Theme 5: health care, mhealth, india, internet of things	health care, mhealth, india, internet of things	Q1	5	136	0.2703	0.3017	47.4706	0.1609	0	0.5	0.6316	0.2105	5.3761	0.3943	0.0957	0.3027	0.015	0.3605	Q3: Niche / Transient	Q4: Frontier / Niche
Cao D.; Sun Y.; Goh E.; Wang R.; Kuiavska K.	Adoption of smart voice assistants technology among Airbnb guests: A revised self-efficacy-based value adoption model (SVAM)	2022	International Journal of Hospitality Management	20	10.1016/j.ijhm.2021.103124	https://www.scopus.com/inward/record.uri?eid=2-s2.0-85121135276&doi=10.1016%2fj.ijhm.2021.103124&partnerID=40&md5=c741a18fa4b417d8aec2c595f43fac0c	Smart technology applications in hospitality can leverage user experience values only if they are motivated to adopt the provided technology. This study aimed to understand Airbnb guests’ intentions to adopt smart voice assistants (SVAs) like Amazon Alexa or Google Home. Underpinned by social cognitive theory (SCT), a revised self-efficacy-based value adoption model (SVAM) was developed for the s…	Airbnb; Perceived value; Privacy risk; Self-efficacy; Smart voice assistant; Technology adoption		(2018); (2019); Ammari T., Kaye J., Tsai J.Y., Bentley F., Music, search, and IoT: how people (really) use smart voice assistants, ACM Trans. Comput. -Hum. Interact., 26, 3, pp. 1-28, (2019); (2016); Balakrishnan A., (2016); Bandura A., Social Foundations of Thought and Action: A Social Cognitive Theory, (1986); Bandura A., Social cognitive theory: an agentic perspective, Asian J. Soc. Psychol., …		Elsevier Ltd	8.3	Theme 8: social media, social networking (online), knowledge, psychology	social media, social networking (online), knowledge, psychology	Q1	8	112	0.5845	0.1818	113.589	0.7384	0	0.5	0.2083	0.0694	5.2199	0.3385	0.096	0.3056	0.0183	0.4931	Q1: Core / Established	Q2: Mature / Potential
Okumus B.; Ali F.; Bilgihan A.; Ozturk A.B.	Psychological factors influencing customers’ acceptance of smartphone diet apps when ordering food at restaurants	2018	International Journal of Hospitality Management	196	10.1016/j.ijhm.2018.01.001	https://www.scopus.com/inward/record.uri?eid=2-s2.0-85040022075&doi=10.1016%2fj.ijhm.2018.01.001&partnerID=40&md5=1c0a7a97795d8c16930135ad7cb743a1	This paper examines the adoption of smartphone diet apps by restaurant customers and, more specifically, the psychological factors that influence their intention to use such apps when ordering food at restaurants. Data was collected from 395 individuals and analyzed using partial least squares structural equation modeling. Results showed that customers’ intention to use smartphone diet apps is pr…	Food ordering; Healthy eating; Personal innovativeness; Restaurant; Smartphone apps		Abushanab E., Pearson J.M., Internet banking in Jordan: the unified theory of acceptance and use of technology (UTAUT) perspective, J. Syst. Inf. Technol., 9, 1, pp. 78-97, (2007); Agarwal R., Prasad J., A conceptual and operational definition of personal innovativeness in the domain of information technology, Inf. Syst. Res., 9, 2, pp. 204-215, (1998); Ajzen I., The theory of planned behaviour, …		Elsevier Ltd	8.3	Theme 10: retailing, mobile phone, shopping activity, social influence	retailing, mobile phone, shopping activity, social influence	Q1	10	90	0.5901	0.2244	68.1556	0.3416	0	0.5	0.0526	0.0175	4.2725	0	0.1463	0.8713	0.0249	0.75	Q1: Core / Established	Q1: Emerging / Growth
Wang C.R.; Jeong M.	What makes you choose Airbnb again? An examination of users’ perceptions toward the website and their stay	2018	International Journal of Hospitality Management	140	10.1016/j.ijhm.2018.04.006	https://www.scopus.com/inward/record.uri?eid=2-s2.0-85047066026&doi=10.1016%2fj.ijhm.2018.04.006&partnerID=40&md5=81b7c227fa24f5ae6955e39805f16d67	Despite Airbnb's popularity as a sharing economy platform, few studies have simultaneously examined its customers’ attitudes toward its website and satisfaction with their Airbnb stay. Adopting the Technology Acceptance Model (TAM) and Innovation Diffusion Theory (IDT), this study attempts to examine Airbnb customers’ psychological behavior toward the entire Airbnb experience. Researchers conduct…	Airbnb; Airbnb website; Behavioral intentions; Innovation diffusion theory; Personal innovativeness; Sharing economy; Technology acceptance model		Adams D.A., Nelson R.R., Todd P.A., Perceived usefulness, ease of use, and usage of information technology: a replication, MIS Q., pp. 227-247, (1992); Agarwal R., Prasad J., A conceptual and operational definition of personal innovativeness in the domain of information technology, Inf. Syst. Res., 9, 2, pp. 204-215, (1998); (2016); Ajzen I., Fishbein M., Belief, Attitude, Intention and Behavior:…		Elsevier Ltd	8.3	Theme 10: retailing, mobile phone, shopping activity, social influence	retailing, mobile phone, shopping activity, social influence	Q1	10	90	0.5901	0.2244	68.1556	0.3416	0	0.5	0.0526	0.0175	4.2725	0	0.1463	0.8713	0.0249	0.75	Q1: Core / Established	Q1: Emerging / Growth
Lee W.; Xiong L.; Hu C.	The effect of Facebook users' arousal and valence on intention to go to the festival: Applying an extension of the technology acceptance model	2012	International Journal of Hospitality Management	233	10.1016/j.ijhm.2011.09.018	https://www.scopus.com/inward/record.uri?eid=2-s2.0-84858746676&doi=10.1016%2fj.ijhm.2011.09.018&partnerID=40&md5=36a621eb9ee0472c9a3a2ed66969aa85	The rapid development of social media has challenged event managers to rethink how this trend will shape traditional marketing practices. Given the rise of these technologies, the current breed of special event " fan" has started to take advantage of and venture into this social space for possible benefits. For event managers, the fundamental issue becomes how to uncover the process through which…	Emotion; Event management; Extend TAM (technology acceptance model); Facebook; Marketing communication; Social media		Ajzen I., The theory of planned behavior, Organizational Behavior and Human Decision Processes, 50, 2, pp. 179-211, (1991); Arbuckle J.L., Amos 16.0 User's Guide, (2007); Aylesworth A.B., MacKenzie S.B., Context is key: the effect of program-induced mood on thoughts about the ad, Journal of Advertising, 27, 2, pp. 17-31, (1998); Bagozzi R.P., Yi Y., On the evaluation of structural equation models…			8.3	Theme 8: social media, social networking (online), knowledge, psychology	social media, social networking (online), knowledge, psychology	Q1	8	112	0.5845	0.1818	113.589	0.7384	0	0.5	0.2083	0.0694	5.2199	0.3385	0.096	0.3056	0.0183	0.4931	Q1: Core / Established	Q2: Mature / Potential
Barac K.	Helping Disadvantaged Students: Findings from the Thuthuka Programme	2015	Accounting Education	12	10.1080/09639284.2015.1010171	https://www.scopus.com/inward/record.uri?eid=2-s2.0-84929272621&doi=10.1080%2f09639284.2015.1010171&partnerID=40&md5=4e0f8671dacd421f5b184a9cd75d1d3f	Drawing on social closure theory, this study achieved a deep understanding of the perceptions and experiences of the first cohort of candidates passing through the Thuthuka support programme. Using semi-structured interviews as part of a qualitative approach, currently prevalent modes of professional closure were considered by taking the backgrounds of these students into account, together with t…	accounting education; communication skills; higher-order skills; information technology skills; professional closure; social closure; Socio-economically disadvantaged students; South African chartered accountants; Thuthuka; transformation		Media, (2013); Akoojee S., Nkomo M., Twalo M., Access for labour market equity: Advancing the case for national development in South African higher education, Alternation, 19, 2, pp. 293-313, (2012); Andrade M.S., Bunker E.L., A model for self-regulated distance language learning, Distance Education, 30, 1, pp. 47-61, (2009); Angrist J., Lang D., Oreopoulos P., Incentives and services for college…		Routledge	2.8	Not Clustered (Low Keyword Overlap)		Q1	-1	0	0	0	0	0	0	0	0	0	0	0	0	0	0	0
Shirish A.; Srivastava S.C.; Panteli N.	Management and sustenance of digital transformations in the Irish microbusiness sector: examining the key role of microbusiness owner-manager	2023	European Journal of Information Systems	2	10.1080/0960085X.2023.2166431	https://www.scopus.com/inward/record.uri?eid=2-s2.0-85148357150&doi=10.1080%2f0960085X.2023.2166431&partnerID=40&md5=bec3576778d7fcbf7269bf1681930b05	Despite the economic and societal significance of microbusinesses (MBs), digital transformation (DT) efforts in the MB sector have been rather sporadic. Further, prior DT studies have primarily examined large- and mid-sized organisations, leaving a perceptible void in the literature. In this paper, we leverage the unique context of MBs and recognise the key role of microbusiness owner-managers (M…	digital inclusion policy; digital resilience; Digital transformation; digital transformation practices; learning; microbusiness; mindset; owner-manager; readiness	Digital inclusion; Digital inclusion policy; Digital resilience; Digital transformation; Digital transformation practice; Learning; Micro-business; Mindset; Owner/manager; Readiness; E-learning	Alibakhshi R., Srivastava S.C., Post-story: Influence of introducing story feature on social media posts, Journal of Management Information Systems, 39, 2, pp. 573-601, (2022); Armstrong C.P., Sambamurthy V., Information technology assimilation in firms: The influence of senior leadership and IT infrastructures, Information Systems Research, 10, 4, pp. 304-327, (1999); Bai W., Johanson M., Olivei…		Taylor and Francis Ltd.	8.6	Theme 6: engineering education, agriculture, agricultural technology, learning	engineering education, agriculture, agricultural technology, learning	Q1	6	40	0.5182	0.4089	29.05	0	0	0.5	0.25	0.0833	4.5398	0.0955	0.1522	0.9384	0.0312	1	Q1: Core / Established	Q1: Emerging / Growth
Wright R.T.; Roberts N.; Wilson D.	The role of context in IT assimilation: A multi-method study of a SaaS platform in the US nonprofit sector	2017	European Journal of Information Systems	22	10.1057/s41303-017-0053-2	https://www.scopus.com/inward/record.uri?eid=2-s2.0-85018678599&doi=10.1057%2fs41303-017-0053-2&partnerID=40&md5=3ba5fd25e83f03af142a272468644a16	Nonprofit organizations (NPOs) operate in environments characterized by growing competition for resources and greater stakeholder demands for accountability, which makes deploying and maintaining information systems a struggle. In this competitive, resource-constrained environment, enterprise Software-as-a-Service (SaaS) platforms offer NPOs a cost-effective way access reliable, low-maintenance i…	assimilation; cloud computing; enterprise SaaS platforms; enterprise systems; nonprofit; SaaS	Cloud computing; Cost effectiveness; Enterprise software; Nonprofit organization; assimilation; Enterprise system; nonprofit; SaaS; Saas platforms; Software as a service (SaaS)	Io A., Musah A., Small and medium enterprises (smes) in the cloud in developing countries: A synthesis of the literature and future research directions, Journal of Management and Sustainability, 5, 1, pp. 115-139, (2015); Agarwal R., Prasad J., A conceptual and operational definition of personal innovativeness in the domain of information technology, Information Systems Research, 9, 2, pp. 204-21…		Palgrave Macmillan Ltd.	8.6	Theme 2: china, investments, electric vehicle, electric vehicles	china, investments, electric vehicle, electric vehicles	Q1	2	462	0.2421	0.3314	47.0952	0.1576	0	0.5	0.4028	0.1343	6.843	0.9185	0.0957	0.3025	0.0068	0.0356	Q4: Emerging / Structural	Q4: Frontier / Niche
Zhu K.; Dong S.; Xu S.X.; Kraemer K.L.	Innovation diffusion in global contexts: Determinants of post-adoption digital transformation of European companies	2006	European Journal of Information Systems	490	10.1057/palgrave.ejis.3000650	https://www.scopus.com/inward/record.uri?eid=2-s2.0-33845945961&doi=10.1057%2fpalgrave.ejis.3000650&partnerID=40&md5=57f093a70f31c9bb0b10cf6f508ad3f1	Grounded in the diffusion of innovation theory and the technology- organization-environment framework, we develop an integrative model to study the determinants of post-adoption stages of innovation diffusion, using enterprise digital transformation as an example of technology-enabled innovations. We specify four innovation characteristics (relative advantage, compatibility, costs and security co…	Adoption contexts; Cross-country study; Europe; Innovation characteristics; Performance impact; Technology diffusion; Usage		BARUA A., KONANA P., WHINSTON A.B., YIN F., An empirical investigation of Net-enabled business value: An exploratory investigation, MIS Quarterly, 28, 4, pp. 585-620, (2004); BEATW R.C., SHIM J.P., JONES M.C., Factors influencing corporate Web site adoption: A time-based assessment, Information & Management, 38, 6, pp. 337-354, (2001); CARR N.G., IT doesn't matter, Harvard Business Review, 81, 5,…		Palgrave Macmillan Ltd.	8.6	Theme 2: china, investments, electric vehicle, electric vehicles	china, investments, electric vehicle, electric vehicles	Q1	2	462	0.2421	0.3314	47.0952	0.1576	0	0.5	0.4028	0.1343	6.843	0.9185	0.0957	0.3025	0.0068	0.0356	Q4: Emerging / Structural	Q4: Frontier / Niche
Zhu K.; Kraemer K.; Xu S.	Electronic business adoption by European firms: A cross-country assessment of the facilitators and inhibitors	2003	European Journal of Information Systems	737	10.1057/palgrave.ejis.3000475	https://www.scopus.com/inward/record.uri?eid=2-s2.0-1442352635&doi=10.1057%2fpalgrave.ejis.3000475&partnerID=40&md5=87fd6c735b63cdde3cdd8c769c4e5753	In this study, we developed a conceptual model for studying the adoption of electronic business (e-business or EB) at the firm level, incorporating six adoption facilitators and inhibitors, based on the technology-organizationenvironment theoretical framework. Survey data from 3100 businesses and 7500 consumers in eight European countries were used to test the proposed adoption model. We conducte…	Adoption; Electronic business; Empirical data; Europe; Firm scope; Readiness; Technology competence; Technology-organization-environment framework		Aiken M., Hage J., The organic organization and innovation, Sociology, 5, pp. 63-82, (1971); Anderson K.V., Bjorn-Anderson N., Globalization and ecommerce: Growth and impacts in Denmark. Working Paper, (2001); Eeurope Takes Off, (1999); Bailey J.P., Bakos Y., An exploratory study of the emerging role of electronic intermediaries, International Journal of Electronic Commerce, 1, 3, pp. 7-20, (1997…			8.6	Theme 2: china, investments, electric vehicle, electric vehicles	china, investments, electric vehicle, electric vehicles	Q1	2	462	0.2421	0.3314	47.0952	0.1576	0	0.5	0.4028	0.1343	6.843	0.9185	0.0957	0.3025	0.0068	0.0356	Q4: Emerging / Structural	Q4: Frontier / Niche
Lee C.-P.; Shim J.P.	An exploratory study of radio frequency identification (RFID) adoption in the healthcare industry	2007	European Journal of Information Systems	204	10.1057/palgrave.ejis.3000716	https://www.scopus.com/inward/record.uri?eid=2-s2.0-37249058273&doi=10.1057%2fpalgrave.ejis.3000716&partnerID=40&md5=b16b2ac01baf0b7550272ded1b75abbe	This study examines the radio frequency identification (RFID) adoption decision process and proposes a model predicting the likelihood of adopting RFID within organizations in the healthcare industry. A considerable number of studies have been conducted regarding organizational information technology (IT) adoption, but the nature of the organizational IT adoption process is still not well underst…	Healthcare; Need pull; Radio frequency identification; Technology push		ANDERSON J.C., NARUS J.A., Business Market Management: Understanding, Creating, and Delivering Value, (1999); BABBIE E., The Practice of Social Research, (2004); BAGOZZI R.P., YI Y., On the evaluation of structural equation models, Journal of the Academy of Marketing Science, 16, 1, pp. 74-94, (1988); BEATH C.M., Supporting the information technology champion, MIS Quarterly, 15, 3, pp. 355-371, (…		Palgrave Macmillan Ltd.	8.6	Theme 5: health care, mhealth, india, internet of things	health care, mhealth, india, internet of things	Q1	5	136	0.2703	0.3017	47.4706	0.1609	0	0.5	0.6316	0.2105	5.3761	0.3943	0.0957	0.3027	0.015	0.3605	Q3: Niche / Transient	Q4: Frontier / Niche
Nwankpa J.K.; Datta P.	Leapfrogging Healthcare Service Quality in Sub-Saharan Africa: The Utility-Trust Rationale of Mobile Payment Platforms	2022	European Journal of Information Systems	9	10.1080/0960085X.2021.1978339	https://www.scopus.com/inward/record.uri?eid=2-s2.0-85115286887&doi=10.1080%2f0960085X.2021.1978339&partnerID=40&md5=60c41f452f81170ace8a394b62c2f629	Can mobile payment platforms (MPPs) elevate Sub-Saharan Africa’s (SSA) healthcare service quality (HSQ)? In a region home to more than one billion people yet beset by a paucity of services and infrastructure, mobile devices and platforms are rapidly gaining ground. Rising healthcare needs and costs along with the fact that more than 60% of SSA lives in areas nearly 1.5 miles away from paved roads…	commitment; healthcare service quality; Irwin Brown, Kweku-Muata Osei-Bryson and Peter Meso; Mobile payment platform; sub-saharan africa; trust	Developing countries; Electronic money; Global system for mobile communications; Hospitals; mHealth; Commitment; Healthcare service quality; Healthcare services; Mobile payment; Mobile payment platform; Paved road; Quality perceptions; Service Quality; Sub-saharan africa; Trust; Quality of service	Akter S., Ray P., D'Ambra J., Continuance of mHealth services at the bottom of the pyramid: The roles of service quality and trust, Electronic Markets, 23, 1, pp. 29-47, (2013); Anderson J.C., Gerbing D.W., Structural equation modeling in practice: A review and recommended two-step approach, Psychological Bulletin, 103, 3, (1988); Awowi J.E., Ghana community information centers (CiCs) e-governanc…		Taylor and Francis Ltd.	8.6	Theme 5: health care, mhealth, india, internet of things	health care, mhealth, india, internet of things	Q1	5	136	0.2703	0.3017	47.4706	0.1609	0	0.5	0.6316	0.2105	5.3761	0.3943	0.0957	0.3027	0.015	0.3605	Q3: Niche / Transient	Q4: Frontier / Niche
Urbaczewski A.; Lee Y.J.	Information Technology and the pandemic: a preliminary multinational analysis of the impact of mobile tracking technology on the COVID-19 contagion control	2020	European Journal of Information Systems	70	10.1080/0960085X.2020.1802358	https://www.scopus.com/inward/record.uri?eid=2-s2.0-85089187939&doi=10.1080%2f0960085X.2020.1802358&partnerID=40&md5=fc3d046b02154caef918f53cefe13c73	This paper explores the benefits and drawbacks of government surveillance within a public health crisis, specifically the COVID-19 outbreak of 2020. We review the current state of COVID-19 infection tracking by public health authorities, and then we examine the effectiveness of voluntary and mandatory mobile contact-tracing apps by COVID-19-positive or suspected positive individuals in China, Ger…	COVID-19 Pandemic Control; IT impact on society; Kieran Conboy; Michael Myers; mobile tracking technology; Pär Ågerfalk; surveillance	Information systems; Data governances; Difference-in-differences; Ethical implications; Individual privacy; Mobile contacts; Mobile tracking; Robustness tests; South Korea; Public health	Agerfalk P.J., Conboy K., Myers M.D., Information systems in the age of pandemics: COVID-19 and beyond, European Journal of Information Systems, pp. 1-5, (2020); Angrist J.D., Krueger A.B., Chapter 23 Empirical strategies in labor economics, Handbook of labor economics, (1999); Barry J., How the horrific 1918 influenza spread across America, Smithsonianmag.Com, (2017); Bay J., Automated contact t…		Taylor and Francis Ltd.	8.6	Theme 9: virtual reality, tourism, travel behavior, tourist destination	virtual reality, tourism, travel behavior, tourist destination	Q1	9	131	0.615	0.2999	73.1527	0.3852	0	0.5	0.4167	0.1389	4.9732	0.2504	0.1577	1	0.0208	0.5899	Q1: Core / Established	Q1: Emerging / Growth
Wenninger H.; Krasnova H.; Buxmann P.	Understanding the role of social networking sites in the subjective well-being of users: a diary study	2019	European Journal of Information Systems	40	10.1080/0960085X.2018.1496883	https://www.scopus.com/inward/record.uri?eid=2-s2.0-85052128471&doi=10.1080%2f0960085X.2018.1496883&partnerID=40&md5=88653a2f3e52531d90404e46c022a986	Given the rising popularity of social networking sites (SNSs), the influence of these platforms on the subjective well-being (SWB) of their users is an emerging topic in information systems research. Building on the norm of reciprocity and the social functional approach to positive emotions, we posit that targeted reciprocity-evoking forms of SNS activities are best suited to promote users’ posit…	adolescents; Dov Te’eni; norm of reciprocity; Sabine Matook; social functional approach to positive emotions; Social networking sites; subjective well-being; targeted vs non-targeted SNS activities	Information systems; adolescents; Non-targeted; norm of reciprocity; Positive emotions; Social networking sites; Well being; Social networking (online)	Aggarwal A., Hajer K., Vogel D., Social media - The new global normal?, ECIS 2016 Track [Online, (2015); Ainsworth M.S., Attachments beyond infancy, American Psychologist, 44, pp. 709-716, (1989); Ali-Hassan H., Nevo D., Wade M., Linking dimensions of social media use to job performance: The role of social capital, The Journal of Strategic Information Systems, 24, pp. 65-89, (2015); Allen J.P., H…		Taylor and Francis Ltd.	8.6	Theme 8: social media, social networking (online), knowledge, psychology	social media, social networking (online), knowledge, psychology	Q1	8	112	0.5845	0.1818	113.589	0.7384	0	0.5	0.2083	0.0694	5.2199	0.3385	0.096	0.3056	0.0183	0.4931	Q1: Core / Established	Q2: Mature / Potential
Klein R.	An empirical examination of patient-physician portal acceptance	2007	European Journal of Information Systems	102	10.1057/palgrave.ejis.3000719	https://www.scopus.com/inward/record.uri?eid=2-s2.0-37249029818&doi=10.1057%2fpalgrave.ejis.3000719&partnerID=40&md5=900c7c3d311abb1e6aecb24536e5a810	Healthcare providers have recently begun deploying Internet-based patient-physician portals. These applications allow patients to both communicate with their providers and access personal medical information, such as laboratory results. Research within medical informatics explores, and debates, the utility of such functions from the patient and physician perspectives. However, work does not exami…	Computer self-efficacy; Healthcare; Patient-physician portals; Personal innovativeness with information technology; TAM		ADLER K.G., Web portals in primary care: An evaluation of patient readiness and willingness to pay for online services, Journal of Medical Internet Resources, 8, 4, pp. 1-26, (2006); AGARWAL R., KARAHANNA E., Time flies when you're having fun: Cognitive absorption and beliefs about information technology usage, MIS Quarterly, 24, 4, pp. 665-695, (2000); AGARWAL R., PRASAD J., A conceptual and ope…		Palgrave Macmillan Ltd.	8.6	Theme 5: health care, mhealth, india, internet of things	health care, mhealth, india, internet of things	Q1	5	136	0.2703	0.3017	47.4706	0.1609	0	0.5	0.6316	0.2105	5.3761	0.3943	0.0957	0.3027	0.015	0.3605	Q3: Niche / Transient	Q4: Frontier / Niche
Wittkowski K.; Klein J.F.; Falk T.; Schepers J.J.L.; Aspara J.; Bergner K.N.	What Gets Measured Gets Done: Can Self-Tracking Technologies Enhance Advice Compliance?	2020	Journal of Service Research	16	10.1177/1094670520904424	https://www.scopus.com/inward/record.uri?eid=2-s2.0-85079403728&doi=10.1177%2f1094670520904424&partnerID=40&md5=c83c631dfd08f8972606facd266c5307	Self-tracking technologies (STTs) in the form of smart devices and mobile applications enable consumers to monitor, analyze, and interpret personal performance data on health and physical or financial well-being. As a result of self-tracking, consumers are not only expected to check their personal performance more actively but also to implement service professionals’ advice to improve their well-…	advice compliance; field experiment; Quantified Self; self-efficacy; self-tracking technology; smart devices; technology adoption		Abele A.E., Gendolla G.H.E., Individual Differences in Optimism Predict the Recall of Personally Relevant Information, Personality and Individual Differences, 43, 5, pp. 1125-1135, (2007); 2018 Consumer Survey on Digital Health—US Results,, (2018); Albarracin D., Johnson B.T., Fishbein M., Muellerleile P.A., Theories of Reasoned Action and Planned Behavior as Models of Condom Use: A Meta-Analysis…		SAGE Publications Inc.	8.6	Theme 9: virtual reality, tourism, travel behavior, tourist destination	virtual reality, tourism, travel behavior, tourist destination	Q1	9	131	0.615	0.2999	73.1527	0.3852	0	0.5	0.4167	0.1389	4.9732	0.2504	0.1577	1	0.0208	0.5899	Q1: Core / Established	Q1: Emerging / Growth
Boo H.C.; Chua B.-L.	An integrative model of facial recognition check-in technology adoption intention: the perspective of hotel guests in Singapore	2022	International Journal of Contemporary Hospitality Management	11	10.1108/IJCHM-12-2021-1471	https://www.scopus.com/inward/record.uri?eid=2-s2.0-85131453696&doi=10.1108%2fIJCHM-12-2021-1471&partnerID=40&md5=ccc7a0a12a1178dc6fef171a113ca0da	Purpose: This study aims to explain how hotel guests form attitudes toward facial recognition technology in Singapore by integrating technology acceptance model (TAM), privacy calculus theory and personal innovativeness. Design/methodology/approach: A self-administered online questionnaire was developed with measurements adopted from past research. Guests who stayed in four- or five-star hotels i…	Biometric technology; Institutional trust; Perceived risk; Personal innovativeness; Privacy concern; Technology acceptance model		Alalwan A.A., Baabdullah A.M., Rana N.P., Tamilmani K., Dwivedi Y.K., Examining adoption of mobile internet in Saudi Arabia: extending TAM with perceived enjoyment, innovativeness and trust, Technology in Society, 55, pp. 100-110, (2018); Andrejevic M., Selwyn N., Facial recognition technology in schools: critical questions and concerns, Learning, Media and Technology, 45, 2, pp. 115-128, (2020);…		Emerald Publishing	9	Theme 10: retailing, mobile phone, shopping activity, social influence	retailing, mobile phone, shopping activity, social influence	Q1	10	90	0.5901	0.2244	68.1556	0.3416	0	0.5	0.0526	0.0175	4.2725	0	0.1463	0.8713	0.0249	0.75	Q1: Core / Established	Q1: Emerging / Growth
Mariani M.; Ek Styven M.; Ayeh J.K.	Using Facebook for travel decision-making: an international study of antecedents	2019	International Journal of Contemporary Hospitality Management	64	10.1108/IJCHM-02-2018-0158	https://www.scopus.com/inward/record.uri?eid=2-s2.0-85060163920&doi=10.1108%2fIJCHM-02-2018-0158&partnerID=40&md5=a2e230bc355d0a37c60ef5fa22e42f2d	Purpose: This paper aims to investigate antecedents of using non-travel-specific social media (specifically Facebook) for travel decision-making before a leisure trip. Design/methodology/approach: Based on an online survey of 426 young travel consumers from Italy and Sweden, this work applies structural equation modeling and multi-group analysis. Findings: The study finds support for most of the …	Enjoyment; Facebook; Social media; Technology acceptance model; Young travelers		Adams D.A., Nelson R.R., Todd P.A., Perceived usefulness, Ease of use, and usage of information technology: a replication, MIS Quarterly, 16, 2, pp. 227-247, (1992); Agag G., El-Masry A.A., Understanding consumer intention to participate in online travel community and effects on consumer intention to purchase travel online and WOM: an integration of innovation diffusion theory and TAM with trust,…		Emerald Group Holdings Ltd.	9	Theme 8: social media, social networking (online), knowledge, psychology	social media, social networking (online), knowledge, psychology	Q1	8	112	0.5845	0.1818	113.589	0.7384	0	0.5	0.2083	0.0694	5.2199	0.3385	0.096	0.3056	0.0183	0.4931	Q1: Core / Established	Q2: Mature / Potential
Mejia C.; Torres E.N.	Implementation and normalization process of asynchronous video interviewing practices in the hospitality industry	2018	International Journal of Contemporary Hospitality Management	14	10.1108/IJCHM-07-2016-0402	https://www.scopus.com/inward/record.uri?eid=2-s2.0-85043340219&doi=10.1108%2fIJCHM-07-2016-0402&partnerID=40&md5=d6fda77ec049eed15554ec463d6262d4	Purpose: Asynchronous video interviews (AVIs) enable recruiters and job candidates to conduct and review employment interviews at different points in time, promising improved cost and time efficiencies for all users. This research aims to investigate the implementation and normalization process of AVI in the hospitality industry with the unified theory of acceptance and use of technology (UTAUT) …	Asynchronous video interviews; Employee selection; Hospitality industry; Normalization process theory; Qualitative research; Technology implementation		Ajzen I., Fishbein M., Understanding Attitudes and Predicting Social Behavior, (1980); Brynjolfsson E., McAfee A., Race against the Machine: How the Digital Revolution Is Accelerating Innovation, Driving Productivity, and Irreversibly Transforming Employment and the Economy. [eBook], (2011); Campbell J.L., Quincy C., Osserman J., Pedersen O.K., Coding in-depth semistructured interviews: problems …		Emerald Group Publishing Ltd.	9	Theme 9: virtual reality, tourism, travel behavior, tourist destination	virtual reality, tourism, travel behavior, tourist destination	Q1	9	131	0.615	0.2999	73.1527	0.3852	0	0.5	0.4167	0.1389	4.9732	0.2504	0.1577	1	0.0208	0.5899	Q1: Core / Established	Q1: Emerging / Growth
Ozturk A.B.	Customer acceptance of cashless payment systems in the hospitality industry	2016	International Journal of Contemporary Hospitality Management	82	10.1108/IJCHM-02-2015-0073	https://www.scopus.com/inward/record.uri?eid=2-s2.0-84971607495&doi=10.1108%2fIJCHM-02-2015-0073&partnerID=40&md5=9f2305656a34826038dcc808e2bc5506	The purpose of this study is to propose and test an extended version of technology acceptance model (TAM) to examine consumers’ acceptance of radio frequency identification (RFID) cashless payment systems in the hospitality industry. Design/methodology/approachA comprehensive structural model was developed by adding two additional constructs to original TAM, namely, self-efficacy and perceived ri…	Cashless payment; Perceived risk; RFID; Self-efficacy; Technology acceptance model		Bandura A., Social Foundations of Thought and Action, (1986); Bauer R.A., Consumer behavior as risk taking, Risk Taking and Information Handling in Consumer Behavior, pp. 389-398, (1960); Cashless Payment and RFID in the Sports Industry Status Quo and Future Development, (2012); Chen C.A., Perceived risk, usage frequency of mobile banking services, Managing Service Quality: An International Journ…		Emerald Group Publishing Ltd.	9	Theme 9: virtual reality, tourism, travel behavior, tourist destination	virtual reality, tourism, travel behavior, tourist destination	Q1	9	131	0.615	0.2999	73.1527	0.3852	0	0.5	0.4167	0.1389	4.9732	0.2504	0.1577	1	0.0208	0.5899	Q1: Core / Established	Q1: Emerging / Growth
Fletcher-Brown J.; Carter D.; Pereira V.; Chandwani R.	Mobile technology to give a resource-based knowledge management advantage to community health nurses in an emerging economies context	2020	Journal of Knowledge Management	24	10.1108/JKM-01-2020-0018	https://www.scopus.com/inward/record.uri?eid=2-s2.0-85089196582&doi=10.1108%2fJKM-01-2020-0018&partnerID=40&md5=8da2b9721c3291631057cb07033c3c98	Purpose: Knowledge is a key success factor in achieving competitive advantage. The purpose of this paper is to examine how mobile health technology facilitates knowledge management (KM) practices to enhance a public health service in an emerging economies context. Specifically, the acceptance of a knowledge-resource application by community health workers (CHWs) to deliver breast cancer health ca…	Breast cancer; India; Knowledge management; Signalling theory; TAM		Ajzen I., Fishbein M., Understanding Attitudes and Predicting Social Behavior, (1980); Bagozzi R., The legacy of the technology acceptance model and a proposal for a paradigm shift, Journal of the Association for Information Systems, 8, 4, pp. 244-254, (2007); Baines N., Smith H.L., Knowledge and capabilities for products/services development: the UK spin-off firms context, Journal of Knowledge M…		Emerald Group Holdings Ltd.	9.5	Theme 5: health care, mhealth, india, internet of things	health care, mhealth, india, internet of things	Q1	5	136	0.2703	0.3017	47.4706	0.1609	0	0.5	0.6316	0.2105	5.3761	0.3943	0.0957	0.3027	0.015	0.3605	Q3: Niche / Transient	Q4: Frontier / Niche
Nguyen T.-M.; Malik A.	Employee acceptance of online platforms for knowledge sharing: exploring differences in usage behaviour	2022	Journal of Knowledge Management	11	10.1108/JKM-06-2021-0420	https://www.scopus.com/inward/record.uri?eid=2-s2.0-85117250292&doi=10.1108%2fJKM-06-2021-0420&partnerID=40&md5=77cd4ed9d660ca3acb9679434e4cc281	Purpose: This paper aims to examine the technology acceptance model’s applicability in understanding employees’ acceptance of online platforms for knowledge sharing in organisations. Specifically, this research explores gender differences in using online platforms for sharing knowledge at the workplace in an emerging market context and the role of individuals’ motivation in online platform usage …	Gender; Knowledge sharing; Motivation; Online platforms; Technology acceptance; Technology acceptance model		Abukhait R.M., Bani-Melhem S., Zeffane R., Empowerment, knowledge sharing and innovative behaviours: exploring gender differences, International Journal of Innovation Management, 23, 1, (2019); Ahuja M.K., Thatcher J.B., Moving beyond intentions and toward the theory of trying: effects of work environment and gender on post-adoption information technology use, MIS Quarterly, 29, 3, pp. 427-459, (…		Emerald Publishing	9.5	Theme 8: social media, social networking (online), knowledge, psychology	social media, social networking (online), knowledge, psychology	Q1	8	112	0.5845	0.1818	113.589	0.7384	0	0.5	0.2083	0.0694	5.2199	0.3385	0.096	0.3056	0.0183	0.4931	Q1: Core / Established	Q2: Mature / Potential
Bracci E.; Tallaki M.; Ievoli R.; Diplotti S.	Knowledge, diffusion and interest in blockchain technology in SMEs	2022	Journal of Knowledge Management	27	10.1108/JKM-02-2021-0099	https://www.scopus.com/inward/record.uri?eid=2-s2.0-85113827771&doi=10.1108%2fJKM-02-2021-0099&partnerID=40&md5=ae10c52eb589272ba3745976ae25a770	Purpose: The paper aims to understand the possible determinants of knowledge of, and interest in using, blockchain, with a particular focus in the future intention to apply this technology. Blockchain technology is deemed to radically change business models and processes. Using this technology in small and medium enterprises (SMEs) is still a novel idea. Moreover, not much is known about the diff…	Blockchain diffusion; Blockchain knowledge; Interest in blockchain; Knowledge; Usefulness; Usefulness and ease to use of blockchain		Abou Jaoude J., George Saade R., Blockchain applications - usage in different domains, IEEE Access, 7, pp. 45360-45381, (2019); Agbo C., Mahmoud Q., Eklund J., Blockchain technology in healthcare: a systematic review, Healthcare, 7, 2, (2019); Agresti A., Categorical Data Analysis, 482, (2003); Akaike H., A new look at the statistical model identification, IEEE Transactions on Automatic Control, …		Emerald Group Holdings Ltd.	9.5	Theme 8: social media, social networking (online), knowledge, psychology	social media, social networking (online), knowledge, psychology	Q1	8	112	0.5845	0.1818	113.589	0.7384	0	0.5	0.2083	0.0694	5.2199	0.3385	0.096	0.3056	0.0183	0.4931	Q1: Core / Established	Q2: Mature / Potential
Chakraborty D.; Babu Singu H.; Kumar Kar A.; Biswas W.	From fear to faith in the adoption of medicine delivery application: An integration of SOR framework and IRT theory	2023	Journal of Business Research	1	10.1016/j.jbusres.2023.114140	https://www.scopus.com/inward/record.uri?eid=2-s2.0-85164004176&doi=10.1016%2fj.jbusres.2023.114140&partnerID=40&md5=b5efec0ac5a883842f2ee5963dc073d6	The current study tries to better understand the different consumer barriers towards adoption of MDAs and their psychological and behavioural responses through the lens of innovation resistance and S-O-R framework respectively. A longitudinal study was conducted with two surveys spanning over a period of two years to attain the research goals with a sample size exceeding four hundred users from I…	Emerging economy; Innovation resistance theory; Mobile applications; Stimulus-organism-response; Technology adoption		Al-Adwan A.S., Sammour G., What makes consumers purchase mobile apps: Evidence from Jordan, Journal of Theoretical and Applied Electronic Commerce Research, 16, 3, pp. 562-583, (2020); Anshu K., Gaur L., Singh G., Impact of customer experience on attitude and repurchase intention in online grocery retailing: A moderation mechanism of value Co-creation, Journal of Retailing and Consumer Services, …		Elsevier Inc.	9.8	Theme 10: retailing, mobile phone, shopping activity, social influence	retailing, mobile phone, shopping activity, social influence	Q1	10	90	0.5901	0.2244	68.1556	0.3416	0	0.5	0.0526	0.0175	4.2725	0	0.1463	0.8713	0.0249	0.75	Q1: Core / Established	Q1: Emerging / Growth
Duarte P.; Pinho J.C.	A mixed methods UTAUT2-based approach to assess mobile health adoption	2019	Journal of Business Research	164	10.1016/j.jbusres.2019.05.022	https://www.scopus.com/inward/record.uri?eid=2-s2.0-85066262357&doi=10.1016%2fj.jbusres.2019.05.022&partnerID=40&md5=40a03cdcf0ea8fd9fb317dbcdd8e51cb	Drawing on UTAUT2, this study examines the number of causal recipes that foster mHealth adoption, using a mixed approach combining Partial Least Squares (PLS-SEM) and fuzzy-set qualitative comparative analysis. Two general research propositions are assessed using data collected through a survey administered to 120 mHealth users. The findings point that PLS-SEM and fsQCA are complementary analytic…	Fuzzy-Set QCA; Mobile health; Patients; PLS; Technology adoption; User perception; UTAUT2		(2019); Boontarig W., Effect of personality factors on attitude towards the adoption of health information via online social networking, 2016 international computer science and engineering conference (ICSEC), pp. 1-6, (2016); Boontarig W., Chutimaskul W., Chongsuphajaisiddhi V., Papasratorn B., Factors influencing the Thai elderly intention to use smartphone for e-Health services, SHUSER 2012–201…		Elsevier Inc.	9.8	Theme 5: health care, mhealth, india, internet of things	health care, mhealth, india, internet of things	Q1	5	136	0.2703	0.3017	47.4706	0.1609	0	0.5	0.6316	0.2105	5.3761	0.3943	0.0957	0.3027	0.015	0.3605	Q3: Niche / Transient	Q4: Frontier / Niche
Kamaha Njiwa M.; Atif M.; Arshad M.; Mirza N.	The impact of female dominance on business resilience: A technology adoption perspective	2023	Journal of Business Research	1	10.1016/j.jbusres.2023.113846	https://www.scopus.com/inward/record.uri?eid=2-s2.0-85150202285&doi=10.1016%2fj.jbusres.2023.113846&partnerID=40&md5=cdba6b884fab09c21bb3c9ad76e41e60	This study explores the relationship between women entrepreneurship and business resilience, the moderation of pre-crisis and during-crisis technology adoption, and female representation in top management in the aforementioned relationship. Building on the “mom-cession” theory, the authors propose an integrated multiple-moderation model to understand the boundary conditions that can reduce the ne…	Business resilience; COVID-19; Female dominance; Gender; Technology adoption		Abed S.S., A literature review exploring the role of technology in business survival during the Covid-19 lockdowns, International Journal of Organizational Analysis, 30, 5, pp. 1045-1062, (2022); Adim C.V., Mezeh A.A., Technological capability and organizational survival of hotels in Port Harcourt, Rivers State, Nigeria. Academic Journal of Current Research, 7, 8, pp. 86-100, (2020); Ahmed Z., As…		Elsevier Inc.	9.8	Theme 10: retailing, mobile phone, shopping activity, social influence	retailing, mobile phone, shopping activity, social influence	Q1	10	90	0.5901	0.2244	68.1556	0.3416	0	0.5	0.0526	0.0175	4.2725	0	0.1463	0.8713	0.0249	0.75	Q1: Core / Established	Q1: Emerging / Growth
Yim M.Y.-C.; Park S.-Y.	“I am not satisfied with my body, so I like augmented reality (AR)”: Consumer responses to AR-based product presentations	2019	Journal of Business Research	110	10.1016/j.jbusres.2018.10.041	https://www.scopus.com/inward/record.uri?eid=2-s2.0-85055547101&doi=10.1016%2fj.jbusres.2018.10.041&partnerID=40&md5=28d9af78ff8b1d900761e8c86b1c3c52	Augmented reality (AR)-based virtual try-on product presentations allow consumers to assess how well the displayed products match their actual bodies, unlike traditional Web-based product presentations. This study examines the important role of the consumer's perceived body image in consumer evaluation and intention to adopt AR-based virtual try-on technology. The study compares consumer response…	Augmented reality; Body image; Interactivity; Irritation; Technology adoption		Andrews J.C., Akhter S.H., Durvasula S., Muehling D.D., The effects of advertising distinctiveness and message content involvement on cognitive and affective responses to advertising, Journal of Current Issues and Research in Advertising, 14, 1, pp. 45-58, (1992); Anitha N., Selvaraj C., The effects of mannequins on consumers' perception and shopping attitude, Information Processing and Managemen…		Elsevier Inc.	9.8	Theme 9: virtual reality, tourism, travel behavior, tourist destination	virtual reality, tourism, travel behavior, tourist destination	Q1	9	131	0.615	0.2999	73.1527	0.3852	0	0.5	0.4167	0.1389	4.9732	0.2504	0.1577	1	0.0208	0.5899	Q1: Core / Established	Q1: Emerging / Growth
Pal S.; Biswas B.; Gupta R.; Kumar A.; Gupta S.	Exploring the factors that affect user experience in mobile-health applications: A text-mining and machine-learning approach	2023	Journal of Business Research	12	10.1016/j.jbusres.2022.113484	https://www.scopus.com/inward/record.uri?eid=2-s2.0-85144032509&doi=10.1016%2fj.jbusres.2022.113484&partnerID=40&md5=e843d74de26e55c5b98d743fd08d9877	Recent years have witnessed an increased demand for mobile health (mHealth) platforms owing to the COVID-19 pandemic and preference for doorstep delivery. However, factors impacting user experiences and satisfaction levels across these platforms, using customer reviews, are still largely unexplored in academic research. The empirical framework we proposed in this paper addressed this research gap…	Machine learning; Mobile health; Proportional-odds logit; Service-dominant logic; Text analytics		Agerfalk P.J., Conboy K., Myers M.D., Information systems in the age of pandemics: COVID-19 and beyond, European Journal of Information Systems, 29, 3, pp. 203-207, (2020); Akter S., D'Ambra J., Ray P., Development and validation of an instrument to measure user perceived service quality of mHealth, Information & Management, 50, 4, pp. 181-195, (2013); Akter S., Ray P., D'Ambra J., Continuance of…		Elsevier Inc.	9.8	Theme 5: health care, mhealth, india, internet of things	health care, mhealth, india, internet of things	Q1	5	136	0.2703	0.3017	47.4706	0.1609	0	0.5	0.6316	0.2105	5.3761	0.3943	0.0957	0.3027	0.015	0.3605	Q3: Niche / Transient	Q4: Frontier / Niche
Han S.-L.; An M.; Han J.J.; Lee J.	Telepresence, time distortion, and consumer traits of virtual reality shopping	2020	Journal of Business Research	64	10.1016/j.jbusres.2020.06.056	https://www.scopus.com/inward/record.uri?eid=2-s2.0-85087673098&doi=10.1016%2fj.jbusres.2020.06.056&partnerID=40&md5=416fa15bb898dc0dacc4bcfb88d9bf88	Even though VR(Virtual Reality) shopping provides new opportunities for today's marketers, it is not readily embraced by consumers. In this research, we aim to understand the underlying factors that facilitate the adoption of VR technology, by incorporating the consumer flow theory and the Technology Acceptance Model (TAM). Specifically, we find that factors that enhance consumer flow (i.e., tele…	Flow; Telepresence; Time distortion; Virtual Reality; VR shopping		Abuhamdeh S., Csikszentmihalyi M., The importance of challenge for the enjoyment of intrinsically motivated, goal-directed activities, Personality and Social Psychology Bulletin, 38, 3, pp. 317-330, (2012); Animesh A., Pinsonneault A., Yang S.B., Oh W., An odyssey into virtual worlds: Exploring the impacts of technological and spatial environments on intention to purchase virtual products, MIS Qu…		Elsevier Inc.	9.8	Theme 9: virtual reality, tourism, travel behavior, tourist destination	virtual reality, tourism, travel behavior, tourist destination	Q1	9	131	0.615	0.2999	73.1527	0.3852	0	0.5	0.4167	0.1389	4.9732	0.2504	0.1577	1	0.0208	0.5899	Q1: Core / Established	Q1: Emerging / Growth
Crittenden V.L.; Crittenden W.F.; Ajjan H.	Empowering women micro-entrepreneurs in emerging economies: The role of information communications technology	2019	Journal of Business Research	91	10.1016/j.jbusres.2019.01.045	https://www.scopus.com/inward/record.uri?eid=2-s2.0-85061037073&doi=10.1016%2fj.jbusres.2019.01.045&partnerID=40&md5=c76ad9168e3cdf1e410108e0b35f7371	Drawing upon the Technology Acceptance Model (TAM), this research investigated the impact of information communications technology (ICT) on self-efficacy, social capital, and empowerment in the overlooked context of women micro-entrepreneurs. In addition to testing the original TAM constructs of usefulness and perceived ease of use, this research extended TAM to ICT use outcomes. Data were collec…	Empowerment; Information communication technologies; Self-efficacy; Social capital; Technology Acceptance Model; Women micro-entrepreneurs		Abor J., Quartey P., Issues in SME development in Ghana and South Africa, International Research Journal of Finance and Economics, 39, pp. 218-228, (2010); Afshar H., Alikhan F., Age and empowerment amongst slum dwelling women in Hyderabad, Journal of International Development: The Journal of the Development Studies Association, 14, 8, pp. 1153-1161, (2002); Agnihotri R., Kothandaraman P., Kashya…		Elsevier Inc.	9.8	Theme 9: virtual reality, tourism, travel behavior, tourist destination	virtual reality, tourism, travel behavior, tourist destination	Q1	9	131	0.615	0.2999	73.1527	0.3852	0	0.5	0.4167	0.1389	4.9732	0.2504	0.1577	1	0.0208	0.5899	Q1: Core / Established	Q1: Emerging / Growth
Manis K.T.; Choi D.	The virtual reality hardware acceptance model (VR-HAM): Extending and individuating the technology acceptance model (TAM) for virtual reality hardware	2019	Journal of Business Research	225	10.1016/j.jbusres.2018.10.021	https://www.scopus.com/inward/record.uri?eid=2-s2.0-85054644946&doi=10.1016%2fj.jbusres.2018.10.021&partnerID=40&md5=924b04c991457ca8d87db4bdb205c009	With the emergence of virtual reality, several challenges are posed to marketers, developers, and firms alike. These challenges concern futurity in the context of content creation, consumer acceptance, and return on investment (ROI). This manuscript focuses on these challenges by extending the technology acceptance model (TAM) by incorporating perceived enjoyment as a key belief variable and incl…	Age; Curiosity; Enjoyment; Past use; Technology acceptance model; Virtual reality		Adscode, Infographic: LinkedIn facts & stats 2018, (2018); Ajzen I., The theory of planned behavior, Organizational Behavior and Human Decision Processes, 50, pp. 179-211, (1991); Ajzen I., Fishbein M., Attitude-behavior relations: A theoretical analysis and review of empirical research, Psychological Bulletin, 84, 5, pp. 888-918, (1977); Ajzen I., Fishbein M., Understanding attitudes and predict…		Elsevier Inc.	9.8	Theme 9: virtual reality, tourism, travel behavior, tourist destination	virtual reality, tourism, travel behavior, tourist destination	Q1	9	131	0.615	0.2999	73.1527	0.3852	0	0.5	0.4167	0.1389	4.9732	0.2504	0.1577	1	0.0208	0.5899	Q1: Core / Established	Q1: Emerging / Growth
Iglesias-Pradas S.; Hernández-García Á.; Fernández-Cardador P.	Social factors' influences on corporate wiki acceptance and use	2015	Journal of Business Research	18	10.1016/j.jbusres.2015.01.038	https://www.scopus.com/inward/record.uri?eid=2-s2.0-84927956543&doi=10.1016%2fj.jbusres.2015.01.038&partnerID=40&md5=2b32ed3f29813dac9344817e3841ba00	This study investigates how social factors affect the use of corporate wikis to share knowledge in organizations. Adopting a holistic approach, the study fills the gap in research on social factors' influence on collaborative knowledge sharing. The study thereby identifies relevant factors for successful knowledge sharing using Web 2.0 tools. Building on research into knowledge sharing, technolog…	Collaboration; Knowledge acquisition; Knowledge diffusion; Social influence; Wikis		Ashton D., Awarding the self in Wikipedia: Identity work and the disclosure of knowledge, First Monday, 16, 3, (2011); Bagozzi R.P., Dholakia U.M., Intentional social action in virtual communities, Journal of Interactive Marketing, 16, 2, pp. 2-21, (2002); Bagozzi R.P., Lee K., Multiple routes for social influence: the role of compliance, internalization, and social identity, Social Psychology Qu…		Elsevier Inc.	9.8	Theme 10: retailing, mobile phone, shopping activity, social influence	retailing, mobile phone, shopping activity, social influence	Q1	10	90	0.5901	0.2244	68.1556	0.3416	0	0.5	0.0526	0.0175	4.2725	0	0.1463	0.8713	0.0249	0.75	Q1: Core / Established	Q1: Emerging / Growth
Pascual-Miguel F.J.; Agudo-Peregrina Á.F.; Chaparro-Peláez J.	Influences of gender and product type on online purchasing	2015	Journal of Business Research	153	10.1016/j.jbusres.2015.01.050	https://www.scopus.com/inward/record.uri?eid=2-s2.0-84927979090&doi=10.1016%2fj.jbusres.2015.01.050&partnerID=40&md5=284b745d3a9f2a5eb89f3d4d09894e49	This study examines gender differences in the online purchasing behavior of consumers who purchase digital and non-digital goods. The research model builds upon the extended unified theory of acceptance and use of technology (UTAUT2), adding two key e-commerce variables: perceived risk and trust. Empirical analysis uses data from 817 Spanish consumers' responses to an online questionnaire. Gender…	Consumer behavior; Digital goods; Electronic commerce; Gender; Online shopping; Purchase intention		Ajzen I., The theory of planned behavior, Organizational Behavior and Human Decision Processes, 50, 2, pp. 179-211, (1991); Chang S., Internet segmentation, Journal of Segmentation in Marketing, 2, 1, pp. 19-34, (1998); Chang H.H., Task-technology fit and user acceptance of online auction, International Journal of Human-Computer Studies, 68, 1-2, pp. 69-89, (2010); Chen S.C., Dhillon G.S., Interp…		Elsevier Inc.	9.8	Theme 8: social media, social networking (online), knowledge, psychology	social media, social networking (online), knowledge, psychology	Q1	8	112	0.5845	0.1818	113.589	0.7384	0	0.5	0.2083	0.0694	5.2199	0.3385	0.096	0.3056	0.0183	0.4931	Q1: Core / Established	Q2: Mature / Potential
Wu J.-H.; Wu C.-W.; Lee C.-T.; Lee H.-J.	Green purchase intentions: An exploratory study of the Taiwanese electric motorcycle market	2015	Journal of Business Research	93	10.1016/j.jbusres.2014.11.036	https://www.scopus.com/inward/record.uri?eid=2-s2.0-84923081952&doi=10.1016%2fj.jbusres.2014.11.036&partnerID=40&md5=06e3515caddfc6b85ada13a209b475e8	This study examines the antecedents of purchase intention and the relation between purchase intention and image, risk, value, and perceived usefulness in the electric motorcycle market. The paper investigates a number of important questions concerning how image, risk, value, and perceived usefulness affect purchase intention. This article offers suggestions for campaigns aiming at increasing cons…	Electric motorcycles; Image; Perceived usefulness; Purchase intention; Risk; Value		Ajzen I., From intentions to actions: A theory of planned behavior, Action Control: From Cognition to Behavior, pp. 101-128, (1985); Ajzen I., Fishbein M., Understanding attitudes and predicting social behavior, (1980); Andreassen T.W., Lindestad B., Customer loyalty and complex services: The impact of corporate image on quality, customer satisfaction and loyalty for customers with varying degree…		Elsevier Inc.	9.8	Theme 8: social media, social networking (online), knowledge, psychology	social media, social networking (online), knowledge, psychology	Q1	8	112	0.5845	0.1818	113.589	0.7384	0	0.5	0.2083	0.0694	5.2199	0.3385	0.096	0.3056	0.0183	0.4931	Q1: Core / Established	Q2: Mature / Potential
Lee Y.-K.; Park J.-H.; Chung N.; Blakeney A.	A unified perspective on the factors influencing usage intention toward mobile financial services	2012	Journal of Business Research	194	10.1016/j.jbusres.2011.02.044	https://www.scopus.com/inward/record.uri?eid=2-s2.0-84867464709&doi=10.1016%2fj.jbusres.2011.02.044&partnerID=40&md5=5db5fb2450d55910e22f4d5fa732ac67	This research proposes that the factors influencing the intention to use mobile financial services (MFS) include general technology perceptions, technology-specific perceptions, user characteristics, and task-user characteristics. Most previous research examines customer satisfaction with MFS. However, this research does not explain why MFS is expanding relatively more slowly than Internet financ…	Absorptive capacity; Connectivity; Mobile financial services; Personal innovativeness; Structural equation modeling; Task-technology fit; Technology acceptance model		Agarwal R., Prasad J., A conceptual and operational definition of personal innovativeness in the domain of information technology, Inf Syst Res, 9, 2, pp. 204-215, (1998); Ajzen I., Fishbein M., Understanding attitudes and predicting social behavior, (1980); Anderson J.C., Gerbing D.W., Assumptions and comparative strengths of the two-step approach, Sociol Methods Res, 20, 3, pp. 321-333, (1992);…			9.8	Theme 10: retailing, mobile phone, shopping activity, social influence	retailing, mobile phone, shopping activity, social influence	Q1	10	90	0.5901	0.2244	68.1556	0.3416	0	0.5	0.0526	0.0175	4.2725	0	0.1463	0.8713	0.0249	0.75	Q1: Core / Established	Q1: Emerging / Growth
Robinson Jr. L.; Marshall G.W.; Stamps M.B.	Sales force use of technology: Antecedents to technology acceptance	2005	Journal of Business Research	119	10.1016/j.jbusres.2004.07.010	https://www.scopus.com/inward/record.uri?eid=2-s2.0-27744437928&doi=10.1016%2fj.jbusres.2004.07.010&partnerID=40&md5=53f2e40f8f2e5d93dc4ddc8fb72559ec	This study investigates the impact of the beliefs and attitudes of field salespeople on technology usage. The sales force use of technology model developed here delineates the relationships that exist among various organizational and individual difference variables and the technology acceptance model (TAM) as conceptualized by Davis (1989) and Davis et al. (1989). Results reveal support for the T…	Perceived ease of use of technology; Perceived usefulness of technology; Sales force; Technology acceptance; Theory of reasoned action		Adams D.A., Nelson R.R., Todd P.A., Perceived usefulness, ease of use, and usage of information, MIS Q., 16, pp. 227-247, (1992); Agarwal R., Prasad J., A conceptual and operational definition of personal innovativeness in the domain of information technology, Inf. Syst. Res., 9, pp. 204-215, (1998); Agarwal R., Prasad J., Are individual differences germane to the acceptance of new information te…			9.8	Theme 5: health care, mhealth, india, internet of things	health care, mhealth, india, internet of things	Q1	5	136	0.2703	0.3017	47.4706	0.1609	0	0.5	0.6316	0.2105	5.3761	0.3943	0.0957	0.3027	0.015	0.3605	Q3: Niche / Transient	Q4: Frontier / Niche
Hua J.; Lin J.; Wang K.; Liu G.	Government interventions in new technology adoption to improve product greenness	2023	International Journal of Production Economics	3	10.1016/j.ijpe.2023.108924	https://www.scopus.com/inward/record.uri?eid=2-s2.0-85160418352&doi=10.1016%2fj.ijpe.2023.108924&partnerID=40&md5=d5198d2dcc4aaa1387696507412a3ce2	Motivated by the increasing importance of achieving green production in a low-carbon economy, this study investigates the role of government interventions in new technology adoption to increase product greenness. The study contributes to existing research by considering the government's roles in subsidy and regulation policies and analysing how government policies affect consumer surplus, manufac…	Environmental investment; Game theory; Government intervention; Product greenness; Technology adoption	Budget control; Economics; Environmental technology; Renewable energy resources; Cost-intensive; Environmental investments; Government intervention; Green production; Green products; Marginal costs; Product cost; Product greenness; Social welfare; Technology adoption; Game theory	Alizamir S., Iravani F., Mamani H., An analysis of price vs. revenue protection: government subsidies in the agriculture industry, Manag. Sci., 65, 1, pp. 32-49, (2019); Anand K.S., Giraud-Carrier F.C., Pollution regulation of competitive markets, Manag. Sci., 66, 9, pp. 4193-4206, (2020); Anand K.S., Girotra K., The strategic perils of delayed differentiation, Manag. Sci., 53, 5, pp. 697-712, (2…		Elsevier B.V.	10	Theme 2: china, investments, electric vehicle, electric vehicles	china, investments, electric vehicle, electric vehicles	Q1	2	462	0.2421	0.3314	47.0952	0.1576	0	0.5	0.4028	0.1343	6.843	0.9185	0.0957	0.3025	0.0068	0.0356	Q4: Emerging / Structural	Q4: Frontier / Niche
Yee-Loong Chong A.; Liu M.J.; Luo J.; Keng-Boon O.	Predicting RFID adoption in healthcare supply chain from the perspectives of users	2015	International Journal of Production Economics	168	10.1016/j.ijpe.2014.09.034	https://www.scopus.com/inward/record.uri?eid=2-s2.0-84915749989&doi=10.1016%2fj.ijpe.2014.09.034&partnerID=40&md5=51b659c62fdd16a3874af22f7ff3aa2c	Radio frequency identification (RFID) is an internet of things technology that provides many benefits to the healthcare industry's supply chain. However, a challenge faced by healthcare industry is the limited adoption and use of RFID by physicians and nurses. This research extended existing work by integrating unified theory of acceptance and use of technology (UTAUT) (i.e. performance expectanc…	Healthcare; Internet of things; Neural network; RFID; Technology adoption	Chains; Economic and social effects; Forecasting; Health care; Internet of things; Neural networks; Nursing; Supply chains; Demographic characteristics; Facilitating conditions; Healthcare industry; Individual Differences; Internet of things technologies; Social influence; Technology adoption; The unified theory of acceptance and use of technology(UTAUT); Radio frequency identification (RFID)	Abushanab E., Pearson J., Internet banking in Jordan: The unified theory of acceptance and use of technology (UTAUT) perspective, J. Syst. Inf. Technol., 9, pp. 78-97, (2007); Aggelidis V.P., Chatzoglou P.D., Using a modified technology acceptance model in hospitals, Int. J. Med. Inf., 78, pp. 115-126, (2009); Chang M.K., Cheung W., Cheng C.H., Yeung J.H., Understanding ERP system adoption from t…		Elsevier	10	Theme 5: health care, mhealth, india, internet of things	health care, mhealth, india, internet of things	Q1	5	136	0.2703	0.3017	47.4706	0.1609	0	0.5	0.6316	0.2105	5.3761	0.3943	0.0957	0.3027	0.015	0.3605	Q3: Niche / Transient	Q4: Frontier / Niche
Qin W.; Sun Y.-N.; Zhuang Z.-L.; Lu Z.-Y.; Zhou Y.-M.	Multi-agent reinforcement learning-based dynamic task assignment for vehicles in urban transportation system	2021	International Journal of Production Economics	14	10.1016/j.ijpe.2021.108251	https://www.scopus.com/inward/record.uri?eid=2-s2.0-85112659156&doi=10.1016%2fj.ijpe.2021.108251&partnerID=40&md5=6ca0ce3ffa2e5ba88da305100b548e61	The task assignment for vehicles plays an important role in urban transportation system, which is the key to cost reduction and efficiency improvement. The development of information technology and the emergence of “sharing economy” create a more convenient transportation mode, but also bring a greater challenge to efficient operation of urban transportation system. On the one hand, considering t…	Actor-critic algorithm; Multi-agent reinforcement learning; Transportation task assignment; Urban transportation system	Combinatorial optimization; Cost reduction; Reinforcement learning; Stochastic systems; Urban transportation; Vehicles; Actor-critic algorithm; Assignment problems; Cost reduction and efficiencies; Cost-reduction improvement; Dynamic tasks; Efficiency improvement; Multi-agent reinforcement learning; Tasks assignments; Transportation task assignment; Urban transportation systems; Multi agent syste…	Babaeizadeh M., Frosio I., Tyree S., Clemons J., Kautz J., Reinforcement Learning through Asynchronous Advantage Actor-Critic on a Gpu, (2016); Ballot E., Montreuil B., Meller R., The Physical Internet, (2014); Bhatnagar S., Ghavamzadeh M., Lee M., Sutton R.S., Incremental natural actor-critic algorithms, Adv. Neural Inf. Process. Syst., pp. 105-112, (2008); Bouajaja S., Dridi N., Research on the…		Elsevier B.V.	10	Theme 2: china, investments, electric vehicle, electric vehicles	china, investments, electric vehicle, electric vehicles	Q1	2	462	0.2421	0.3314	47.0952	0.1576	0	0.5	0.4028	0.1343	6.843	0.9185	0.0957	0.3025	0.0068	0.0356	Q4: Emerging / Structural	Q4: Frontier / Niche
Bill F.; Feurer S.; Klarmann M.	Salesperson social media use in business-to-business relationships: An empirical test of an integrative framework linking antecedents and consequences	2020	Journal of the Academy of Marketing Science	60	10.1007/s11747-019-00708-z	https://www.scopus.com/inward/record.uri?eid=2-s2.0-85078632709&doi=10.1007%2fs11747-019-00708-z&partnerID=40&md5=12e5ad45755cee1fcb366c7be8bb4896	This study presents an empirical test of an integrative framework based on the Unified Theory of Acceptance and Use of Technology, capturing what drives salesperson social media use in business-to-business relationships and under which circumstances social media use affects customer loyalty. The authors test the framework by drawing on a unique hierarchical dataset with data from three sources (o…	B2B; Customer loyalty; Integrative framework; Salespeople; Social media; Technology acceptance		Agnihotri R., Dingus R., Hu M.Y., Krush M.T., Social media: Influencing customer satisfaction in B2B sales, Industrial Marketing Management, 53, February, pp. 172-180, (2016); Agnihotri R., Kothandaraman P., Kashyap R., Singh R., Bringing “social” into sales: The impact of Salespeople’s social media use on service behaviors and value creation, Journal of Personal Selling and Sales Management, 32,…		Springer	10.1	Theme 8: social media, social networking (online), knowledge, psychology	social media, social networking (online), knowledge, psychology	Q1	8	112	0.5845	0.1818	113.589	0.7384	0	0.5	0.2083	0.0694	5.2199	0.3385	0.096	0.3056	0.0183	0.4931	Q1: Core / Established	Q2: Mature / Potential
Homburg C.; Wieseke J.; Kuehnl C.	Social influence on salespeople's adoption of sales technology: A multilevel analysis	2010	Journal of the Academy of Marketing Science	99	10.1007/s11747-009-0157-x	https://www.scopus.com/inward/record.uri?eid=2-s2.0-79952900542&doi=10.1007%2fs11747-009-0157-x&partnerID=40&md5=c4cd02ff203025782343c5726f9638f7	The implementation of sales force automation applications (SFA) often fails owing to the lack of adoption by salespeople. Previous studies investigating drivers of salespeople's SFA adoption have mainly scrutinized predictors on the level of salespeople (within-level analysis). Hence, these studies have mostly neglected the social influence of coworkers' and superiors' SFA adoption on salespeople…	Informational cascades; Sales force automation; SFA adoption; Social influence; Technology acceptance model		Ahearne M., Jelinek R., Rapp A., Moving beyond the direct effect of SFA adoption on salesperson performance: Training and support as key moderating factors, Industrial Marketing Management, 34, 4, pp. 379-388, (2005); Ahearne M., Jones E., Rapp A., Mathieu J., High touch through high tech: The impact of salesperson technology usage on sales performance via mediating mechanisms, Management Science…			10.1	Theme 10: retailing, mobile phone, shopping activity, social influence	retailing, mobile phone, shopping activity, social influence	Q1	10	90	0.5901	0.2244	68.1556	0.3416	0	0.5	0.0526	0.0175	4.2725	0	0.1463	0.8713	0.0249	0.75	Q1: Core / Established	Q1: Emerging / Growth
Singh S.P.; Kemerer C.F.; Ramasubbu N.	Innovation in complex assembled electronic products: An analysis of the evolution of television components	2021	Journal of Operations Management	2	10.1002/joom.1139	https://www.scopus.com/inward/record.uri?eid=2-s2.0-85104966207&doi=10.1002%2fjoom.1139&partnerID=40&md5=3fd69ef6f491de0c4acb7a0ad4fb6b84	A complex assembled electronic product (CAEP), such as a modern television (TV), can be produced in a variety of design configurations using different combinations of software and hardware components that are arranged together in a hierarchy of technical subsystems within a defined product architecture. We examine the lifecycle of individual components that make up a CAEP to better understand why…	dominant design; durable electronic products; modularity; pleiotropy; product architecture; product life cycles; product management; technology adoption; technology innovation	Commerce; Product design; Statistical tests; Dominant design; Durable electronic product; Electronics products; Modularity; Pleiotropy; Product architecture; Product life cycles; Product management; Technology adoption; Technology innovation; Life cycle	Abernathy W.J., Utterback J.M., Patterns of industrial innovation, Technology Review, 80, 7, pp. 40-47, (1978); Alexy O., West J., Klapper H., Reitzig M., Surrendering control to gain advantage: Reconciling openness and the resource-based view of the firm, Strategic Management Journal, 39, 6, pp. 1704-1727, (2018); Andergassen R., Nardini F., Endogenous innovation waves and economic growth, Struc…		John Wiley and Sons Inc	10.4	Theme 2: china, investments, electric vehicle, electric vehicles	china, investments, electric vehicle, electric vehicles	Q1	2	462	0.2421	0.3314	47.0952	0.1576	0	0.5	0.4028	0.1343	6.843	0.9185	0.0957	0.3025	0.0068	0.0356	Q4: Emerging / Structural	Q4: Frontier / Niche
Klassen R.D.; Jacobs J.	Experimental comparison of Web, electronic and mail survey technologies in operations management	2001	Journal of Operations Management	163	10.1016/S0272-6963(01)00071-7	https://www.scopus.com/inward/record.uri?eid=2-s2.0-0035501379&doi=10.1016%2fS0272-6963%2801%2900071-7&partnerID=40&md5=08408b4b589e44ca1adb5c2f7c4a419b	With the growing acceptance of the Web (Internet) and electronic mail, it is no surprise that researchers are using an increasingly diverse set of survey technologies to gather data from managers. However, the effectiveness of these electronic technologies has not been rigorously assessed, especially for gathering data from establishment-level surveys (i.e. firm- or plant-level). To that end, a s…	Empirical research; End-user computing; Forecasting techniques; Survey design; Survey research methodology; World wide web (WWW)	Electronic mail; Facsimile; Forecasting; Personal computers; World Wide Web; Operations management; Operations research	Agarwal R., Prasad J., The role of innovation characteristics and perceived voluntariness in the acceptance of information technologies, Decision Sciences, 28, 3, pp. 557-582, (1997); Agarwal R., Prasad J., Are individual differences germane to the acceptance of new information technologies?, Decision Sciences, 30, 2, pp. 361-391, (1999); Armstrong J.S., Forecasting by extrapolation: Conclusions …			10.4	Theme 9: virtual reality, tourism, travel behavior, tourist destination	virtual reality, tourism, travel behavior, tourist destination	Q1	9	131	0.615	0.2999	73.1527	0.3852	0	0.5	0.4167	0.1389	4.9732	0.2504	0.1577	1	0.0208	0.5899	Q1: Core / Established	Q1: Emerging / Growth
Spencer A.J.; Buhalis D.; Moital M.	A hierarchical model of technology adoption for small owner-managed travel firms: An organizational decision-making and leadership perspective	2012	Tourism Management	97	10.1016/j.tourman.2011.11.011	https://www.scopus.com/inward/record.uri?eid=2-s2.0-84859871588&doi=10.1016%2fj.tourman.2011.11.011&partnerID=40&md5=fa8b1f54ac54bb7ee239a4d187216d05	This article assesses the diffusion of innovation theory and the technology acceptance model, and explores the factors influencing the decision to engage in technology adoption in small owner-managed travel firms. This is done through the use of the overarching theory of organisational decision-making to identify concepts and constructs which relate to the decision to adopt. The work aims to iden…	Decision-making; Diffusion; Leadership; Technology adoption	decision making; hierarchical system; innovation; leadership; organizational framework; technology adoption; tourism management; typology	Aguila-Obra A., Padilla-Melendez A., Organizational factors affecting Internet technology adoption, Internet Research, 16, 1, pp. 94-110, (2006); Anderson R., Reeb D., Founding family-ownership and firm performance from the S&P 500, Journal of Finance, 58, 3, pp. 1301-1327, (2003); Bagozzi R., Davis F., Warshaw P., Development and test of a theory of technological learning and usage, Human Relati…		Elsevier Ltd	12.4	Theme 9: virtual reality, tourism, travel behavior, tourist destination	virtual reality, tourism, travel behavior, tourist destination	Q1	9	131	0.615	0.2999	73.1527	0.3852	0	0.5	0.4167	0.1389	4.9732	0.2504	0.1577	1	0.0208	0.5899	Q1: Core / Established	Q1: Emerging / Growth
Line N.D.; Dogru T.; El-Manstrly D.; Buoye A.; Malthouse E.; Kandampully J.	Control, use and ownership of big data: A reciprocal view of customer big data value in the hospitality and tourism industry	2020	Tourism Management	58	10.1016/j.tourman.2020.104106	https://www.scopus.com/inward/record.uri?eid=2-s2.0-85081672917&doi=10.1016%2fj.tourman.2020.104106&partnerID=40&md5=6a3e37c644ca7bdb39ed7d2cbd6699d0	While the large-scale harvesting of consumer data is a common practice in the hospitality and tourism industries, the seemingly unassailable right of companies to collect and share consumer data is not without critics. The purpose of this paper is to explore the nature of data-based value co-creation under varying conditions of consumer control and benefits. Academic and press articles were used …	Big data; Blockchain; Data control; Reciprocal value; Value creation	consumption behavior; corporate strategy; data management; firm ownership; hospitality industry; technology adoption; tourism management	Arvidsson A., Brands: A critical perspective, Journal of Consumer Culture, 5, 2, pp. 235-258, (2005); Ballantyne D., Frow P., Varey R.J., Payne A., Value propositions as communication practice: Taking a wider view, Industrial Marketing Management, 40, 2, pp. 202-210, (2011); Ballantyne D., Varey R.J., Creating value-in-use through marketing interaction: The exchange logic of relating, communicati…		Elsevier Ltd	12.4	Theme 9: virtual reality, tourism, travel behavior, tourist destination	virtual reality, tourism, travel behavior, tourist destination	Q1	9	131	0.615	0.2999	73.1527	0.3852	0	0.5	0.4167	0.1389	4.9732	0.2504	0.1577	1	0.0208	0.5899	Q1: Core / Established	Q1: Emerging / Growth
Sun Y.-Y.; Lin P.-C.; Higham J.	Managing tourism emissions through optimizing the tourism demand mix: Concept and analysis	2020	Tourism Management	48	10.1016/j.tourman.2020.104161	https://www.scopus.com/inward/record.uri?eid=2-s2.0-85085880131&doi=10.1016%2fj.tourman.2020.104161&partnerID=40&md5=3148e7573e969c3c90a7635cffe048cd	Carbon mitigation strategies are an urgent and overdue tourism industry imperative. The tourism response to climate action has been to engage businesses in technology adoption, and to encourage more sustainable visitor behaviour. These strategies however are insufficient to mitigate the soaring carbon footprint of tourism. Building upon the concepts of optimization and eco-efficiency, we put forw…	Eco-efficiency; Goal programming; Market mix; Mitigation; Optimization; Tourism carbon emissions	business; technology adoption; tourism management; tourism market; tourist behavior; tourist destination	Battour M., Muslim travel behavior in Halal tourism, Mobilities, tourism and travel behavior: Contexts and boundaries, pp. 3-16, (2018); Becken S., Mackey B., What role for offsetting aviation greenhouse gas emissions in a deep-cut carbon world?, Journal of Air Transport Management, 63, pp. 71-83, (2017); Becken S., Shuker J., A framework to help destinations manage carbon risk from aviation emis…		Elsevier Ltd	12.4	Theme 9: virtual reality, tourism, travel behavior, tourist destination	virtual reality, tourism, travel behavior, tourist destination	Q1	9	131	0.615	0.2999	73.1527	0.3852	0	0.5	0.4167	0.1389	4.9732	0.2504	0.1577	1	0.0208	0.5899	Q1: Core / Established	Q1: Emerging / Growth
Bogicevic V.; Seo S.; Kandampully J.A.; Liu S.Q.; Rudd N.A.	Virtual reality presence as a preamble of tourism experience: The role of mental imagery	2019	Tourism Management	231	10.1016/j.tourman.2019.02.009	https://www.scopus.com/inward/record.uri?eid=2-s2.0-85062413964&doi=10.1016%2fj.tourman.2019.02.009&partnerID=40&md5=2deab7626d0f8aa5f4c94f18d02d2e1a	While the dominant research stream on tourism technologies has investigated the adoption of self-service, mobile, and web-based technologies, the potential of destination marketing through virtual technologies is yet to be fully investigated. Because of limited empirical knowledge about the application of virtual reality (VR) in tourism, this research investigates how VR can be used to deliver in…	Interactivity; Mental imagery; Presence; Tourism brand experience; Tourism marketing; VR	imagery; marketing; technology adoption; tourism market; tourist destination; virtual reality	Alsina-Jurnet I., Gutierrez-Maldonado J., Influence of personality and individual abilities on the sense of presence experienced in anxiety triggering virtual environments, International Journal of Human-Computer Studies, 68, 10, pp. 788-801, (2010); Animesh A., Pinsonneault A., Yang S.-B., Oh W., An odyssey into virtual worlds: Exploring the impacts of technological and spatial environments on i…		Elsevier Ltd	12.4	Theme 9: virtual reality, tourism, travel behavior, tourist destination	virtual reality, tourism, travel behavior, tourist destination	Q1	9	131	0.615	0.2999	73.1527	0.3852	0	0.5	0.4167	0.1389	4.9732	0.2504	0.1577	1	0.0208	0.5899	Q1: Core / Established	Q1: Emerging / Growth
Bec A.; Moyle B.; Timms K.; Schaffer V.; Skavronskaya L.; Little C.	Management of immersive heritage tourism experiencs: A conceptual model	2019	Tourism Management	159	10.1016/j.tourman.2018.10.033	https://www.scopus.com/inward/record.uri?eid=2-s2.0-85057088025&doi=10.1016%2fj.tourman.2018.10.033&partnerID=40&md5=5643ab2ee0a3848eb92cc7f2c69e6825	There is potential for immersive technology, such as augmented and virtual reality, to create memorable tourism experiences, specifically for heritage tourism. However, there is a lack of conceptual clarity surrounding the management of heritage for memorable tourism experiences. Subsequently, this research note proposes a four-stage conceptual model of heritage preservation for managing heritage…	Augmented reality; Cultural sustainability; Heritage preservation; Tourism experience; Virtual reality	conceptual framework; cultural heritage; heritage conservation; heritage tourism; research work; sustainability; technology adoption; tourism management; virtual reality	Azuma R., Baillot Y., Behringer R., Feiner S., Julier S., MacIntyre B., Recent advances in augmented reality, Los Alamitos: IEEE computer graphics and applications, 21, 6, pp. 34-47, (2001); Baciu C., Opre D., Riley S., A new way of thinking in the era of virtual reality and artificial intelligence, Educatia 21 Journal, 14, pp. 43-48, (2016); Bruno F., Bruno S., De Sensi G., Luchi M.L., Mancuso S…		Elsevier Ltd	12.4	Theme 9: virtual reality, tourism, travel behavior, tourist destination	virtual reality, tourism, travel behavior, tourist destination	Q1	9	131	0.615	0.2999	73.1527	0.3852	0	0.5	0.4167	0.1389	4.9732	0.2504	0.1577	1	0.0208	0.5899	Q1: Core / Established	Q1: Emerging / Growth
Dayour F.; Park S.; Kimbu A.N.	Backpackers’ perceived risks towards smartphone usage and risk reduction strategies: A mixed methods study	2019	Tourism Management	83	10.1016/j.tourman.2018.11.003	https://www.scopus.com/inward/record.uri?eid=2-s2.0-85056632077&doi=10.1016%2fj.tourman.2018.11.003&partnerID=40&md5=7a2bc750916df87c091f5814333d9e55	Backpackers’ travel ideology and experiences are increasingly being mediated by mobile phones (i.e. smartphones). This study explored their risk perceptions towards smartphone usage and consequent risk reduction strategies. Importantly, this paper proposes an integrated model of perceived risk combining technology and destination related risk factors. Employing a quantitative-dominant concurrent …	Backpackers; Mixed methods; Perceived risk; Risk reduction; Smartphones	Ghana; information technology; mobile communication; mobile phone; perception; risk assessment; risk factor; safety; technology adoption; tourist behavior; tourist destination; travel behavior	Adam I., Backpackers’ risk perceptions and risk reduction strategies in Ghana, Tourism Management, 49, pp. 99-108, (2015); Adam I., Adongo C.A., Do backpackers suffer crime? Empirical investigation of crime perpetrated against backpackers in Ghana, Journal of Hospitality and Tourism Management, 27, pp. 60-67, (2016); Agag G.M., El-Masry A.A., Why do customers trust online travel websites? Drivers…		Elsevier Ltd	12.4	Theme 9: virtual reality, tourism, travel behavior, tourist destination	virtual reality, tourism, travel behavior, tourist destination	Q1	9	131	0.615	0.2999	73.1527	0.3852	0	0.5	0.4167	0.1389	4.9732	0.2504	0.1577	1	0.0208	0.5899	Q1: Core / Established	Q1: Emerging / Growth
Vyas C.	Evaluating state tourism websites using Search Engine Optimization tools	2019	Tourism Management	50	10.1016/j.tourman.2019.01.019	https://www.scopus.com/inward/record.uri?eid=2-s2.0-85060489041&doi=10.1016%2fj.tourman.2019.01.019&partnerID=40&md5=1f1a3df6468a48a9b0c9efc6b5d6bc4e	Applying Search Engine Optimization (SEO) tools such as TrafficEstimate and Twitter Search, Google Trends, Alexa, SimilarWeb, SEMRUSH, SEO Analyzer, and Moz-Open Site Explorer; this research comparatively evaluates tourism websites of the government of India and of five Indian states. The criteria for selecting state websites are the number of Foreign Tourists Arrival (FTA). Using each SEO tool, …	DMO; India; SEO; Tourism; Websites	India; Alexa; comparative study; information and communication technology; Internet; optimization; research work; technology adoption; tourism market	Aggarwal A.K., Guglani M., Goel R.K., Spiritual & yoga tourism: A case study on experience of foreign tourists visiting rishikesh, (2008); Bhaidkar A., Goswami A., Medical tourism in India and the Health policy of the NDA government: An overview, Aweshkar Research Journal, 22, 1, (2017); Bhattacharya K., Role of rules of thumb in forecasting foreign tourist arrival: A case study of India, (2011);…		Elsevier Ltd	12.4	Theme 9: virtual reality, tourism, travel behavior, tourist destination	virtual reality, tourism, travel behavior, tourist destination	Q1	9	131	0.615	0.2999	73.1527	0.3852	0	0.5	0.4167	0.1389	4.9732	0.2504	0.1577	1	0.0208	0.5899	Q1: Core / Established	Q1: Emerging / Growth
So K.K.F.; Oh H.; Min S.	Motivations and constraints of Airbnb consumers: Findings from a mixed-methods approach	2018	Tourism Management	316	10.1016/j.tourman.2018.01.009	https://www.scopus.com/inward/record.uri?eid=2-s2.0-85044371293&doi=10.1016%2fj.tourman.2018.01.009&partnerID=40&md5=5c0e3f5c74ddd7ca860e4161a562c21f	Airbnb is widely recognized as a disruptive innovation in the tourism industry. While separate studies have examined various factors affecting consumers' adoption of Airbnb, the literature has largely focused on a handful of factors in isolation. Adopting a sequential mixed-methods approach, this study proposes a comprehensive conceptual model integrating the literature and findings of a qualitat…	Airbnb; Constraints; Hotel; Motivations; Sharing economy; Tourism	consumption behavior; hotel industry; innovation; Internet; public attitude; survey method; technology adoption; tourism market	Airbnb, Airbnb and the rise of millennial travel, (2016); Ajzen I., From intentions to actions: A theory of planned behavior, Action control, pp. 11-39, (1985); Ajzen I., The theory of planned behavior, Organizational Behavior and Human Decision Processes, 50, 2, pp. 179-211, (1991); Armstrong J.S., Overton T.S., Estimating nonresponse bias in mail surveys, Journal of Marketing Research, 14, 3, p…		Elsevier Ltd	12.4	Theme 9: virtual reality, tourism, travel behavior, tourist destination	virtual reality, tourism, travel behavior, tourist destination	Q1	9	131	0.615	0.2999	73.1527	0.3852	0	0.5	0.4167	0.1389	4.9732	0.2504	0.1577	1	0.0208	0.5899	Q1: Core / Established	Q1: Emerging / Growth
Ma E.; Yang H.; Wang Y.-C.; Song H.	Building restaurant customers’ technology readiness through robot-assisted experiences at multiple product levels	2022	Tourism Management	9	10.1016/j.tourman.2022.104610	https://www.scopus.com/inward/record.uri?eid=2-s2.0-85132786794&doi=10.1016%2fj.tourman.2022.104610&partnerID=40&md5=1100eb102c7a108e91f7b9b6355c2d4d	The growing popularity of robot-related research contexts in hospitality and tourism calls for in-depth analysis of how different product/service designs strategies integrating robots may influence customers' experiences. Employing a scenario-based 2 × 2 × 2 experimental research design, this study assesses service robots applied at three different product/service levels (i.e., core, facilitating…	Experience economy; Product level; Robotic restaurants; Service robots; Technology readiness	design; hospitality industry; robotics; service quality; technology adoption; tourism economics	Axelsen M., Swan T., Designing festival experiences to influence visitor perceptions: The case of a wine and food festival, Journal of Travel Research, 49, 4, pp. 436-450, (2010); Bandoim L., Country garden opens restaurant operated completely by robots, (2020); Business Insights F., Service robotics market size, share & Covid-19 impact analysis, (2021); Byrd K., Fan A., Her E., Liu Y., Almanza B…		Elsevier Ltd	12.4	Theme 9: virtual reality, tourism, travel behavior, tourist destination	virtual reality, tourism, travel behavior, tourist destination	Q1	9	131	0.615	0.2999	73.1527	0.3852	0	0.5	0.4167	0.1389	4.9732	0.2504	0.1577	1	0.0208	0.5899	Q1: Core / Established	Q1: Emerging / Growth
Gafter L.M.; Tchetchik A.	The role of social ties and communication technologies in visiting friends tourism- A GMM simultaneous equations approach	2017	Tourism Management	16	10.1016/j.tourman.2017.02.024	https://www.scopus.com/inward/record.uri?eid=2-s2.0-85014492048&doi=10.1016%2fj.tourman.2017.02.024&partnerID=40&md5=c0494cb6be975044154d1df3b5234b91	This study has two objectives: to examine the interplay between communication technologies, social ties, attractiveness of destination and distance, focusing on the visiting friends tourism; and to further distinguish the visiting friends sub-segment from the visiting relatives’ one. We pursue a quantitative approach by analyzing survey data among 300 respondents who maintain connections with fri…	Communication technologies; GMM; Social networks; Visiting friends and relatives	future prospect; information and communication technology; research work; social network; technology adoption; tourism; tourist attraction; tourist destination	Arguin P.M., A definition that includes first and second generation immigrants returning to their countries of origin to visit friends and relatives still makes sense to me, Journal of Travel Medicine, 17, 3, pp. 147-149, (2010); Asiedu A.B., Participants’ characteristics and economic benefits of visiting friends and relatives (VFR) tourism—an international survey of the literature with implicati…		Elsevier Ltd	12.4	Theme 9: virtual reality, tourism, travel behavior, tourist destination	virtual reality, tourism, travel behavior, tourist destination	Q1	9	131	0.615	0.2999	73.1527	0.3852	0	0.5	0.4167	0.1389	4.9732	0.2504	0.1577	1	0.0208	0.5899	Q1: Core / Established	Q1: Emerging / Growth
Wang Y.-S.; Li H.-T.; Li C.-R.; Zhang D.-Z.	Factors affecting hotels' adoption of mobile reservation systems: A technology-organization-environment framework	2016	Tourism Management	230	10.1016/j.tourman.2015.09.021	https://www.scopus.com/inward/record.uri?eid=2-s2.0-84944681217&doi=10.1016%2fj.tourman.2015.09.021&partnerID=40&md5=036ff6deca6e68ad65ffe44a0ee32971	This study explores why hotels adopt mobile reservation systems; based on a technology-organization-environment (TOE) framework, nine factors are hypothesized to explain hotels' adoption of mobile hotel reservation systems (MHRS). Logistic regression is employed to analyze data gathered from 140 hotels in Taiwan. The results indicate that compatibility, firm size, technology competence, and criti…	Hospitality industry; Mobile hotel reservation systems; Mobile service adoption; Technology-organization-environment (TOE) framework	Taiwan; firm size; mobile communication; organizational framework; service provision; service sector; technology adoption	Abrahamson E., Rosenkopf L., Institutional and competitive bandwagons: using mathematical modeling as a tool to explore innovation diffusion, Academy of Management Review, 18, 3, pp. 487-517, (1993); Ajzen I., The theory of planned behavior, Organizational Behavior and Human Decision Processes, 50, 2, pp. 179-211, (1991); Barnes S.J., Bohringer M., Modeling use continuance behavior in microbloggi…		Elsevier Ltd	12.4	Theme 9: virtual reality, tourism, travel behavior, tourist destination	virtual reality, tourism, travel behavior, tourist destination	Q1	9	131	0.615	0.2999	73.1527	0.3852	0	0.5	0.4167	0.1389	4.9732	0.2504	0.1577	1	0.0208	0.5899	Q1: Core / Established	Q1: Emerging / Growth
Salavati S.; Hashim N.H.	Website adoption and performance by Iranian hotels	2015	Tourism Management	33	10.1016/j.tourman.2014.07.017	https://www.scopus.com/inward/record.uri?eid=2-s2.0-84907066918&doi=10.1016%2fj.tourman.2014.07.017&partnerID=40&md5=ec068058e8ebf8017c85393feb99dd28	This study investigates the website adoption and performance of Iranian hotels. Using the content analysis technique, this study identifies 48 different features of the websites of 75 Iranian hotels. The findings show that Iranian hotels are at a very early stage of Internet adoption. The use of e-commerce is unlikely in the near future, as at present, none of the hotels offers online reservation…	E-tourism; Hotels; Iran; Page rank; Website evaluation	Iran; electronic commerce; tourism management; tourist destination; World Wide Web; Internet; technology adoption; tourism development	Agichtein E., Brill E., Dumais S., Improving web search ranking by incorporating user behavior information, (2006); Au Yeung T., Law R., Evaluation of usability: a study of hotel websites in Hong Kong, Journal of Hospitality and Tourism Research, 30, 4, pp. 452-473, (2006); Azizi Jalilian M., Danehkar A., Shaban Ali Fami H., Determination of indicators and standards for tourism impacts in protect…		Elsevier Ltd	12.4	Theme 9: virtual reality, tourism, travel behavior, tourist destination	virtual reality, tourism, travel behavior, tourist destination	Q1	9	131	0.615	0.2999	73.1527	0.3852	0	0.5	0.4167	0.1389	4.9732	0.2504	0.1577	1	0.0208	0.5899	Q1: Core / Established	Q1: Emerging / Growth
Smith W.W.; Li X.R.; Pan B.; Witte M.; Doherty S.T.	Tracking destination image across the trip experience with smartphone technology	2015	Tourism Management	90	10.1016/j.tourman.2014.04.010	https://www.scopus.com/inward/record.uri?eid=2-s2.0-84911897954&doi=10.1016%2fj.tourman.2014.04.010&partnerID=40&md5=b0beef406817659358ee8f7ca639fd18	The purpose of this study is to examine changes to tourists' image of a destination throughout a trip experience. Using Blackberry technology, a group of Canadian student travelers to Peru were asked to record images and experience about their trip during several key moments (pre-trip, upon arrival, half-way, departure, and post-trip). The results of this mixed methods study indicate that tourist…	Image; Mixed methods; Photo elicitation; Repeated measures; Smartphone	Peru; cognition; mobile communication; technology adoption; tourist destination; travel behavior	Alcaniz E.B., Garcia I.S., Blas S.S., The functional-psychological continuum in the cognitive image of a destination: a confirmatory analysis, Tourism Management, 30, 5, pp. 715-723, (2009); Baloglu S., Brinberg D., Affective images of tourism destinations, Journal of Travel Research, 35, 4, pp. 11-15, (1997); Baloglu S., McCleary K.W., Amodel of destination image formation, Annals of Tourism Res…		Elsevier Ltd	12.4	Theme 9: virtual reality, tourism, travel behavior, tourist destination	virtual reality, tourism, travel behavior, tourist destination	Q1	9	131	0.615	0.2999	73.1527	0.3852	0	0.5	0.4167	0.1389	4.9732	0.2504	0.1577	1	0.0208	0.5899	Q1: Core / Established	Q1: Emerging / Growth
Fong L.H.N.; Lam L.W.; Law R.	How locus of control shapes intention to reuse mobile apps for making hotel reservations: Evidence from chinese consumers	2017	Tourism Management	131	10.1016/j.tourman.2017.03.002	https://www.scopus.com/inward/record.uri?eid=2-s2.0-85014397754&doi=10.1016%2fj.tourman.2017.03.002&partnerID=40&md5=67fd8cdb24cb1a5b56fe696158babc11	This study unveils the cognitive mechanism that locus of control (LOC) dimensions (internal control, chance control, and control by powerful others) predict intention to reuse mobile apps for making hotel reservations. The predictions are assumed through the unified theory of acceptance and use of technology (UTAUT) anchors and perceived risk. Drawn from an online survey with 457 Chinese particip…	Control; Hotel; PLS-SEM; Risk; Smartphone; Technology acceptance; Tourism; UTAUT	hotel industry; mobile phone; risk factor; survey; technology adoption; tourism	Amaro S., Duarte P., An integrative model of consumers' intentions to purchase travel online, Tourism Management, 46, pp. 64-79, (2015); Blagrove M., Hartnell S.J., Lucid dreaming: Associations with internal locus of control, need for cognition and creativity, Personality and Individual Differences, 28, 1, pp. 41-47, (2000); Burroughs J.E., Glen Mick D., Exploring antecedents and consequences of …		Elsevier Ltd	12.4	Theme 9: virtual reality, tourism, travel behavior, tourist destination	virtual reality, tourism, travel behavior, tourist destination	Q1	9	131	0.615	0.2999	73.1527	0.3852	0	0.5	0.4167	0.1389	4.9732	0.2504	0.1577	1	0.0208	0.5899	Q1: Core / Established	Q1: Emerging / Growth
García-Milon A.; Olarte-Pascual C.; Juaneda-Ayensa E.	Assessing the moderating effect of COVID-19 on intention to use smartphones on the tourist shopping journey	2021	Tourism Management	39	10.1016/j.tourman.2021.104361	https://www.scopus.com/inward/record.uri?eid=2-s2.0-85108060050&doi=10.1016%2fj.tourman.2021.104361&partnerID=40&md5=c345c987f9780dced77f0c31ccb70f5b	This work proposes the first model to examine the moderating effect of the COVID-19 syndemic on the acceptance and use of smartphones during the tourist shopping journey. The model was tested with 1800 tourists, 900 non-COVID-19 (i.e. prior to COVID-19) and 900 during the COVID-19 period. The results showed that: 1) the model has better fit for the COVID-19 period as its explanatory capacity for …	COVID-19; Effort expectancy; Moderating effect; Performance expectancy; Smartphone; Social influence; Technology acceptance models; Tourist shopping journey	COVID-19; mobile phone; shopping activity; tourist behavior	Ajzen I., The theory of planned behavior, Organizational Behavior and Human Decision Processes, 50, 2, pp. 179-211, (1991); Alalwan A.A., Dwivedi Y.K., Rana N.P., Factors influencing adoption of mobile banking by Jordanian bank customers: Extending UTAUT2 with trust, International Journal of Information Management, 37, 3, pp. 99-110, (2017); Armstrong J.S., Overton T.S., Estimating nonresponse bi…		Elsevier Ltd	12.4	Theme 10: retailing, mobile phone, shopping activity, social influence	retailing, mobile phone, shopping activity, social influence	Q1	10	90	0.5901	0.2244	68.1556	0.3416	0	0.5	0.0526	0.0175	4.2725	0	0.1463	0.8713	0.0249	0.75	Q1: Core / Established	Q1: Emerging / Growth
Amaro S.; Duarte P.	An integrative model of consumers' intentions to purchase travel online	2015	Tourism Management	381	10.1016/j.tourman.2014.06.006	https://www.scopus.com/inward/record.uri?eid=2-s2.0-84904111683&doi=10.1016%2fj.tourman.2014.06.006&partnerID=40&md5=23626ea5d6b969e723de7b9a7a2174d3	Grounded in the Theory of Reasoned Action, the Theory of Planned Behaviour, the Technology Acceptance Model and on the Innovation Diffusions Theory, this study proposes and empirically tests an integrated model to explore which factors affect intentions to purchase travel online. Partial Least Squares Structural Equation Modelling was conducted to assess the hypotheses. The empirical results, obt…	Innovations Diffusion Theory; Intentions to Purchase; Online Travel Shopping; Social Media; Technology Acceptance Model; Theory of Planned Behaviour; Theory of Reasoned Action	consumption behavior; electronic commerce; social network; travel behavior; World Wide Web; economic analysis; empirical analysis; hypothesis testing; integrated approach; Internet; least squares method; media role; model test; research work; theoretical study; tourism	Ajzen I., From intentions to actions: a theory of planned behavior, Action-control: From cognition to behavior, pp. 11-39, (1985); Ajzen I., The theory of planned behavior, Organizational Behavior and Human Decision Processes, 50, 2, pp. 179-211, (1991); Ajzen I., Perceived behavioral control, self-efficacy, locus of control, and the theory of planned behavior, Journal of Applied Social Psycholog…		Elsevier Ltd	12.4	Theme 8: social media, social networking (online), knowledge, psychology	social media, social networking (online), knowledge, psychology	Q1	8	112	0.5845	0.1818	113.589	0.7384	0	0.5	0.2083	0.0694	5.2199	0.3385	0.096	0.3056	0.0183	0.4931	Q1: Core / Established	Q2: Mature / Potential
Huang Y.-C.; Backman S.J.; Backman K.F.; Moore D.	Exploring user acceptance of 3D virtual worlds in travel and tourism marketing	2013	Tourism Management	228	10.1016/j.tourman.2012.09.009	https://www.scopus.com/inward/record.uri?eid=2-s2.0-84906701084&doi=10.1016%2fj.tourman.2012.09.009&partnerID=40&md5=75aa28ee3dab7d959e067431b29021ef	The virtual world of Second Life provides opportunities for companies in communicating marketing messages to targeted markets and capturing the attention of potential customers. Second Life has also been used by the travel and tourism industry as a collaborative and commercial tool for communicating with travelers in marketing tourism destinations (e.g. Tourism Ireland) as well as business manage…	3D virtual worlds; Behavioral intentions; Hedonic constructs; Technology Acceptance Model; Virtual tourist experience	marketing; tourism management; tourist behavior; tourist destination; virtual reality	Ajzen I., Driver B.L., Application of the theory of planned behavior to leisure choice, Journal of Leisure Research, 24, 3, pp. 207-224, (1992); Anderson J.C., Gerbing D.W., Structural equation modeling in practice - a review and recommended 2-step approach, Psychological Bulletin, 103, 3, pp. 411-423, (1988); Arnold M.J., Reynolds K.E., Hedonic shopping motivations, Journal of Retailing, 79, 2, …		Elsevier Ltd	12.4	Theme 9: virtual reality, tourism, travel behavior, tourist destination	virtual reality, tourism, travel behavior, tourist destination	Q1	9	131	0.615	0.2999	73.1527	0.3852	0	0.5	0.4167	0.1389	4.9732	0.2504	0.1577	1	0.0208	0.5899	Q1: Core / Established	Q1: Emerging / Growth
Ayeh J.K.; Au N.; Law R.	Predicting the intention to use consumer-generated media for travel planning	2013	Tourism Management	346	10.1016/j.tourman.2012.06.010	https://www.scopus.com/inward/record.uri?eid=2-s2.0-84869878962&doi=10.1016%2fj.tourman.2012.06.010&partnerID=40&md5=3548271672e0e1ab914fc1cc6da441b2	Despite the growing enthusiasm about social media, empirical research findings suggest that the majority of Internet users are not using consumer-generated media (CGM) for travel planning. Yet little is presently known about the relevant factors determining CGM usage for the specific purpose of travel planning. Using an online survey of travel consumers, this study investigates the intention to u…	Enjoyment; Partial Least Squares (PLS); Similarity of interest; Social media; Technology acceptance model; Travelers; User-generated content	consumption behavior; Internet; least squares method; media role; modeling; planning system; survey method	Ajzen I., Attitude structure and behavior, Attitude structure and function, pp. 241-274, (1989); Ajzen I., The theory of planned behaviour, Organizational Behaviour and Human Decision Processes, 50, pp. 179-211, (1991); Ajzen I., Fishbein M., Understanding attitudes and predicting social behavior, (1980); Arsal I., Backman S., Baldwin E., Influence of an online travel community on travel decision…		Elsevier Ltd	12.4	Theme 8: social media, social networking (online), knowledge, psychology	social media, social networking (online), knowledge, psychology	Q1	8	112	0.5845	0.1818	113.589	0.7384	0	0.5	0.2083	0.0694	5.2199	0.3385	0.096	0.3056	0.0183	0.4931	Q1: Core / Established	Q2: Mature / Potential
El-Gohary H.	Factors affecting E-Marketing adoption and implementation in tourism firms: An empirical investigation of Egyptian small tourism organisations	2012	Tourism Management	198	10.1016/j.tourman.2011.10.013	https://www.scopus.com/inward/record.uri?eid=2-s2.0-84859843975&doi=10.1016%2fj.tourman.2011.10.013&partnerID=40&md5=54bf35ed07b54d544b4fb0b59af5f51d	This study aims to analyze the different factors affecting the adoption of Electronic Marketing (E-Marketing) by Egyptian small tourism organizations. The study validates a conceptual framework extending TAM and IDT models to explain E-marketing adoption utilising a quantitative approach, in which data is collected based on survey strategy through questionnaires to address different levels of the…	E-Marketing adoption; Egypt; Electronic Marketing; Small tourism organizations; Technology Acceptance Model (TAM) and Innovation Diffusion Theory (IDT)	Egypt; adoption constraint; conceptual framework; empirical analysis; implementation process; marketing; quantitative analysis; questionnaire survey; tourism economics; tourism management	Aaker D.A., Day G.S., The perils of high-growth markets, Strategic Management Journal, 7, 5, pp. 409-421, (1986); Abbasi M.S., Chandio F.H., Soomro A.F., Shah F., Social influence, voluntariness, experience and the Internet acceptance: an extension of technology acceptance model within a south-Asian country context, Journal of Enterprise Information Management, 24, 1, pp. 30-52, (2011); Abdelhame…		Elsevier Ltd	12.4	Theme 9: virtual reality, tourism, travel behavior, tourist destination	virtual reality, tourism, travel behavior, tourist destination	Q1	9	131	0.615	0.2999	73.1527	0.3852	0	0.5	0.4167	0.1389	4.9732	0.2504	0.1577	1	0.0208	0.5899	Q1: Core / Established	Q1: Emerging / Growth
Guttentag D.A.	Virtual reality: Applications and implications for tourism	2010	Tourism Management	876	10.1016/j.tourman.2009.07.003	https://www.scopus.com/inward/record.uri?eid=2-s2.0-77952322763&doi=10.1016%2fj.tourman.2009.07.003&partnerID=40&md5=549832b421e4e0372f901058a2f0ca35	Virtual reality (VR) offers tourism many useful applications that deserve greater attention from tourism researchers and professionals. As VR technology continues to evolve, the number and significance of such applications undoubtedly will increase. Planning and management, marketing, entertainment, education, accessibility, and heritage preservation are six areas of tourism in which VR may prove…	Authenticity; Heritage; Management; Marketing; Motivation; Planning; Virtual reality	heritage conservation; marketing; technology adoption; tourism management; virtual reality	Addison A.C., Emerging trends in virtual heritage, IEEE Multimedia, 7, 2, pp. 22-25, (2000); Addison A.C., The vanishing virtual: safeguarding heritage's endangered digital record, New heritage: New media and cultural heritage, pp. 27-39, (2007); Agence France-Presse Paralysed man takes a walk in virtual world, AFP, (2008); Al-Kodmany K., Visualization tools and methods in community planning: fro…		Elsevier Ltd	12.4	Theme 9: virtual reality, tourism, travel behavior, tourist destination	virtual reality, tourism, travel behavior, tourist destination	Q1	9	131	0.615	0.2999	73.1527	0.3852	0	0.5	0.4167	0.1389	4.9732	0.2504	0.1577	1	0.0208	0.5899	Q1: Core / Established	Q1: Emerging / Growth
Casaló L.V.; Flavián C.; Guinalíu M.	Determinants of the intention to participate in firm-hosted online travel communities and effects on consumer behavioral intentions	2010	Tourism Management	350	10.1016/j.tourman.2010.04.007	https://www.scopus.com/inward/record.uri?eid=2-s2.0-77955418517&doi=10.1016%2fj.tourman.2010.04.007&partnerID=40&md5=f89c0414da668ec91edc6b2fa49fa7d0	The increasing presence of firm-hosted online travel communities is motivating significant changes in the travel industry. This study attempts to explain consumers' intentions to participate in such communities, and other consumer behavioral intentions, on the basis of a model that integrates the Theory of Planned Behavior, the Technology Acceptance Model, and Social Identity Theory. In addition,…	Consumer behavioral intentions; Identification; Online travel communities; Participation; TAM; TPB	consumption behavior; leisure industry; participatory approach; travel behavior; World Wide Web	Audiencia en Internet según el EGM, febrero/marzo de 2009, (2009); Ajzen I., The theory of planned behavior, Organizational Behavior and Human Decision Process, 50, pp. 179-211, (1991); Ajzen I., Driver B.L., Application of the theory of planned behavior to leisure choice, Journal of Leisure Research, 24, 3, pp. 207-224, (1992); Akkinen M., Conceptual foundations of online communities, (2005); Al…		Elsevier Ltd	12.4	Theme 9: virtual reality, tourism, travel behavior, tourist destination	virtual reality, tourism, travel behavior, tourist destination	Q1	9	131	0.615	0.2999	73.1527	0.3852	0	0.5	0.4167	0.1389	4.9732	0.2504	0.1577	1	0.0208	0.5899	Q1: Core / Established	Q1: Emerging / Growth
Kim H.-b.; Kim T.(T.); Shin S.W.	Modeling roles of subjective norms and eTrust in customers' acceptance of airline B2C eCommerce websites	2009	Tourism Management	291	10.1016/j.tourman.2008.07.001	https://www.scopus.com/inward/record.uri?eid=2-s2.0-58649103944&doi=10.1016%2fj.tourman.2008.07.001&partnerID=40&md5=13619b39d44c94cfdb3b43d4c03333c6	Airline companies have increasingly employed electronic commerce (eCommerce) for strategic purposes, most notably in order to achieve long-term competitive advantage and global competitiveness by enhancing customer satisfaction as well as marketing efficacy and managerial efficiency. eCommerce has now emerged as possibly the most representative distribution channel in the airline industry. In thi…	Airline business-to-customer electronic commerce websites (AB2CEWS); Airline marketing; Electronic trust (eTrust); Internet marketing; South Korea; Subjective norms; Technology acceptance model (TAM)	Asia; Eurasia; Far East; Korea; South Korea; airline industry; e-commerce; Internet; marketing; modeling; strategic approach	Adams D., Nelson R.R., Todd P.A., Perceived usefulness, ease of use, and usage of information technology: a replications, MIS Quarterly, 16, 2, pp. 227-247, (1992); Agarwal R., Prasad J., The roles of innovation characteristics and perceived voluntariness in the acceptance of information technologies, Decision Sciences, 28, 3, pp. 557-582, (1997); Ajzen I., The theory of planned behavior, Organiz…		Elsevier Ltd	12.4	Theme 2: china, investments, electric vehicle, electric vehicles	china, investments, electric vehicle, electric vehicles	Q1	2	462	0.2421	0.3314	47.0952	0.1576	0	0.5	0.4028	0.1343	6.843	0.9185	0.0957	0.3025	0.0068	0.0356	Q4: Emerging / Structural	Q4: Frontier / Niche
Brown K.G.; Charlier S.D.	An integrative model of e-learning use: Leveraging theory to understand and increase usage	2013	Human Resource Management Review	39	10.1016/j.hrmr.2012.06.004	https://www.scopus.com/inward/record.uri?eid=2-s2.0-84871936301&doi=10.1016%2fj.hrmr.2012.06.004&partnerID=40&md5=8d49786b88aac05d069dba99c52a9fb2	Employees are increasingly using technology to access content for learning, and theory development has been outpaced by practice. Drawing on a well validated theory of behavior change (the Transtheoretical Model of Change), as well as theories on technology acceptance and employee development, this paper offers an integrative model of factors that influence employee use of e-learning as well as p…	E-HR; E-Learning; Employee development; Technology Acceptance Model; Training; Transtheoretical Model of Change		Adams J., White M., Why don't stage-based activity promotion interventions work?, Health Education Research, 20, 2, pp. 237-243, (2005); Allen M., Bourhis J., Mabry E., Burrell N.A., Timmerman C.E., Comparing distance education to face-to-face methods of education, Classroom communication and instructional processes: Advances through meta-analysis, pp. 229-244, (2006); Bagozzi R., The legacy of t…			13	Theme 6: engineering education, agriculture, agricultural technology, learning	engineering education, agriculture, agricultural technology, learning	Q1	6	40	0.5182	0.4089	29.05	0	0	0.5	0.25	0.0833	4.5398	0.0955	0.1522	0.9384	0.0312	1	Q1: Core / Established	Q1: Emerging / Growth
Sohn S.	A contextual perspective on consumers' perceived usefulness: The case of mobile online shopping	2017	Journal of Retailing and Consumer Services	73	10.1016/j.jretconser.2017.05.002	https://www.scopus.com/inward/record.uri?eid=2-s2.0-85019861532&doi=10.1016%2fj.jretconser.2017.05.002&partnerID=40&md5=2e39093eebb99568fd8c7fa76f06bc73	This research aims to study the origins of consumers' usefulness perceptions through the example of mobile online shopping adoption in Europe. The results of an empirical study, which is grounded in technology acceptance theory, reveal the pivotal role of consumers' beliefs about the quality of mobile online stores in the formation of usefulness perceptions prior to adoption. While this study ide…	Mobile commerce; Mobile online shopping touchpoints; Perceived usefulness	Europe; consumption behavior; electronic commerce; Internet; perception; shopping activity; technology adoption	Abbas H.A., Hamdy H.I., Determinants of continuance intention factor in Kuwait communication market: case study of Zain-Kuwait, Comput. Human. Behav., 49, pp. 648-657, (2015); Agrebi S., Jallais J., Explain the intention to use smartphones for mobile shopping, J. Retail. Consum. Serv., 22, pp. 16-23, (2015); Al-Qeisi K., Dennis C., Alamanos E., Jayawardhena C., Website design quality and usage be…		Elsevier Ltd	13.1	Theme 2: china, investments, electric vehicle, electric vehicles	china, investments, electric vehicle, electric vehicles	Q1	2	462	0.2421	0.3314	47.0952	0.1576	0	0.5	0.4028	0.1343	6.843	0.9185	0.0957	0.3025	0.0068	0.0356	Q4: Emerging / Structural	Q4: Frontier / Niche
Park H.; Lim R.E.	Fashion and the metaverse: Clarifying the domain and establishing a research agenda	2023	Journal of Retailing and Consumer Services	14	10.1016/j.jretconser.2023.103413	https://www.scopus.com/inward/record.uri?eid=2-s2.0-85153962149&doi=10.1016%2fj.jretconser.2023.103413&partnerID=40&md5=4789655d9f3d34dc8d32aac15c90a97c	In recent years, the metaverse has garnered significant attention as a term referring to a network of 3D virtual worlds that integrate elements of both physical and digital worlds. Fashion brands have begun exploring the metaverse as a new marketing platform, which is expected to bring about substantial changes in the fashion and retail industry. However, a lack of consensus on the nature of the …	Avatars; Brand equity; Brand experience; Fashion branding strategies; Gaming platforms; Immersive technologies; Metaverse; NFTs; Virtual branded worlds	empirical analysis; marketing; research work; technology adoption; theoretical study; typology; virtual reality	Aaker D.A., The value of brand equity, J. Bus. Strat., 13, 4, pp. 27-32, (1992); Agarwal R., Mehrotra A., Misra D., Customer happiness as a function of perceived loyalty program benefits-A quantile regression approach, J. Retailing Consum. Serv., 64, (2022); Ahn S.J., Kim J., Kim J., The bifold triadic relationships framework: a theoretical primer for advertising research in the metaverse, J. Adv…		Elsevier Ltd	13.1	Theme 9: virtual reality, tourism, travel behavior, tourist destination	virtual reality, tourism, travel behavior, tourist destination	Q1	9	131	0.615	0.2999	73.1527	0.3852	0	0.5	0.4167	0.1389	4.9732	0.2504	0.1577	1	0.0208	0.5899	Q1: Core / Established	Q1: Emerging / Growth
Liu C.-H.; Dong T.-P.; Vu H.T.	Transformed virtual concepts into reality: Linkage the viewpoint of entrepreneurial passion, technology adoption propensity and advantage to usage intention	2023	Journal of Retailing and Consumer Services	1	10.1016/j.jretconser.2023.103452	https://www.scopus.com/inward/record.uri?eid=2-s2.0-85162871767&doi=10.1016%2fj.jretconser.2023.103452&partnerID=40&md5=8af37b61ee999aa52329f0d32633e684	The hospitality industry has experienced changes in communication and interaction due to the evolution of new technology. However, there has been limited research on the relationship between entrepreneurial passion, technology adoption propensity (TAP), perception of advantage, and non-fungible token (NFT) usage intention. Despite the challenges in data collection and limited NFT applications, th…	Attitudes; Entrepreneurial passion; Image; NFT; Perception of advantage; TAP	entrepreneur; hospitality industry; model; perception; technology adoption; virtual reality	Abdelhakim A.S., Abou-Shouk M., Ab Rahman N.A.F.W., Farooq A., The fast-food employees' usage intention of robots: a cross-cultural study, Tourism Manag. Perspect., 45, (2023); Abou-Shouk M., Gad H.E., Abdelhakim A., Exploring customers' attitudes to the adoption of robots in tourism and hospitality, Journal of Hospitality and Tourism Technology, 12, 4, pp. 762-776, (2021); Ajzen I., The theory o…		Elsevier Ltd	13.1	Theme 9: virtual reality, tourism, travel behavior, tourist destination	virtual reality, tourism, travel behavior, tourist destination	Q1	9	131	0.615	0.2999	73.1527	0.3852	0	0.5	0.4167	0.1389	4.9732	0.2504	0.1577	1	0.0208	0.5899	Q1: Core / Established	Q1: Emerging / Growth
Yuen K.F.; Chua J.Y.; Li X.; Wang X.	The determinants of users’ intention to adopt telehealth: Health belief, perceived value and self-determination perspectives	2023	Journal of Retailing and Consumer Services	3	10.1016/j.jretconser.2023.103346	https://www.scopus.com/inward/record.uri?eid=2-s2.0-85152647628&doi=10.1016%2fj.jretconser.2023.103346&partnerID=40&md5=57351c4f1007e07276758ce79457597f	Telehealth is an effective and promising mode of healthcare delivery. It is crucial for society to understand the determinants of user adoption of telehealth to realize its benefits. This research investigates and analyzes the factors that impact the adoption of telehealth services from the users' perspective. The study integrates three theoretical frameworks, namely, Health Belief Model, Perceiv…	Adoption behavior; Determinants; Health belief model; Perceived value theory; Self-determination theory; Telehealth	Singapore [Southeast Asia]; health care; health monitoring; health services; information and communication technology; media role; perception; policy making; technology adoption; theoretical study	Adams N., Little T.D., Ryan R.M., Self-determination theory, Development of Self-Determination through the Life-Course, pp. 47-54, (2017); Ahn J., Kwon J., Green hotel brands in Malaysia: perceived value, cost, anticipated emotion, and revisit intention, Curr. Issues Tourism, 23, 12, pp. 1559-1574, (2020); Alsyouf A., Lutfi A., Alsubahi N., Alhazmi F.N., Al-Mugheed K., Anshasi R.J., Alharbi N.I.,…		Elsevier Ltd	13.1	Theme 5: health care, mhealth, india, internet of things	health care, mhealth, india, internet of things	Q1	5	136	0.2703	0.3017	47.4706	0.1609	0	0.5	0.6316	0.2105	5.3761	0.3943	0.0957	0.3027	0.015	0.3605	Q3: Niche / Transient	Q4: Frontier / Niche
Kamoonpuri S.Z.; Sengar A.	Hi, May AI help you? An analysis of the barriers impeding the implementation and use of artificial intelligence-enabled virtual assistants in retail	2023	Journal of Retailing and Consumer Services	19	10.1016/j.jretconser.2023.103258	https://www.scopus.com/inward/record.uri?eid=2-s2.0-85146013161&doi=10.1016%2fj.jretconser.2023.103258&partnerID=40&md5=9f69ce4d71a26928edb0b708132705db	Artificial Intelligence enabled Virtual Assistants (VAs) are evolving rapidly, offering promising opportunities to provide personalized shopping assistance and 24/7 frontline service. They can reduce the workload of human employees while delivering a seamless customer experience. Despite these benefits, the adoption of AI VAs as a retail marketing channel is patchy. The objective of this study is…	Adoption; AI; Chatbots; Conversational agents; Fuzzy AHP; Virtual assistants	analytical hierarchy process; artificial intelligence; consumption behavior; retailing; shopping activity; technology adoption	Adam M., Wessel M., Benlian A., AI-based chatbots in customer service and their effects on user compliance, Electron. Mark., 31, 2, pp. 427-445, (2021); Almulihi A.H., Alassery F., Khan A.I., Shukla S., Gupta B.K., Kumar R., Analyzing the implications of healthcare data breaches through computational technique, Intel. Automat. Soft Comput., pp. 1763-1779, (2022); Antioco M., Kleijnen M., Consumer…		Elsevier Ltd	13.1	Theme 10: retailing, mobile phone, shopping activity, social influence	retailing, mobile phone, shopping activity, social influence	Q1	10	90	0.5901	0.2244	68.1556	0.3416	0	0.5	0.0526	0.0175	4.2725	0	0.1463	0.8713	0.0249	0.75	Q1: Core / Established	Q1: Emerging / Growth
Dastane O.; Goi C.L.; Rabbanee F.	The development and validation of a scale to measure perceived value of mobile commerce (MVAL-SCALE)	2023	Journal of Retailing and Consumer Services	8	10.1016/j.jretconser.2022.103222	https://www.scopus.com/inward/record.uri?eid=2-s2.0-85144771596&doi=10.1016%2fj.jretconser.2022.103222&partnerID=40&md5=cc912c6bdc3e3f6c177659fc877d6e37	Mobile commerce (m-commerce) has unique characteristics that differentiate it from in-store and electronic commerce (e-commerce) in several aspects. Therefore, existing customer perceived value (CPV) scales developed for conventional business contexts may not thoroughly capture the CPV of m-commerce (M-VAL). Although a significant and increasing body of literature examined the benefits and costs …	Customer perceived value; Mobile apps; Mobile commerce; Netnography; Scale development	electronic commerce; innovation; mobile phone; model validation; retailing; shopping activity; technology adoption	Abdallah S., Jaleel B., Website appeal: development of an assessment tool and evaluation framework of e-marketing, Journal of theoretical and applied electronic commerce research, 10, 3, pp. 45-62, (2015); Akesson M., Value proposition in m-commerce: exploring service provider and user perceptions, Proceedings of 6th Annual Global Mobility Roundtable, 1-19, (2007); Alsheikh L., Bojei J., Determin…		Elsevier Ltd	13.1	Theme 10: retailing, mobile phone, shopping activity, social influence	retailing, mobile phone, shopping activity, social influence	Q1	10	90	0.5901	0.2244	68.1556	0.3416	0	0.5	0.0526	0.0175	4.2725	0	0.1463	0.8713	0.0249	0.75	Q1: Core / Established	Q1: Emerging / Growth
Röding T.; Steinmann S.; Wagner G.; Schramm-Klein H.	A classification of information-oriented PoS technology from customer perception	2023	Journal of Retailing and Consumer Services	2	10.1016/j.jretconser.2022.103126	https://www.scopus.com/inward/record.uri?eid=2-s2.0-85138762960&doi=10.1016%2fj.jretconser.2022.103126&partnerID=40&md5=4151bdc35cae7dc2c2b53903ba35d68d	When it comes to investigating how customers use POS technologies or which factors might promote their adoption, it is important to know which characteristics are particularly relevant from the customers' perspective. Based on three recent approaches to POS technology systematization, this research empirically categorizes POS technologies from the customer's point of view. We investigated POS tec…	Clustering; Information-oriented POS Technologies; MDS	classification; consumption behavior; marketing; perception; qualitative analysis; research work; retailing; technology adoption	Ahearne M., Rapp A., The role of technology at the interface between salespeople and consumers, J. Personal Sell. Sales Manag., 30, 2, pp. 111-120, (2010); Ahearne M., Jones E., Rapp A., Mathieu J., High touch through high tech: the impact of salesperson technology usage on sales performance via mediating mechanisms, Manag. Sci., 54, 4, pp. 671-685, (2008); Ahn T., Ryu S., Han I., The impact of W…		Elsevier Ltd	13.1	Theme 10: retailing, mobile phone, shopping activity, social influence	retailing, mobile phone, shopping activity, social influence	Q1	10	90	0.5901	0.2244	68.1556	0.3416	0	0.5	0.0526	0.0175	4.2725	0	0.1463	0.8713	0.0249	0.75	Q1: Core / Established	Q1: Emerging / Growth
Shang D.; Wu W.; Schroeder D.	Exploring determinants of the green smart technology product adoption from a sustainability adapted value-belief-norm perspective	2023	Journal of Retailing and Consumer Services	7	10.1016/j.jretconser.2022.103169	https://www.scopus.com/inward/record.uri?eid=2-s2.0-85141911603&doi=10.1016%2fj.jretconser.2022.103169&partnerID=40&md5=91f12395547272c6f36d346253e0090b	This study proposes a novel theoretical framework to explore the impact of sustainability-adapted value belief-norm factors on green smart technology product adoption using green smartwatches as an example, considering cross-cultural effects in emerging markets. A total of 829 responses were analyzed using the partial least squares structural equation model and multigroup analysis. The results im…	Cross-culture moderation; Environmental sustainability; Green smart technology; Perceived green value; Personal environmental beliefs; Personal norm	environmental management; least squares method; perception; stakeholder; sustainability; technological development; technology adoption	Agarwal J., Malhotra N.K., Bolton R.N., A cross-national and cross-cultural approach to global market segmentation: an application using consumers' perceived service quality, J. Int. Market., 18, pp. 18-40, (2010); Alsaad A.K., Ethical judgment, subjective norms, and ethical consumption: the moderating role of moral certainty, J. Retailing Consum. Serv., 59, (2021); (2021); Baumgart-Getz A., Prok…		Elsevier Ltd	13.1	Theme 2: china, investments, electric vehicle, electric vehicles	china, investments, electric vehicle, electric vehicles	Q1	2	462	0.2421	0.3314	47.0952	0.1576	0	0.5	0.4028	0.1343	6.843	0.9185	0.0957	0.3025	0.0068	0.0356	Q4: Emerging / Structural	Q4: Frontier / Niche
Baier D.; Stüber E.	Acceptance of recommendations to buy in online retailing	2010	Journal of Retailing and Consumer Services	79	10.1016/j.jretconser.2010.03.005	https://www.scopus.com/inward/record.uri?eid=2-s2.0-77952550958&doi=10.1016%2fj.jretconser.2010.03.005&partnerID=40&md5=041b63bb25fca38da4817a3a3caab410	Nowadays, many online shops try to improve their customer service by personalization. Personal welcomings, individual assistance as well as recommendations to inform and buy are getting an integral part of the customer communication. These new elements are assumed to increase the retailer's share of wallet and - ideally at the same time - the customer's satisfaction with the online shop. However,…	Online retailing; Recommendations to buy; Technology Acceptance Model	communication; design; electronic commerce; information system; Internet; model; retailing; service provision; shopping activity; technology adoption	Ahn H.J., Utilizing popularity characteristics for product recommendation, International Journal of Electronic Commerce, 11, 2, pp. 59-80, (2006); Aksoy L., Bloom P.N., Lurie N.H., Cooil B., Should recommendation agents think like people?, Journal of Service Research, 8, 4, pp. 297-315, (2006); Alba J., Lynch J., Weitz B., Janiszewski C., Lutz R., Sawyer A., Wood S., Interactive home shopping: co…			13.1	Theme 10: retailing, mobile phone, shopping activity, social influence	retailing, mobile phone, shopping activity, social influence	Q1	10	90	0.5901	0.2244	68.1556	0.3416	0	0.5	0.0526	0.0175	4.2725	0	0.1463	0.8713	0.0249	0.75	Q1: Core / Established	Q1: Emerging / Growth
Thaichon P.; Phau I.; Weaven S.	Moving from multi-channel to Omni-channel retailing: Special issue introduction	2022	Journal of Retailing and Consumer Services	35	10.1016/j.jretconser.2020.102311	https://www.scopus.com/inward/record.uri?eid=2-s2.0-85091111423&doi=10.1016%2fj.jretconser.2020.102311&partnerID=40&md5=0a3e8cc85fbe471cb379ed72d99cdeb3	In this special issue “Moving from Multi-Channel to Omni-Channel Retailing”, the Journal of Retailing and Consumer Services presents a series of papers covering topics to gain a better understanding of research and practices in the move toward Omni-channel retailing. The aim of the special issue is to gain a better understanding of marketing theory and practice in multi-channel and Omni-channel r…	Multi-channel; Multichannel; Omni-channel; Omnichannel; Retailing; Technology	consumption behavior; marketing; research; retailing; technology adoption	Ailawadi K.L., Farris P.W., Managing multi-and omni-channel distribution: metrics and research directions, J. Retailing, 93, 1, pp. 120-135, (2017); Beck N., Rygl D., Categorization of multiple channel retailing in multi-, cross-, and omni‐channel Retailing for retailers and retailing, J. Retailing Consum. Serv., 27, pp. 170-178, (2015); Behera R.K., Gunasekaran A., Gupta S., Kamboj S., Bala P.K.…		Elsevier Ltd	13.1	Theme 10: retailing, mobile phone, shopping activity, social influence	retailing, mobile phone, shopping activity, social influence	Q1	10	90	0.5901	0.2244	68.1556	0.3416	0	0.5	0.0526	0.0175	4.2725	0	0.1463	0.8713	0.0249	0.75	Q1: Core / Established	Q1: Emerging / Growth
Chen C.-C.; Chang C.-H.; Hsiao K.-L.	Exploring the factors of using mobile ticketing applications: Perspectives from innovation resistance theory	2022	Journal of Retailing and Consumer Services	36	10.1016/j.jretconser.2022.102974	https://www.scopus.com/inward/record.uri?eid=2-s2.0-85126964097&doi=10.1016%2fj.jretconser.2022.102974&partnerID=40&md5=edeb4aec9124bac0ca90150dc69ee664	This passenger resistance to adopting innovative mobile services has been widely discussed and needs more examination. The present research model used the innovation resistance theory factors, including usage barriers, value barriers, risk barriers, tradition barriers, and image barriers, to verify the antecedents of mobile ticketing application usage. A mobile ticketing app includes making seat …	Informativeness; Innovation resistance theory (IRT); Personal innovativeness; Technology anxiety; Word of mouth influence	innovation; Internet; marketing; mobile phone; retailing; software; technology adoption	Aaker D.A., Measuring brand equity across products and markets, Calif. Manag. Rev., 38, pp. 102-120, (1996); Agarwal R., Prasad J., A conceptual and operational definition of personal innovativeness in the domain of information technology, Inf. Syst. Res., 9, pp. 204-215, (1998); Alrajawy I., Isaac O., Ghosh A., Nusari M., Al-Shibami A.H., Ameen A.A., Determinants of Student's intention to use Mo…		Elsevier Ltd	13.1	Theme 10: retailing, mobile phone, shopping activity, social influence	retailing, mobile phone, shopping activity, social influence	Q1	10	90	0.5901	0.2244	68.1556	0.3416	0	0.5	0.0526	0.0175	4.2725	0	0.1463	0.8713	0.0249	0.75	Q1: Core / Established	Q1: Emerging / Growth
Gong T.; Wang C.-Y.; Lee K.	Effects of characteristics of in-store retail technology on customer citizenship behavior	2022	Journal of Retailing and Consumer Services	35	10.1016/j.jretconser.2021.102488	https://www.scopus.com/inward/record.uri?eid=2-s2.0-85100653309&doi=10.1016%2fj.jretconser.2021.102488&partnerID=40&md5=8cbc805b3ce7649e7286e9aac845c0ec	This paper investigates the effect of the characteristics of in-store retail technology on customer citizenship behavior (CCB) by adapting the job demands-resources theory, and explores how customer education moderates these relationships. Survey responses from 196 retail shoppers show that perceived complexity and perceived risk lead to customer exhaustion, resulting in decreasing CCB; while per…	Customer citizenship behavior; Customer engagement; Customer exhaustion; Perceived advantage; Perceived compatibility; Perceived complexity; Perceived risk	citizenship; demand analysis; innovation; retailing; risk assessment; technology adoption	Adapa S., Fazal-e-Hasan S.M., Makam S.B., Azeem M.M., Mortimer G., Examining the antecedents and consequences of perceived shopping value through smart retail technology, J. Retailing Consum. Serv., 52, (2020); Aloysius J.A., Hoehle H., Goodarzi S., Venkatesh V., Big data initiatives in retail environments: linking service process perceptions to shopping outcomes, Ann. Oper. Res., 270, 1-2, pp. 2…		Elsevier Ltd	13.1	Theme 10: retailing, mobile phone, shopping activity, social influence	retailing, mobile phone, shopping activity, social influence	Q1	10	90	0.5901	0.2244	68.1556	0.3416	0	0.5	0.0526	0.0175	4.2725	0	0.1463	0.8713	0.0249	0.75	Q1: Core / Established	Q1: Emerging / Growth
Alexander B.; Kent A.	Change in technology-enabled omnichannel customer experiences in-store	2022	Journal of Retailing and Consumer Services	56	10.1016/j.jretconser.2020.102338	https://www.scopus.com/inward/record.uri?eid=2-s2.0-85092734809&doi=10.1016%2fj.jretconser.2020.102338&partnerID=40&md5=88198d7a7eb230ae89286716729263e1	This paper explores changes in technology-enabled omnichannel customer experiences in stores over a five-year period (2014–2019). It contributes to the omnichannel-experience-management literature through customer technology-enabled touchpoints within fashion retail. Adopting an exploratory qualitative approach, primary data were obtained using semi-structured interviews with millennial consumers…	Customer experience; Fashion retail; In-store technologies; Omnichannel; Physical store; Purchase journey	consumption behavior; qualitative analysis; retailing; technology adoption	Alexander B., Commercial, social and experiential convergence: fashion's third places, J. Serv. Market., 33, 3, pp. 257-272, (2019); Alexander B., Blazquez Cano M., Store of the future: towards a (re)invention and (re)imagination of physical store space in an omnichannel context, J. Retailing Consum. Serv., 55, (2020); Arthur B.W., The Nature of Technology: what it Is and How it Evolves, (2009); …		Elsevier Ltd	13.1	Theme 10: retailing, mobile phone, shopping activity, social influence	retailing, mobile phone, shopping activity, social influence	Q1	10	90	0.5901	0.2244	68.1556	0.3416	0	0.5	0.0526	0.0175	4.2725	0	0.1463	0.8713	0.0249	0.75	Q1: Core / Established	Q1: Emerging / Growth
Soren A.A.; Chakraborty S.	Adoption, satisfaction, trust, and commitment of over-the-top platforms: An integrated approach	2024	Journal of Retailing and Consumer Services	2	10.1016/j.jretconser.2023.103574	https://www.scopus.com/inward/record.uri?eid=2-s2.0-85171805425&doi=10.1016%2fj.jretconser.2023.103574&partnerID=40&md5=8dfc26f2fa97ea3cef0c81a9ed68bd5a	This study attempts to understand the factors affecting usage intention, actual use, satisfaction, perceived trust, and commitment to over-the-top (OTT) platforms. A research model based on the Unified Theory of Acceptance and Use of Technology 2 (UTAUT2) and the Three-Component Model of commitment (TCM) is proposed and evaluated using partial least squares structural equation modeling (PLS-SEM).…	Affective commitment; Continuance commitment; Over-the-top (OTT) platforms; Perceived trust; Satisfaction; Three-component model (TCM); UTAUT2	hedonic analysis; integrated approach; least squares method; performance assessment; research work; technology adoption	Abbatescianni D., During Venice's VoD Market Day, Guy Bisson Discloses the Major Streaming Trends of the Last 18 Months - Industry Report: Distribution, Exhibition and Streaming, (2022); Agarwal R., Mehrotra A., Sharma V., Papa A., Malibari A., Over-the-top (OTT) retailing in the post pandemic world. Unveiling consumer drivers and barriers using a qualitative study, J. Retailing Consum. Serv., 75…		Elsevier Ltd	13.1	Theme 8: social media, social networking (online), knowledge, psychology	social media, social networking (online), knowledge, psychology	Q1	8	112	0.5845	0.1818	113.589	0.7384	0	0.5	0.2083	0.0694	5.2199	0.3385	0.096	0.3056	0.0183	0.4931	Q1: Core / Established	Q2: Mature / Potential
Gélinas-Chebat C.; Chebat D.-R.; Chebat M.-È.; Chebat É.-R.	Jean-Charles Shalom Chebat, (1945–2019) z’’l: An intimate perspective into his life	2021	Journal of Retailing and Consumer Services	0	10.1016/j.jretconser.2021.102700	https://www.scopus.com/inward/record.uri?eid=2-s2.0-85112015340&doi=10.1016%2fj.jretconser.2021.102700&partnerID=40&md5=ac88b775549702f93aea267f79f01b67	Professor Jean-Charles Chebat's successful career was widely recognized. He was respected by his peers and loved by his students. Numerous awards and recognitions highlighted his career. Hailed for his teaching skills both at home and abroad, an innovator and extremely versatile and prolific author, his work has impacted the academic world in many significant and exceptional ways. He has publishe…	Friendship; Jean-Charles Chebat; Marketing; Retail atmosphere; Scholarly achievement; Sociological Research	Alger [Algeria]; Algeria; Algiers; Haifa [Israel]; Israel; innovation; marketing; research work; retailing; teaching; technology adoption	Chebat E., Roth Y., Chebat J.C., How culture moderates the effects of justice in service recovery, Rev. Market. Sci., 18, 1, pp. 21-41, (2020); Chebat J.-C., Classe sociale, décisions et style de communication : le cas des familles francophones de Montréal, 21, 1, pp. 3-8, (1981); Chebat J.-C., Henault G., L'apport de la perception séquentielle et de la théorie de l'information à la sémiologie pu…		Elsevier Ltd	13.1	Theme 10: retailing, mobile phone, shopping activity, social influence	retailing, mobile phone, shopping activity, social influence	Q1	10	90	0.5901	0.2244	68.1556	0.3416	0	0.5	0.0526	0.0175	4.2725	0	0.1463	0.8713	0.0249	0.75	Q1: Core / Established	Q1: Emerging / Growth
Mondal J.; Chakrabarti S.	Insights and anatomy of brand experience in app-based retailing (eRBX): Critical play of physical evidence and enjoyment	2021	Journal of Retailing and Consumer Services	8	10.1016/j.jretconser.2021.102484	https://www.scopus.com/inward/record.uri?eid=2-s2.0-85101333901&doi=10.1016%2fj.jretconser.2021.102484&partnerID=40&md5=34f28e7593aa310ce1fc71d5981e4536	A unique brand experience (BX) is vital for marketers to create differentiation for their brands in a hyper price sensitive e-tail industry. While BX as a concept evolved in a physical-retailing environment, only a few studies extended the same in the e-tailing environment. Using ISM (interpretive structure modeling) and the MICMAC (Matrix Impact Cross-Reference Multiplication Applied to a Classi…	Brand experience; e-tail brand experience; Enjoyment in online shopping; Etailscape; Interpretive structure modeling; Mobile shopping; Physical evidence in e-commerce	electronic commerce; innovation; investment; marketing; retailing; shopping activity; technology adoption	Agatz N.A., Fleischmann M., Van Nunen J.A., E-fulfillment and multi-channel distribution: a review, Eur. J. Oper. Res., 187, pp. 339-356, (2008); Aghekyan-Simonian M., Forsythe S., Kwon W.S., Chattaraman V., The role of product brand image and online store image on perceived risks and online purchase intentions for apparel, J. Retailing Consum. Serv., 19, 3, pp. 325-331, (2012); Agrebi S., Jallai…		Elsevier Ltd	13.1	Theme 10: retailing, mobile phone, shopping activity, social influence	retailing, mobile phone, shopping activity, social influence	Q1	10	90	0.5901	0.2244	68.1556	0.3416	0	0.5	0.0526	0.0175	4.2725	0	0.1463	0.8713	0.0249	0.75	Q1: Core / Established	Q1: Emerging / Growth
Silva E.S.; Bonetti F.	Digital humans in fashion: Will consumers interact?	2021	Journal of Retailing and Consumer Services	53	10.1016/j.jretconser.2020.102430	https://www.scopus.com/inward/record.uri?eid=2-s2.0-85098729733&doi=10.1016%2fj.jretconser.2020.102430&partnerID=40&md5=4f5465d4aff1fd2091f8f71b78282515	The ongoing COVID-19 pandemic is disrupting the fashion industry and forcing fashion businesses to accelerate their digital transformation. The increased need for more sustainable fashion business operations, when coupled with the prospect that business might never be as usual again, calls for innovative e-commerce led practices. Recently, stakeholders have been experimenting with the idea of int…	Consumer behaviour; Digital humans; E-commerce; Fashion business; Innovative technologies; Interaction	clothing industry; consumption behavior; electronic commerce; innovation; retailing; stakeholder; technology adoption	The Human Experience: how organizations should respond to the experience implications of COVID-19, (2020); Ang X., From catwalk to augmented reality: Fiona Xie commands your screens (and hearts) in a Valentino turtleneck, (2020); Benbunan-Fich R., User satisfaction with wearables, AIS Trans. Hum.-Comput. Interact., 12, 1, pp. 1-27, (2020); Bertola P., Teunissen J., Fashion 4.0. Innovating fashion…		Elsevier Ltd	13.1	Theme 10: retailing, mobile phone, shopping activity, social influence	retailing, mobile phone, shopping activity, social influence	Q1	10	90	0.5901	0.2244	68.1556	0.3416	0	0.5	0.0526	0.0175	4.2725	0	0.1463	0.8713	0.0249	0.75	Q1: Core / Established	Q1: Emerging / Growth
Sharma P.; Ueno A.; Kingshott R.	Self-service technology in supermarkets – Do frontline staff still matter?	2021	Journal of Retailing and Consumer Services	30	10.1016/j.jretconser.2020.102356	https://www.scopus.com/inward/record.uri?eid=2-s2.0-85093946261&doi=10.1016%2fj.jretconser.2020.102356&partnerID=40&md5=8c476d50d77c68c905dc9b81848288bc	This paper uses the concept of psychological distance under construal level theory to explore the differences in the customers’ evaluations of overall store quality, satisfaction and loyalty, based on their experiences with the traditional staff-checkout method and the relatively new self-checkout machines. Two empirical studies, a field survey with retail shoppers in UK (N1 = 313) and an online …	Checkout methods; Self-service technology; Store loyalty; Store quality; Supermarkets	Australia; United Kingdom; conceptual framework; retailing; service quality; service sector; shopping activity; supermarket; technology adoption	Adapa S., Fazal-e-Hasan S.M., Makam S.B., Azeem M.M., Mortimer G., Examining the antecedents and consequences of perceived shopping value through smart retail technology, J. Retailing Consum. Serv., 52, January, (2020); Alhathal F.T., Sharma P., Kingshott R.P.J., Moderating effects of service separation on customer relationships with service firms: a social-exchange perspective, J. Serv. Theory P…		Elsevier Ltd	13.1	Theme 10: retailing, mobile phone, shopping activity, social influence	retailing, mobile phone, shopping activity, social influence	Q1	10	90	0.5901	0.2244	68.1556	0.3416	0	0.5	0.0526	0.0175	4.2725	0	0.1463	0.8713	0.0249	0.75	Q1: Core / Established	Q1: Emerging / Growth
Tiwari A.A.; Chakraborty A.; Maity M.	Technology product coolness and its implication for brand love	2021	Journal of Retailing and Consumer Services	32	10.1016/j.jretconser.2020.102258	https://www.scopus.com/inward/record.uri?eid=2-s2.0-85089906385&doi=10.1016%2fj.jretconser.2020.102258&partnerID=40&md5=7deec09af6b97aef506296d736a08987	Increased similarity of features of technology products has led to a waning of unique differentiating factors. In an absence of any tangible unique selling proposition, coolness has emerged as one of the compelling differentiators. This study investigates the coolness of technology products through in-depth interviews and an application of the critical incident technique (CIT). Thereafter, the fi…		innovation; marketing; model validation; modeling; qualitative analysis; reliability analysis; retailing; technology adoption	Aaker J.L., Dimensions of brand personality, J. Market. Res., 34, 3, pp. 347-356, (1997); Ahuvia A.C., Beyond the extended self: loved objects and consumers' identity narratives, J. Consum. Res., 32, 1, pp. 171-184, (2005); Albert N., Merunka D., Valette-Florence P., When consumers love their brands: exploring the concept and its dimensions, J. Bus. Res., 61, 10, pp. 1062-1075, (2008); Arora K., …		Elsevier Ltd	13.1	Theme 10: retailing, mobile phone, shopping activity, social influence	retailing, mobile phone, shopping activity, social influence	Q1	10	90	0.5901	0.2244	68.1556	0.3416	0	0.5	0.0526	0.0175	4.2725	0	0.1463	0.8713	0.0249	0.75	Q1: Core / Established	Q1: Emerging / Growth
Ramírez-Correa P.; Rondán-Cataluña F.J.; Arenas-Gaitán J.; Martín-Velicia F.	Analysing the acceptation of online games in mobile devices: An application of UTAUT2	2019	Journal of Retailing and Consumer Services	117	10.1016/j.jretconser.2019.04.018	https://www.scopus.com/inward/record.uri?eid=2-s2.0-85065172788&doi=10.1016%2fj.jretconser.2019.04.018&partnerID=40&md5=feb859f01f5cea313351750410c9586e	The aim of this paper is to analyse the acceptance of online games, based on the unified theory of acceptance and use of technology 2 (UTAUT 2). The data analysed correspond to a sample of online players through mobile devices in Spain. A structural equation approach based on Partial Least Squares was used to assess the acceptance model. The result of the analysis indicates that UTAUT 2 explains …	Acceptation of technology; Mobile devices; Online games; Spain; UTAUT2	Spain; hedonic analysis; least squares method; mobile phone; numerical model; technology adoption; World Wide Web	Bodrova E., Leong D.J., Vygotskian and post-Vygotskian views on children's play, Am. J. Play, 7, 3, (2015); Brauner P., Ziefle M., Serious Games for Cognitive Training in Ambient Assisted Living Environments, pp. 1-18, (2015); Buxbaum O., Key Insights into Basic Mechanisms of Mental Activity, (2016); Caillois R., Man, Play, and Games, (1961); Chang I.-C., Liu C.-C., Chen K., The effects of hedoni…		Elsevier Ltd	13.1	Theme 10: retailing, mobile phone, shopping activity, social influence	retailing, mobile phone, shopping activity, social influence	Q1	10	90	0.5901	0.2244	68.1556	0.3416	0	0.5	0.0526	0.0175	4.2725	0	0.1463	0.8713	0.0249	0.75	Q1: Core / Established	Q1: Emerging / Growth
Alkire (née Nasr) L.; O'Connor G.E.; Myrden S.; Köcher S.	Patient experience in the digital age: An investigation into the effect of generational cohorts	2020	Journal of Retailing and Consumer Services	41	10.1016/j.jretconser.2020.102221	https://www.scopus.com/inward/record.uri?eid=2-s2.0-85087877530&doi=10.1016%2fj.jretconser.2020.102221&partnerID=40&md5=e7f874ce53301454f50d8abdfe40804e	This research examines how patient experience is affected by various generational cohorts’ perceived ease of use and usefulness of healthcare patient portals and how this experience, in turn, shapes cohort technology use. Results suggest that digital technology needs to be designed and implemented with cohorts in mind. This study complements research in digital technology and customer experience …	Age; Digital health; Generational cohort theory; Healthcare; Patient experience	cohort analysis; consumption behavior; health care; information and communication technology; perception; technology adoption	Ariens L.F., Schussler-Raymakers F.M., Frima C., Flinterman A., Hamminga E., Arents B.W., Bruijnzeel-Koomen C.A., de Bruin-Weller M.S., van Os-Medendorp H., Barriers and facilitators to eHealth use in daily practice: perspectives of patients and professionals in dermatology, J. Med. Internet Res., 19, 9, (2017); Augenstein J., Opportunities to expand telehealth use amid the coronavirus pandemic, …		Elsevier Ltd	13.1	Theme 5: health care, mhealth, india, internet of things	health care, mhealth, india, internet of things	Q1	5	136	0.2703	0.3017	47.4706	0.1609	0	0.5	0.6316	0.2105	5.3761	0.3943	0.0957	0.3027	0.015	0.3605	Q3: Niche / Transient	Q4: Frontier / Niche
Pleyers G.; Poncin I.	Non-immersive virtual reality technologies in real estate: How customer experience drives attitudes toward properties and the service provider	2020	Journal of Retailing and Consumer Services	64	10.1016/j.jretconser.2020.102175	https://www.scopus.com/inward/record.uri?eid=2-s2.0-85086469365&doi=10.1016%2fj.jretconser.2020.102175&partnerID=40&md5=ada1e3e5a66b047cd237657dcb76404c	Although previous research has highlighted that virtual reality (VR) technologies can enhance customer experience, the efficacy of VR technologies in real estate remains unclear. Therefore, this study examines the effects of offering consumers a non-immersive VR experience via a widely available technology, that allows them to view real estate products. Participants accessed the website of a real…	360° visit; Customer experience; Non-immersive virtual reality; Service provider	consumption behavior; innovation; technological development; technology adoption; virtual reality	Ahn T., Ryu S., Han I., The impact of Web quality and playfulness on user acceptance of online retailing, Inf. Manag., 44, 3, pp. 263-275, (2007); Anteblian B., Filser M., Roederer C., Consumption experience in retail environments: a literature review, Rech. Appl. Market., 28, 3, pp. 82-109, (2013); Batra R., Stephens D., Attitudinal effects of ad-evoked moods and emotions: the moderating role of…		Elsevier Ltd	13.1	Theme 9: virtual reality, tourism, travel behavior, tourist destination	virtual reality, tourism, travel behavior, tourist destination	Q1	9	131	0.615	0.2999	73.1527	0.3852	0	0.5	0.4167	0.1389	4.9732	0.2504	0.1577	1	0.0208	0.5899	Q1: Core / Established	Q1: Emerging / Growth
Baier D.; Rese A.	How to increase multichannel shopping satisfaction? An adapted Kano based stage-gate approach to select new technologies	2020	Journal of Retailing and Consumer Services	19	10.1016/j.jretconser.2020.102172	https://www.scopus.com/inward/record.uri?eid=2-s2.0-85083638790&doi=10.1016%2fj.jretconser.2020.102172&partnerID=40&md5=8ffd9720e5a744fe69a66bd9bd0f28b5	Today, brick-and-mortar retailers with integrated online shops have many alternatives to increase their customers’ shopping satisfaction: They could invest in (for the retailers) new physical store technologies (e.g., beacons or magical mirrors if not implemented up to now), new online shop technologies (e.g., visual tagging or webcams), or in new less technology-based improvement options (e.g. e…	Kano model; Multichannel shopping; New online shop technologies; New physical store technologies; Segmented Kano perspective; Stage-gate approach	consumption behavior; retailing; shopping activity; technological development; technology adoption	Accenture, A New Era for Retail: cloud Computing Changes the Game, (2013); Arbore A., Busacca B., Customer satisfaction and dissatisfaction in retail banking: exploring the asymmetric impact of attribute performances, J. Retailing Consum. Serv., 16, 4, pp. 271-280, (2009); Baier D., Kullak F., Woratschek H., “New” techniques for site engineering: Kano and jobs-to-Be-done revisited, 6th German-Jap…		Elsevier Ltd	13.1	Theme 10: retailing, mobile phone, shopping activity, social influence	retailing, mobile phone, shopping activity, social influence	Q1	10	90	0.5901	0.2244	68.1556	0.3416	0	0.5	0.0526	0.0175	4.2725	0	0.1463	0.8713	0.0249	0.75	Q1: Core / Established	Q1: Emerging / Growth
Kaur P.; Dhir A.; Singh N.; Sahu G.; Almotairi M.	An innovation resistance theory perspective on mobile payment solutions	2020	Journal of Retailing and Consumer Services	194	10.1016/j.jretconser.2020.102059	https://www.scopus.com/inward/record.uri?eid=2-s2.0-85083066200&doi=10.1016%2fj.jretconser.2020.102059&partnerID=40&md5=bb27aaeeeed566907ac7286b1e14a12d	Mobile payment solutions (MPSs) are experiencing growth and popularity across the globe because of their convenience and other benefits in performing transactions. However, despite these circumstances and the benefits offered, MPSs are still suffering from challenging situations related to their adoption and usage. The main challenge MPSs have faced in retail is because of the presence of consume…	Consumer behavior; Innovation resistance theory (IRT); Intentions to recommend; Mobile payments; Resistance; Use intention	consumption behavior; economic theory; electronic commerce; innovation; model; retailing; technology adoption	Anderson J.C., Gerbing D.W., Structural equation modeling in practice: a review and recommended two-step approach, Psychol. Bull., 103, 3, pp. 411-442, (1988); Andrew J., Klein J., The boycott puzzle: consumer motivation for purchase sacrifice, Manag. Sci., 49, pp. 1196-1209, (2003); Antioco M., Kleijnen M., Consumer adoption of technological innovations: effects of psychological and functional b…		Elsevier Ltd	13.1	Theme 10: retailing, mobile phone, shopping activity, social influence	retailing, mobile phone, shopping activity, social influence	Q1	10	90	0.5901	0.2244	68.1556	0.3416	0	0.5	0.0526	0.0175	4.2725	0	0.1463	0.8713	0.0249	0.75	Q1: Core / Established	Q1: Emerging / Growth
Mainardes E.W.; de Souza I.M.; Correia R.D.	Antecedents and consequents of consumers not adopting e-commerce	2020	Journal of Retailing and Consumer Services	39	10.1016/j.jretconser.2020.102138	https://www.scopus.com/inward/record.uri?eid=2-s2.0-85083881571&doi=10.1016%2fj.jretconser.2020.102138&partnerID=40&md5=965951469208f3941fabb77edc11c13a	This study investigated the antecedent and consequent factors of the non-adoption behavior of e-commerce, based on the Theory of Planned Behavior (TPB). For the antecedents, this research used the constructs of ‘attitude’, ‘subjective norms’, ‘perceived behavioral control (PBC)’, and ‘intention’. For the consequents, the constructs were ‘negative word-of-mouth’ and ‘disinterest in e-commerce’. Th…	Disinterest in e-commerce; E-commerce; negative word-of-mouth; Resistance to e-commerce; Theory of planned behavior	consumption behavior; electronic commerce; numerical model; perception; shopping activity; technology adoption; theoretical study	Ajzen I., The theory of planned behaviour: reactions and reflections, Psychol. Health, 26, 9, pp. 1113-1127, (2011); Ajzen I., Fishbein M., A theoretical analysis and review of empirical research, Psychol. Bull., 84, 5, pp. 888-918, (1977); Al-Debei M.M., Al-Lozi E., Papazafeiropoulou A., Why people keep coming back to Facebook: explaining and predicting continuance participation from an extended…		Elsevier Ltd	13.1	Theme 10: retailing, mobile phone, shopping activity, social influence	retailing, mobile phone, shopping activity, social influence	Q1	10	90	0.5901	0.2244	68.1556	0.3416	0	0.5	0.0526	0.0175	4.2725	0	0.1463	0.8713	0.0249	0.75	Q1: Core / Established	Q1: Emerging / Growth
Talwar S.; Dhir A.; Khalil A.; Mohan G.; Islam A.K.M.N.	Point of adoption and beyond. Initial trust and mobile-payment continuation intention	2020	Journal of Retailing and Consumer Services	183	10.1016/j.jretconser.2020.102086	https://www.scopus.com/inward/record.uri?eid=2-s2.0-85081246675&doi=10.1016%2fj.jretconser.2020.102086&partnerID=40&md5=3138c42d63eabb794b5d7357861d8c2f	Initial trust represents the trust that develops upon first use of a product. It is built on the basis of the net effect of factors that stimulate as well as inhibit it. Future transactions require less consumer effort after initial-trust formation. Despite being recognized as an important factor affecting the adoption of innovations, initial trust has been not been greatly explored by prior scho…	Expectation confirmation theory (ECT); Information systems success (ISS) model; IT continuance model; Mobile payment; Post-adoption factors; Transaction cost economics (TCE) theory	cost-benefit analysis; information system; innovation; Internet; mobile phone; retailing; service quality; technology adoption	Acker A., Murthy D., Venmo: understanding mobile payments as social media, ACM Int. Conf. Proc. Ser., (2018); Agag G., El-Masry A.A., Understanding consumer intention to participate in online travel community and effects on consumer intention to purchase travel online and WOM: an integration of innovation diffusion theory and TAM with trust, Comput. Hum. Behav., (2016); Akrout H., Nagy G., Trust …		Elsevier Ltd	13.1	Theme 10: retailing, mobile phone, shopping activity, social influence	retailing, mobile phone, shopping activity, social influence	Q1	10	90	0.5901	0.2244	68.1556	0.3416	0	0.5	0.0526	0.0175	4.2725	0	0.1463	0.8713	0.0249	0.75	Q1: Core / Established	Q1: Emerging / Growth
Fan X.; Chai Z.; Deng N.; Dong X.	Adoption of augmented reality in online retailing and consumers’ product attitude: A cognitive perspective	2020	Journal of Retailing and Consumer Services	114	10.1016/j.jretconser.2019.101986	https://www.scopus.com/inward/record.uri?eid=2-s2.0-85074690694&doi=10.1016%2fj.jretconser.2019.101986&partnerID=40&md5=002b831bcbbfe07c98fb2c10abae3165	With the application of augmented reality (AR) technology by online retailers to improve online services, the impact of AR adoption on consumer behavior has attracted attention both in academic and in practical circles. Based on the cognitive perspective of information processing and from the two aspects of cognitive load and cognitive fluency, this study discusses the influence of AR adoption on…	Augmented reality; Cognitive fluency; Cognitive load	cognition; consumption behavior; Internet; retailing; technology adoption; virtual reality	Alter A.L., Oppenheimer D.M., Uniting the tribes of fluency to form a metacognitive nation, Personal. Soc. Psychol. Rev., 13, 3, pp. 219-235, (2009); Azuma R., Baillot Y., Behringer R., Feiner S., Julier S., MacIntyre B., Recent advances in augmented reality, IEEE Comput. Graph. Appl., 21, 6, pp. 34-47, (2001); Barsalou L.W., Grounded cognition, Annu. Rev. Psychol., 59, pp. 617-645, (2008); Beck …		Elsevier Ltd	13.1	Theme 9: virtual reality, tourism, travel behavior, tourist destination	virtual reality, tourism, travel behavior, tourist destination	Q1	9	131	0.615	0.2999	73.1527	0.3852	0	0.5	0.4167	0.1389	4.9732	0.2504	0.1577	1	0.0208	0.5899	Q1: Core / Established	Q1: Emerging / Growth
Farah M.F.; Ramadan Z.B.	Viability of Amazon's driven innovations targeting shoppers’ impulsiveness	2020	Journal of Retailing and Consumer Services	28	10.1016/j.jretconser.2019.101973	https://www.scopus.com/inward/record.uri?eid=2-s2.0-85073574259&doi=10.1016%2fj.jretconser.2019.101973&partnerID=40&md5=4038db3998214aeeaf98494a4f749e0a	The growth of new technological innovations has given rise to a highly digitized retailing world that is re-defining the consumer purchase journey. Innovations, such as Amazon's Alexa, Dash-buttons (physical and virtual), and Spark, have indeed led to the creation of an Omni-channel journey that reshaped the shopping experience. Such tech-disruptions are likely to have a significant bearing on sh…	Affective experience; Amazon; Disruptive technology; E-commerce; Impulsive buying; WOM	Alexa; consumption behavior; electronic commerce; innovation; retailing; shopping activity; technology adoption	Fenton-O'Creevy M., Dibb S., Furnham A., “Antecedents and consequences of chronic impulsive buying: can impulsive buying be understood as dysfunctional self‐regulation?”, Psychol. Mark., 35, 3, pp. 175-188, (2018); Abu-Khzam F.N., Lamaa K., Efficient heuristic algorithms for positive-influence dominating set in social networks, IEEE INFOCOM 2018-IEEE Conference on Computer Communications Workshop…		Elsevier Ltd	13.1	Theme 10: retailing, mobile phone, shopping activity, social influence	retailing, mobile phone, shopping activity, social influence	Q1	10	90	0.5901	0.2244	68.1556	0.3416	0	0.5	0.0526	0.0175	4.2725	0	0.1463	0.8713	0.0249	0.75	Q1: Core / Established	Q1: Emerging / Growth
Singh N.; Sinha N.	How perceived trust mediates merchant's intention to use a mobile wallet technology	2020	Journal of Retailing and Consumer Services	174	10.1016/j.jretconser.2019.101894	https://www.scopus.com/inward/record.uri?eid=2-s2.0-85069673411&doi=10.1016%2fj.jretconser.2019.101894&partnerID=40&md5=c4a95a11aec1b9bffff0e5e2b6487bde	As mobile wallets are in constant demand and growing over the past few years, there is a need to identify views of different stakeholders involved in the process. Several studies have been done to investigate consumers' perspective intensively. On the other hand, review of perception and adoption of wallet services by other participants, in particular merchants, is often neglected. The present st…	Customer value addition; Intention to use; Merchants; Mobile wallets; Perceived trust	consumption behavior; empirical analysis; mobile phone; perception; retailing; stakeholder; technology adoption	Abhishek, Hemchand S., Adoption of sensor-based communication for mobile marketing in India, Journal of Indian Business Research, 8, 1, pp. 65-76, (2016); Alalwan A.A., Dwivedi Y.K., Rana N., Factors influencing adoption of mobile banking by Jordanian bank customers: extending UTAUT2 with trust, Int. J. Inf. Manag., 37, 3, pp. 99-110, (2017); Barbuta I., Dobrean S., Gaza M., Mihaila M., Screpnic …		Elsevier Ltd	13.1	Theme 10: retailing, mobile phone, shopping activity, social influence	retailing, mobile phone, shopping activity, social influence	Q1	10	90	0.5901	0.2244	68.1556	0.3416	0	0.5	0.0526	0.0175	4.2725	0	0.1463	0.8713	0.0249	0.75	Q1: Core / Established	Q1: Emerging / Growth
Zhou M.; Zhao L.; Kong N.; Campy K.S.; Xu G.; Zhu G.; Cao X.; Wang S.	Understanding consumers’ behavior to adopt self-service parcel services for last-mile delivery	2020	Journal of Retailing and Consumer Services	87	10.1016/j.jretconser.2019.101911	https://www.scopus.com/inward/record.uri?eid=2-s2.0-85070598259&doi=10.1016%2fj.jretconser.2019.101911&partnerID=40&md5=6e10faa7cd6c547659a783d6cce92096	Self-service parcel delivery service has been favored by E-commerce retailers as an effective solution to the “last-mile” delivery, and consumers' adoption behavior is the key point to apply this emerging technology. The aim of the present study is to empirically test the influence of psychological factors on online consumers’ behavioral intention to adopt it. An extended UTAUT model is developed…	China; Perceived risk; Perceived satisfaction; Self-service parcel delivery service; UTAUT	China; consumption behavior; electronic commerce; information technology; performance assessment; retailing; risk perception; service provision; technology adoption	Alalwan A.A., Dwivedi Y.K., Rana N.P., Algharabat R., Examining factors influencing Jordanian customers' intentions and adoption of internet banking: extending UTAUT2 with risk, J. Retail. Consum. Serv., 40, pp. 125-138, (2018); Andres Quintero J., Ruth Felix E., Eduardo Rincon L., Crisspin M., Fernandez Baca J., Khwaja Y., Cardona C.A., Social and techno-economical analysis of biodiesel producti…		Elsevier Ltd	13.1	Theme 2: china, investments, electric vehicle, electric vehicles	china, investments, electric vehicle, electric vehicles	Q1	2	462	0.2421	0.3314	47.0952	0.1576	0	0.5	0.4028	0.1343	6.843	0.9185	0.0957	0.3025	0.0068	0.0356	Q4: Emerging / Structural	Q4: Frontier / Niche
Adapa S.; Fazal-e-Hasan S.M.; Makam S.B.; Azeem M.M.; Mortimer G.	Examining the antecedents and consequences of perceived shopping value through smart retail technology	2020	Journal of Retailing and Consumer Services	109	10.1016/j.jretconser.2019.101901	https://www.scopus.com/inward/record.uri?eid=2-s2.0-85070226119&doi=10.1016%2fj.jretconser.2019.101901&partnerID=40&md5=34000f689b65c587ca6274c87eaf04b3	This study examines the antecedents and consequences of perceived shopping value through smart retail technology. Specifically, we propose that perceived complexity, perceived advantage, perceived novelty and perceived risk of using smart retail technologies determine consumers’ perceived shopping value, which, in turn, influences their store loyalty and intentions to adopt smart retail technolog…	Innovativeness; Intentions to adopt; Loyalty; Retail technology; Value	consumption behavior; corporate strategy; implementation process; innovation; retailing; shopping activity; technological development; technology adoption	Adams J.S., Towards an understanding of inequity, J. Abnorm. Soc. Psychol., 67, 5, (1963); Agarwal R., Prasad J., A conceptual and operational definition of personal innovativeness in the domain of information technology, Inf. Syst. Res., 9, 2, (1998); Ailawadi K.L., Neslin S.A., Gedenk K., Pursuing the value-conscious consumer: store brands versus national brand promotions, J. Mark., 65, 1, pp. …		Elsevier Ltd	13.1	Theme 10: retailing, mobile phone, shopping activity, social influence	retailing, mobile phone, shopping activity, social influence	Q1	10	90	0.5901	0.2244	68.1556	0.3416	0	0.5	0.0526	0.0175	4.2725	0	0.1463	0.8713	0.0249	0.75	Q1: Core / Established	Q1: Emerging / Growth
Garnier M.; Poncin I.	Do enriched digital catalogues offer compelling experiences, beyond websites? A comparative analysis through the IKEA case	2019	Journal of Retailing and Consumer Services	8	10.1016/j.jretconser.2018.12.011	https://www.scopus.com/inward/record.uri?eid=2-s2.0-85059779487&doi=10.1016%2fj.jretconser.2018.12.011&partnerID=40&md5=31a04b373e31c216527caaf5b94be604	Technology supports digital versions of catalogues, enriched with rich media tools, in an effort to create compelling consumer experiences. Yet these digital catalogues also share several similarities with websites, so why display both? Digital enriched catalogues could be promising to generate a compelling experience for consumers. However, is it really the case? To determine why retailers might…	Compelling experience; Digital catalogue; Enrichments; Hedonic value; Utilitarian value; Website	comparative study; consumption behavior; electronic commerce; hedonic analysis; retailing; technology adoption; World Wide Web	Anteblian B., Filser M., Roederer C., Consumption experience in retail environments: a literature review, Rech. Appl. Mark. (Engl. Ed.), 28, 3, pp. 82-109, (2013); Arnold M.J., Reynolds K.E., Ponder N., Lueg J.E., Customer delight in a retail context: investigating delightful and terrible shopping experiences, J. Bus. Res., 58, 8, pp. 1132-1145, (2005); Babin B.J., Darden W.R., Griffin M., Work a…		Elsevier Ltd	13.1	Theme 10: retailing, mobile phone, shopping activity, social influence	retailing, mobile phone, shopping activity, social influence	Q1	10	90	0.5901	0.2244	68.1556	0.3416	0	0.5	0.0526	0.0175	4.2725	0	0.1463	0.8713	0.0249	0.75	Q1: Core / Established	Q1: Emerging / Growth
Park J.; Ahn J.; Thavisay T.; Ren T.	Examining the role of anxiety and social influence in multi-benefits of mobile payment service	2019	Journal of Retailing and Consumer Services	145	10.1016/j.jretconser.2018.11.015	https://www.scopus.com/inward/record.uri?eid=2-s2.0-85057856138&doi=10.1016%2fj.jretconser.2018.11.015&partnerID=40&md5=eb3425c30b7f5381984227578fe677ea	Although there has been a steady increase in the offering and promoting of mobile payment services, a slow uptake in adoption has been reported. This present study proposes a research model, grounded in mental accounting theory, investigating the intention to adopt mobile payment services by emphasizing the role of multiple benefits. A total of 361 valid responses were collected from potential U.…	Attitude; Intention to use; Mobile payment services; Multiple benefits; Social influences; Technology anxiety	attitudinal survey; mobile phone; social media; technology adoption	Agrebi S., Jallais J., Explain the intention to use smartphones for mobile shopping, J. Retail. Consum. Serv., 22, pp. 16-23, (2015); Ajzen I., Fishbein M., Attitude-behavior relations: a theoretical analysis and review of empirical research, Psychol. Bull., 84, 5, pp. 888-918, (1977); Arbuckle J.L., Wothke W., Amos 4.0 user's guide, Mark. Dep. SPSS Inc., (1999); Aurier P., Evrard Y., N'goala G.,…		Elsevier Ltd	13.1	Theme 8: social media, social networking (online), knowledge, psychology	social media, social networking (online), knowledge, psychology	Q1	8	112	0.5845	0.1818	113.589	0.7384	0	0.5	0.2083	0.0694	5.2199	0.3385	0.096	0.3056	0.0183	0.4931	Q1: Core / Established	Q2: Mature / Potential
Purani K.; Kumar D.S.; Sahadev S.	e-Loyalty among millennials: Personal characteristics and social influences	2019	Journal of Retailing and Consumer Services	62	10.1016/j.jretconser.2019.02.006	https://www.scopus.com/inward/record.uri?eid=2-s2.0-85062000089&doi=10.1016%2fj.jretconser.2019.02.006&partnerID=40&md5=300b09f7aff474015809d6f68cee5350	This study develops and validates a new, personal characteristics and peer influence based perspective on e-loyalty formation among millennial customers. Deviating from existing models, it examines the indirect influence of personal characteristics like perceived compatibility, innovativeness and peer influence in terms of perceived subjective norms. Data are collected from 380 millennial respond…		India; electronic commerce; marketing; retailing; technology adoption	Agag G., El-Masry A.A., Understanding consumer intention to participate in online travel community and effects on consumer intention to purchase travel online and WOM: an integration of innovation diffusion theory and TAM with trust, Comput. Hum. Behav., 60, pp. 97-111, (2016); Agarwal R., Karahanna E., pp. 13-16, (1998); Agarwal R., Prasad J., A conceptual and operational definition of personal …		Elsevier Ltd	13.1	Theme 5: health care, mhealth, india, internet of things	health care, mhealth, india, internet of things	Q1	5	136	0.2703	0.3017	47.4706	0.1609	0	0.5	0.6316	0.2105	5.3761	0.3943	0.0957	0.3027	0.015	0.3605	Q3: Niche / Transient	Q4: Frontier / Niche
Faqih K.M.S.; Jaradat M.I.R.M.	Assessing the moderating effect of gender differences and individualism-collectivism at individual-level on the adoption of mobile commerce technology: TAM3 perspective	2015	Journal of Retailing and Consumer Services	279	10.1016/j.jretconser.2014.09.006	https://www.scopus.com/inward/record.uri?eid=2-s2.0-84919458970&doi=10.1016%2fj.jretconser.2014.09.006&partnerID=40&md5=6b24428b38d2d61e8a3e8db74d2baf7f	This study investigates the adoption of mobile commerce in Jordan. Based on TAM3 theory, the study proposes a theoretical framework, and then examines its perceived usefulness and perceived ease of use to explain the individual's adoption intentions toward mobile commerce. This study also investigates the moderation role of gender difference and individualism-collectivism measured at individual-l…	Gender; Image; Individualism-collectivism at individual-level (ICAIL); Mobile commerce (m-commerce); Technology acceptance model3 (TAM3)	Jordan; electronic commerce; gender; individualism; mobile communication; perception; retailing; technology adoption	Abu-Shanab E., Ghaleb O., Adoption of Mobile Commerce Technology: An Involvement of Trust and Risk Concerns, International Journal of Technology Diffusion, 3, 2, pp. 36-49, (2012); Agarwala T., Factors influencing career choice of management students in India, Career Dev. Int., 13, 4, pp. 362-376, (2008); Ahuja M.K., Chudoba K.M., Kacmar C.J., McKnight D.H., George J.F., IT road warriors: balanci…		Elsevier Ltd	13.1	Theme 10: retailing, mobile phone, shopping activity, social influence	retailing, mobile phone, shopping activity, social influence	Q1	10	90	0.5901	0.2244	68.1556	0.3416	0	0.5	0.0526	0.0175	4.2725	0	0.1463	0.8713	0.0249	0.75	Q1: Core / Established	Q1: Emerging / Growth
Bulmer S.; Elms J.; Moore S.	Exploring the adoption of self-service checkouts and the associated social obligations of shopping practices	2018	Journal of Retailing and Consumer Services	47	10.1016/j.jretconser.2018.01.016	https://www.scopus.com/inward/record.uri?eid=2-s2.0-85044866715&doi=10.1016%2fj.jretconser.2018.01.016&partnerID=40&md5=f3035338033f2faa7ae7449b2a98e4d3	While retailers and other service providers are increasingly introducing self-service checkouts into stores, these technologies do not have universal appeal for consumers. The literature offers limited understanding of how self-service checkouts influence shopping practices and consumers’ experiences of the in-store environment. Using the lens of practice theory, this paper explores adoption of s…	Adoption; Practice; Self-service checkouts; Shopping; Social obligations; Technology	consumption behavior; management; retailing; shopping activity; technology adoption	Alexander A., Nell D., Bailey A.R., Shaw G., The co-creation of a retail innovation: shoppers and the early supermarket in Britain, Enterp. Soc., 10, 3, pp. 529-558, (2009); Alexander A., Phillips S., Shaw G., Retail innovation and shopping practices: consumers' reactions to self-service retailing, Environ. Plan. A, 40, 9, pp. 2204-2221, (2008); Bailey A.R., Shaw G., Alexander A., Nell D., Consum…		Elsevier Ltd	13.1	Theme 10: retailing, mobile phone, shopping activity, social influence	retailing, mobile phone, shopping activity, social influence	Q1	10	90	0.5901	0.2244	68.1556	0.3416	0	0.5	0.0526	0.0175	4.2725	0	0.1463	0.8713	0.0249	0.75	Q1: Core / Established	Q1: Emerging / Growth
Santos-Vijande M.L.; Gómez-Rico M.; Molina-Collado A.; Davison R.M.	Building user engagement to mhealth apps from a learning perspective: Relationships among functional, emotional and social drivers of user value	2022	Journal of Retailing and Consumer Services	21	10.1016/j.jretconser.2022.102956	https://www.scopus.com/inward/record.uri?eid=2-s2.0-85124161845&doi=10.1016%2fj.jretconser.2022.102956&partnerID=40&md5=a81fefb74e03c514ced5e0ab514cd8e1	Smartphone applications for health-oriented purposes, or mHealth apps (MHAs), represent a growing opportunity to improve efficiency and sustainability in both national health systems and individual citizens' self-management of their health condition. However, little is known about how to build user engagement with MHAs to avoid user dropout and encourage their long-term loyalty and advocacy of MH…	Advocacy; Enjoyment; Functional value; Loyalty; mHealth apps; Networking; Social image; User engagement	health care; health status; network analysis; social behavior; technology adoption	Akdim K., Casalo L.V., Flavian C., The role of utilitarian and hedonic aspects in the continuance intention to use social mobile apps, J. Retailing Consum. Serv., 66, (2022); Alalwan A.A., Baabdullah A.M., Rana N.P., Tamilmani K., Dwivedi Y.K., Examining adoption of mobile internet in Saudi Arabia: extending TAM with perceived enjoyment, innovativeness and trust, Technol. Soc., 55, pp. 100-110, (…		Elsevier Ltd	13.1	Theme 5: health care, mhealth, india, internet of things	health care, mhealth, india, internet of things	Q1	5	136	0.2703	0.3017	47.4706	0.1609	0	0.5	0.6316	0.2105	5.3761	0.3943	0.0957	0.3027	0.015	0.3605	Q3: Niche / Transient	Q4: Frontier / Niche
Blom A.; Lange F.; Hess R.L., Jr	Omnichannel-based promotions’ effects on purchase behavior and brand image	2017	Journal of Retailing and Consumer Services	76	10.1016/j.jretconser.2017.08.008	https://www.scopus.com/inward/record.uri?eid=2-s2.0-85028305773&doi=10.1016%2fj.jretconser.2017.08.008&partnerID=40&md5=03b87d9cefe77f3ed78e59e0b4c2cc54	This paper examines the effects of utilizing consumers’ digital shopping traces when designing in-store promotions on purchase behavior and brand image. In two experimental studies with 526 and 550 espondents, the authors examine the effects of omnichannel-based promotions (e.g. using digital shopping trace to offer a promotion when the consumer enters the physical store) in two different product…	Brand image; Omnichannel retailing; Promotion; Purchase behavior	consumption behavior; electronic commerce; market development; media role; retailing; technology adoption; telecommunication	Arnoud E.J., Price L.L., Zinkhan G.M., Consumers, (2002); Aruna S., Santhi P., Impulse purchase behavior among generation-Y, IUP J. Mark. Manag., 14, 1, pp. 21-38, (2015); Beck N., Rygl D., Categorization of multiple channel retailing in Multi-, Cross-, and Omni-channel retailing for retailers and retailing, J. Retail. Consum. Serv., 27, pp. 170-178, (2015); Bell D.R., Corsten D., Knox G., From p…		Elsevier Ltd	13.1	Theme 10: retailing, mobile phone, shopping activity, social influence	retailing, mobile phone, shopping activity, social influence	Q1	10	90	0.5901	0.2244	68.1556	0.3416	0	0.5	0.0526	0.0175	4.2725	0	0.1463	0.8713	0.0249	0.75	Q1: Core / Established	Q1: Emerging / Growth
Rese A.; Ganster L.; Baier D.	Chatbots in retailers’ customer communication: How to measure their acceptance?	2020	Journal of Retailing and Consumer Services	150	10.1016/j.jretconser.2020.102176	https://www.scopus.com/inward/record.uri?eid=2-s2.0-85086591217&doi=10.1016%2fj.jretconser.2020.102176&partnerID=40&md5=af3c9259879f038ff2aed735cd169d1c	Currently, online retailers evaluate whether chatbots—software programs that interact with users using natural languages—could improve their customers' satisfaction. In a retail context, chatbots allow humans to pose shopping-related questions and receive answers in natural language without waiting for a salesperson or using other automated communication forms. However, until now, it has been unc…		Germany; automation; communication; consumption behavior; electronic commerce; hedonic analysis; information and communication technology; retailing; social network; technology adoption	Araujo T., Living up to the chatbot hype: the influence of anthropomorphic design cues and communicative agency framing on conversational agent and company perceptions, Comput. Hum. Behav., 85, pp. 183-189, (2018); Backhaus K., Awan A., The paradigm shift in customer analysis: marketing or IT-driven?, The Art of Structuring, pp. 337-349, (2019); Baier D., Rese A., Roglinger M., Conversational use…		Elsevier Ltd	13.1	Theme 10: retailing, mobile phone, shopping activity, social influence	retailing, mobile phone, shopping activity, social influence	Q1	10	90	0.5901	0.2244	68.1556	0.3416	0	0.5	0.0526	0.0175	4.2725	0	0.1463	0.8713	0.0249	0.75	Q1: Core / Established	Q1: Emerging / Growth
Gupta A.; Arora N.	Understanding determinants and barriers of mobile shopping adoption using behavioral reasoning theory	2017	Journal of Retailing and Consumer Services	177	10.1016/j.jretconser.2016.12.012	https://www.scopus.com/inward/record.uri?eid=2-s2.0-85007442814&doi=10.1016%2fj.jretconser.2016.12.012&partnerID=40&md5=f223439fe6a1bba8d8bf841ee92bab38	Technology has transformed the way retail business is done with leading players shifting to mobile specific platforms. The purpose of this study is to examine the mobile shopping adoption using a novel approach of behavioral reasoning theory, which aims to test the relative influence of reasons for, and importance of reasons against adoption of mobile shopping among Indian consumers. The hypothes…	Barriers to adoption; Behavioral reasoning theory; Innovation adoption; Mobile shopping	India; consumption behavior; innovation; shopping activity; technology adoption; theory	Aboelmaged M., Gebba T.R., Mobile banking adoption: an examination of technology acceptance model and theory of planned behavior, Int. J. Bus. Res. Dev., 2, 1, pp. 35-50, (2013); Agrebi S., Jallais J., Explain the intention to use smartphones for mobile shopping, J. Retail. Consum. Serv., 22, pp. 16-23, (2015); Ajzen I., From Intentions to Actions: a Theory of Planned Behavior, pp. 11-39, (1985);…		Elsevier Ltd	13.1	Theme 5: health care, mhealth, india, internet of things	health care, mhealth, india, internet of things	Q1	5	136	0.2703	0.3017	47.4706	0.1609	0	0.5	0.6316	0.2105	5.3761	0.3943	0.0957	0.3027	0.015	0.3605	Q3: Niche / Transient	Q4: Frontier / Niche
Gelderman C.J.; Ghijsen P.W.; van Diemen R.	Choosing self-service technologies or interpersonal services-The impact of situational factors and technology-related attitudes	2011	Journal of Retailing and Consumer Services	108	10.1016/j.jretconser.2011.06.003	https://www.scopus.com/inward/record.uri?eid=2-s2.0-79960893196&doi=10.1016%2fj.jretconser.2011.06.003&partnerID=40&md5=c3c75eca0d10b151bfeb679bfe661d3b	Many companies have introduced self-service technologies (SSTs) although not every customer wants to use or is able to use new technologies. This study aims to explain the actual use of SSTs by analysing a framework based on antecedents derived from the social cognitive theory, such as role clarity, perceived crowdedness, and need for interaction, and technology readiness dimensions.Survey data w…	Need for interaction; Perceived crowdedness; Role clarity; Self-service technologies; Technology readiness	cognition; consumption behavior; knowledge; social behavior; technology adoption	Anselmsson J., Customer-Perceived Service Quality and Technology-Based Self-Service, (2001); Auh S., Bell S.J., McLeod C.S., Shih E., Co-production and customer loyalty in financial services, Journal of Retailing, 83, 3, pp. 359-370, (2007); Bitner M.J., Brown S.W., Meuter M.L., Technology infusion in service encounters, Journal of the Academy of Marketing Science, 28, 1, pp. 138-149, (2000); Bit…			13.1	Theme 8: social media, social networking (online), knowledge, psychology	social media, social networking (online), knowledge, psychology	Q1	8	112	0.5845	0.1818	113.589	0.7384	0	0.5	0.2083	0.0694	5.2199	0.3385	0.096	0.3056	0.0183	0.4931	Q1: Core / Established	Q2: Mature / Potential
Wagner G.; Schramm-Klein H.; Steinmann S.	Consumers' attitudes and intentions toward Internet-enabled TV shopping	2017	Journal of Retailing and Consumer Services	36	10.1016/j.jretconser.2016.01.010	https://www.scopus.com/inward/record.uri?eid=2-s2.0-84954287893&doi=10.1016%2fj.jretconser.2016.01.010&partnerID=40&md5=1445cf2b681ba3023e26de2824ce1089	An increasing number of households are equipped with Internet-enabled televisions (IETVs) that yield opportunities for online activities. This research contributes by investigating the motivational factors of consumers’ attitudes and intentions toward IETV shopping. A quasi-experimental study in the environmental context of a living room was designed to explore IETV shopping behavior. Findings in…	E-Tailing; Electronic channel; Internet-enabled TV commerce; Online TV shopping; Task-environment-fit	consumption behavior; electronic commerce; hedonic analysis; Internet; retailing; shopping activity; technology adoption; television	Arnett D.B., German S.D., Hunt S.D., The identity salience model of relationship marketing success: the case of nonprofit marketing, J. Mark., 67, 2, pp. 89-105, (2003); Arnold M.J., Reynolds K.E., Hedonic shopping motivations, J. Retail., 79, 2, pp. 77-95, (2003); Badrinarayanan V., Becerra E.P., Madhavaram S., Influence of congruity in store-attribute dimensions and self-image on purchase inten…		Elsevier Ltd	13.1	Theme 10: retailing, mobile phone, shopping activity, social influence	retailing, mobile phone, shopping activity, social influence	Q1	10	90	0.5901	0.2244	68.1556	0.3416	0	0.5	0.0526	0.0175	4.2725	0	0.1463	0.8713	0.0249	0.75	Q1: Core / Established	Q1: Emerging / Growth
Faqih K.M.S.	An empirical analysis of factors predicting the behavioral intention to adopt Internet shopping technology among non-shoppers in a developing country context: Does gender matter?	2016	Journal of Retailing and Consumer Services	159	10.1016/j.jretconser.2016.01.016	https://www.scopus.com/inward/record.uri?eid=2-s2.0-84961832102&doi=10.1016%2fj.jretconser.2016.01.016&partnerID=40&md5=6ea92f2879b38a5bf863eb3ddc1909c5	Motivated by the lack of knowledge of what factors deterring Internet users from adopting the Internet shopping in developing cultures, this investigation is therefore intended to underline the possible factors responsible for their deterrence. To achieve this objective, a model was proposed by involving factors established in literature as key potential drivers for predicating individuals' behav…	Compatibility; Gender; Internet Shopping; Internet shopping anxiety; Online non-shoppers; Social influence	developing world; empirical analysis; gender; Internet; retailing; shopping activity; technology adoption	Abbad M., Abbad R., Saleh M., Limitations of E-commerce in developing countries: Jordan case, education, business and society, Contemp. Middle East. Issues, 4, 4, pp. 280-291, (2011); Abu-Shamaa R., Abu-Shanab E., Factors influencing the intention to buy from online stores: an empirical study in Jordan., Proceedings of the 2015 IEEE 8th GCC Conference and Exhibition (GCCCE), pp. 1-6, (2015); Acil…		Elsevier Ltd	13.1	Theme 10: retailing, mobile phone, shopping activity, social influence	retailing, mobile phone, shopping activity, social influence	Q1	10	90	0.5901	0.2244	68.1556	0.3416	0	0.5	0.0526	0.0175	4.2725	0	0.1463	0.8713	0.0249	0.75	Q1: Core / Established	Q1: Emerging / Growth
Kacker M.; Perrigot R.	Retailer use of a professional social media network: Insights from franchising	2016	Journal of Retailing and Consumer Services	22	10.1016/j.jretconser.2016.01.020	https://www.scopus.com/inward/record.uri?eid=2-s2.0-84961773461&doi=10.1016%2fj.jretconser.2016.01.020&partnerID=40&md5=6660e5074ce5eb302f524cc46e23aebe	The adoption and use of a professional social media network by franchise chains is the focus of this paper. We draw on resource-based theory, institutional economic theories of incentives and externalities and multidisciplinary literatures on franchising, innovation adoption and interorganizational communication to link (i) franchisor characteristics and partnering strategies to the adoption and …	Business marketing; Franchising; LinkedIn; Marketing communications; Organizational Innovation Adoption; Partnering strategies; Retailing; Social media	business; innovation; marketing; retailing; social media; social network; technology adoption	Abrahamson E., Rosenkopf L., Institutional and competitive bandwagons: using mathematical modeling as a tool to explore innovation diffusion, Acad. Manag. Rev., 18, 3, pp. 487-517, (1993); Aral S., Dellarocas C., Godes D., Introduction to the special issue - social media and business transformation: a framework for research, Inf. Syst. Res., 24, 1, pp. 3-13, (2013); Barney J.B., Firm resources an…		Elsevier Ltd	13.1	Theme 8: social media, social networking (online), knowledge, psychology	social media, social networking (online), knowledge, psychology	Q1	8	112	0.5845	0.1818	113.589	0.7384	0	0.5	0.2083	0.0694	5.2199	0.3385	0.096	0.3056	0.0183	0.4931	Q1: Core / Established	Q2: Mature / Potential
Demirkan H.; Spohrer J.	Developing a framework to improve virtual shopping in digital malls with intelligent self-service systems	2014	Journal of Retailing and Consumer Services	90	10.1016/j.jretconser.2014.02.012	https://www.scopus.com/inward/record.uri?eid=2-s2.0-84906057451&doi=10.1016%2fj.jretconser.2014.02.012&partnerID=40&md5=e33ccf2f0706ae73e606cf58fd7d9829	Growing movements to urban places, increasing unemployment, decreasing buying power, rising real estate cost and demanding consumers for convenience and price are creating challenges for retailers. This paper reviews a sample list of retail channels, and proposes a systematic framework for conceptualizing the data-driven, and mobile- and cloud-enabled intelligent self-service systems to improve v…	Self-service systems; Service innovation; Virtual shopping	innovation; retailing; shopping activity; technology adoption; virtual reality	Allen P., Higgins S., McRaie P., Schlaman H., Service Orientaton: Winning Strategy and Best Practices, (2010); Benenson R., Petti S., Fraichard T., Parent M., Towards urban driverless vehicles, Int. J. Veh. Auton. Syst., 6, 1, pp. 4-23, (2008); Atkinson R.D., The Past And Future Of America[U+05F3]s Economy: Long Waves Of Innovation That Power Cycles Of Growth, (2005); Avalos J., (2011); Bethlahmy…		Elsevier Ltd	13.1	Theme 10: retailing, mobile phone, shopping activity, social influence	retailing, mobile phone, shopping activity, social influence	Q1	10	90	0.5901	0.2244	68.1556	0.3416	0	0.5	0.0526	0.0175	4.2725	0	0.1463	0.8713	0.0249	0.75	Q1: Core / Established	Q1: Emerging / Growth
[truncated: 2,762 more rows]
