# Supplementary material for: Technology Readiness and Acceptance (2000–2024): A Bibliometric and Systematic Review toward the TRAS Framework
Source: Research Square preprint supplement (doi:10.21203/rs.3.rs-8359750/v1), 2025-12-19
Supplement: Supplementary file 2 [file a06da5b6d8cd048f671bd38a.xlsx]

## Sheet: Ethics_Lag
Year	Adoption	Ethics
2000	0.777778	0.111111
2001	1	0.142857
2002	1	0.0416667
2003	0.851852	0.222222
2004	0.695652	0.217391
2005	0.875	0.125
2006	0.848485	0.0909091
2007	0.810811	0.189189
2008	0.877551	0.122449
2009	0.746032	0.111111
2010	0.630952	0.190476
2011	0.613333	0.16
2012	0.541667	0.229167
2013	0.527027	0.216216
2014	0.646552	0.172414
2015	0.51145	0.160305
2016	0.563492	0.142857
2017	0.404494	0.168539
2018	0.517647	0.176471
2019	0.507177	0.22488
2020	0.523297	0.218638
2021	0.490506	0.237342
2022	0.450425	0.235127
2023	0.540609	0.286802
2024	0.480519	0.272727

## Sheet: Method_Theory_Coupling
Epoch	Method	Theory
E3_2017_2024	Survey	None
E3_2017_2024	Qualitative	None
E2_2009_2016	Unclassified	TAM
E3_2017_2024	Unclassified	TAM
E3_2017_2024	Unclassified	None
E3_2017_2024	Unclassified	None
E2_2009_2016	Unclassified	TRI
E3_2017_2024	Unclassified	None
E3_2017_2024	Survey	TRI
E3_2017_2024	Unclassified	None
E3_2017_2024	Unclassified	None
E2_2009_2016	Unclassified	TAM
E2_2009_2016	Unclassified	TAM
E3_2017_2024	Unclassified	None
E3_2017_2024	Unclassified	None
E3_2017_2024	Survey	None
E3_2017_2024	Qualitative	None
E2_2009_2016	Survey	None
E2_2009_2016	Unclassified	None
E2_2009_2016	Unclassified	None
E1_2000_2008	Survey	TAM
E2_2009_2016	Unclassified	None
E2_2009_2016	Survey	UTAUT
E3_2017_2024	CB_SEM	TAM
E3_2017_2024	Survey	TAM
E1_2000_2008	Unclassified	None
E3_2017_2024	PLS_SEM	TAM
E3_2017_2024	Survey	TAM
E3_2017_2024	Survey	TRI
E2_2009_2016	Qualitative	None
E3_2017_2024	Unclassified	None
E3_2017_2024	Qualitative	None
E3_2017_2024	Survey	TAM
E1_2000_2008	Survey	TAM
E1_2000_2008	Survey	None
E1_2000_2008	Qualitative	None
E1_2000_2008	Unclassified	TAM
E2_2009_2016	Unclassified	TRI
E3_2017_2024	Unclassified	None
E3_2017_2024	Qualitative	TAM
E3_2017_2024	Unclassified	None
E3_2017_2024	PLS_SEM	TRI
E2_2009_2016	Survey	None
E2_2009_2016	Unclassified	None
E2_2009_2016	Unclassified	UTAUT
E1_2000_2008	CB_SEM	None
E1_2000_2008	Unclassified	TAM
E3_2017_2024	Unclassified	None
E2_2009_2016	Unclassified	None
E3_2017_2024	Unclassified	None
E3_2017_2024	CB_SEM	None
E2_2009_2016	Unclassified	None
E2_2009_2016	Unclassified	None
E3_2017_2024	Survey	TAM
E2_2009_2016	Unclassified	None
E2_2009_2016	Unclassified	TAM
E3_2017_2024	Unclassified	TRI
E2_2009_2016	Unclassified	TAM
E2_2009_2016	Survey	TAM
E1_2000_2008	Unclassified	None
E3_2017_2024	Unclassified	None
E3_2017_2024	Unclassified	None
E3_2017_2024	Unclassified	None
E3_2017_2024	Qualitative	None
E3_2017_2024	Unclassified	None
E2_2009_2016	Unclassified	None
E2_2009_2016	Survey	None
E3_2017_2024	Survey	None
E3_2017_2024	Unclassified	None
E3_2017_2024	PLS_SEM	TAM
E3_2017_2024	Survey	TAM
E3_2017_2024	Survey	None
E3_2017_2024	Survey	None
E3_2017_2024	Survey	TAM
E2_2009_2016	Survey	TAM
E3_2017_2024	Unclassified	None
E3_2017_2024	Unclassified	None
E2_2009_2016	Unclassified	None
E2_2009_2016	Unclassified	None
E3_2017_2024	Unclassified	UTAUT
E3_2017_2024	Survey	TRI
E2_2009_2016	Survey	TRI
E3_2017_2024	PLS_SEM	TAM
E3_2017_2024	PLS_SEM	TAM
E3_2017_2024	PLS_SEM	UTAUT
E3_2017_2024	Survey	TAM
E3_2017_2024	Survey	UTAUT
E3_2017_2024	Unclassified	TAM
E3_2017_2024	Survey	TAM
E3_2017_2024	Survey	TAM
E3_2017_2024	Qualitative	TAM
E2_2009_2016	Survey	None
E2_2009_2016	Survey	None
E2_2009_2016	Survey	TAM
E2_2009_2016	Unclassified	TAM
E2_2009_2016	Survey	TAM
E3_2017_2024	Unclassified	UTAUT
E3_2017_2024	Unclassified	UTAUT
E3_2017_2024	Survey	TAM
E3_2017_2024	Unclassified	UTAUT
E3_2017_2024	Unclassified	None
E3_2017_2024	Survey	None
E3_2017_2024	Survey	None
E3_2017_2024	Unclassified	None
E3_2017_2024	Unclassified	None
E2_2009_2016	Unclassified	None
E2_2009_2016	Survey	None
E3_2017_2024	Unclassified	TAM
E3_2017_2024	Unclassified	None
E3_2017_2024	Unclassified	TAM
E1_2000_2008	Unclassified	TAM
E3_2017_2024	Unclassified	None
E3_2017_2024	Unclassified	None
E3_2017_2024	Unclassified	None
E3_2017_2024	Unclassified	None
E2_2009_2016	Unclassified	None
E2_2009_2016	Qualitative	TAM
E2_2009_2016	Qualitative	None
E3_2017_2024	Unclassified	None
E3_2017_2024	Unclassified	None
E3_2017_2024	Unclassified	None
E3_2017_2024	Unclassified	None
E2_2009_2016	Unclassified	None
E3_2017_2024	Unclassified	None
E3_2017_2024	Unclassified	UTAUT
E2_2009_2016	Unclassified	None
E3_2017_2024	Unclassified	TAM
E2_2009_2016	Unclassified	None
E2_2009_2016	Survey	None
E2_2009_2016	Unclassified	None
E2_2009_2016	Unclassified	None
E2_2009_2016	Unclassified	None
E2_2009_2016	Survey	TAM
E3_2017_2024	ML_NLP	None
E3_2017_2024	Unclassified	None
E3_2017_2024	Survey	None
E3_2017_2024	Unclassified	None
E3_2017_2024	Unclassified	None
E3_2017_2024	Survey	None
E3_2017_2024	Unclassified	None
E2_2009_2016	Survey	None
E3_2017_2024	Unclassified	None
E2_2009_2016	Qualitative	None
E3_2017_2024	PLS_SEM	None
E3_2017_2024	Survey	None
E3_2017_2024	Unclassified	UTAUT
E3_2017_2024	Survey	TAM
E2_2009_2016	Unclassified	TAM
E2_2009_2016	Qualitative	None
E3_2017_2024	Qualitative	None
E3_2017_2024	Unclassified	None
E1_2000_2008	Unclassified	None
E1_2000_2008	Survey	None
E1_2000_2008	Survey	None
E3_2017_2024	Survey	None
E3_2017_2024	Unclassified	None
E3_2017_2024	Unclassified	None
E1_2000_2008	Survey	TAM
E3_2017_2024	Unclassified	None
E3_2017_2024	Survey	TAM
E3_2017_2024	Survey	None
E3_2017_2024	Qualitative	UTAUT
E2_2009_2016	Survey	TAM
E3_2017_2024	Qualitative	TAM
E3_2017_2024	Survey	TAM
E3_2017_2024	Survey	TAM
E3_2017_2024	Survey	None
E3_2017_2024	PLS_SEM	UTAUT
E3_2017_2024	Survey	UTAUT
E3_2017_2024	Unclassified	None
E3_2017_2024	Unclassified	None
E3_2017_2024	Unclassified	None
E3_2017_2024	Unclassified	TAM
E3_2017_2024	Unclassified	TRI
E3_2017_2024	Survey	TAM
E3_2017_2024	Unclassified	TAM
E2_2009_2016	Unclassified	None
E2_2009_2016	Survey	UTAUT
E2_2009_2016	Survey	TAM
E2_2009_2016	Unclassified	None
E1_2000_2008	Unclassified	TAM
E3_2017_2024	Unclassified	None
E2_2009_2016	Unclassified	UTAUT
E3_2017_2024	Unclassified	None
E3_2017_2024	Unclassified	UTAUT
E2_2009_2016	Unclassified	TAM
E3_2017_2024	Unclassified	None
E1_2000_2008	Survey	None
E2_2009_2016	Unclassified	TAM
E3_2017_2024	Unclassified	None
E3_2017_2024	Qualitative	None
E3_2017_2024	Unclassified	None
E3_2017_2024	Unclassified	None
E3_2017_2024	Survey	None
E3_2017_2024	Qualitative	None
E3_2017_2024	Unclassified	None
E3_2017_2024	Survey	None
E3_2017_2024	Survey	TRI
E3_2017_2024	Survey	None
E2_2009_2016	Unclassified	None
E2_2009_2016	Unclassified	None
E2_2009_2016	Unclassified	None
E3_2017_2024	Survey	UTAUT
E3_2017_2024	Unclassified	None
E2_2009_2016	Unclassified	TAM
E2_2009_2016	Unclassified	TAM
E2_2009_2016	Survey	TAM
E2_2009_2016	Survey	TAM
E2_2009_2016	Unclassified	None
E2_2009_2016	Unclassified	TAM
E2_2009_2016	Survey	TAM
E2_2009_2016	Unclassified	None
E3_2017_2024	Unclassified	None
E3_2017_2024	Qualitative	None
E3_2017_2024	Unclassified	None
E3_2017_2024	Survey	None
E3_2017_2024	Unclassified	None
E3_2017_2024	Unclassified	None
E3_2017_2024	Unclassified	None
E3_2017_2024	Unclassified	None
E2_2009_2016	Unclassified	TAM
E3_2017_2024	Unclassified	None
E3_2017_2024	Survey	None
E3_2017_2024	Survey	None
E3_2017_2024	Qualitative	None
E3_2017_2024	PLS_SEM	UTAUT
E3_2017_2024	Unclassified	None
E3_2017_2024	Unclassified	None
E3_2017_2024	Unclassified	None
E3_2017_2024	Survey	None
E3_2017_2024	Survey	None
E3_2017_2024	Qualitative	None
E3_2017_2024	Unclassified	UTAUT
E3_2017_2024	Unclassified	None
E3_2017_2024	Unclassified	None
E3_2017_2024	Unclassified	None
E3_2017_2024	Unclassified	None
E3_2017_2024	Survey	None
E3_2017_2024	Unclassified	None
E3_2017_2024	Unclassified	None
E3_2017_2024	Unclassified	None
E3_2017_2024	Survey	None
E3_2017_2024	Survey	UTAUT
E3_2017_2024	Survey	None
E3_2017_2024	Unclassified	None
E3_2017_2024	Survey	None
E3_2017_2024	PLS_SEM	None
E2_2009_2016	Survey	TAM3
E3_2017_2024	Qualitative	None
E3_2017_2024	Unclassified	None
E3_2017_2024	Unclassified	None
E3_2017_2024	Unclassified	TAM
E3_2017_2024	PLS_SEM	None
E2_2009_2016	Survey	TRI
E3_2017_2024	Unclassified	None
E2_2009_2016	Survey	None
E2_2009_2016	Unclassified	None
E2_2009_2016	Unclassified	None
E2_2009_2016	Unclassified	None
E3_2017_2024	Unclassified	TAM
E3_2017_2024	PLS_SEM	TRI
E3_2017_2024	Survey	TRI
E3_2017_2024	Survey	TRI
E3_2017_2024	Unclassified	TAM
E3_2017_2024	Unclassified	None
E3_2017_2024	Unclassified	None
E3_2017_2024	Unclassified	TRI
E3_2017_2024	Unclassified	UTAUT
E3_2017_2024	Survey	TAM
E3_2017_2024	Survey	TRI
E3_2017_2024	Unclassified	None
E3_2017_2024	Unclassified	TAM
E3_2017_2024	Unclassified	TAM
E3_2017_2024	Unclassified	UTAUT
E3_2017_2024	Unclassified	UTAUT
E3_2017_2024	Unclassified	None
E3_2017_2024	Unclassified	UTAUT
E3_2017_2024	Survey	TAM
E3_2017_2024	Unclassified	TRI
E3_2017_2024	Unclassified	None
E3_2017_2024	Survey	TAM
E3_2017_2024	Unclassified	None
E3_2017_2024	Unclassified	None
E3_2017_2024	Unclassified	TAM
E2_2009_2016	Unclassified	TAM
E3_2017_2024	Survey	UTAUT
E3_2017_2024	Unclassified	TAM
E3_2017_2024	Unclassified	TAM
E3_2017_2024	PLS_SEM	TRI
E3_2017_2024	Survey	TRI
E3_2017_2024	Qualitative	TRI
E3_2017_2024	Unclassified	TAM
E3_2017_2024	Unclassified	TAM
E3_2017_2024	Unclassified	UTAUT
E3_2017_2024	Survey	None
E3_2017_2024	Survey	TAM
E3_2017_2024	Unclassified	TAM
E3_2017_2024	Survey	TAM
E2_2009_2016	Survey	TAM
E2_2009_2016	Survey	TAM
E2_2009_2016	Unclassified	TAM
E2_2009_2016	Unclassified	UTAUT
E3_2017_2024	PLS_SEM	TRI
E2_2009_2016	Unclassified	TAM
E2_2009_2016	Unclassified	TAM
E1_2000_2008	Survey	TAM
E3_2017_2024	Unclassified	None
E3_2017_2024	Survey	None
E3_2017_2024	Unclassified	None
E3_2017_2024	Unclassified	None
E3_2017_2024	Unclassified	None
E3_2017_2024	Survey	None
E3_2017_2024	Unclassified	None
E3_2017_2024	Survey	None
E3_2017_2024	Qualitative	None
E3_2017_2024	Unclassified	None
E3_2017_2024	Unclassified	None
E3_2017_2024	Unclassified	None
E3_2017_2024	Unclassified	None
E3_2017_2024	Qualitative	None
E3_2017_2024	Survey	None
E3_2017_2024	Unclassified	None
E3_2017_2024	Survey	None
E3_2017_2024	Unclassified	None
E3_2017_2024	Unclassified	None
E3_2017_2024	Unclassified	None
E2_2009_2016	Unclassified	None
E2_2009_2016	Unclassified	None
E2_2009_2016	Unclassified	None
E2_2009_2016	Qualitative	None
E2_2009_2016	Survey	None
E3_2017_2024	Unclassified	None
E3_2017_2024	Survey	None
E3_2017_2024	Unclassified	None
E2_2009_2016	Survey	None
E3_2017_2024	Unclassified	None
E3_2017_2024	Unclassified	None
E3_2017_2024	Qualitative	None
E3_2017_2024	Unclassified	None
E3_2017_2024	Unclassified	None
E3_2017_2024	Qualitative	None
E3_2017_2024	Unclassified	None
E3_2017_2024	Unclassified	None
E3_2017_2024	Survey	None
E3_2017_2024	Unclassified	None
E3_2017_2024	Unclassified	None
E3_2017_2024	Survey	None
E3_2017_2024	Qualitative	None
E3_2017_2024	Unclassified	None
E3_2017_2024	Unclassified	None
E3_2017_2024	Unclassified	None
E3_2017_2024	Survey	None
E3_2017_2024	Qualitative	None
E3_2017_2024	Unclassified	None
E3_2017_2024	Survey	None
E3_2017_2024	Unclassified	None
E3_2017_2024	Unclassified	None
E3_2017_2024	Unclassified	None
E3_2017_2024	Unclassified	None
E3_2017_2024	Qualitative	None
E3_2017_2024	Unclassified	None
E3_2017_2024	Survey	None
E3_2017_2024	Unclassified	None
E3_2017_2024	Unclassified	None
E3_2017_2024	Unclassified	None
E3_2017_2024	Unclassified	None
E3_2017_2024	Unclassified	None
E3_2017_2024	Unclassified	None
E3_2017_2024	Unclassified	None
E3_2017_2024	Unclassified	None
E3_2017_2024	ML_NLP	None
E3_2017_2024	Unclassified	None
E3_2017_2024	Qualitative	None
E3_2017_2024	Unclassified	None
E3_2017_2024	Unclassified	None
E3_2017_2024	Unclassified	None
E3_2017_2024	Unclassified	None
E3_2017_2024	Unclassified	None
E3_2017_2024	Unclassified	None
E3_2017_2024	Qualitative	None
E3_2017_2024	Unclassified	None
E3_2017_2024	Unclassified	None
E3_2017_2024	Unclassified	None
E3_2017_2024	Unclassified	None
E3_2017_2024	Unclassified	None
E3_2017_2024	Unclassified	None
E3_2017_2024	Unclassified	None
E3_2017_2024	Unclassified	None
E3_2017_2024	Survey	None
E3_2017_2024	Unclassified	TAM
E3_2017_2024	Qualitative	None
E3_2017_2024	Unclassified	None
E3_2017_2024	Unclassified	None
E3_2017_2024	Unclassified	None
E3_2017_2024	Unclassified	None
E3_2017_2024	Survey	None
E3_2017_2024	Survey	None
E3_2017_2024	Survey	None
E3_2017_2024	PLS_SEM	None
E2_2009_2016	Unclassified	None
E3_2017_2024	Survey	None
E3_2017_2024	Unclassified	None
E3_2017_2024	Unclassified	None
E3_2017_2024	ML_NLP	None
E3_2017_2024	Unclassified	None
E3_2017_2024	Unclassified	None
E3_2017_2024	Unclassified	None
E3_2017_2024	Unclassified	None
E3_2017_2024	Unclassified	None
E3_2017_2024	Survey	None
E3_2017_2024	Survey	None
E3_2017_2024	Survey	None
E3_2017_2024	Unclassified	None
E3_2017_2024	Unclassified	None
E3_2017_2024	Unclassified	None
E3_2017_2024	Unclassified	None
E3_2017_2024	Unclassified	None
E3_2017_2024	Unclassified	None
E3_2017_2024	ML_NLP	None
E3_2017_2024	Unclassified	None
E3_2017_2024	Unclassified	None
E3_2017_2024	Unclassified	None
E3_2017_2024	Unclassified	None
E3_2017_2024	Survey	None
E3_2017_2024	Qualitative	None
E3_2017_2024	Unclassified	None
E3_2017_2024	Unclassified	None
E3_2017_2024	Unclassified	None
E3_2017_2024	Qualitative	UTAUT
E3_2017_2024	Unclassified	None
E3_2017_2024	Unclassified	None
E3_2017_2024	Survey	None
E3_2017_2024	Unclassified	None
E3_2017_2024	Survey	None
E3_2017_2024	Unclassified	None
E3_2017_2024	Unclassified	None
E3_2017_2024	Unclassified	None
E3_2017_2024	Survey	None
E3_2017_2024	Qualitative	None
E3_2017_2024	Unclassified	None
E3_2017_2024	Unclassified	None
E3_2017_2024	Unclassified	None
E3_2017_2024	Qualitative	None
E3_2017_2024	Qualitative	None
E3_2017_2024	Unclassified	None
E3_2017_2024	Survey	None
E3_2017_2024	Unclassified	None
E3_2017_2024	Survey	None
E3_2017_2024	Unclassified	None
E3_2017_2024	Unclassified	None
E3_2017_2024	Unclassified	None
E3_2017_2024	Unclassified	None
E3_2017_2024	Unclassified	None
E3_2017_2024	Unclassified	None
E3_2017_2024	Unclassified	None
E3_2017_2024	Unclassified	None
E3_2017_2024	Unclassified	None
E3_2017_2024	Unclassified	None
E3_2017_2024	Qualitative	None
E3_2017_2024	Unclassified	None
E3_2017_2024	Qualitative	None
E3_2017_2024	Unclassified	None
E3_2017_2024	Unclassified	None
E3_2017_2024	Unclassified	None
E3_2017_2024	Unclassified	None
E3_2017_2024	Unclassified	None
E3_2017_2024	Unclassified	None
E3_2017_2024	Qualitative	None
E3_2017_2024	Unclassified	None
E3_2017_2024	Unclassified	None
E3_2017_2024	Unclassified	None
E3_2017_2024	Unclassified	TRI
E3_2017_2024	Unclassified	None
E3_2017_2024	Unclassified	None
E3_2017_2024	Survey	None
E3_2017_2024	Unclassified	None
E3_2017_2024	Unclassified	None
E3_2017_2024	Unclassified	None
E3_2017_2024	Unclassified	None
E3_2017_2024	Unclassified	None
E3_2017_2024	Unclassified	None
E3_2017_2024	Unclassified	None
E3_2017_2024	Unclassified	None
E3_2017_2024	Qualitative	None
E3_2017_2024	Unclassified	None
E3_2017_2024	Unclassified	None
E3_2017_2024	Survey	None
E3_2017_2024	Unclassified	None
E3_2017_2024	Unclassified	None
E3_2017_2024	Unclassified	None
E3_2017_2024	Unclassified	None
E3_2017_2024	Unclassified	None
E3_2017_2024	PLS_SEM	None
E3_2017_2024	Unclassified	None
E3_2017_2024	Survey	None
E3_2017_2024	PLS_SEM	None
E3_2017_2024	Survey	None
E3_2017_2024	Unclassified	None
E3_2017_2024	Unclassified	None
E3_2017_2024	Survey	None
E3_2017_2024	Unclassified	None
E3_2017_2024	Unclassified	None
E3_2017_2024	Unclassified	None
E3_2017_2024	Qualitative	None
E3_2017_2024	Survey	None
E3_2017_2024	Unclassified	None
E3_2017_2024	Survey	None
E3_2017_2024	Unclassified	None
E3_2017_2024	Unclassified	None
E2_2009_2016	Unclassified	None
E2_2009_2016	Unclassified	None
E2_2009_2016	ML_NLP	None
E2_2009_2016	Unclassified	None
E2_2009_2016	Unclassified	None
E2_2009_2016	Unclassified	None
E2_2009_2016	Qualitative	None
E2_2009_2016	Unclassified	None
E2_2009_2016	Qualitative	None
E2_2009_2016	Unclassified	None
E2_2009_2016	Unclassified	None
E2_2009_2016	Unclassified	None
E2_2009_2016	Unclassified	None
E2_2009_2016	Unclassified	None
E2_2009_2016	Unclassified	None
E2_2009_2016	Unclassified	None
E2_2009_2016	Unclassified	None
E2_2009_2016	Unclassified	None
E2_2009_2016	Qualitative	None
E2_2009_2016	Unclassified	None
E2_2009_2016	Qualitative	None
E2_2009_2016	Unclassified	None
E2_2009_2016	Survey	None
E2_2009_2016	Qualitative	None
E2_2009_2016	Survey	None
E2_2009_2016	Unclassified	None
E2_2009_2016	Survey	None
E2_2009_2016	Unclassified	None
E2_2009_2016	Unclassified	None
E2_2009_2016	Survey	None
E2_2009_2016	Unclassified	None
E2_2009_2016	Unclassified	None
E2_2009_2016	Unclassified	None
E2_2009_2016	Survey	None
E2_2009_2016	Unclassified	None
E2_2009_2016	Survey	None
E2_2009_2016	Unclassified	None
E2_2009_2016	Unclassified	None
E2_2009_2016	Survey	None
E2_2009_2016	Unclassified	None
E2_2009_2016	Unclassified	None
E2_2009_2016	Qualitative	None
E2_2009_2016	Survey	None
E2_2009_2016	Unclassified	None
E2_2009_2016	Qualitative	None
E3_2017_2024	CB_SEM	None
E3_2017_2024	Survey	None
E3_2017_2024	Survey	TRI
E2_2009_2016	Survey	None
E2_2009_2016	Unclassified	None
E2_2009_2016	Unclassified	None
E2_2009_2016	Unclassified	None
E2_2009_2016	Unclassified	None
E2_2009_2016	Qualitative	None
E2_2009_2016	Unclassified	None
E2_2009_2016	Unclassified	None
E2_2009_2016	Qualitative	None
E2_2009_2016	Unclassified	None
E2_2009_2016	Unclassified	None
E2_2009_2016	Unclassified	None
E2_2009_2016	Unclassified	None
E2_2009_2016	Unclassified	None
E2_2009_2016	Survey	None
E2_2009_2016	Unclassified	None
E3_2017_2024	Qualitative	None
E3_2017_2024	CB_SEM	TRI
E3_2017_2024	Survey	TRI
E2_2009_2016	Survey	None
E2_2009_2016	Unclassified	None
E3_2017_2024	Survey	None
E3_2017_2024	Qualitative	None
E3_2017_2024	Qualitative	None
E3_2017_2024	Unclassified	None
E2_2009_2016	Survey	None
E2_2009_2016	Qualitative	None
E3_2017_2024	Unclassified	None
E3_2017_2024	Survey	TAM
E3_2017_2024	Survey	None
E3_2017_2024	Unclassified	None
E3_2017_2024	Unclassified	UTAUT
E3_2017_2024	Unclassified	None
E3_2017_2024	Unclassified	None
E3_2017_2024	Unclassified	TAM
E3_2017_2024	Survey	None
E3_2017_2024	Unclassified	None
E3_2017_2024	Unclassified	UTAUT
E3_2017_2024	Unclassified	TAM
E3_2017_2024	Unclassified	None
E3_2017_2024	Survey	TAM
E3_2017_2024	Unclassified	TAM
E3_2017_2024	Survey	TAM
E3_2017_2024	PLS_SEM	TAM
E3_2017_2024	Survey	TAM
E3_2017_2024	ML_NLP	TAM
E3_2017_2024	Unclassified	None
E3_2017_2024	Survey	TAM
E3_2017_2024	Qualitative	None
E3_2017_2024	Survey	None
E3_2017_2024	PLS_SEM	TAM
E3_2017_2024	Survey	None
E3_2017_2024	Qualitative	TAM
E3_2017_2024	Unclassified	TAM
E3_2017_2024	CB_SEM	TAM
E3_2017_2024	Unclassified	UTAUT
E3_2017_2024	Unclassified	None
E3_2017_2024	Survey	None
E3_2017_2024	Unclassified	TRI
E3_2017_2024	Unclassified	None
E3_2017_2024	PLS_SEM	TAM
E3_2017_2024	Survey	TAM
E3_2017_2024	Unclassified	UTAUT
E3_2017_2024	Unclassified	TAM
E3_2017_2024	Unclassified	TAM
E3_2017_2024	Unclassified	None
E3_2017_2024	Survey	None
E3_2017_2024	Unclassified	None
E2_2009_2016	Unclassified	UTAUT
E2_2009_2016	Unclassified	None
E3_2017_2024	Unclassified	None
E2_2009_2016	Survey	TAM
E3_2017_2024	Survey	TRI
E2_2009_2016	Unclassified	None
E2_2009_2016	Unclassified	None
E3_2017_2024	Qualitative	None
E3_2017_2024	Unclassified	None
E3_2017_2024	Unclassified	TAM
E3_2017_2024	Qualitative	None
E2_2009_2016	Unclassified	None
E3_2017_2024	Qualitative	None
E3_2017_2024	Survey	None
E3_2017_2024	Qualitative	None
E3_2017_2024	Unclassified	None
E3_2017_2024	Survey	None
E3_2017_2024	Survey	TRI
E3_2017_2024	Survey	UTAUT
E3_2017_2024	Survey	None
E3_2017_2024	Unclassified	None
E3_2017_2024	Unclassified	TAM
E3_2017_2024	Unclassified	UTAUT
E3_2017_2024	Unclassified	None
E3_2017_2024	Survey	UTAUT
E3_2017_2024	Unclassified	None
E3_2017_2024	Unclassified	UTAUT
E2_2009_2016	Unclassified	TAM
E2_2009_2016	Survey	None
E2_2009_2016	Unclassified	TAM
E1_2000_2008	Unclassified	None
E2_2009_2016	Survey	None
E2_2009_2016	Qualitative	None
E3_2017_2024	Survey	TAM
E3_2017_2024	PLS_SEM	TAM
E3_2017_2024	Survey	TAM
E3_2017_2024	Unclassified	UTAUT
E3_2017_2024	Survey	TAM
E3_2017_2024	Survey	TAM
E3_2017_2024	Qualitative	TAM
E3_2017_2024	Survey	None
E2_2009_2016	Unclassified	TAM
E2_2009_2016	CB_SEM	TAM
E2_2009_2016	Survey	TAM
E3_2017_2024	Unclassified	None
E3_2017_2024	Survey	None
E3_2017_2024	Qualitative	None
E3_2017_2024	Survey	None
E3_2017_2024	Unclassified	None
E3_2017_2024	Unclassified	None
E3_2017_2024	Survey	None
E3_2017_2024	Survey	None
E3_2017_2024	Survey	None
E2_2009_2016	Unclassified	None
E2_2009_2016	Survey	None
E3_2017_2024	Unclassified	TRI
E3_2017_2024	CB_SEM	TAM
E3_2017_2024	Survey	TAM
E3_2017_2024	Survey	None
E3_2017_2024	Unclassified	None
E3_2017_2024	Unclassified	TAM
E3_2017_2024	Unclassified	TRI
E3_2017_2024	Unclassified	TAM
E3_2017_2024	Unclassified	TRI
E2_2009_2016	Survey	None
E2_2009_2016	Survey	None
E3_2017_2024	Qualitative	None
E3_2017_2024	Unclassified	None
E3_2017_2024	Survey	UTAUT
E3_2017_2024	Unclassified	UTAUT
E3_2017_2024	Unclassified	UTAUT
E3_2017_2024	Unclassified	None
E3_2017_2024	Unclassified	None
E2_2009_2016	Unclassified	None
E3_2017_2024	Qualitative	None
E2_2009_2016	Unclassified	None
E1_2000_2008	Unclassified	None
E3_2017_2024	Survey	None
E3_2017_2024	Qualitative	TAM
E3_2017_2024	Unclassified	None
E3_2017_2024	Unclassified	None
E3_2017_2024	Qualitative	None
E3_2017_2024	PLS_SEM	UTAUT
E3_2017_2024	Survey	None
E3_2017_2024	Unclassified	None
E3_2017_2024	Survey	TAM
E3_2017_2024	Survey	None
E3_2017_2024	Unclassified	None
E3_2017_2024	Survey	TAM
E3_2017_2024	Unclassified	TAM
E3_2017_2024	Unclassified	TRI
E3_2017_2024	Unclassified	None
E1_2000_2008	Survey	None
E3_2017_2024	Unclassified	None
E2_2009_2016	Survey	None
E3_2017_2024	Survey	TAM
E2_2009_2016	Unclassified	None
E1_2000_2008	Survey	TAM
E2_2009_2016	Unclassified	None
E2_2009_2016	Unclassified	None
E3_2017_2024	Unclassified	None
E3_2017_2024	Unclassified	None
E3_2017_2024	Unclassified	None
E2_2009_2016	Unclassified	None
E2_2009_2016	Unclassified	None
E3_2017_2024	ML_NLP	None
E1_2000_2008	Unclassified	None
E2_2009_2016	Survey	TAM
E3_2017_2024	Unclassified	None
E3_2017_2024	Unclassified	None
E3_2017_2024	Unclassified	None
E3_2017_2024	Qualitative	TRI
E3_2017_2024	Unclassified	TRI
E3_2017_2024	PLS_SEM	None
E3_2017_2024	Survey	None
E3_2017_2024	Unclassified	TRI
E3_2017_2024	Qualitative	None
E3_2017_2024	Qualitative	None
E3_2017_2024	Unclassified	None
E3_2017_2024	Survey	TAM
E3_2017_2024	Survey	UTAUT
E3_2017_2024	Qualitative	UTAUT
E3_2017_2024	Survey	UTAUT
E3_2017_2024	Unclassified	None
E3_2017_2024	Unclassified	None
E2_2009_2016	Unclassified	None
E1_2000_2008	Unclassified	None
E1_2000_2008	Unclassified	None
E3_2017_2024	Unclassified	None
E2_2009_2016	Unclassified	None
E3_2017_2024	Unclassified	None
E3_2017_2024	Unclassified	None
E3_2017_2024	Unclassified	None
E3_2017_2024	Unclassified	None
E3_2017_2024	Qualitative	None
E3_2017_2024	Unclassified	None
E1_2000_2008	Survey	None
E1_2000_2008	Unclassified	TAM
E2_2009_2016	Unclassified	None
E3_2017_2024	Qualitative	None
E1_2000_2008	Unclassified	None
E1_2000_2008	Qualitative	TAM
E3_2017_2024	Unclassified	None
E3_2017_2024	Unclassified	None
E3_2017_2024	Unclassified	TRI
E3_2017_2024	Survey	None
E2_2009_2016	Unclassified	None
E3_2017_2024	Unclassified	None
E3_2017_2024	Qualitative	None
E3_2017_2024	Survey	TAM
E3_2017_2024	Survey	None
E3_2017_2024	Unclassified	None
E3_2017_2024	Survey	None
E3_2017_2024	Qualitative	None
E3_2017_2024	Unclassified	None
E3_2017_2024	Unclassified	None
E3_2017_2024	Unclassified	None
E3_2017_2024	Survey	None
E3_2017_2024	Survey	None
E3_2017_2024	Unclassified	None
E3_2017_2024	PLS_SEM	None
E3_2017_2024	Survey	None
E3_2017_2024	Unclassified	None
E3_2017_2024	Survey	None
E3_2017_2024	Survey	None
E3_2017_2024	Qualitative	None
E3_2017_2024	Unclassified	None
E3_2017_2024	Unclassified	None
E3_2017_2024	Unclassified	None
E3_2017_2024	Survey	None
E3_2017_2024	Survey	None
E3_2017_2024	Unclassified	None
E3_2017_2024	Unclassified	None
E3_2017_2024	Survey	None
E2_2009_2016	Survey	None
E2_2009_2016	Unclassified	None
E3_2017_2024	ML_NLP	None
E3_2017_2024	Unclassified	TRI
E3_2017_2024	Qualitative	TRI
E3_2017_2024	Unclassified	TRI
E3_2017_2024	Unclassified	TRI
E3_2017_2024	Unclassified	TRI
E3_2017_2024	Unclassified	None
E3_2017_2024	Unclassified	TRI
E3_2017_2024	Unclassified	None
E3_2017_2024	Unclassified	None
E3_2017_2024	ML_NLP	None
E3_2017_2024	Survey	TRI
E3_2017_2024	Qualitative	TRI
E3_2017_2024	Qualitative	TRI
E3_2017_2024	Unclassified	TRI
E3_2017_2024	Unclassified	None
E3_2017_2024	Qualitative	TRI
E3_2017_2024	Unclassified	TRI
E3_2017_2024	Unclassified	None
E3_2017_2024	Unclassified	None
E2_2009_2016	Unclassified	TRI
E2_2009_2016	Unclassified	TRI
E1_2000_2008	Qualitative	None
E3_2017_2024	Unclassified	None
E3_2017_2024	Unclassified	None
E3_2017_2024	Unclassified	None
E3_2017_2024	Survey	None
E3_2017_2024	Unclassified	None
E3_2017_2024	Unclassified	None
E3_2017_2024	Unclassified	None
E3_2017_2024	Unclassified	UTAUT
E3_2017_2024	Unclassified	None
E2_2009_2016	Survey	None
E3_2017_2024	Qualitative	None
E3_2017_2024	Qualitative	TAM
E3_2017_2024	Survey	None
E3_2017_2024	Survey	UTAUT
E3_2017_2024	Qualitative	None
E3_2017_2024	Survey	None
E3_2017_2024	Survey	None
E3_2017_2024	Unclassified	None
E3_2017_2024	Survey	None
E3_2017_2024	Survey	None
E3_2017_2024	Qualitative	None
E3_2017_2024	Survey	None
E3_2017_2024	Unclassified	None
E3_2017_2024	Unclassified	None
E3_2017_2024	Unclassified	None
E3_2017_2024	Survey	None
E3_2017_2024	Survey	None
E3_2017_2024	Qualitative	None
E3_2017_2024	Survey	None
E3_2017_2024	Unclassified	None
E3_2017_2024	Unclassified	None
E3_2017_2024	Unclassified	None
E3_2017_2024	Qualitative	None
E3_2017_2024	Qualitative	None
E3_2017_2024	Survey	None
E3_2017_2024	Unclassified	None
E3_2017_2024	Qualitative	None
E3_2017_2024	Unclassified	UTAUT
E3_2017_2024	Unclassified	None
E3_2017_2024	Qualitative	None
E3_2017_2024	Unclassified	None
E3_2017_2024	Unclassified	None
E3_2017_2024	Unclassified	None
E3_2017_2024	Unclassified	None
E3_2017_2024	Unclassified	None
E3_2017_2024	Survey	None
E3_2017_2024	Survey	None
E3_2017_2024	Survey	None
E3_2017_2024	Unclassified	None
E3_2017_2024	Unclassified	None
E3_2017_2024	Survey	None
E3_2017_2024	Qualitative	None
E3_2017_2024	Survey	None
E3_2017_2024	Unclassified	None
E3_2017_2024	Qualitative	None
E3_2017_2024	Survey	None
E3_2017_2024	Survey	None
E3_2017_2024	Qualitative	None
E2_2009_2016	Unclassified	None
E2_2009_2016	Unclassified	None
E2_2009_2016	Unclassified	None
E2_2009_2016	Unclassified	None
E2_2009_2016	Unclassified	None
E2_2009_2016	Qualitative	None
E2_2009_2016	Unclassified	None
E2_2009_2016	Unclassified	None
E2_2009_2016	Survey	None
E1_2000_2008	Unclassified	None
E3_2017_2024	Survey	TAM
E3_2017_2024	Qualitative	TAM
E3_2017_2024	Qualitative	None
E3_2017_2024	Unclassified	None
E3_2017_2024	Unclassified	None
E2_2009_2016	Survey	None
E3_2017_2024	Survey	TRI
E2_2009_2016	Unclassified	TRI
E2_2009_2016	Qualitative	None
E3_2017_2024	Unclassified	TAM
E3_2017_2024	PLS_SEM	UTAUT
E3_2017_2024	Survey	UTAUT
E3_2017_2024	Unclassified	UTAUT
E3_2017_2024	Unclassified	UTAUT
E2_2009_2016	Unclassified	TAM
E2_2009_2016	Unclassified	None
E2_2009_2016	Qualitative	TAM
E1_2000_2008	Unclassified	None
E3_2017_2024	Unclassified	TAM
E3_2017_2024	Unclassified	TAM
E3_2017_2024	Qualitative	None
E3_2017_2024	Survey	None
E2_2009_2016	Unclassified	None
E3_2017_2024	Unclassified	UTAUT
E3_2017_2024	Survey	None
E3_2017_2024	Survey	None
E3_2017_2024	Qualitative	None
E3_2017_2024	Survey	None
E3_2017_2024	Qualitative	None
E3_2017_2024	Unclassified	None
E3_2017_2024	Unclassified	None
E3_2017_2024	Unclassified	None
E3_2017_2024	Unclassified	None
E1_2000_2008	Survey	TRI
E2_2009_2016	Unclassified	None
E2_2009_2016	Unclassified	TAM
E2_2009_2016	Unclassified	UTAUT
E1_2000_2008	Survey	TAM
E2_2009_2016	Unclassified	TAM
E1_2000_2008	Unclassified	UTAUT
E1_2000_2008	Unclassified	None
E3_2017_2024	Unclassified	None
E3_2017_2024	Survey	TAM
E3_2017_2024	Survey	None
E3_2017_2024	Unclassified	None
E3_2017_2024	Qualitative	UTAUT
E3_2017_2024	Unclassified	None
E2_2009_2016	Qualitative	None
E3_2017_2024	Unclassified	None
E3_2017_2024	Unclassified	None
E3_2017_2024	ML_NLP	None
E2_2009_2016	Unclassified	None
E2_2009_2016	Survey	TAM
E3_2017_2024	Qualitative	None
E3_2017_2024	Unclassified	None
E3_2017_2024	Survey	None
E3_2017_2024	Unclassified	None
E3_2017_2024	Survey	UTAUT
E3_2017_2024	Unclassified	TAM
E3_2017_2024	Unclassified	None
E3_2017_2024	Unclassified	None
E2_2009_2016	Unclassified	None
E3_2017_2024	Unclassified	None
E3_2017_2024	Unclassified	None
E3_2017_2024	Unclassified	None
E3_2017_2024	Unclassified	None
E3_2017_2024	Unclassified	None
E3_2017_2024	Unclassified	None
E3_2017_2024	Qualitative	None
E3_2017_2024	Survey	None
E3_2017_2024	Unclassified	None
E2_2009_2016	Unclassified	None
E3_2017_2024	Survey	TAM
E3_2017_2024	Qualitative	TRI
E3_2017_2024	Unclassified	TRI
E3_2017_2024	Unclassified	None
E3_2017_2024	Unclassified	None
E2_2009_2016	Unclassified	TAM
E2_2009_2016	Survey	TAM
E3_2017_2024	Unclassified	None
E2_2009_2016	Survey	TAM
E3_2017_2024	Unclassified	None
E3_2017_2024	Unclassified	None
E3_2017_2024	Survey	None
E3_2017_2024	Unclassified	None
E2_2009_2016	Unclassified	None
E3_2017_2024	Unclassified	None
E2_2009_2016	Survey	None
E3_2017_2024	Qualitative	None
E3_2017_2024	Unclassified	TAM
E3_2017_2024	Survey	None
E3_2017_2024	Unclassified	None
E3_2017_2024	Unclassified	None
E3_2017_2024	Survey	None
E3_2017_2024	Unclassified	None
E3_2017_2024	Unclassified	None
E3_2017_2024	Unclassified	None
E3_2017_2024	Unclassified	None
E3_2017_2024	Unclassified	None
E3_2017_2024	Survey	None
E3_2017_2024	Unclassified	None
E3_2017_2024	Survey	None
E3_2017_2024	Unclassified	None
E3_2017_2024	Unclassified	None
E3_2017_2024	Unclassified	None
E3_2017_2024	Qualitative	None
E3_2017_2024	Survey	None
E2_2009_2016	Survey	None
E2_2009_2016	Survey	None
E2_2009_2016	Survey	None
E3_2017_2024	Survey	TRI
E3_2017_2024	Survey	TAM
E3_2017_2024	Qualitative	None
E3_2017_2024	Unclassified	TAM
E3_2017_2024	Unclassified	TAM
E3_2017_2024	Unclassified	None
E3_2017_2024	Unclassified	TAM
E3_2017_2024	Unclassified	None
E3_2017_2024	Unclassified	TAM
E3_2017_2024	Qualitative	None
E3_2017_2024	Unclassified	None
E3_2017_2024	Qualitative	None
E2_2009_2016	Unclassified	None
E3_2017_2024	Unclassified	None
E3_2017_2024	Qualitative	None
E3_2017_2024	Qualitative	None
E2_2009_2016	Unclassified	TAM
E2_2009_2016	Unclassified	None
E3_2017_2024	Unclassified	None
E1_2000_2008	Unclassified	TAM
E1_2000_2008	Survey	TAM
E3_2017_2024	Unclassified	TAM
E3_2017_2024	Unclassified	None
E2_2009_2016	Unclassified	TAM
E2_2009_2016	Survey	TAM
E3_2017_2024	Unclassified	None
E3_2017_2024	Survey	None
E3_2017_2024	Qualitative	None
E3_2017_2024	Survey	None
E3_2017_2024	Qualitative	None
E3_2017_2024	Qualitative	None
E3_2017_2024	Survey	None
E1_2000_2008	Survey	TRI
E2_2009_2016	Survey	None
E3_2017_2024	Qualitative	None
E3_2017_2024	Survey	TAM
E3_2017_2024	Survey	TAM
E3_2017_2024	Survey	None
E3_2017_2024	PLS_SEM	TAM
E3_2017_2024	Survey	TAM
E3_2017_2024	Survey	TAM
E3_2017_2024	Survey	UTAUT
E3_2017_2024	Qualitative	UTAUT
E3_2017_2024	Survey	None
E3_2017_2024	Survey	None
E3_2017_2024	Qualitative	None
E3_2017_2024	Survey	None
E3_2017_2024	Survey	UTAUT
E3_2017_2024	Survey	TAM
E3_2017_2024	Qualitative	TAM
E3_2017_2024	Survey	TAM
E3_2017_2024	Qualitative	TAM
E3_2017_2024	Survey	None
E3_2017_2024	Qualitative	None
E3_2017_2024	Survey	TAM
E3_2017_2024	Unclassified	None
E3_2017_2024	PLS_SEM	None
E3_2017_2024	Survey	None
E3_2017_2024	Qualitative	None
E1_2000_2008	Survey	TAM
E3_2017_2024	Unclassified	None
E3_2017_2024	Survey	TRI
E3_2017_2024	Survey	UTAUT
E3_2017_2024	Unclassified	UTAUT
E2_2009_2016	Survey	TAM
E2_2009_2016	Unclassified	TAM
E1_2000_2008	Survey	None
E3_2017_2024	Unclassified	None
E2_2009_2016	Unclassified	None
E2_2009_2016	Unclassified	TAM
E2_2009_2016	Unclassified	UTAUT
E1_2000_2008	Unclassified	None
E1_2000_2008	Unclassified	None
E1_2000_2008	Unclassified	None
E3_2017_2024	Qualitative	None
E2_2009_2016	Qualitative	None
E3_2017_2024	Unclassified	None
E3_2017_2024	Unclassified	TRI
E3_2017_2024	Unclassified	None
E2_2009_2016	Unclassified	None
E2_2009_2016	Unclassified	TAM
E2_2009_2016	Survey	None
E3_2017_2024	Unclassified	None
E2_2009_2016	Unclassified	UTAUT
E1_2000_2008	Unclassified	None
E3_2017_2024	Unclassified	None
E3_2017_2024	Unclassified	None
E3_2017_2024	Unclassified	None
E3_2017_2024	Qualitative	None
E1_2000_2008	Unclassified	None
E3_2017_2024	Unclassified	None
E3_2017_2024	Survey	None
E2_2009_2016	Survey	TRI
E2_2009_2016	Qualitative	None
E2_2009_2016	Qualitative	None
E3_2017_2024	Survey	TAM
E3_2017_2024	Survey	UTAUT
E3_2017_2024	PLS_SEM	UTAUT
E3_2017_2024	Survey	UTAUT
E2_2009_2016	Survey	TAM
E2_2009_2016	Survey	TAM
E2_2009_2016	Survey	None
E2_2009_2016	Unclassified	None
E2_2009_2016	Survey	None
E1_2000_2008	Qualitative	None
E2_2009_2016	Survey	None
E2_2009_2016	Qualitative	None
E2_2009_2016	Survey	None
E2_2009_2016	Unclassified	None
E3_2017_2024	Qualitative	None
E3_2017_2024	Unclassified	None
E2_2009_2016	Unclassified	None
E3_2017_2024	Unclassified	None
E2_2009_2016	Unclassified	None
E2_2009_2016	Unclassified	None
E2_2009_2016	Unclassified	TAM
E3_2017_2024	Survey	UTAUT
E3_2017_2024	ML_NLP	None
E3_2017_2024	Survey	None
E3_2017_2024	Unclassified	None
E3_2017_2024	Unclassified	None
E3_2017_2024	Survey	UTAUT
E3_2017_2024	Survey	UTAUT
E3_2017_2024	Survey	UTAUT
E3_2017_2024	Survey	UTAUT
E3_2017_2024	Unclassified	None
E3_2017_2024	Survey	None
E3_2017_2024	Survey	TAM
E3_2017_2024	Survey	TAM
E3_2017_2024	Survey	TAM
E2_2009_2016	Unclassified	TAM
E2_2009_2016	Unclassified	TRI
E2_2009_2016	Unclassified	None
E2_2009_2016	CB_SEM	TAM
E2_2009_2016	Survey	TAM
E2_2009_2016	Survey	TAM
E2_2009_2016	Unclassified	TAM
E2_2009_2016	Survey	TAM
E2_2009_2016	Unclassified	TAM
E1_2000_2008	Survey	TAM
E1_2000_2008	Qualitative	TAM
E1_2000_2008	Unclassified	TAM
E1_2000_2008	Survey	None
E1_2000_2008	Unclassified	TAM
E3_2017_2024	Unclassified	TAM
E3_2017_2024	Unclassified	UTAUT
E2_2009_2016	Unclassified	TAM
E2_2009_2016	Unclassified	None
E2_2009_2016	Unclassified	TAM
E1_2000_2008	Unclassified	None
E2_2009_2016	Survey	None
E1_2000_2008	Unclassified	TAM
E3_2017_2024	Survey	UTAUT
E3_2017_2024	Unclassified	None
E3_2017_2024	Survey	None
E3_2017_2024	Qualitative	None
E2_2009_2016	Survey	None
E2_2009_2016	Unclassified	None
E2_2009_2016	Qualitative	None
E1_2000_2008	Survey	TRI
E1_2000_2008	Survey	None
E1_2000_2008	Unclassified	None
E1_2000_2008	Unclassified	None
E2_2009_2016	Unclassified	None
E3_2017_2024	Unclassified	TAM
E2_2009_2016	Survey	TRI
E3_2017_2024	Unclassified	TRI
E2_2009_2016	Unclassified	TAM
E2_2009_2016	Unclassified	TAM
E2_2009_2016	Unclassified	None
E2_2009_2016	Survey	None
E2_2009_2016	Qualitative	None
E1_2000_2008	Unclassified	None
E1_2000_2008	Qualitative	None
E1_2000_2008	Unclassified	None
E1_2000_2008	Unclassified	None
E1_2000_2008	Unclassified	None
E3_2017_2024	Unclassified	None
E2_2009_2016	Unclassified	None
E2_2009_2016	Unclassified	None
E3_2017_2024	Unclassified	None
E1_2000_2008	Unclassified	None
E2_2009_2016	Unclassified	None
E2_2009_2016	Unclassified	None
E3_2017_2024	Unclassified	TAM
E3_2017_2024	Unclassified	TAM
E2_2009_2016	Unclassified	UTAUT
E2_2009_2016	Unclassified	TRI
E2_2009_2016	Unclassified	None
E2_2009_2016	Unclassified	TAM
E2_2009_2016	Unclassified	TAM
E2_2009_2016	Unclassified	TRI
E1_2000_2008	Unclassified	TRI
E2_2009_2016	Unclassified	None
E2_2009_2016	Unclassified	None
E3_2017_2024	Unclassified	TRI
E3_2017_2024	Unclassified	None
E2_2009_2016	Unclassified	TAM
E3_2017_2024	Survey	None
E2_2009_2016	Unclassified	TAM
E1_2000_2008	Survey	None
E3_2017_2024	Qualitative	None
E2_2009_2016	Unclassified	None
E2_2009_2016	Unclassified	TRI
E2_2009_2016	Unclassified	TRI
E3_2017_2024	Survey	UTAUT
E3_2017_2024	Survey	None
E3_2017_2024	Unclassified	TAM
E3_2017_2024	Unclassified	UTAUT
E2_2009_2016	Survey	UTAUT
E2_2009_2016	Unclassified	TAM
E2_2009_2016	Unclassified	TAM
E3_2017_2024	Unclassified	None
E3_2017_2024	Unclassified	None
E3_2017_2024	Unclassified	None
E3_2017_2024	Unclassified	None
E3_2017_2024	Survey	None
E3_2017_2024	Qualitative	None
E3_2017_2024	Unclassified	None
E3_2017_2024	Unclassified	None
E3_2017_2024	Unclassified	None
E3_2017_2024	Unclassified	TAM
E2_2009_2016	Qualitative	None
E2_2009_2016	Unclassified	None
E2_2009_2016	Qualitative	None
E2_2009_2016	Survey	TAM
E1_2000_2008	Unclassified	TAM
E2_2009_2016	Unclassified	TRI
E3_2017_2024	Qualitative	None
E3_2017_2024	Unclassified	None
E3_2017_2024	Unclassified	TAM
E3_2017_2024	Unclassified	UTAUT
E3_2017_2024	Unclassified	None
E2_2009_2016	Survey	TAM
E1_2000_2008	Survey	TAM
E2_2009_2016	Survey	None
E2_2009_2016	Unclassified	UTAUT
E2_2009_2016	Unclassified	UTAUT
E3_2017_2024	Survey	TAM
E3_2017_2024	Unclassified	None
E3_2017_2024	Qualitative	None
E3_2017_2024	Survey	None
E3_2017_2024	Qualitative	None
E3_2017_2024	Unclassified	None
E3_2017_2024	Unclassified	None
E3_2017_2024	Unclassified	None
E3_2017_2024	Survey	None
E3_2017_2024	Survey	None
E3_2017_2024	Qualitative	None
E3_2017_2024	Qualitative	None
E3_2017_2024	Unclassified	None
E3_2017_2024	Survey	None
E3_2017_2024	Unclassified	None
E3_2017_2024	Unclassified	None
E3_2017_2024	Survey	None
E3_2017_2024	Unclassified	None
E3_2017_2024	Survey	TAM
E3_2017_2024	Unclassified	None
E3_2017_2024	Unclassified	None
E2_2009_2016	Unclassified	None
E2_2009_2016	Unclassified	TAM
E2_2009_2016	Unclassified	None
E3_2017_2024	Unclassified	TAM
E3_2017_2024	Unclassified	UTAUT
E2_2009_2016	Survey	TAM
E1_2000_2008	Survey	TRI
E3_2017_2024	Survey	TAM
E3_2017_2024	Unclassified	TAM
E3_2017_2024	Survey	None
E3_2017_2024	Survey	None
E3_2017_2024	Unclassified	None
E3_2017_2024	Survey	UTAUT
E2_2009_2016	Unclassified	None
E3_2017_2024	Survey	None
E1_2000_2008	Survey	TAM
E2_2009_2016	Survey	None
E1_2000_2008	Qualitative	None
E3_2017_2024	Unclassified	None
E3_2017_2024	Unclassified	None
E3_2017_2024	Survey	None
E3_2017_2024	Unclassified	None
E3_2017_2024	PLS_SEM	None
E3_2017_2024	Survey	None
E3_2017_2024	ML_NLP	None
E3_2017_2024	Unclassified	None
E3_2017_2024	Unclassified	None
E3_2017_2024	Survey	None
E3_2017_2024	Unclassified	None
E3_2017_2024	ML_NLP	TAM
E3_2017_2024	ML_NLP	None
E3_2017_2024	Unclassified	UTAUT
E3_2017_2024	Qualitative	None
E3_2017_2024	Survey	None
E3_2017_2024	Unclassified	None
E3_2017_2024	Unclassified	None
E3_2017_2024	Qualitative	None
E3_2017_2024	Unclassified	None
E3_2017_2024	PLS_SEM	None
E3_2017_2024	Survey	None
E3_2017_2024	Qualitative	None
E3_2017_2024	Unclassified	None
E3_2017_2024	Qualitative	None
E3_2017_2024	Qualitative	None
E3_2017_2024	Qualitative	None
E3_2017_2024	Unclassified	None
E3_2017_2024	Survey	None
E3_2017_2024	Unclassified	None
E3_2017_2024	Unclassified	None
E3_2017_2024	Survey	None
E3_2017_2024	Unclassified	None
E3_2017_2024	Unclassified	None
E3_2017_2024	Unclassified	None
E3_2017_2024	Unclassified	None
E2_2009_2016	Survey	None
E3_2017_2024	Survey	TAM
E3_2017_2024	Qualitative	TAM
E3_2017_2024	Unclassified	None
E3_2017_2024	Unclassified	None
E3_2017_2024	Unclassified	None
E3_2017_2024	Unclassified	None
E2_2009_2016	Survey	TAM
E3_2017_2024	Unclassified	None
E3_2017_2024	Unclassified	None
E3_2017_2024	Unclassified	None
E3_2017_2024	Unclassified	None
E3_2017_2024	Unclassified	None
E3_2017_2024	Unclassified	None
E3_2017_2024	Qualitative	None
E3_2017_2024	Unclassified	None
E3_2017_2024	Qualitative	None
E3_2017_2024	Qualitative	None
E3_2017_2024	Unclassified	None
E3_2017_2024	Unclassified	None
E3_2017_2024	Unclassified	None
E3_2017_2024	Survey	None
E3_2017_2024	Unclassified	None
E3_2017_2024	Unclassified	None
E2_2009_2016	Unclassified	None
E2_2009_2016	Unclassified	None
E2_2009_2016	Unclassified	None
E2_2009_2016	Unclassified	None
E2_2009_2016	Unclassified	None
E2_2009_2016	Unclassified	None
E2_2009_2016	Unclassified	None
E3_2017_2024	Unclassified	UTAUT
E2_2009_2016	Unclassified	None
E2_2009_2016	Unclassified	None
E2_2009_2016	Unclassified	None
E2_2009_2016	Qualitative	None
E2_2009_2016	Unclassified	None
E2_2009_2016	Unclassified	None
E2_2009_2016	Unclassified	None
E2_2009_2016	Survey	None
E2_2009_2016	Unclassified	None
E3_2017_2024	Survey	UTAUT
E2_2009_2016	Survey	None
E2_2009_2016	Unclassified	None
E2_2009_2016	Unclassified	None
E2_2009_2016	Unclassified	None
E2_2009_2016	Unclassified	None
E3_2017_2024	Survey	TAM
E3_2017_2024	Survey	UTAUT
E2_2009_2016	Unclassified	None
E2_2009_2016	Unclassified	None
E2_2009_2016	Qualitative	None
E2_2009_2016	Unclassified	None
E3_2017_2024	Unclassified	TAM
E3_2017_2024	Unclassified	None
E3_2017_2024	Unclassified	TAM
E3_2017_2024	CB_SEM	TAM
E2_2009_2016	Unclassified	TAM
E3_2017_2024	Unclassified	None
E3_2017_2024	Qualitative	TRI
E3_2017_2024	Survey	UTAUT
E3_2017_2024	Unclassified	None
E3_2017_2024	Unclassified	None
E3_2017_2024	Unclassified	TAM
E3_2017_2024	Unclassified	None
E3_2017_2024	Survey	TAM
E3_2017_2024	Unclassified	None
E3_2017_2024	Survey	None
E3_2017_2024	Unclassified	UTAUT
E3_2017_2024	Unclassified	TAM
E3_2017_2024	Unclassified	TAM
E3_2017_2024	Unclassified	TRI
E3_2017_2024	Survey	TAM
E2_2009_2016	Survey	TAM
E3_2017_2024	Unclassified	UTAUT
E3_2017_2024	Qualitative	None
E3_2017_2024	Unclassified	UTAUT
E3_2017_2024	Survey	TAM
E2_2009_2016	Unclassified	None
E2_2009_2016	Unclassified	None
E3_2017_2024	Unclassified	UTAUT
E2_2009_2016	Unclassified	None
E2_2009_2016	Qualitative	None
E1_2000_2008	Unclassified	TAM
E1_2000_2008	Unclassified	None
E1_2000_2008	Unclassified	None
E3_2017_2024	Unclassified	None
E3_2017_2024	Survey	None
E3_2017_2024	Unclassified	None
E2_2009_2016	Survey	TAM
E2_2009_2016	Survey	None
E3_2017_2024	Unclassified	None
E3_2017_2024	Unclassified	None
E2_2009_2016	Unclassified	None
E2_2009_2016	Survey	None
E2_2009_2016	Unclassified	None
E2_2009_2016	Unclassified	None
E2_2009_2016	Unclassified	UTAUT
E3_2017_2024	Unclassified	UTAUT
E3_2017_2024	Survey	UTAUT
E3_2017_2024	Survey	None
E3_2017_2024	Unclassified	None
E3_2017_2024	Unclassified	UTAUT
E3_2017_2024	Unclassified	UTAUT
E3_2017_2024	Unclassified	UTAUT
E3_2017_2024	Unclassified	None
E3_2017_2024	Unclassified	None
E3_2017_2024	Unclassified	None
E3_2017_2024	Survey	None
E3_2017_2024	Unclassified	None
E3_2017_2024	Unclassified	TAM
E3_2017_2024	Unclassified	UTAUT
E3_2017_2024	Unclassified	None
E3_2017_2024	Unclassified	None
E3_2017_2024	Survey	TAM
E3_2017_2024	Unclassified	TAM
E3_2017_2024	Survey	TAM
E3_2017_2024	Survey	UTAUT
E3_2017_2024	Survey	UTAUT
E3_2017_2024	Survey	TAM
E3_2017_2024	Unclassified	TAM
E2_2009_2016	Qualitative	None
E2_2009_2016	Unclassified	None
E2_2009_2016	Unclassified	UTAUT
E2_2009_2016	Unclassified	UTAUT
E2_2009_2016	Unclassified	TAM
E2_2009_2016	Survey	TAM
E2_2009_2016	Survey	None
E2_2009_2016	Survey	TAM
E1_2000_2008	Unclassified	None
E3_2017_2024	Unclassified	UTAUT
E3_2017_2024	Unclassified	TAM
E3_2017_2024	Survey	TRI
E3_2017_2024	Survey	UTAUT
E2_2009_2016	Survey	TAM
E3_2017_2024	PLS_SEM	UTAUT
E3_2017_2024	Unclassified	None
E3_2017_2024	Survey	None
E3_2017_2024	Qualitative	None
E2_2009_2016	Survey	None
E3_2017_2024	Unclassified	None
E3_2017_2024	Survey	None
E3_2017_2024	Qualitative	None
E3_2017_2024	Survey	None
E3_2017_2024	Unclassified	None
E3_2017_2024	Unclassified	None
E3_2017_2024	Unclassified	None
E3_2017_2024	Qualitative	None
E3_2017_2024	Qualitative	None
E2_2009_2016	Survey	None
E2_2009_2016	Qualitative	None
E2_2009_2016	Survey	None
E2_2009_2016	Qualitative	None
E2_2009_2016	Qualitative	None
E2_2009_2016	Unclassified	None
E2_2009_2016	Unclassified	None
E2_2009_2016	Qualitative	None
E1_2000_2008	Unclassified	None
E3_2017_2024	Unclassified	TAM
E3_2017_2024	Unclassified	None
E2_2009_2016	Survey	None
E2_2009_2016	Survey	None
E2_2009_2016	Survey	None
E2_2009_2016	Unclassified	TAM
E1_2000_2008	Unclassified	None
E1_2000_2008	Unclassified	TAM
E1_2000_2008	Unclassified	None
E2_2009_2016	Unclassified	None
E2_2009_2016	Survey	None
E2_2009_2016	Unclassified	None
E2_2009_2016	Survey	None
E2_2009_2016	Unclassified	None
E2_2009_2016	Survey	None
E2_2009_2016	Unclassified	None
E3_2017_2024	Qualitative	None
E2_2009_2016	Unclassified	None
E2_2009_2016	Unclassified	None
E2_2009_2016	Unclassified	TAM
E2_2009_2016	Unclassified	UTAUT
E2_2009_2016	Survey	None
E2_2009_2016	Unclassified	TAM
E2_2009_2016	Unclassified	TAM
E2_2009_2016	Unclassified	None
E2_2009_2016	Qualitative	None
E2_2009_2016	Unclassified	None
E2_2009_2016	Unclassified	None
E2_2009_2016	Unclassified	TAM
E1_2000_2008	Qualitative	None
E1_2000_2008	Unclassified	TAM
E1_2000_2008	Unclassified	None
E1_2000_2008	Survey	None
E1_2000_2008	Unclassified	TAM
E1_2000_2008	CB_SEM	TAM
E1_2000_2008	Survey	TAM
E1_2000_2008	Survey	TAM
E1_2000_2008	Unclassified	TAM
E1_2000_2008	Unclassified	None
E1_2000_2008	Survey	TAM
E1_2000_2008	Survey	TAM
E3_2017_2024	Unclassified	None
E3_2017_2024	Unclassified	None
E3_2017_2024	Qualitative	None
E2_2009_2016	Qualitative	None
E1_2000_2008	Survey	None
E3_2017_2024	Qualitative	None
E3_2017_2024	ML_NLP	None
E3_2017_2024	Unclassified	None
E3_2017_2024	Unclassified	None
E2_2009_2016	Survey	UTAUT
E3_2017_2024	Unclassified	None
E3_2017_2024	Unclassified	None
E3_2017_2024	Qualitative	TRI
E3_2017_2024	Unclassified	None
E3_2017_2024	Unclassified	TRI
E3_2017_2024	Unclassified	None
E2_2009_2016	Unclassified	TRI
E2_2009_2016	Unclassified	TRI
E1_2000_2008	Unclassified	None
E3_2017_2024	Unclassified	None
E3_2017_2024	Unclassified	None
E3_2017_2024	Survey	UTAUT
E3_2017_2024	Unclassified	UTAUT
E3_2017_2024	Survey	None
E3_2017_2024	Survey	None
E3_2017_2024	Unclassified	None
E2_2009_2016	Unclassified	TAM
E2_2009_2016	Unclassified	TAM
E1_2000_2008	Unclassified	TAM
E1_2000_2008	Survey	None
E1_2000_2008	Survey	TAM
E1_2000_2008	Qualitative	TAM
E1_2000_2008	Unclassified	None
E1_2000_2008	Survey	TAM
E1_2000_2008	Unclassified	TAM
E1_2000_2008	Unclassified	None
E3_2017_2024	Unclassified	None
E3_2017_2024	Unclassified	None
E3_2017_2024	Unclassified	None
E2_2009_2016	Survey	None
E2_2009_2016	Unclassified	None
E2_2009_2016	Unclassified	None
E3_2017_2024	Unclassified	TAM
E3_2017_2024	Unclassified	None
E3_2017_2024	Survey	None
E2_2009_2016	Unclassified	TAM
E2_2009_2016	Unclassified	TAM
E2_2009_2016	Unclassified	None
E1_2000_2008	Survey	None
E1_2000_2008	Survey	TAM
E1_2000_2008	Unclassified	TAM
E1_2000_2008	Survey	TAM
E1_2000_2008	Unclassified	None
E3_2017_2024	Unclassified	None
E3_2017_2024	Survey	None
E2_2009_2016	Qualitative	None
E2_2009_2016	Survey	UTAUT
E3_2017_2024	Survey	None
E1_2000_2008	Survey	None
E1_2000_2008	Unclassified	None
E1_2000_2008	Survey	None
E2_2009_2016	Survey	None
E2_2009_2016	Survey	None
E2_2009_2016	Qualitative	None
E2_2009_2016	Survey	None
E2_2009_2016	Survey	None
E3_2017_2024	Unclassified	TRI
E3_2017_2024	Unclassified	TRI
E2_2009_2016	Unclassified	None
E2_2009_2016	Unclassified	None
E3_2017_2024	Unclassified	None
E3_2017_2024	Unclassified	None
E3_2017_2024	PLS_SEM	UTAUT
E3_2017_2024	Qualitative	None
E3_2017_2024	Unclassified	None
E3_2017_2024	Survey	TAM
E3_2017_2024	Survey	TRI
E2_2009_2016	Survey	TAM
E2_2009_2016	Unclassified	None
E1_2000_2008	Unclassified	None
E3_2017_2024	Survey	None
E3_2017_2024	Survey	UTAUT
E3_2017_2024	Unclassified	TAM
E3_2017_2024	Survey	None
E2_2009_2016	Survey	UTAUT
E3_2017_2024	Qualitative	None
E3_2017_2024	ML_NLP	None
E3_2017_2024	Survey	None
E3_2017_2024	Unclassified	None
E3_2017_2024	Unclassified	None
E3_2017_2024	Survey	None
E3_2017_2024	Unclassified	TRI
E3_2017_2024	Unclassified	TRI
E3_2017_2024	Survey	TRI
E3_2017_2024	Survey	TAM
E3_2017_2024	Unclassified	None
E3_2017_2024	Unclassified	None
E3_2017_2024	Survey	None
E3_2017_2024	Survey	None
E3_2017_2024	Survey	UTAUT
E3_2017_2024	Unclassified	None
E3_2017_2024	Qualitative	None
E3_2017_2024	Unclassified	None
E3_2017_2024	Survey	None
E3_2017_2024	Survey	TAM
E3_2017_2024	Unclassified	None
E3_2017_2024	Unclassified	None
E3_2017_2024	Qualitative	None
E3_2017_2024	Qualitative	TAM
E3_2017_2024	Unclassified	None
E3_2017_2024	Unclassified	None
E3_2017_2024	Unclassified	None
E3_2017_2024	Survey	None
E3_2017_2024	Qualitative	None
E3_2017_2024	Survey	None
E3_2017_2024	Qualitative	None
E2_2009_2016	Unclassified	None
E2_2009_2016	Unclassified	None
E2_2009_2016	Unclassified	None
E2_2009_2016	Unclassified	None
E1_2000_2008	Unclassified	None
E3_2017_2024	Unclassified	None
E2_2009_2016	Unclassified	None
E3_2017_2024	Qualitative	None
E3_2017_2024	Survey	None
E2_2009_2016	Unclassified	None
E2_2009_2016	Survey	None
E3_2017_2024	Survey	None
E3_2017_2024	Qualitative	None
E3_2017_2024	Qualitative	TAM
E3_2017_2024	Survey	TAM
E3_2017_2024	Qualitative	None
E3_2017_2024	Unclassified	TAM
E3_2017_2024	Survey	None
E3_2017_2024	Unclassified	None
E3_2017_2024	Survey	None
E2_2009_2016	Survey	TAM
E2_2009_2016	Qualitative	TAM
E2_2009_2016	Survey	None
E2_2009_2016	Unclassified	None
E2_2009_2016	Unclassified	TAM
E2_2009_2016	Unclassified	UTAUT
E2_2009_2016	Unclassified	TAM
E1_2000_2008	Survey	None
E3_2017_2024	Unclassified	None
E3_2017_2024	PLS_SEM	None
E3_2017_2024	Unclassified	None
E3_2017_2024	Unclassified	UTAUT
E3_2017_2024	Qualitative	None
E2_2009_2016	Survey	None
E1_2000_2008	Unclassified	None
E3_2017_2024	Unclassified	None
E3_2017_2024	PLS_SEM	TAM
E3_2017_2024	Unclassified	UTAUT
E3_2017_2024	Unclassified	TAM
E3_2017_2024	Unclassified	None
E3_2017_2024	Unclassified	TAM
E3_2017_2024	Unclassified	TAM
E3_2017_2024	Survey	TAM
E3_2017_2024	PLS_SEM	UTAUT
E3_2017_2024	Unclassified	UTAUT
E3_2017_2024	Survey	UTAUT
E3_2017_2024	Unclassified	UTAUT
E3_2017_2024	PLS_SEM	TAM
E3_2017_2024	Unclassified	None
E3_2017_2024	Survey	None
E3_2017_2024	Unclassified	None
E3_2017_2024	Survey	UTAUT
E3_2017_2024	Survey	None
E2_2009_2016	Survey	None
E2_2009_2016	Survey	TAM
E1_2000_2008	Unclassified	None
E1_2000_2008	Unclassified	TAM
E1_2000_2008	Unclassified	TAM
E2_2009_2016	Unclassified	None
E2_2009_2016	Unclassified	TAM
E2_2009_2016	Unclassified	UTAUT
E3_2017_2024	Unclassified	None
E3_2017_2024	Unclassified	TAM
E3_2017_2024	Unclassified	None
E3_2017_2024	Survey	TAM
E2_2009_2016	Unclassified	TAM
E3_2017_2024	Qualitative	None
E3_2017_2024	PLS_SEM	None
E3_2017_2024	Survey	None
E3_2017_2024	Survey	TRI
E3_2017_2024	Qualitative	TRI
E3_2017_2024	Unclassified	None
E3_2017_2024	Unclassified	None
E3_2017_2024	Survey	TAM
E3_2017_2024	Unclassified	None
E2_2009_2016	Unclassified	None
E2_2009_2016	Unclassified	None
E3_2017_2024	Unclassified	UTAUT
E1_2000_2008	Unclassified	None
E1_2000_2008	Unclassified	None
E2_2009_2016	Unclassified	None
E1_2000_2008	Survey	None
E1_2000_2008	Unclassified	None
E1_2000_2008	Unclassified	None
E1_2000_2008	Unclassified	None
E3_2017_2024	Unclassified	TAM
E2_2009_2016	Unclassified	TAM
E2_2009_2016	Survey	TAM
E3_2017_2024	Survey	None
E3_2017_2024	Unclassified	None
E3_2017_2024	Unclassified	None
E3_2017_2024	Unclassified	None
E1_2000_2008	Unclassified	TRI
E1_2000_2008	Unclassified	TAM
E1_2000_2008	Unclassified	TAM
E3_2017_2024	Unclassified	None
E3_2017_2024	ML_NLP	None
E2_2009_2016	Unclassified	None
E1_2000_2008	Unclassified	TAM
E3_2017_2024	Survey	TAM
E3_2017_2024	Qualitative	TAM
E3_2017_2024	Unclassified	TAM
E2_2009_2016	Unclassified	None
E1_2000_2008	Unclassified	None
E2_2009_2016	Unclassified	None
E3_2017_2024	Unclassified	None
E3_2017_2024	Unclassified	None
E3_2017_2024	Qualitative	None
E1_2000_2008	Unclassified	None
E3_2017_2024	Qualitative	TAM
E3_2017_2024	Survey	UTAUT
E3_2017_2024	Survey	None
E3_2017_2024	Survey	UTAUT
E2_2009_2016	Survey	TAM
E2_2009_2016	Survey	UTAUT
E2_2009_2016	Qualitative	TAM
E2_2009_2016	Qualitative	UTAUT
E2_2009_2016	Unclassified	None
E2_2009_2016	Unclassified	None
E2_2009_2016	Unclassified	None
E1_2000_2008	Unclassified	TAM
E1_2000_2008	Unclassified	None
E1_2000_2008	Unclassified	TAM
E1_2000_2008	Survey	None
E1_2000_2008	Unclassified	None
E1_2000_2008	Unclassified	None
E2_2009_2016	Unclassified	None
E3_2017_2024	Qualitative	None
E3_2017_2024	Survey	None
E3_2017_2024	Survey	TAM
E3_2017_2024	Unclassified	None
E3_2017_2024	Survey	None
E3_2017_2024	Unclassified	None
E3_2017_2024	Survey	None
E3_2017_2024	Unclassified	None
E3_2017_2024	Unclassified	None
E3_2017_2024	Survey	None
E3_2017_2024	Survey	TAM
E3_2017_2024	Unclassified	None
E3_2017_2024	Unclassified	None
E3_2017_2024	Unclassified	None
E3_2017_2024	Qualitative	None
E3_2017_2024	Unclassified	None
E3_2017_2024	Unclassified	None
E3_2017_2024	Unclassified	None
E3_2017_2024	Unclassified	None
E3_2017_2024	Unclassified	None
E3_2017_2024	Unclassified	None
E3_2017_2024	Unclassified	None
E3_2017_2024	Unclassified	None
E3_2017_2024	Unclassified	None
E3_2017_2024	Unclassified	None
E3_2017_2024	Unclassified	None
E3_2017_2024	Unclassified	None
E2_2009_2016	Unclassified	None
E2_2009_2016	Survey	None
E2_2009_2016	Unclassified	None
E3_2017_2024	Survey	None
E3_2017_2024	Unclassified	None
E3_2017_2024	Unclassified	None
E3_2017_2024	Unclassified	None
E2_2009_2016	Unclassified	TAM
E3_2017_2024	Unclassified	None
E3_2017_2024	Unclassified	None
E3_2017_2024	Qualitative	None
E3_2017_2024	Unclassified	None
E2_2009_2016	Unclassified	None
E3_2017_2024	Survey	None
E3_2017_2024	Unclassified	None
E3_2017_2024	Unclassified	UTAUT
E3_2017_2024	Survey	TAM
E3_2017_2024	PLS_SEM	UTAUT
E3_2017_2024	Survey	UTAUT
E2_2009_2016	Unclassified	TAM
E2_2009_2016	Survey	TAM
E3_2017_2024	Unclassified	None
E3_2017_2024	Unclassified	None
E3_2017_2024	Survey	None
E3_2017_2024	Qualitative	None
E3_2017_2024	Unclassified	None
E3_2017_2024	Survey	TAM
E3_2017_2024	Survey	UTAUT
E3_2017_2024	Survey	TAM3
E3_2017_2024	Qualitative	None
E3_2017_2024	Unclassified	None
E3_2017_2024	Unclassified	None
E3_2017_2024	Unclassified	TAM
E2_2009_2016	Unclassified	None
E1_2000_2008	Survey	TAM
E1_2000_2008	Unclassified	None
E3_2017_2024	Unclassified	TAM
E3_2017_2024	Unclassified	None
E3_2017_2024	Unclassified	None
E3_2017_2024	Qualitative	None
E2_2009_2016	Survey	TAM
E3_2017_2024	Unclassified	None
E3_2017_2024	Unclassified	None
E3_2017_2024	ML_NLP	None
E3_2017_2024	Qualitative	None
E3_2017_2024	Unclassified	None
E3_2017_2024	Unclassified	None
E2_2009_2016	Survey	None
E3_2017_2024	Unclassified	None
E2_2009_2016	Survey	None
E3_2017_2024	Qualitative	TAM
E3_2017_2024	Unclassified	UTAUT
E3_2017_2024	ML_NLP	UTAUT
E3_2017_2024	ML_NLP	None
E3_2017_2024	Unclassified	TAM
E3_2017_2024	Survey	None
E3_2017_2024	Unclassified	None
E3_2017_2024	Survey	None
E3_2017_2024	Unclassified	TAM
E3_2017_2024	Unclassified	UTAUT
E3_2017_2024	Unclassified	None
E3_2017_2024	Survey	None
E3_2017_2024	Survey	TRI
E3_2017_2024	Qualitative	TRI
E3_2017_2024	Unclassified	None
E3_2017_2024	Qualitative	UTAUT
E3_2017_2024	Qualitative	None
E3_2017_2024	Survey	None
E3_2017_2024	Survey	TAM
E3_2017_2024	ML_NLP	TAM
E3_2017_2024	Unclassified	None
E3_2017_2024	Unclassified	None
E2_2009_2016	Unclassified	TRI
E3_2017_2024	Unclassified	None
E3_2017_2024	Unclassified	None
E3_2017_2024	Unclassified	None
E3_2017_2024	Unclassified	None
E3_2017_2024	Survey	None
E3_2017_2024	Survey	None
E3_2017_2024	Survey	TAM
E3_2017_2024	Unclassified	None
E3_2017_2024	Unclassified	None
E1_2000_2008	Qualitative	None
E3_2017_2024	Unclassified	None
E2_2009_2016	Unclassified	None
E3_2017_2024	Unclassified	None
E3_2017_2024	Unclassified	None
E3_2017_2024	Unclassified	None
E3_2017_2024	PLS_SEM	None
E3_2017_2024	Survey	UTAUT
E3_2017_2024	Unclassified	None
E3_2017_2024	Unclassified	None
E3_2017_2024	Qualitative	None
E2_2009_2016	Survey	TAM
E3_2017_2024	Unclassified	TRI
E3_2017_2024	Unclassified	None
E3_2017_2024	Unclassified	TAM
E2_2009_2016	Survey	None
E3_2017_2024	Unclassified	None
E3_2017_2024	Unclassified	TRI
E3_2017_2024	Unclassified	None
E3_2017_2024	Unclassified	TRI
E3_2017_2024	Unclassified	None
E2_2009_2016	Survey	None
E3_2017_2024	Qualitative	None
E3_2017_2024	Survey	None
E3_2017_2024	Survey	TAM
E3_2017_2024	Qualitative	None
E3_2017_2024	Unclassified	None
E3_2017_2024	PLS_SEM	None
E2_2009_2016	Unclassified	None
E3_2017_2024	Qualitative	None
E3_2017_2024	Survey	None
E3_2017_2024	Unclassified	None
E2_2009_2016	Unclassified	UTAUT
E3_2017_2024	Unclassified	None
E3_2017_2024	Qualitative	None
E3_2017_2024	Qualitative	None
E3_2017_2024	Unclassified	None
E3_2017_2024	Unclassified	None
E3_2017_2024	Unclassified	None
E3_2017_2024	Survey	UTAUT
E1_2000_2008	Survey	None
E3_2017_2024	Qualitative	None
E3_2017_2024	Unclassified	None
E3_2017_2024	Qualitative	None
E3_2017_2024	Survey	None
E3_2017_2024	Qualitative	None
E3_2017_2024	Qualitative	None
E3_2017_2024	Unclassified	TRI
E3_2017_2024	Unclassified	TRI
E3_2017_2024	Qualitative	None
E2_2009_2016	Survey	TAM
E1_2000_2008	Unclassified	TAM
E3_2017_2024	Unclassified	None
E3_2017_2024	Unclassified	None
E3_2017_2024	Unclassified	None
E3_2017_2024	Unclassified	None
E3_2017_2024	Survey	None
E3_2017_2024	Unclassified	None
E3_2017_2024	Qualitative	None
E3_2017_2024	Survey	None
E3_2017_2024	Survey	TAM
E3_2017_2024	Unclassified	None
E3_2017_2024	Qualitative	None
E3_2017_2024	Unclassified	None
E3_2017_2024	Survey	TAM
E3_2017_2024	Unclassified	None
E2_2009_2016	Unclassified	UTAUT
E2_2009_2016	Unclassified	None
E3_2017_2024	PLS_SEM	None
E3_2017_2024	PLS_SEM	UTAUT
E3_2017_2024	Survey	None
E3_2017_2024	Unclassified	None
E3_2017_2024	Unclassified	TAM
E3_2017_2024	Unclassified	None
E3_2017_2024	Unclassified	TAM
E3_2017_2024	PLS_SEM	UTAUT
E3_2017_2024	Survey	UTAUT
E3_2017_2024	PLS_SEM	TRI
E3_2017_2024	Survey	TRI
E3_2017_2024	Unclassified	None
E3_2017_2024	Unclassified	UTAUT
E3_2017_2024	Unclassified	TAM
E3_2017_2024	Unclassified	None
E3_2017_2024	PLS_SEM	UTAUT
E3_2017_2024	PLS_SEM	TAM
E3_2017_2024	Survey	TAM
E3_2017_2024	Survey	None
E2_2009_2016	Qualitative	None
E3_2017_2024	Unclassified	None
E3_2017_2024	Unclassified	None
E3_2017_2024	Qualitative	None
E3_2017_2024	Survey	None
E3_2017_2024	Qualitative	None
E3_2017_2024	Unclassified	None
E2_2009_2016	Unclassified	None
E3_2017_2024	Unclassified	None
E3_2017_2024	Unclassified	None
E3_2017_2024	Survey	None
E3_2017_2024	Unclassified	None
E3_2017_2024	Unclassified	None
E3_2017_2024	Survey	None
E3_2017_2024	PLS_SEM	None
E3_2017_2024	Qualitative	None
E3_2017_2024	Unclassified	None
E3_2017_2024	Unclassified	None
E3_2017_2024	Unclassified	None
E3_2017_2024	Survey	None
E3_2017_2024	Unclassified	None
E3_2017_2024	Unclassified	None
E3_2017_2024	Unclassified	None
E3_2017_2024	Unclassified	None
E3_2017_2024	Unclassified	None
E3_2017_2024	Unclassified	None
E3_2017_2024	Unclassified	None
E3_2017_2024	Unclassified	None
E3_2017_2024	Unclassified	None
E3_2017_2024	Unclassified	None
E3_2017_2024	Qualitative	None
E3_2017_2024	Unclassified	None
E3_2017_2024	Unclassified	None
E3_2017_2024	Survey	None
E3_2017_2024	Unclassified	None
E3_2017_2024	Unclassified	None
E3_2017_2024	Unclassified	None
E3_2017_2024	Qualitative	None
E3_2017_2024	Qualitative	None
E3_2017_2024	Unclassified	None
E3_2017_2024	Unclassified	None
E3_2017_2024	Unclassified	None
E3_2017_2024	Unclassified	None
E3_2017_2024	Unclassified	None
E3_2017_2024	Unclassified	None
E3_2017_2024	Qualitative	None
[truncated: 1,182 more rows]

## Sheet: Blind_Spots
kw1	kw2	gap
technology transfer	technological change	1
technology transfer	consumer behavior	1
technology transfer	agricultural technology	1
manufacturing	intention to use	1
information management	technological change	1
information management	consumer behavior	1
information management	agricultural technology	1
information management	diffusion	1
utaut	technological change	1
utaut	technology transfer	1
utaut	manufacturing	1
utaut	diffusion	1
technological innovation	structural equation modeling	1
technological innovation	intention to use	1
technological innovation	consumer behavior	1
technological innovation	research work	1
technological innovation	technology transfer	1
technological innovation	diffusion	1
technological innovation	theoretical study	1
technological innovation	information management	1
technology adoption	service quality	1
technology adoption	consumer behaviour	1
technology adoption	customer satisfaction	1
technology adoption	risk assessment	1
technology adoption	germany	1
technology adoption	smart city	1
technology adoption	gas emissions	1
technology adoption	information system	1
technology adoption	environmental impact	1
technology adoption	blockchain technology	1
technology adoption	acceptance	1
technology adoption	e-commerce	1
technological innovation	utaut	1
modeling	emerging technologies	1
modeling	digital technologies	1
modeling	structural equation modeling	1
modeling	intention to use	1
modeling	learning	1
modeling	technological change	1
modeling	research work	1
modeling	agricultural technology	1
modeling	technology transfer	1
modeling	manufacturing	1
modeling	diffusion	1
modeling	information management	1
modeling	utaut	1
modeling	technological innovation	1
agriculture	emerging technologies	1
agriculture	digital technologies	1
agriculture	structural equation modeling	1

## Sheet: Stage_Shift
Year	PostPreRatio
2000	0.625
2001	1.5
2002	1
2003	0.857143
2004	1.28571
2005	0.722222
2006	0.642857
2007	0.947368
2008	0.576923
2009	0.560976
2010	0.717949
2011	0.764706
2012	0.809524
2013	1
2014	1.08163
2015	0.890909
2016	0.958333
2017	1
2018	1.03125
2019	1.10465
2020	1.064
2021	1.33065
2022	1.27083
2023	1.19774
2024	1.20513

## Sheet: Theme_Transition
From	To	Similarity
E1_2000_2008_T1	E2_2009_2016_T2	0.835862
E1_2000_2008_T2	E2_2009_2016_T4	0.73691
E1_2000_2008_T3	E2_2009_2016_T3	0.70547
E1_2000_2008_T4	E2_2009_2016_T1	0.491348
E1_2000_2008_T5	E2_2009_2016_T5	0.583368
E1_2000_2008_T7	E2_2009_2016_T6	0.637847
E2_2009_2016_T1	E3_2017_2024_T6	0.818846
E2_2009_2016_T2	E3_2017_2024_T1	0.573064
E2_2009_2016_T3	E3_2017_2024_T1	0.694012
E2_2009_2016_T4	E3_2017_2024_T3	0.87169
E2_2009_2016_T5	E3_2017_2024_T5	0.801176
E2_2009_2016_T6	E3_2017_2024_T6	0.367796
E2_2009_2016_T7	E3_2017_2024_T4	0.845045
E2_2009_2016_T8	E3_2017_2024_T7	0.973088

## Sheet: Theory_Saturation
Theory	Epoch	Novelty	Entropy	MeanCitations
TAM	E1_2000_2008	5.85366	5.69958	568.951
TAM	E2_2009_2016	5.48691	6.31406	115.445
TAM	E3_2017_2024	6.71119	6.69682	45.1372
TAM3	E2_2009_2016	15	2.70805	279
TAM3	E3_2017_2024	8	2.07944	39
TRI	E1_2000_2008	9.61538	4.72237	347.385
TRI	E2_2009_2016	8.7931	5.37546	95.1379
TRI	E3_2017_2024	9.51456	6.38745	43.9806
UTAUT	E1_2000_2008	11.5	3.13549	241
UTAUT	E2_2009_2016	7.725	5.43126	162.175
UTAUT	E3_2017_2024	6.9281	6.31949	51.0654
