# Supplementary material for: Technology Readiness and Acceptance (2000–2024): A Bibliometric and Systematic Review toward the TRAS Framework
Source: Research Square preprint supplement (doi:10.21203/rs.3.rs-8359750/v1), 2025-12-19
Supplement: Supplementary file 3 [file d43580bc2758bd8219d55e2b.xlsx]

## Sheet: Path_Dependency
FromEpoch	ToEpoch	NextEpoch_entropy	Dominance_entropy_corr_(indicative)
E1_2000_2008	E2_2009_2016	3.4737
E2_2009_2016	E3_2017_2024	3.36806

## Sheet: Theory_Dominance
Epoch	Theory	Papers_in_epoch	Theory_count	Theory_dominance	NextEpoch	NextEpoch_entropy
E1_2000_2008	TAM	265	105	0.396226	E2_2009_2016	3.4737
E1_2000_2008	UTAUT	265	11	0.0415094	E2_2009_2016	3.4737
E1_2000_2008	TRI	265	24	0.090566	E2_2009_2016	3.4737
E1_2000_2008	TAM3	265	0	0	E2_2009_2016	3.4737
E2_2009_2016	TAM	765	237	0.309804	E3_2017_2024	3.36806
E2_2009_2016	UTAUT	765	74	0.096732	E3_2017_2024	3.36806
E2_2009_2016	TRI	765	64	0.0836601	E3_2017_2024	3.36806
E2_2009_2016	TAM3	765	2	0.00261438	E3_2017_2024	3.36806
E3_2017_2024	TAM	1976	361	0.182692
E3_2017_2024	UTAUT	1976	275	0.13917
E3_2017_2024	TRI	1976	182	0.0921053
E3_2017_2024	TAM3	1976	1	0.000506073

## Sheet: Theme_Country
Theme	Country	CiteWeight
Theme 5: health care, mhealth, india, internet of things	india	30
Theme 8: social media, social networking (online), knowledge, psychology	australia	17
Theme 8: social media, social networking (online), knowledge, psychology	india	17
Theme 8: social media, social networking (online), knowledge, psychology	china	17
Theme 8: social media, social networking (online), knowledge, psychology	india	13
Theme 2: china, investments, electric vehicle, electric vehicles	china	56
Theme 6: engineering education, agriculture, agricultural technology, learning	indonesia	6
Theme 5: health care, mhealth, india, internet of things	australia	1
Theme 2: china, investments, electric vehicle, electric vehicles	brazil	57.5
Theme 2: china, investments, electric vehicle, electric vehicles	germany	57.5
Theme 2: china, investments, electric vehicle, electric vehicles	australia	9
Theme 2: china, investments, electric vehicle, electric vehicles	china	9
Theme 2: china, investments, electric vehicle, electric vehicles	china	75
Theme 9: virtual reality, tourism, travel behavior, tourist destination	uae	31
Theme 2: china, investments, electric vehicle, electric vehicles	korea	167
Not Clustered (Low Keyword Overlap)	south africa	9
Theme 9: virtual reality, tourism, travel behavior, tourist destination	egypt	29
Theme 9: virtual reality, tourism, travel behavior, tourist destination	south korea	96
Theme 9: virtual reality, tourism, travel behavior, tourist destination	united states	16
Theme 9: virtual reality, tourism, travel behavior, tourist destination	south korea	16
Theme 9: virtual reality, tourism, travel behavior, tourist destination	italy	40
Theme 2: china, investments, electric vehicle, electric vehicles	china	17
Theme 2: china, investments, electric vehicle, electric vehicles	china	31
Theme 2: china, investments, electric vehicle, electric vehicles	china	3
Theme 2: china, investments, electric vehicle, electric vehicles	uae	5
Theme 5: health care, mhealth, india, internet of things	malaysia	32
Theme 5: health care, mhealth, india, internet of things	india	30
Theme 5: health care, mhealth, india, internet of things	india	57
Theme 5: health care, mhealth, india, internet of things	india	186
Theme 10: retailing, mobile phone, shopping activity, social influence	france	29
Theme 10: retailing, mobile phone, shopping activity, social influence	pakistan	108
Theme 2: china, investments, electric vehicle, electric vehicles	thailand	60.5
Theme 2: china, investments, electric vehicle, electric vehicles	australia	60.5
Theme 5: health care, mhealth, india, internet of things	india	332
Theme 9: virtual reality, tourism, travel behavior, tourist destination	egypt	168
Theme 2: china, investments, electric vehicle, electric vehicles	united states	1
Theme 9: virtual reality, tourism, travel behavior, tourist destination	china	15
Theme 9: virtual reality, tourism, travel behavior, tourist destination	thailand	57
Theme 10: retailing, mobile phone, shopping activity, social influence	saudi arabia	39
Theme 2: china, investments, electric vehicle, electric vehicles	japan	76
Theme 6: engineering education, agriculture, agricultural technology, learning	china	3
Theme 6: engineering education, agriculture, agricultural technology, learning	italy	24
Theme 2: china, investments, electric vehicle, electric vehicles	south korea	9.5
Theme 2: china, investments, electric vehicle, electric vehicles	korea	9.5
Theme 5: health care, mhealth, india, internet of things	nigeria	9
Theme 9: virtual reality, tourism, travel behavior, tourist destination	china	11.6667
Theme 9: virtual reality, tourism, travel behavior, tourist destination	germany	11.6667
Theme 9: virtual reality, tourism, travel behavior, tourist destination	italy	11.6667
Theme 9: virtual reality, tourism, travel behavior, tourist destination	singapore	11.6667
Theme 9: virtual reality, tourism, travel behavior, tourist destination	south korea	11.6667
Theme 9: virtual reality, tourism, travel behavior, tourist destination	united states	11.6667
Theme 10: retailing, mobile phone, shopping activity, social influence	singapore	11
Theme 8: social media, social networking (online), knowledge, psychology	italy	32
Theme 8: social media, social networking (online), knowledge, psychology	sweden	32
Theme 9: virtual reality, tourism, travel behavior, tourist destination	united states	82
Theme 5: health care, mhealth, india, internet of things	india	24
Theme 8: social media, social networking (online), knowledge, psychology	vietnam	11
Theme 8: social media, social networking (online), knowledge, psychology	italy	27
Theme 10: retailing, mobile phone, shopping activity, social influence	india	1
Theme 9: virtual reality, tourism, travel behavior, tourist destination	south africa	91
Theme 9: virtual reality, tourism, travel behavior, tourist destination	india	50
Theme 9: virtual reality, tourism, travel behavior, tourist destination	iran	33
Theme 2: china, investments, electric vehicle, electric vehicles	south korea	291
Theme 5: health care, mhealth, india, internet of things	singapore	3
Theme 10: retailing, mobile phone, shopping activity, social influence	israel	1
Theme 10: retailing, mobile phone, shopping activity, social influence	australia	30
Theme 10: retailing, mobile phone, shopping activity, social influence	spain	117
Theme 5: health care, mhealth, india, internet of things	india	62
Theme 8: social media, social networking (online), knowledge, psychology	china	32
Theme 2: china, investments, electric vehicle, electric vehicles	china	51
Theme 2: china, investments, electric vehicle, electric vehicles	china	23
Theme 10: retailing, mobile phone, shopping activity, social influence	china	65
Theme 10: retailing, mobile phone, shopping activity, social influence	uae	8
Theme 9: virtual reality, tourism, travel behavior, tourist destination	italy	96
Theme 9: virtual reality, tourism, travel behavior, tourist destination	germany	96
Theme 2: china, investments, electric vehicle, electric vehicles	china	1
Theme 2: china, investments, electric vehicle, electric vehicles	china	16
Theme 2: china, investments, electric vehicle, electric vehicles	china	54
Theme 2: china, investments, electric vehicle, electric vehicles	india	13
Theme 2: china, investments, electric vehicle, electric vehicles	sweden	99
Theme 2: china, investments, electric vehicle, electric vehicles	canada	15
Theme 2: china, investments, electric vehicle, electric vehicles	korea	18
Theme 2: china, investments, electric vehicle, electric vehicles	kenya	16
Theme 2: china, investments, electric vehicle, electric vehicles	united states	46
Theme 2: china, investments, electric vehicle, electric vehicles	india	33
Theme 2: china, investments, electric vehicle, electric vehicles	china	14
Theme 2: china, investments, electric vehicle, electric vehicles	india	1
Theme 2: china, investments, electric vehicle, electric vehicles	south korea	38
Theme 5: health care, mhealth, india, internet of things	india	1
Theme 2: china, investments, electric vehicle, electric vehicles	china	1
Theme 2: china, investments, electric vehicle, electric vehicles	china	5
Theme 2: china, investments, electric vehicle, electric vehicles	china	1
Theme 2: china, investments, electric vehicle, electric vehicles	india	1
Theme 2: china, investments, electric vehicle, electric vehicles	indonesia	0.333333
Theme 2: china, investments, electric vehicle, electric vehicles	malaysia	0.333333
Theme 2: china, investments, electric vehicle, electric vehicles	korea	0.333333
Theme 2: china, investments, electric vehicle, electric vehicles	china	1
Theme 5: health care, mhealth, india, internet of things	uae	81
Theme 2: china, investments, electric vehicle, electric vehicles	united states	32
Theme 8: social media, social networking (online), knowledge, psychology	united states	8
Theme 8: social media, social networking (online), knowledge, psychology	france	3
Theme 2: china, investments, electric vehicle, electric vehicles	china	31
Theme 2: china, investments, electric vehicle, electric vehicles	united states	1
Theme 6: engineering education, agriculture, agricultural technology, learning	china	17
Theme 2: china, investments, electric vehicle, electric vehicles	china	16
Theme 6: engineering education, agriculture, agricultural technology, learning	india	38
Theme 2: china, investments, electric vehicle, electric vehicles	china	194
Theme 2: china, investments, electric vehicle, electric vehicles	india	8
Theme 2: china, investments, electric vehicle, electric vehicles	china	34
Theme 5: health care, mhealth, india, internet of things	india	175
Theme 2: china, investments, electric vehicle, electric vehicles	germany	24
Theme 2: china, investments, electric vehicle, electric vehicles	china	15
Theme 10: retailing, mobile phone, shopping activity, social influence	india	60
Theme 2: china, investments, electric vehicle, electric vehicles	china	89
Theme 8: social media, social networking (online), knowledge, psychology	china	110
Theme 2: china, investments, electric vehicle, electric vehicles	germany	10
Theme 2: china, investments, electric vehicle, electric vehicles	china	13
Theme 5: health care, mhealth, india, internet of things	italy	19
Theme 2: china, investments, electric vehicle, electric vehicles	india	16
Theme 2: china, investments, electric vehicle, electric vehicles	china	26
Theme 8: social media, social networking (online), knowledge, psychology	brazil	7.5
Theme 8: social media, social networking (online), knowledge, psychology	germany	7.5
Theme 2: china, investments, electric vehicle, electric vehicles	china	73
Theme 2: china, investments, electric vehicle, electric vehicles	france	2.57143
Theme 2: china, investments, electric vehicle, electric vehicles	germany	2.57143
Theme 2: china, investments, electric vehicle, electric vehicles	italy	2.57143
Theme 2: china, investments, electric vehicle, electric vehicles	norway	2.57143
Theme 2: china, investments, electric vehicle, electric vehicles	spain	2.57143
Theme 2: china, investments, electric vehicle, electric vehicles	turkey	2.57143
Theme 2: china, investments, electric vehicle, electric vehicles	united kingdom	2.57143
Theme 2: china, investments, electric vehicle, electric vehicles	china	40
Theme 2: china, investments, electric vehicle, electric vehicles	india	11
Theme 8: social media, social networking (online), knowledge, psychology	nigeria	9
Theme 8: social media, social networking (online), knowledge, psychology	south africa	9
Theme 8: social media, social networking (online), knowledge, psychology	kenya	9
Theme 10: retailing, mobile phone, shopping activity, social influence	russia	15
Theme 5: health care, mhealth, india, internet of things	india	42
Theme 5: health care, mhealth, india, internet of things	brazil	11.75
Theme 5: health care, mhealth, india, internet of things	india	11.75
Theme 5: health care, mhealth, india, internet of things	mexico	11.75
Theme 5: health care, mhealth, india, internet of things	argentina	11.75
Theme 2: china, investments, electric vehicle, electric vehicles	china	21
Theme 2: china, investments, electric vehicle, electric vehicles	kenya	30
Theme 2: china, investments, electric vehicle, electric vehicles	china	77
Theme 5: health care, mhealth, india, internet of things	india	166
Theme 2: china, investments, electric vehicle, electric vehicles	russia	33
Theme 2: china, investments, electric vehicle, electric vehicles	china	271
Theme 6: engineering education, agriculture, agricultural technology, learning	finland	22
Theme 5: health care, mhealth, india, internet of things	spain	73
Theme 2: china, investments, electric vehicle, electric vehicles	netherlands	3
Theme 2: china, investments, electric vehicle, electric vehicles	germany	3
Theme 2: china, investments, electric vehicle, electric vehicles	china	9.5
Theme 2: china, investments, electric vehicle, electric vehicles	denmark	9.5
Theme 2: china, investments, electric vehicle, electric vehicles	germany	9.5
Theme 2: china, investments, electric vehicle, electric vehicles	united states	9.5
Theme 5: health care, mhealth, india, internet of things	malaysia	28
Theme 2: china, investments, electric vehicle, electric vehicles	china	36
Theme 8: social media, social networking (online), knowledge, psychology	italy	60
Theme 8: social media, social networking (online), knowledge, psychology	united kingdom	60
Theme 10: retailing, mobile phone, shopping activity, social influence	united states	303
Theme 2: china, investments, electric vehicle, electric vehicles	iran	18
Theme 9: virtual reality, tourism, travel behavior, tourist destination	south korea	118
Theme 2: china, investments, electric vehicle, electric vehicles	united states	57
Theme 2: china, investments, electric vehicle, electric vehicles	china	33
Theme 6: engineering education, agriculture, agricultural technology, learning	germany	34
Theme 2: china, investments, electric vehicle, electric vehicles	united states	84
Theme 9: virtual reality, tourism, travel behavior, tourist destination	china	19
Theme 9: virtual reality, tourism, travel behavior, tourist destination	south korea	19
Theme 9: virtual reality, tourism, travel behavior, tourist destination	united kingdom	19
Theme 2: china, investments, electric vehicle, electric vehicles	united states	41
Theme 8: social media, social networking (online), knowledge, psychology	united kingdom	28
Theme 2: china, investments, electric vehicle, electric vehicles	china	84
Theme 5: health care, mhealth, india, internet of things	india	89
Theme 2: china, investments, electric vehicle, electric vehicles	india	5
Theme 2: china, investments, electric vehicle, electric vehicles	china	5
Theme 2: china, investments, electric vehicle, electric vehicles	australia	85
Theme 6: engineering education, agriculture, agricultural technology, learning	israel	40
Theme 2: china, investments, electric vehicle, electric vehicles	china	6
Theme 2: china, investments, electric vehicle, electric vehicles	australia	37
Theme 2: china, investments, electric vehicle, electric vehicles	china	4
Theme 2: china, investments, electric vehicle, electric vehicles	mexico	4
Theme 2: china, investments, electric vehicle, electric vehicles	canada	46
Theme 2: china, investments, electric vehicle, electric vehicles	italy	120
Theme 2: china, investments, electric vehicle, electric vehicles	china	46
Theme 2: china, investments, electric vehicle, electric vehicles	china	11
Theme 2: china, investments, electric vehicle, electric vehicles	malaysia	11
Theme 2: china, investments, electric vehicle, electric vehicles	iran	11
Theme 2: china, investments, electric vehicle, electric vehicles	bangladesh	11
Theme 6: engineering education, agriculture, agricultural technology, learning	india	13
Theme 2: china, investments, electric vehicle, electric vehicles	korea	33
Theme 6: engineering education, agriculture, agricultural technology, learning	bangladesh	13
Theme 5: health care, mhealth, india, internet of things	thailand	1
Theme 2: china, investments, electric vehicle, electric vehicles	bangladesh	1
Theme 5: health care, mhealth, india, internet of things	china	71
Theme 2: china, investments, electric vehicle, electric vehicles	china	5
Theme 2: china, investments, electric vehicle, electric vehicles	germany	6
Theme 2: china, investments, electric vehicle, electric vehicles	spain	6
Theme 6: engineering education, agriculture, agricultural technology, learning	italy	7
Theme 6: engineering education, agriculture, agricultural technology, learning	united kingdom	7
Theme 5: health care, mhealth, india, internet of things	netherlands	15
Theme 2: china, investments, electric vehicle, electric vehicles	iran	6
Theme 2: china, investments, electric vehicle, electric vehicles	china	66
Theme 2: china, investments, electric vehicle, electric vehicles	china	66
Theme 2: china, investments, electric vehicle, electric vehicles	china	12
Theme 5: health care, mhealth, india, internet of things	france	79
Theme 5: health care, mhealth, india, internet of things	china	11
Theme 6: engineering education, agriculture, agricultural technology, learning	united states	29
Theme 2: china, investments, electric vehicle, electric vehicles	germany	76
Theme 5: health care, mhealth, india, internet of things	germany	3
Theme 2: china, investments, electric vehicle, electric vehicles	malaysia	357
Not Clustered (Low Keyword Overlap)	united states	1
Not Clustered (Low Keyword Overlap)	australia	1
Not Clustered (Low Keyword Overlap)	canada	1
Theme 8: social media, social networking (online), knowledge, psychology	china	6
Theme 5: health care, mhealth, india, internet of things	vietnam	18
Theme 9: virtual reality, tourism, travel behavior, tourist destination	china	9
Theme 9: virtual reality, tourism, travel behavior, tourist destination	south korea	65
Theme 9: virtual reality, tourism, travel behavior, tourist destination	china	15
Theme 9: virtual reality, tourism, travel behavior, tourist destination	south korea	94
Theme 9: virtual reality, tourism, travel behavior, tourist destination	malaysia	7
Theme 10: retailing, mobile phone, shopping activity, social influence	iran	4
Theme 9: virtual reality, tourism, travel behavior, tourist destination	korea	42
Theme 9: virtual reality, tourism, travel behavior, tourist destination	china	1
Theme 2: china, investments, electric vehicle, electric vehicles	china	31
Theme 2: china, investments, electric vehicle, electric vehicles	australia	27
Theme 8: social media, social networking (online), knowledge, psychology	australia	23
Theme 5: health care, mhealth, india, internet of things	nigeria	1
Theme 5: health care, mhealth, india, internet of things	australia	1
Theme 2: china, investments, electric vehicle, electric vehicles	spain	1
Theme 2: china, investments, electric vehicle, electric vehicles	japan	5
Theme 2: china, investments, electric vehicle, electric vehicles	australia	14.5
Theme 2: china, investments, electric vehicle, electric vehicles	sweden	14.5
Theme 2: china, investments, electric vehicle, electric vehicles	united states	11
Theme 10: retailing, mobile phone, shopping activity, social influence	india	36
Theme 2: china, investments, electric vehicle, electric vehicles	china	6
Theme 8: social media, social networking (online), knowledge, psychology	china	74.5
Theme 8: social media, social networking (online), knowledge, psychology	united states	74.5
Theme 5: health care, mhealth, india, internet of things	united states	24
Theme 5: health care, mhealth, india, internet of things	spain	16
Theme 2: china, investments, electric vehicle, electric vehicles	china	2
Theme 2: china, investments, electric vehicle, electric vehicles	brazil	2
Theme 5: health care, mhealth, india, internet of things	china	16
Theme 2: china, investments, electric vehicle, electric vehicles	malaysia	11
Theme 10: retailing, mobile phone, shopping activity, social influence	united states	14
Theme 8: social media, social networking (online), knowledge, psychology	india	129
Theme 2: china, investments, electric vehicle, electric vehicles	china	60
Theme 10: retailing, mobile phone, shopping activity, social influence	china	11
Theme 2: china, investments, electric vehicle, electric vehicles	singapore	1
Theme 6: engineering education, agriculture, agricultural technology, learning	malaysia	6
Theme 2: china, investments, electric vehicle, electric vehicles	pakistan	23
Theme 2: china, investments, electric vehicle, electric vehicles	china	18
Theme 2: china, investments, electric vehicle, electric vehicles	australia	5
Theme 2: china, investments, electric vehicle, electric vehicles	china	36
Theme 2: china, investments, electric vehicle, electric vehicles	pakistan	10
Theme 2: china, investments, electric vehicle, electric vehicles	china	20.6667
Theme 2: china, investments, electric vehicle, electric vehicles	brazil	20.6667
Theme 2: china, investments, electric vehicle, electric vehicles	russia	20.6667
Theme 2: china, investments, electric vehicle, electric vehicles	denmark	14.5
Theme 2: china, investments, electric vehicle, electric vehicles	italy	14.5
Theme 2: china, investments, electric vehicle, electric vehicles	netherlands	14.5
Theme 2: china, investments, electric vehicle, electric vehicles	spain	14.5
Theme 2: china, investments, electric vehicle, electric vehicles	china	16
Theme 6: engineering education, agriculture, agricultural technology, learning	china	15
Theme 2: china, investments, electric vehicle, electric vehicles	germany	17
Theme 2: china, investments, electric vehicle, electric vehicles	india	2.33333
Theme 2: china, investments, electric vehicle, electric vehicles	japan	2.33333
Theme 2: china, investments, electric vehicle, electric vehicles	thailand	2.33333
Theme 2: china, investments, electric vehicle, electric vehicles	sweden	9
Theme 2: china, investments, electric vehicle, electric vehicles	spain	5
Theme 2: china, investments, electric vehicle, electric vehicles	pakistan	5
Theme 2: china, investments, electric vehicle, electric vehicles	china	8
Theme 2: china, investments, electric vehicle, electric vehicles	china	34
Theme 2: china, investments, electric vehicle, electric vehicles	south africa	8
Theme 2: china, investments, electric vehicle, electric vehicles	italy	10
Theme 2: china, investments, electric vehicle, electric vehicles	china	2
Theme 5: health care, mhealth, india, internet of things	china	41
Theme 2: china, investments, electric vehicle, electric vehicles	indonesia	8
Theme 2: china, investments, electric vehicle, electric vehicles	china	61
Theme 2: china, investments, electric vehicle, electric vehicles	malaysia	221
Theme 2: china, investments, electric vehicle, electric vehicles	china	1
Theme 2: china, investments, electric vehicle, electric vehicles	australia	1
Theme 2: china, investments, electric vehicle, electric vehicles	vietnam	1
Theme 2: china, investments, electric vehicle, electric vehicles	malaysia	5
Theme 2: china, investments, electric vehicle, electric vehicles	japan	0.333333
Theme 2: china, investments, electric vehicle, electric vehicles	china	0.333333
Theme 2: china, investments, electric vehicle, electric vehicles	south korea	0.333333
Theme 2: china, investments, electric vehicle, electric vehicles	china	9
Theme 8: social media, social networking (online), knowledge, psychology	china	10
Theme 2: china, investments, electric vehicle, electric vehicles	germany	4.33333
Theme 2: china, investments, electric vehicle, electric vehicles	spain	4.33333
Theme 2: china, investments, electric vehicle, electric vehicles	sweden	4.33333
Theme 2: china, investments, electric vehicle, electric vehicles	united states	2.75
Theme 2: china, investments, electric vehicle, electric vehicles	china	2.75
Theme 2: china, investments, electric vehicle, electric vehicles	turkey	2.75
Theme 2: china, investments, electric vehicle, electric vehicles	israel	2.75
Theme 8: social media, social networking (online), knowledge, psychology	china	28
Theme 2: china, investments, electric vehicle, electric vehicles	mexico	26
Theme 2: china, investments, electric vehicle, electric vehicles	china	38
Theme 2: china, investments, electric vehicle, electric vehicles	malaysia	57
Theme 8: social media, social networking (online), knowledge, psychology	china	70
Theme 2: china, investments, electric vehicle, electric vehicles	united states	6.75
Theme 2: china, investments, electric vehicle, electric vehicles	china	6.75
Theme 2: china, investments, electric vehicle, electric vehicles	denmark	6.75
Theme 2: china, investments, electric vehicle, electric vehicles	netherlands	6.75
Theme 2: china, investments, electric vehicle, electric vehicles	australia	37
Theme 2: china, investments, electric vehicle, electric vehicles	germany	74
Theme 2: china, investments, electric vehicle, electric vehicles	iran	70
Theme 2: china, investments, electric vehicle, electric vehicles	china	41
Theme 2: china, investments, electric vehicle, electric vehicles	germany	38
Theme 2: china, investments, electric vehicle, electric vehicles	china	182
Theme 2: china, investments, electric vehicle, electric vehicles	brazil	29
Theme 2: china, investments, electric vehicle, electric vehicles	china	17
Theme 2: china, investments, electric vehicle, electric vehicles	iran	1
Theme 5: health care, mhealth, india, internet of things	korea	23
Theme 2: china, investments, electric vehicle, electric vehicles	germany	2.5
Theme 2: china, investments, electric vehicle, electric vehicles	china	2.5
Theme 9: virtual reality, tourism, travel behavior, tourist destination	united states	28
Theme 10: retailing, mobile phone, shopping activity, social influence	united states	26
Theme 5: health care, mhealth, india, internet of things	india	5
Theme 2: china, investments, electric vehicle, electric vehicles	singapore	17
Theme 2: china, investments, electric vehicle, electric vehicles	singapore	6
Theme 2: china, investments, electric vehicle, electric vehicles	australia	7
Theme 2: china, investments, electric vehicle, electric vehicles	united kingdom	6
Theme 2: china, investments, electric vehicle, electric vehicles	australia	6
Theme 2: china, investments, electric vehicle, electric vehicles	netherlands	6
Theme 8: social media, social networking (online), knowledge, psychology	united states	23
Theme 2: china, investments, electric vehicle, electric vehicles	india	7
Theme 8: social media, social networking (online), knowledge, psychology	denmark	32.25
Theme 8: social media, social networking (online), knowledge, psychology	norway	32.25
Theme 8: social media, social networking (online), knowledge, psychology	finland	32.25
Theme 8: social media, social networking (online), knowledge, psychology	sweden	32.25
Theme 9: virtual reality, tourism, travel behavior, tourist destination	south korea	56
Theme 2: china, investments, electric vehicle, electric vehicles	spain	11
Theme 9: virtual reality, tourism, travel behavior, tourist destination	spain	85
Theme 9: virtual reality, tourism, travel behavior, tourist destination	south africa	7
Theme 2: china, investments, electric vehicle, electric vehicles	china	4
Theme 2: china, investments, electric vehicle, electric vehicles	china	2
Theme 5: health care, mhealth, india, internet of things	united states	2
Theme 2: china, investments, electric vehicle, electric vehicles	china	1
Theme 2: china, investments, electric vehicle, electric vehicles	china	4
Theme 2: china, investments, electric vehicle, electric vehicles	china	15
Theme 2: china, investments, electric vehicle, electric vehicles	brazil	24
Theme 2: china, investments, electric vehicle, electric vehicles	china	47
Theme 2: china, investments, electric vehicle, electric vehicles	canada	42
Theme 2: china, investments, electric vehicle, electric vehicles	singapore	63
Theme 2: china, investments, electric vehicle, electric vehicles	vietnam	67
Theme 2: china, investments, electric vehicle, electric vehicles	germany	17
Theme 2: china, investments, electric vehicle, electric vehicles	sweden	32
Theme 2: china, investments, electric vehicle, electric vehicles	china	3
Theme 2: china, investments, electric vehicle, electric vehicles	united kingdom	2
Theme 2: china, investments, electric vehicle, electric vehicles	china	10.3333
Theme 2: china, investments, electric vehicle, electric vehicles	india	10.3333
Theme 2: china, investments, electric vehicle, electric vehicles	united states	10.3333
Theme 2: china, investments, electric vehicle, electric vehicles	australia	22
Theme 2: china, investments, electric vehicle, electric vehicles	china	85
Theme 3: construction industry, project management, united kingdom, information and communication technologies	singapore	31
Theme 3: construction industry, project management, united kingdom, information and communication technologies	china	90
Theme 3: construction industry, project management, united kingdom, information and communication technologies	malaysia	43
Theme 3: construction industry, project management, united kingdom, information and communication technologies	italy	26
Theme 3: construction industry, project management, united kingdom, information and communication technologies	china	15
Theme 3: construction industry, project management, united kingdom, information and communication technologies	china	7
Theme 3: construction industry, project management, united kingdom, information and communication technologies	china	1
Theme 3: construction industry, project management, united kingdom, information and communication technologies	south africa	6
Theme 3: construction industry, project management, united kingdom, information and communication technologies	china	7
Theme 3: construction industry, project management, united kingdom, information and communication technologies	china	16
Theme 3: construction industry, project management, united kingdom, information and communication technologies	nigeria	78
Theme 3: construction industry, project management, united kingdom, information and communication technologies	korea	24
Theme 4: supply chain management, supply chains, blockchain, costs	australia	3
Theme 3: construction industry, project management, united kingdom, information and communication technologies	netherlands	102
Theme 7: mobile communication, banking, mobile payment, mobile banking	united states	454
Theme 7: mobile communication, banking, mobile payment, mobile banking	india	10
Theme 4: supply chain management, supply chains, blockchain, costs	india	59
Theme 3: construction industry, project management, united kingdom, information and communication technologies	india	21
Theme 7: mobile communication, banking, mobile payment, mobile banking	indonesia	52
Theme 4: supply chain management, supply chains, blockchain, costs	india	633
Theme 3: construction industry, project management, united kingdom, information and communication technologies	pakistan	35.5
Theme 3: construction industry, project management, united kingdom, information and communication technologies	turkey	35.5
Theme 3: construction industry, project management, united kingdom, information and communication technologies	united states	7
Theme 7: mobile communication, banking, mobile payment, mobile banking	china	5.5
Theme 7: mobile communication, banking, mobile payment, mobile banking	united states	5.5
Theme 7: mobile communication, banking, mobile payment, mobile banking	egypt	49
Theme 7: mobile communication, banking, mobile payment, mobile banking	india	100
Theme 7: mobile communication, banking, mobile payment, mobile banking	saudi arabia	80
Theme 7: mobile communication, banking, mobile payment, mobile banking	india	41
Theme 7: mobile communication, banking, mobile payment, mobile banking	pakistan	87
Theme 7: mobile communication, banking, mobile payment, mobile banking	germany	425
Theme 7: mobile communication, banking, mobile payment, mobile banking	turkey	43
Theme 7: mobile communication, banking, mobile payment, mobile banking	south korea	6
Theme 7: mobile communication, banking, mobile payment, mobile banking	china	6
Theme 3: construction industry, project management, united kingdom, information and communication technologies	brazil	26
Theme 7: mobile communication, banking, mobile payment, mobile banking	spain	42
Theme 3: construction industry, project management, united kingdom, information and communication technologies	germany	92
Theme 3: construction industry, project management, united kingdom, information and communication technologies	china	52
Theme 3: construction industry, project management, united kingdom, information and communication technologies	united states	35
Theme 7: mobile communication, banking, mobile payment, mobile banking	china	6.5
Theme 7: mobile communication, banking, mobile payment, mobile banking	korea	6.5
Theme 7: mobile communication, banking, mobile payment, mobile banking	united states	329
Theme 7: mobile communication, banking, mobile payment, mobile banking	united states	121
Theme 3: construction industry, project management, united kingdom, information and communication technologies	brazil	64
Theme 3: construction industry, project management, united kingdom, information and communication technologies	united kingdom	108.5
Theme 3: construction industry, project management, united kingdom, information and communication technologies	saudi arabia	108.5
Theme 4: supply chain management, supply chains, blockchain, costs	india	225
Theme 3: construction industry, project management, united kingdom, information and communication technologies	china	54.5
Theme 3: construction industry, project management, united kingdom, information and communication technologies	india	54.5
Theme 7: mobile communication, banking, mobile payment, mobile banking	china	84
Theme 7: mobile communication, banking, mobile payment, mobile banking	spain	83
Theme 4: supply chain management, supply chains, blockchain, costs	united kingdom	41
Theme 7: mobile communication, banking, mobile payment, mobile banking	india	1
Theme 3: construction industry, project management, united kingdom, information and communication technologies	malaysia	6
Theme 3: construction industry, project management, united kingdom, information and communication technologies	uae	16
Theme 3: construction industry, project management, united kingdom, information and communication technologies	egypt	16
Theme 4: supply chain management, supply chains, blockchain, costs	thailand	60
Theme 3: construction industry, project management, united kingdom, information and communication technologies	malaysia	66
Theme 7: mobile communication, banking, mobile payment, mobile banking	france	9
Theme 7: mobile communication, banking, mobile payment, mobile banking	bangladesh	154
Theme 4: supply chain management, supply chains, blockchain, costs	india	7
Theme 7: mobile communication, banking, mobile payment, mobile banking	kenya	1
Theme 4: supply chain management, supply chains, blockchain, costs	india	2
Theme 3: construction industry, project management, united kingdom, information and communication technologies	brazil	21
Theme 7: mobile communication, banking, mobile payment, mobile banking	spain	13
Theme 4: supply chain management, supply chains, blockchain, costs	india	31
Theme 7: mobile communication, banking, mobile payment, mobile banking	kenya	18.5
Theme 7: mobile communication, banking, mobile payment, mobile banking	nigeria	18.5
Theme 3: construction industry, project management, united kingdom, information and communication technologies	netherlands	17
Theme 7: mobile communication, banking, mobile payment, mobile banking	spain	85
Theme 7: mobile communication, banking, mobile payment, mobile banking	korea	17
Theme 4: supply chain management, supply chains, blockchain, costs	korea	5
Theme 4: supply chain management, supply chains, blockchain, costs	south korea	5
Theme 7: mobile communication, banking, mobile payment, mobile banking	korea	19
Theme 4: supply chain management, supply chains, blockchain, costs	south korea	1
Theme 3: construction industry, project management, united kingdom, information and communication technologies	canada	1
Theme 4: supply chain management, supply chains, blockchain, costs	united states	1
Theme 3: construction industry, project management, united kingdom, information and communication technologies	bangladesh	74
Theme 7: mobile communication, banking, mobile payment, mobile banking	turkey	19
Theme 3: construction industry, project management, united kingdom, information and communication technologies	finland	16
Theme 3: construction industry, project management, united kingdom, information and communication technologies	netherlands	40
Theme 4: supply chain management, supply chains, blockchain, costs	south korea	99
Theme 3: construction industry, project management, united kingdom, information and communication technologies	bangladesh	182
Theme 3: construction industry, project management, united kingdom, information and communication technologies	malaysia	11
Theme 3: construction industry, project management, united kingdom, information and communication technologies	china	25
Theme 3: construction industry, project management, united kingdom, information and communication technologies	united states	66
Theme 7: mobile communication, banking, mobile payment, mobile banking	india	323
Theme 4: supply chain management, supply chains, blockchain, costs	south korea	20
Theme 3: construction industry, project management, united kingdom, information and communication technologies	china	23
Theme 7: mobile communication, banking, mobile payment, mobile banking	india	278
Theme 3: construction industry, project management, united kingdom, information and communication technologies	bangladesh	156
Theme 3: construction industry, project management, united kingdom, information and communication technologies	uae	125
Theme 4: supply chain management, supply chains, blockchain, costs	australia	15.5
Theme 4: supply chain management, supply chains, blockchain, costs	bangladesh	15.5
Theme 3: construction industry, project management, united kingdom, information and communication technologies	malaysia	332
Theme 7: mobile communication, banking, mobile payment, mobile banking	india	10
Theme 3: construction industry, project management, united kingdom, information and communication technologies	malaysia	75
Theme 3: construction industry, project management, united kingdom, information and communication technologies	malaysia	48
Theme 3: construction industry, project management, united kingdom, information and communication technologies	malaysia	125
Theme 4: supply chain management, supply chains, blockchain, costs	australia	1
Theme 7: mobile communication, banking, mobile payment, mobile banking	australia	9
Theme 3: construction industry, project management, united kingdom, information and communication technologies	malaysia	14
Theme 3: construction industry, project management, united kingdom, information and communication technologies	united kingdom	79
Theme 3: construction industry, project management, united kingdom, information and communication technologies	sweden	28
Theme 7: mobile communication, banking, mobile payment, mobile banking	china	56
Theme 3: construction industry, project management, united kingdom, information and communication technologies	china	12
Theme 3: construction industry, project management, united kingdom, information and communication technologies	canada	320
Theme 3: construction industry, project management, united kingdom, information and communication technologies	china	210
Theme 3: construction industry, project management, united kingdom, information and communication technologies	malaysia	210
Theme 3: construction industry, project management, united kingdom, information and communication technologies	kenya	2
Theme 4: supply chain management, supply chains, blockchain, costs	singapore	3
Theme 3: construction industry, project management, united kingdom, information and communication technologies	germany	3
Theme 4: supply chain management, supply chains, blockchain, costs	australia	29
Theme 4: supply chain management, supply chains, blockchain, costs	pakistan	43
Theme 3: construction industry, project management, united kingdom, information and communication technologies	spain	34
Theme 3: construction industry, project management, united kingdom, information and communication technologies	turkey	108
Theme 4: supply chain management, supply chains, blockchain, costs	india	508
Theme 3: construction industry, project management, united kingdom, information and communication technologies	china	45
Theme 3: construction industry, project management, united kingdom, information and communication technologies	iran	2
Theme 4: supply chain management, supply chains, blockchain, costs	china	1
Theme 3: construction industry, project management, united kingdom, information and communication technologies	malaysia	51
Theme 4: supply chain management, supply chains, blockchain, costs	china	25
Theme 3: construction industry, project management, united kingdom, information and communication technologies	italy	9
Theme 3: construction industry, project management, united kingdom, information and communication technologies	netherlands	9
Theme 4: supply chain management, supply chains, blockchain, costs	australia	2.25
Theme 4: supply chain management, supply chains, blockchain, costs	india	2.25
Theme 4: supply chain management, supply chains, blockchain, costs	singapore	2.25
Theme 4: supply chain management, supply chains, blockchain, costs	united states	2.25
Theme 7: mobile communication, banking, mobile payment, mobile banking	india	1
Theme 3: construction industry, project management, united kingdom, information and communication technologies	china	4
Theme 3: construction industry, project management, united kingdom, information and communication technologies	singapore	2
Theme 4: supply chain management, supply chains, blockchain, costs	brazil	2
Theme 3: construction industry, project management, united kingdom, information and communication technologies	india	9
Theme 4: supply chain management, supply chains, blockchain, costs	china	25
Theme 3: construction industry, project management, united kingdom, information and communication technologies	brazil	22
Theme 3: construction industry, project management, united kingdom, information and communication technologies	germany	13
Theme 4: supply chain management, supply chains, blockchain, costs	denmark	6.33333
Theme 4: supply chain management, supply chains, blockchain, costs	china	6.33333
Theme 4: supply chain management, supply chains, blockchain, costs	australia	6.33333
Theme 4: supply chain management, supply chains, blockchain, costs	netherlands	20
Theme 3: construction industry, project management, united kingdom, information and communication technologies	china	83
Theme 3: construction industry, project management, united kingdom, information and communication technologies	brazil	30
Theme 4: supply chain management, supply chains, blockchain, costs	china	6
Theme 4: supply chain management, supply chains, blockchain, costs	japan	6
Theme 4: supply chain management, supply chains, blockchain, costs	iran	90
Theme 3: construction industry, project management, united kingdom, information and communication technologies	china	84
Theme 4: supply chain management, supply chains, blockchain, costs	china	3
Theme 3: construction industry, project management, united kingdom, information and communication technologies	netherlands	4
Theme 3: construction industry, project management, united kingdom, information and communication technologies	australia	1
Theme 3: construction industry, project management, united kingdom, information and communication technologies	korea	41
Theme 3: construction industry, project management, united kingdom, information and communication technologies	united states	41
Theme 3: construction industry, project management, united kingdom, information and communication technologies	united kingdom	101
Theme 3: construction industry, project management, united kingdom, information and communication technologies	uae	11
Theme 7: mobile communication, banking, mobile payment, mobile banking	brazil	2
Theme 7: mobile communication, banking, mobile payment, mobile banking	south korea	2
Theme 7: mobile communication, banking, mobile payment, mobile banking	united states	2
Theme 7: mobile communication, banking, mobile payment, mobile banking	korea	3
Theme 4: supply chain management, supply chains, blockchain, costs	united states	7
Theme 3: construction industry, project management, united kingdom, information and communication technologies	france	0.5
Theme 3: construction industry, project management, united kingdom, information and communication technologies	south africa	0.5
Theme 7: mobile communication, banking, mobile payment, mobile banking	vietnam	2
Theme 3: construction industry, project management, united kingdom, information and communication technologies	france	1
Theme 3: construction industry, project management, united kingdom, information and communication technologies	mexico	1
Theme 3: construction industry, project management, united kingdom, information and communication technologies	china	10
Theme 3: construction industry, project management, united kingdom, information and communication technologies	france	23
Theme 7: mobile communication, banking, mobile payment, mobile banking	france	2
Theme 7: mobile communication, banking, mobile payment, mobile banking	russia	2
Theme 7: mobile communication, banking, mobile payment, mobile banking	thailand	15
Theme 3: construction industry, project management, united kingdom, information and communication technologies	pakistan	26
Theme 4: supply chain management, supply chains, blockchain, costs	united states	10
Theme 3: construction industry, project management, united kingdom, information and communication technologies	china	16
Theme 3: construction industry, project management, united kingdom, information and communication technologies	canada	2
Theme 3: construction industry, project management, united kingdom, information and communication technologies	nigeria	2
Theme 3: construction industry, project management, united kingdom, information and communication technologies	united states	2
Theme 4: supply chain management, supply chains, blockchain, costs	united states	17.5
Theme 4: supply chain management, supply chains, blockchain, costs	canada	17.5
Theme 3: construction industry, project management, united kingdom, information and communication technologies	egypt	68
Theme 7: mobile communication, banking, mobile payment, mobile banking	china	31
Theme 3: construction industry, project management, united kingdom, information and communication technologies	china	1
Theme 3: construction industry, project management, united kingdom, information and communication technologies	china	8
Theme 4: supply chain management, supply chains, blockchain, costs	singapore	200
Theme 7: mobile communication, banking, mobile payment, mobile banking	india	80
Theme 3: construction industry, project management, united kingdom, information and communication technologies	malaysia	13
Theme 3: construction industry, project management, united kingdom, information and communication technologies	australia	27
Theme 7: mobile communication, banking, mobile payment, mobile banking	canada	5.8
Theme 7: mobile communication, banking, mobile payment, mobile banking	denmark	5.8
Theme 7: mobile communication, banking, mobile payment, mobile banking	israel	5.8
Theme 7: mobile communication, banking, mobile payment, mobile banking	netherlands	5.8
Theme 7: mobile communication, banking, mobile payment, mobile banking	spain	5.8
Theme 3: construction industry, project management, united kingdom, information and communication technologies	germany	36
Theme 4: supply chain management, supply chains, blockchain, costs	spain	74
Theme 4: supply chain management, supply chains, blockchain, costs	spain	113
Theme 3: construction industry, project management, united kingdom, information and communication technologies	brazil	8.5
Theme 3: construction industry, project management, united kingdom, information and communication technologies	denmark	8.5
Theme 4: supply chain management, supply chains, blockchain, costs	turkey	62
Theme 1: artificial intelligence, automation, industry 4.0, research and development	canada	1
Theme 1: artificial intelligence, automation, industry 4.0, research and development	vietnam	40
Theme 1: artificial intelligence, automation, industry 4.0, research and development	india	14
Theme 1: artificial intelligence, automation, industry 4.0, research and development	china	11.5
Theme 1: artificial intelligence, automation, industry 4.0, research and development	japan	11.5
Theme 1: artificial intelligence, automation, industry 4.0, research and development	germany	19
Theme 1: artificial intelligence, automation, industry 4.0, research and development	india	2
Theme 1: artificial intelligence, automation, industry 4.0, research and development	italy	39
Theme 1: artificial intelligence, automation, industry 4.0, research and development	china	0.666667
Theme 1: artificial intelligence, automation, industry 4.0, research and development	india	0.666667
Theme 1: artificial intelligence, automation, industry 4.0, research and development	singapore	0.666667
Theme 1: artificial intelligence, automation, industry 4.0, research and development	china	10.5
Theme 1: artificial intelligence, automation, industry 4.0, research and development	south korea	10.5
Theme 1: artificial intelligence, automation, industry 4.0, research and development	india	40
Theme 1: artificial intelligence, automation, industry 4.0, research and development	germany	11
Theme 1: artificial intelligence, automation, industry 4.0, research and development	nigeria	13
Theme 1: artificial intelligence, automation, industry 4.0, research and development	australia	45.6667
Theme 1: artificial intelligence, automation, industry 4.0, research and development	china	45.6667
Theme 1: artificial intelligence, automation, industry 4.0, research and development	united states	45.6667
Theme 1: artificial intelligence, automation, industry 4.0, research and development	saudi arabia	40
Theme 1: artificial intelligence, automation, industry 4.0, research and development	spain	48
Theme 1: artificial intelligence, automation, industry 4.0, research and development	sri lanka	27
Theme 1: artificial intelligence, automation, industry 4.0, research and development	germany	117
Theme 1: artificial intelligence, automation, industry 4.0, research and development	united states	87
Theme 1: artificial intelligence, automation, industry 4.0, research and development	australia	42
Theme 1: artificial intelligence, automation, industry 4.0, research and development	malaysia	71
Theme 1: artificial intelligence, automation, industry 4.0, research and development	bangladesh	2
Theme 1: artificial intelligence, automation, industry 4.0, research and development	italy	63
Theme 1: artificial intelligence, automation, industry 4.0, research and development	united states	156
Theme 1: artificial intelligence, automation, industry 4.0, research and development	singapore	259
Theme 1: artificial intelligence, automation, industry 4.0, research and development	egypt	56
Theme 1: artificial intelligence, automation, industry 4.0, research and development	china	4
Theme 1: artificial intelligence, automation, industry 4.0, research and development	south korea	44
Theme 1: artificial intelligence, automation, industry 4.0, research and development	united states	22
Theme 1: artificial intelligence, automation, industry 4.0, research and development	south korea	8
Theme 1: artificial intelligence, automation, industry 4.0, research and development	italy	1
Theme 1: artificial intelligence, automation, industry 4.0, research and development	thailand	126
Theme 1: artificial intelligence, automation, industry 4.0, research and development	united states	181
Theme 1: artificial intelligence, automation, industry 4.0, research and development	china	1
Theme 1: artificial intelligence, automation, industry 4.0, research and development	china	1
Theme 1: artificial intelligence, automation, industry 4.0, research and development	india	3
Theme 1: artificial intelligence, automation, industry 4.0, research and development	china	1
Theme 1: artificial intelligence, automation, industry 4.0, research and development	germany	14
Theme 1: artificial intelligence, automation, industry 4.0, research and development	germany	3.5
Theme 1: artificial intelligence, automation, industry 4.0, research and development	italy	3.5
Theme 1: artificial intelligence, automation, industry 4.0, research and development	china	38
Theme 1: artificial intelligence, automation, industry 4.0, research and development	china	3
Theme 1: artificial intelligence, automation, industry 4.0, research and development	united states	3
Theme 1: artificial intelligence, automation, industry 4.0, research and development	australia	3
Theme 1: artificial intelligence, automation, industry 4.0, research and development	united kingdom	13
Theme 1: artificial intelligence, automation, industry 4.0, research and development	france	13
Theme 1: artificial intelligence, automation, industry 4.0, research and development	turkey	32
Theme 1: artificial intelligence, automation, industry 4.0, research and development	italy	22
Theme 1: artificial intelligence, automation, industry 4.0, research and development	china	142
Theme 1: artificial intelligence, automation, industry 4.0, research and development	india	68
Theme 1: artificial intelligence, automation, industry 4.0, research and development	china	3.57143
Theme 1: artificial intelligence, automation, industry 4.0, research and development	india	3.57143
Theme 1: artificial intelligence, automation, industry 4.0, research and development	brazil	3.57143
Theme 1: artificial intelligence, automation, industry 4.0, research and development	mexico	3.57143
Theme 1: artificial intelligence, automation, industry 4.0, research and development	russia	3.57143
Theme 1: artificial intelligence, automation, industry 4.0, research and development	indonesia	3.57143
Theme 1: artificial intelligence, automation, industry 4.0, research and development	turkey	3.57143
Theme 1: artificial intelligence, automation, industry 4.0, research and development	germany	44
Theme 1: artificial intelligence, automation, industry 4.0, research and development	south africa	292
Theme 1: artificial intelligence, automation, industry 4.0, research and development	pakistan	146
Theme 1: artificial intelligence, automation, industry 4.0, research and development	korea	56
Theme 1: artificial intelligence, automation, industry 4.0, research and development	spain	18
Theme 1: artificial intelligence, automation, industry 4.0, research and development	germany	144
Theme 1: artificial intelligence, automation, industry 4.0, research and development	china	27
Theme 1: artificial intelligence, automation, industry 4.0, research and development	nigeria	37
Theme 1: artificial intelligence, automation, industry 4.0, research and development	china	25
Theme 1: artificial intelligence, automation, industry 4.0, research and development	united states	25
Theme 1: artificial intelligence, automation, industry 4.0, research and development	denmark	78
Theme 1: artificial intelligence, automation, industry 4.0, research and development	iran	4
Theme 1: artificial intelligence, automation, industry 4.0, research and development	united states	85
Theme 1: artificial intelligence, automation, industry 4.0, research and development	india	28
Theme 1: artificial intelligence, automation, industry 4.0, research and development	germany	11.3333
Theme 1: artificial intelligence, automation, industry 4.0, research and development	united kingdom	11.3333
Theme 1: artificial intelligence, automation, industry 4.0, research and development	united states	11.3333
Theme 1: artificial intelligence, automation, industry 4.0, research and development	china	2.5
Theme 1: artificial intelligence, automation, industry 4.0, research and development	india	2.5
Theme 1: artificial intelligence, automation, industry 4.0, research and development	iran	30
Theme 1: artificial intelligence, automation, industry 4.0, research and development	china	50
Theme 1: artificial intelligence, automation, industry 4.0, research and development	russia	7
Theme 1: artificial intelligence, automation, industry 4.0, research and development	india	23
Theme 1: artificial intelligence, automation, industry 4.0, research and development	malaysia	118
Theme 1: artificial intelligence, automation, industry 4.0, research and development	germany	10
Theme 1: artificial intelligence, automation, industry 4.0, research and development	indonesia	10
Theme 1: artificial intelligence, automation, industry 4.0, research and development	united states	10
Theme 1: artificial intelligence, automation, industry 4.0, research and development	japan	10
Theme 1: artificial intelligence, automation, industry 4.0, research and development	korea	19
Theme 1: artificial intelligence, automation, industry 4.0, research and development	brazil	65
Theme 1: artificial intelligence, automation, industry 4.0, research and development	india	86
Theme 1: artificial intelligence, automation, industry 4.0, research and development	denmark	0.333333
Theme 1: artificial intelligence, automation, industry 4.0, research and development	germany	0.333333
Theme 1: artificial intelligence, automation, industry 4.0, research and development	turkey	0.333333
Theme 1: artificial intelligence, automation, industry 4.0, research and development	bangladesh	4
Theme 1: artificial intelligence, automation, industry 4.0, research and development	italy	40
Theme 1: artificial intelligence, automation, industry 4.0, research and development	iran	15
Theme 1: artificial intelligence, automation, industry 4.0, research and development	pakistan	6
Theme 1: artificial intelligence, automation, industry 4.0, research and development	china	3
Theme 1: artificial intelligence, automation, industry 4.0, research and development	turkey	14
Theme 1: artificial intelligence, automation, industry 4.0, research and development	korea	2
Theme 1: artificial intelligence, automation, industry 4.0, research and development	finland	19
Theme 1: artificial intelligence, automation, industry 4.0, research and development	iran	80.5
Theme 1: artificial intelligence, automation, industry 4.0, research and development	bangladesh	80.5
Theme 1: artificial intelligence, automation, industry 4.0, research and development	mexico	6.5
Theme 1: artificial intelligence, automation, industry 4.0, research and development	brazil	6.5
Theme 1: artificial intelligence, automation, industry 4.0, research and development	france	57
Theme 1: artificial intelligence, automation, industry 4.0, research and development	australia	57
Theme 1: artificial intelligence, automation, industry 4.0, research and development	united states	11
Theme 1: artificial intelligence, automation, industry 4.0, research and development	bangladesh	4.5
Theme 1: artificial intelligence, automation, industry 4.0, research and development	australia	4.5
Theme 1: artificial intelligence, automation, industry 4.0, research and development	india	2
Theme 1: artificial intelligence, automation, industry 4.0, research and development	china	1
Theme 1: artificial intelligence, automation, industry 4.0, research and development	china	7
Theme 1: artificial intelligence, automation, industry 4.0, research and development	germany	8
Theme 1: artificial intelligence, automation, industry 4.0, research and development	thailand	24
Theme 1: artificial intelligence, automation, industry 4.0, research and development	united states	14
Theme 1: artificial intelligence, automation, industry 4.0, research and development	united states	17
Theme 1: artificial intelligence, automation, industry 4.0, research and development	germany	10
Theme 1: artificial intelligence, automation, industry 4.0, research and development	united states	17
Theme 1: artificial intelligence, automation, industry 4.0, research and development	china	7
Theme 1: artificial intelligence, automation, industry 4.0, research and development	india	88
Theme 1: artificial intelligence, automation, industry 4.0, research and development	china	188
Theme 1: artificial intelligence, automation, industry 4.0, research and development	china	87
Theme 1: artificial intelligence, automation, industry 4.0, research and development	china	1
Theme 1: artificial intelligence, automation, industry 4.0, research and development	china	1
Theme 1: artificial intelligence, automation, industry 4.0, research and development	brazil	1
Theme 1: artificial intelligence, automation, industry 4.0, research and development	korea	134
Theme 1: artificial intelligence, automation, industry 4.0, research and development	spain	13
Theme 1: artificial intelligence, automation, industry 4.0, research and development	indonesia	73
Theme 1: artificial intelligence, automation, industry 4.0, research and development	singapore	1
Theme 1: artificial intelligence, automation, industry 4.0, research and development	australia	17
Theme 1: artificial intelligence, automation, industry 4.0, research and development	china	5.5
Theme 1: artificial intelligence, automation, industry 4.0, research and development	japan	5.5
Theme 1: artificial intelligence, automation, industry 4.0, research and development	vietnam	13
Theme 1: artificial intelligence, automation, industry 4.0, research and development	united states	3.5
Theme 1: artificial intelligence, automation, industry 4.0, research and development	united kingdom	3.5
Theme 1: artificial intelligence, automation, industry 4.0, research and development	germany	3.5
Theme 1: artificial intelligence, automation, industry 4.0, research and development	france	3.5
Theme 1: artificial intelligence, automation, industry 4.0, research and development	china	4
Theme 1: artificial intelligence, automation, industry 4.0, research and development	china	19
Theme 1: artificial intelligence, automation, industry 4.0, research and development	united states	1
Theme 1: artificial intelligence, automation, industry 4.0, research and development	france	1
Theme 1: artificial intelligence, automation, industry 4.0, research and development	india	20
Theme 1: artificial intelligence, automation, industry 4.0, research and development	brazil	1
Theme 1: artificial intelligence, automation, industry 4.0, research and development	iran	146
Theme 1: artificial intelligence, automation, industry 4.0, research and development	sweden	7
Theme 1: artificial intelligence, automation, industry 4.0, research and development	france	54
Theme 1: artificial intelligence, automation, industry 4.0, research and development	south korea	4
Theme 1: artificial intelligence, automation, industry 4.0, research and development	germany	40
Theme 1: artificial intelligence, automation, industry 4.0, research and development	australia	1
Theme 1: artificial intelligence, automation, industry 4.0, research and development	canada	2
Theme 1: artificial intelligence, automation, industry 4.0, research and development	netherlands	112
Theme 1: artificial intelligence, automation, industry 4.0, research and development	iran	10
Theme 1: artificial intelligence, automation, industry 4.0, research and development	singapore	1
Theme 1: artificial intelligence, automation, industry 4.0, research and development	thailand	1
Theme 1: artificial intelligence, automation, industry 4.0, research and development	singapore	1
Theme 1: artificial intelligence, automation, industry 4.0, research and development	japan	1
Theme 1: artificial intelligence, automation, industry 4.0, research and development	russia	13
Theme 1: artificial intelligence, automation, industry 4.0, research and development	sweden	42
Theme 1: artificial intelligence, automation, industry 4.0, research and development	australia	73
Not Clustered (Low Keyword Overlap)	china	80
Not Clustered (Low Keyword Overlap)	iran	35
Not Clustered (Low Keyword Overlap)	singapore	12
Not Clustered (Low Keyword Overlap)	india	7
Not Clustered (Low Keyword Overlap)	indonesia	6
Not Clustered (Low Keyword Overlap)	india	12
Not Clustered (Low Keyword Overlap)	turkey	4
Not Clustered (Low Keyword Overlap)	china	11
Not Clustered (Low Keyword Overlap)	australia	111
Not Clustered (Low Keyword Overlap)	united states	63.3333
Not Clustered (Low Keyword Overlap)	pakistan	63.3333
Not Clustered (Low Keyword Overlap)	canada	63.3333
Not Clustered (Low Keyword Overlap)	united states	134
Not Clustered (Low Keyword Overlap)	sweden	49
Not Clustered (Low Keyword Overlap)	united kingdom	45
Not Clustered (Low Keyword Overlap)	japan	29
Not Clustered (Low Keyword Overlap)	india	6
Not Clustered (Low Keyword Overlap)	denmark	1
Not Clustered (Low Keyword Overlap)	russia	1
Not Clustered (Low Keyword Overlap)	united kingdom	25
Not Clustered (Low Keyword Overlap)	saudi arabia	25
Not Clustered (Low Keyword Overlap)	iran	34
Not Clustered (Low Keyword Overlap)	nigeria	123
Not Clustered (Low Keyword Overlap)	india	37
Not Clustered (Low Keyword Overlap)	malaysia	16
Not Clustered (Low Keyword Overlap)	malaysia	21
Not Clustered (Low Keyword Overlap)	nigeria	6
Not Clustered (Low Keyword Overlap)	saudi arabia	101
Not Clustered (Low Keyword Overlap)	india	42
Not Clustered (Low Keyword Overlap)	germany	1
Not Clustered (Low Keyword Overlap)	germany	36
Not Clustered (Low Keyword Overlap)	malaysia	92
Not Clustered (Low Keyword Overlap)	germany	27
Not Clustered (Low Keyword Overlap)	germany	6
Not Clustered (Low Keyword Overlap)	denmark	6
Not Clustered (Low Keyword Overlap)	china	122
Not Clustered (Low Keyword Overlap)	china	187
Not Clustered (Low Keyword Overlap)	south africa	154
Not Clustered (Low Keyword Overlap)	indonesia	2
Not Clustered (Low Keyword Overlap)	indonesia	47
Not Clustered (Low Keyword Overlap)	pakistan	1
Not Clustered (Low Keyword Overlap)	india	5
Not Clustered (Low Keyword Overlap)	india	10
Not Clustered (Low Keyword Overlap)	finland	63
Not Clustered (Low Keyword Overlap)	bangladesh	64
Not Clustered (Low Keyword Overlap)	pakistan	171
Not Clustered (Low Keyword Overlap)	india	2
Not Clustered (Low Keyword Overlap)	china	62
Not Clustered (Low Keyword Overlap)	thailand	16
Not Clustered (Low Keyword Overlap)	sweden	67
Not Clustered (Low Keyword Overlap)	vietnam	198
Not Clustered (Low Keyword Overlap)	finland	173
Not Clustered (Low Keyword Overlap)	china	130
Not Clustered (Low Keyword Overlap)	united states	12
Not Clustered (Low Keyword Overlap)	united states	34
Not Clustered (Low Keyword Overlap)	spain	32
Not Clustered (Low Keyword Overlap)	pakistan	145
Not Clustered (Low Keyword Overlap)	united states	18
Not Clustered (Low Keyword Overlap)	malaysia	3
Not Clustered (Low Keyword Overlap)	south korea	142
Not Clustered (Low Keyword Overlap)	denmark	53
Not Clustered (Low Keyword Overlap)	korea	180
Not Clustered (Low Keyword Overlap)	united states	111
Not Clustered (Low Keyword Overlap)	united states	20
Not Clustered (Low Keyword Overlap)	united states	24
Not Clustered (Low Keyword Overlap)	uae	16
Not Clustered (Low Keyword Overlap)	korea	121
Not Clustered (Low Keyword Overlap)	malaysia	1.5
Not Clustered (Low Keyword Overlap)	sweden	1.5
Not Clustered (Low Keyword Overlap)	south korea	22
Not Clustered (Low Keyword Overlap)	korea	149
Not Clustered (Low Keyword Overlap)	norway	29
Not Clustered (Low Keyword Overlap)	germany	29
Not Clustered (Low Keyword Overlap)	united states	29
Not Clustered (Low Keyword Overlap)	korea	34.5
Not Clustered (Low Keyword Overlap)	united states	34.5
Not Clustered (Low Keyword Overlap)	india	13
Not Clustered (Low Keyword Overlap)	finland	1
Not Clustered (Low Keyword Overlap)	iran	4
Not Clustered (Low Keyword Overlap)	finland	48
Not Clustered (Low Keyword Overlap)	united states	21
Theme 2: china, investments, electric vehicle, electric vehicles	nigeria	1
Theme 2: china, investments, electric vehicle, electric vehicles	united states	63
Theme 2: china, investments, electric vehicle, electric vehicles	china	63
Not Clustered (Low Keyword Overlap)	india	11
Not Clustered (Low Keyword Overlap)	china	1
Not Clustered (Low Keyword Overlap)	south korea	18
Not Clustered (Low Keyword Overlap)	pakistan	22
Not Clustered (Low Keyword Overlap)	malaysia	4.33333
Not Clustered (Low Keyword Overlap)	united states	4.33333
Not Clustered (Low Keyword Overlap)	china	4.33333
Not Clustered (Low Keyword Overlap)	south korea	59
Not Clustered (Low Keyword Overlap)	vietnam	36
Not Clustered (Low Keyword Overlap)	india	16
Not Clustered (Low Keyword Overlap)	united states	7
Not Clustered (Low Keyword Overlap)	korea	7
Not Clustered (Low Keyword Overlap)	australia	32
Not Clustered (Low Keyword Overlap)	vietnam	1.5
Not Clustered (Low Keyword Overlap)	australia	1.5
Not Clustered (Low Keyword Overlap)	saudi arabia	10
Not Clustered (Low Keyword Overlap)	india	2
Not Clustered (Low Keyword Overlap)	australia	2
Not Clustered (Low Keyword Overlap)	australia	1
Not Clustered (Low Keyword Overlap)	australia	1
Not Clustered (Low Keyword Overlap)	australia	1
Not Clustered (Low Keyword Overlap)	australia	10
Not Clustered (Low Keyword Overlap)	bangladesh	10
Not Clustered (Low Keyword Overlap)	australia	5
Not Clustered (Low Keyword Overlap)	sweden	1
Not Clustered (Low Keyword Overlap)	united kingdom	13
Not Clustered (Low Keyword Overlap)	china	26.5
Not Clustered (Low Keyword Overlap)	united states	26.5
Not Clustered (Low Keyword Overlap)	china	70
Not Clustered (Low Keyword Overlap)	united states	57
Not Clustered (Low Keyword Overlap)	united states	110
Not Clustered (Low Keyword Overlap)	australia	1
Not Clustered (Low Keyword Overlap)	finland	9
Not Clustered (Low Keyword Overlap)	china	24
Not Clustered (Low Keyword Overlap)	south africa	14
Not Clustered (Low Keyword Overlap)	united states	15
Not Clustered (Low Keyword Overlap)	united states	4.5
Not Clustered (Low Keyword Overlap)	turkey	4.5
Not Clustered (Low Keyword Overlap)	australia	4.5
Not Clustered (Low Keyword Overlap)	united kingdom	4.5
Not Clustered (Low Keyword Overlap)	china	1
Not Clustered (Low Keyword Overlap)	china	19
Not Clustered (Low Keyword Overlap)	china	1
Not Clustered (Low Keyword Overlap)	south africa	1
Not Clustered (Low Keyword Overlap)	china	3
Not Clustered (Low Keyword Overlap)	china	52
Not Clustered (Low Keyword Overlap)	south africa	4
Not Clustered (Low Keyword Overlap)	china	32
Not Clustered (Low Keyword Overlap)	vietnam	61
Not Clustered (Low Keyword Overlap)	finland	20
Not Clustered (Low Keyword Overlap)	italy	47
Not Clustered (Low Keyword Overlap)	finland	36
Not Clustered (Low Keyword Overlap)	australia	51
Not Clustered (Low Keyword Overlap)	philippines	1
Not Clustered (Low Keyword Overlap)	pakistan	1
Not Clustered (Low Keyword Overlap)	germany	22
Not Clustered (Low Keyword Overlap)	bangladesh	25
Not Clustered (Low Keyword Overlap)	finland	422
Not Clustered (Low Keyword Overlap)	bangladesh	25
Not Clustered (Low Keyword Overlap)	united states	27
Not Clustered (Low Keyword Overlap)	australia	46
Not Clustered (Low Keyword Overlap)	united kingdom	103
Not Clustered (Low Keyword Overlap)	united states	1
Not Clustered (Low Keyword Overlap)	china	14
Not Clustered (Low Keyword Overlap)	bangladesh	78
Not Clustered (Low Keyword Overlap)	australia	43.5
Not Clustered (Low Keyword Overlap)	united states	43.5
Not Clustered (Low Keyword Overlap)	uae	41
Not Clustered (Low Keyword Overlap)	india	1.75
Not Clustered (Low Keyword Overlap)	united states	1.75
Not Clustered (Low Keyword Overlap)	canada	1.75
Not Clustered (Low Keyword Overlap)	netherlands	1.75
Not Clustered (Low Keyword Overlap)	saudi arabia	403
Not Clustered (Low Keyword Overlap)	italy	21
Not Clustered (Low Keyword Overlap)	denmark	13

## Sheet: Theme_Gini
Theme	Gini	Countries	TotalWeight
Theme 5: health care, mhealth, india, internet of things	0.792723	19	1814
Theme 7: mobile communication, banking, mobile payment, mobile banking	0.745972	25	3238
Theme 4: supply chain management, supply chains, blockchain, costs	0.733688	19	2514
Theme 2: china, investments, electric vehicle, electric vehicles	0.73081	34	6106
Theme 3: construction industry, project management, united kingdom, information and communication technologies	0.631846	29	4417
Theme 8: social media, social networking (online), knowledge, psychology	0.602203	17	1076
Theme 10: retailing, mobile phone, shopping activity, social influence	0.596986	13	878
Not Clustered (Low Keyword Overlap)	0.585269	32	6462
Theme 1: artificial intelligence, automation, industry 4.0, research and development	0.530895	34	5306
Theme 9: virtual reality, tourism, travel behavior, tourist destination	0.507006	16	1570
Theme 6: engineering education, agriculture, agricultural technology, learning	0.329131	11	274
